# Supplementary material for: Relationships between community composition, productivity and invasion resistance in semi-natural bacterial microcosms
Source: eLife. 2021 Oct 18;10:e71811. doi: 10.7554/eLife.71811 (PMC8523168; doi:10.7554/eLife.71811)
Supplement: Figure 1—source data 1. — The invader survival data columns are labelled in the format ‘invader identity.cell density per ml.hours since invasion’. [file elife-71811-fig1-data1.csv]

Community	sbw25.cfu.24h	sbw25.cfu.96h	sbw25.cfu.7d	kt2440.cfu.24h	kt2440.cfu.96h	kt2440.cfu.7d
AE01	22655.3695957435	10646.8822330769	5807.28676459116	21930.0232932104	6012.31952319879	7600.03343251484
AE02	18930.6292306351	16214.3184533435	6408.39691274201	12933.3488186236	5722.08883873294	7384.30610725739
AE03	20338.8512282924	15530.1868210658	10001.4649997267	6952.14891157651	6012.31952319879	4774.92981128617
AE04	21582.0086642842	54798.7030463737	5067.67748204412	15041.8029211654	12580.7611012817	4994.07267098302
AE06	17709.9373005051	26893.4053369355	5807.28676459116	8030.82084611036	2184.0235871413	6735.70354200511
AE07	19633.0301874111	12835.6388462012	5067.67748204412	9532.19664365385	7456.24060079333	7600.03343251484
AE08	16672.5982119313	7478.66980358814	6106.83997751961	7815.53613090606	6880.02832948602	5867.2700778771
AE09	16500.5407823785	23254.6921672684	6559.90493713248	22758.998111975	17627.4703165231	5649.44768102435
AE10	9202.59222254444	13726.0449502336	5658.28471764599	10172.9066752902	5139.97100236364	7600.03343251484
AE102	7478.66980358814	5658.28471764599	5067.67748204412	5867.2700778771	6302.03650605272	7456.24060079333
AE104	23555.1430805673	3726.85086130947	4104.17556924074	3006.5423344927	3080.86945633403	4555.41691939217
AE105	535576.798894898	16443.2421283929	6661.17487499426	13989.0358344963	7168.34710127515	5139.97100236364
AE106	2894163.18509191	145599.081492005	44423.6832901569	100634.908264205	9460.91082082839	5722.08883873294
AE108	1201976.2373687	106377.276373521	35129.6747914234	68855.8800858135	10315.082306535	6302.03650605272
AE109	7324.42227953607	3170.5700484874	5067.67748204412	3229.32800049687	8030.82084611036	8889.90022750322
AE11	14286.5816668983	30600.205451557	5956.808365677	7384.30610725739	14270.0495715319	4335.51480583334
AE111	8413.01059021106	3914.89744259055	3726.85086130947	4335.51480583334	6012.31952319879	7456.24060079333
AE112	15814.7559264841	8308.46776743514	7633.34936472273	9532.19664365385	3673.24816179584	6302.03650605272
AE113	17536.4615750039	9574.27832997184	10485.0175286668	8245.89384621439	3377.53628855491	6735.70354200511
AE114	15132.9755711688	8517.72962958827	9043.9137480305	10599.2188672872	12015.8605567602	5431.31640679188
AE115	17536.4615750039	13279.8311885295	8099.91726070488	8460.76105452585	12580.7611012817	6952.14891157651
AE117	48710.6716336649	17825.7158942175	7324.42227953607	27299.6160501229	5139.97100236364	5212.86291207678
AE118	17536.4615750039	14174.2319893457	7478.66980358814	9959.50601417923	7743.72643850288	4335.51480583334
AE119	25550.9380788702	15757.7862030214	9680.83765029827	7815.53613090606	8889.90022750322	7815.53613090606
AE120	22475.988141261	7068.32122683791	6559.90493713248	17139.4239254783	6302.03650605272	3673.24816179584
AE122	33169.1380150838	10863.2206554491	6864.33923169716	17139.4239254783	7456.24060079333	5649.44768102435
AE123	53519.6257507121	4294.64354189669	19985.5187483976	15462.1423609394	5431.31640679188	3229.32800049687
AE124	23555.1430805673	5460.44076253933	7478.66980358814	7600.03343251484	3080.86945633403	8030.82084611036
AE125	17536.4615750039	7892.09142036748	4199.26331119371	8675.42807711452	2783.14829423242	5649.44768102435
AE127	14963.1713111386	5460.44076253933	2806.81041192628	12510.2003200692	7168.34710127515	6952.14891157651
AE128	16844.8964248611	8308.46776743514	6257.37243174712	9959.50601417923	5431.31640679188	4994.07267098302
AE129	23735.6634727574	6257.37243174712	4342.44184910028	10599.2188672872	3673.24816179584	5431.31640679188
AE13	52713.9089969401	327338.764321996	8256.26294041053	11874.4846795651	73754.6922591516	6519.00245327666
AE130	43376.7656594096	13279.8311885295	7788.45456104485	14410.480029481	5139.97100236364	6952.14891157651
AE131	33169.1380150838	22775.0642677089	6408.39691274201	11449.9828496712	3968.08755265501	3006.5423344927
AE133	25916.1397654349	8099.91726070488	5658.28471764599	16301.5755573646	2184.0235871413	6735.70354200511
AE134	54124.994465369	19691.7192115461	6711.88833486356	51467.4620132842	7743.72643850288	8675.42807711452
AE135	24459.5959457604	14850.1130852048	2142.22261192336	17975.7705501177	5722.08883873294	6084.79589579673
AE136	75211.1418512226	13057.4792303655	9202.59222254444	9104.18254886758	2783.14829423242	7815.53613090606
AE137	41033.764989039	3354.63623126694	4056.74291396582	13144.7315383057	7743.72643850288	5867.2700778771
AE139	79449.8507373579	19222.8748750832	9202.59222254444	23793.6642945773	3377.53628855491	3894.45550573382
AE14	24278.3372202816	170499.705971378	5658.28471764599	8245.89384621439	8603.89431201518	7815.53613090606
AE143	63311.7817140493	102550.986777243	5509.8121674369	24826.6806126902	48449.289611093	5212.86291207678
AE144	16672.5982119313	7685.00411420716	6711.88833486356	8245.89384621439	5722.08883873294	9318.27983405056
AE145	16328.7259644266	14399.0511152754	3914.89744259055	10172.9066752902	8889.90022750322	7168.34710127515
AE146	47915.2315475024	148064.831855214	5361.8794821301	13989.0358344963	6302.03650605272	4115.20222080752
AE147	46725.4236643505	24217.9582776817	6408.39691274201	22551.8599255666	7743.72643850288	6084.79589579673
AE149	190945.186761695	27383.8586832981	8885.61140201036	13989.0358344963	10599.2188672872	4555.41691939217
AE15	10971.6097804492	50773.6677455982	2405.12760301445	6519.00245327666	25101.8825332582	6302.03650605272
AE150	144829.688270542	158605.651483291	8885.61140201036	13989.0358344963	59685.1386046704	6519.00245327666
AE151	73945.7317524916	134269.505068011	5214.49748423077	8245.89384621439	58351.9180700235	2108.73703232234
AE152	230750.956914233	23735.6634727574	6661.17487499426	44414.205345751	6591.26511389237	7456.24060079333
AE153	222171.36098179	25186.4418974165	5658.28471764599	136506.045626442	3080.86945633403	2184.0235871413
AE154	26648.6307615508	5857.0700492999	3726.85086130947	22137.3732189142	964.5233751467	5431.31640679188
AE156	137242.887675718	26893.4053369355	11953.524438726	33855.9028331045	4555.41691939217	4848.01765184336
AE157	349511.975375254	11953.524438726	44685.9386922361	78773.4976682587	4262.12400045054	2184.0235871413
AE158	44554.7848614983	5857.0700492999	7273.10358357974	15252.0258096315	2484.25078702169	4262.12400045054
AE159	150381.53578294	10001.4649997267	6257.37243174712	29559.2431798501	5722.08883873294	3377.53628855491
AE16	9521.05872380739	7068.32122683791	3914.89744259055	9959.50601417923	11166.6615305177	5867.2700778771
AE160	91045.2703966655	10431.1374803377	3170.5700484874	8245.89384621439	4555.41691939217	6012.31952319879
AE161	50106.9213559323	7068.32122683791	4678.99675261483	17975.7705501177	3673.24816179584	2484.25078702169
AE162	16500.5407823785	6661.17487499426	2806.81041192628	5431.31640679188	0	7743.72643850288
AE163	63105.5511643188	5460.44076253933	7068.32122683791	8889.90022750322	2184.0235871413	6880.02832948602
AE164	72683.2473592744	6257.37243174712	5658.28471764599	14621.0317000869	4262.12400045054	3080.86945633403
AE165	830702.404431209	16214.3184533435	8938.33676054417	93172.5962524474	2783.14829423242	2484.25078702169
AE166	82435.3778388864	8938.33676054417	10215.9953264995	15041.8029211654	1578.7179258101	3377.53628855491
AE167	23916.3699756772	5067.67748204412	9361.64208507319	9104.18254886758	3968.08755265501	4848.01765184336
AE168	22475.988141261	7685.00411420716	5658.28471764599	3673.24816179584	1272.99494680496	3968.08755265501
AE169	13949.8947215026	3540.08085856838	4104.17556924074	5212.86291207678	1578.7179258101	4555.41691939217
AE17	16672.5982119313	29605.4372693922	8570.15473478918	28738.3208007215	12298.4299264461	5649.44768102435
AE170	18231.7404591178	4678.99675261483	3170.5700484874	8675.42807711452	4262.12400045054	7168.34710127515
AE171	59409.2165123108	5067.67748204412	5857.0700492999	17557.7800958566	5431.31640679188	5139.97100236364
AE173	86941.1430963762	6864.33923169716	8938.33676054417	17766.820456734	2783.14829423242	5722.08883873294
AE174	134497.912997047	15303.0382415833	7892.09142036748	11662.3046844727	2484.25078702169	2783.14829423242
AE175	27568.0869543197	6864.33923169716	7068.32122683791	10386.1430871192	3673.24816179584	6591.26511389237
AE176	63724.515624049	7892.09142036748	3914.89744259055	19019.205476252	652.315838262762	4262.12400045054
AE177	22296.800346919	4872.81221876285	4104.17556924074	8889.90022750322	334.263662174334	8030.82084611036
AE178	11461.1428065873	2987.94025746926	3354.63623126694	6519.00245327666	5722.08883873294	5139.97100236364
AE18	14624.3466014237	27875.5044888305	5067.67748204412	20892.1785408718	12298.4299264461	8460.76105452585
AE19	55541.0797498548	107262.94425376	6257.37243174712	8889.90022750322	37387.1838482786	3451.55030922969
AE20	124498.617196813	376950.585140548	8413.01059021106	12721.8391681723	100046.536900682	4555.41691939217
AE21	31661.9644350647	198791.522484781	7017.25003300809	5431.31640679188	34128.0033441254	7815.53613090606
AE24	7633.34936472273	20870.4089346806	3079.07177280514	7384.30610725739	17906.130478641	4335.51480583334
AE25	30351.0968911496	230259.51327579	37553.2276981341	11024.9022457218	72961.1230058092	3894.45550573382
AE28	1068427.38662721	42333.2588101074	13446.9271052854	17348.6483132935	34671.9661482494	6084.79589579673
AE29	80088.347889098	18289.8446990039	7170.61340875723	9532.19664365385	7743.72643850288	6952.14891157651
AE30	12283.3186787858	18522.5111525537	5214.49748423077	4335.51480583334	9745.93732243139	5431.31640679188
AE31	10971.6097804492	29357.4450397845	3633.30333156149	3894.45550573382	10883.0760027195	3451.55030922969
AE32	10809.0808708291	9574.27832997184	6711.88833486356	5867.2700778771	7743.72643850288	4115.20222080752
AE33	11789.086148131	26893.4053369355	6408.39691274201	7815.53613090606	16231.6845329122	5212.86291207678
AE34	7478.66980358814	12614.3164685197	2273.16019240272	9318.27983405056	13144.7315383057	5649.44768102435
AE35	10646.8822330769	16214.3184533435	1883.62385535483	10812.1374800346	56750.5732797786	3229.32800049687
AE36	60228.0028781755	7685.00411420716	4775.77133730065	7384.30610725739	12298.4299264461	6084.79589579673
AE37	11624.9578755294	6458.84627022736	4630.71056806774	13778.1396509332	7168.34710127515	5867.2700778771
AE38	11789.086148131	39223.8264397218	5509.8121674369	6735.70354200511	6302.03650605272	4555.41691939217
AE39	7633.34936472273	21819.9216791286	4921.43130415504	3451.55030922969	3968.08755265501	5212.86291207678
AE40	8099.91726070488	9361.64208507319	4775.77133730065	3451.55030922969	3377.53628855491	5431.31640679188
AE41	10323.49050898	14399.0511152754	3914.89744259055	9745.93732243139	9745.93732243139	6735.70354200511
AE42	7478.66980358814	23014.7090219613	3633.30333156149	9318.27983405056	15111.8891301292	3006.5423344927
AE43	6559.90493713248	10431.1374803377	4056.74291396582	9318.27983405056	10030.6580477313	5867.2700778771
AE44	7788.45456104485	7478.66980358814	5509.8121674369	10172.9066752902	11449.9828496712	7600.03343251484
AE45	7788.45456104485	7892.09142036748	4199.26331119371	9532.19664365385	11733.0469730614	3894.45550573382
AE46	10001.4649997267	9787.5560427996	3773.74464726518	11449.9828496712	2184.0235871413	4335.51480583334
AE47	6257.37243174712	8099.91726070488	6257.37243174712	6952.14891157651	5139.97100236364	4994.07267098302
AE48	7170.61340875723	8938.33676054417	7324.42227953607	4774.92981128617	8317.53883161759	5867.2700778771
AE49	17536.4615750039	27875.5044888305	2942.51455856673	9318.27983405056	16511.1828301142	6302.03650605272
AE51	6864.33923169716	24459.5959457604	3633.30333156149	5649.44768102435	13426.3814912658	8675.42807711452
AE53	7170.61340875723	6661.17487499426	3354.63623126694	8675.42807711452	4555.41691939217	3894.45550573382
AE54	5956.808365677	10863.2206554491	4056.74291396582	6735.70354200511	2783.14829423242	4335.51480583334
AE55	7478.66980358814	5658.28471764599	6408.39691274201	11874.4846795651	11449.9828496712	6302.03650605272
AE56	4775.77133730065	8938.33676054417	4199.26331119371	7600.03343251484	6591.26511389237	8030.82084611036
AE57	10485.0175286668	8727.69005925535	3914.89744259055	5867.2700778771	1578.7179258101	5867.2700778771
AE58	7478.66980358814	17825.7158942175	3079.07177280514	6735.70354200511	13707.8146651295	3894.45550573382
AE59	5067.67748204412	4104.17556924074	4342.44184910028	2334.31453429402	3968.08755265501	8030.82084611036
AE60	6864.33923169716	4104.17556924074	3354.63623126694	6735.70354200511	964.5233751467	5649.44768102435
AE61	6257.37243174712	2098.81335110841	2012.36042681227	6735.70354200511	0	6519.00245327666
AE62	5509.8121674369	1756.06854527894	2806.81041192628	5212.86291207678	4848.01765184336	4335.51480583334
AE63	5956.808365677	1756.06854527894	4342.44184910028	11662.3046844727	4848.01765184336	6735.70354200511
AE64	5807.28676459116	1587.94061265685	4342.44184910028	10172.9066752902	2484.25078702169	7384.30610725739
AE65	11134.465387089	10646.8822330769	4630.71056806774	6952.14891157651	1272.99494680496	5431.31640679188
AE66	7633.34936472273	6661.17487499426	5361.8794821301	7815.53613090606	7456.24060079333	6084.79589579673
AE67	7170.61340875723	5857.0700492999	5214.49748423077	4994.07267098302	10030.6580477313	6519.00245327666
AE68	22475.988141261	8938.33676054417	4056.74291396582	23173.0675637993	7456.24060079333	4774.92981128617
AE69	7943.97919443324	5658.28471764599	2538.08329811971	8030.82084611036	2484.25078702169	6302.03650605272
AE70	5509.8121674369	1098.67653426643	5956.808365677	3894.45550573382	4555.41691939217	5212.86291207678
AE71	5509.8121674369	5067.67748204412	3633.30333156149	5431.31640679188	4848.01765184336	4994.07267098302
AE72	9521.05872380739	4872.81221876285	6864.33923169716	12298.4299264461	8030.82084611036	7168.34710127515
AE73	10809.0808708291	12835.6388462012	3914.89744259055	8030.82084611036	10883.0760027195	6735.70354200511
AE74	6864.33923169716	12173.2523677125	4056.74291396582	18184.6315018995	9460.91082082839	6735.70354200511
AE76	8727.69005925535	3726.85086130947	3914.89744259055	6952.14891157651	7743.72643850288	3451.55030922969
AE77	7170.61340875723	13279.8311885295	16672.5982119313	6735.70354200511	8889.90022750322	5867.2700778771
AE78	7478.66980358814	4104.17556924074	32226.0407853475	6735.70354200511	5139.97100236364	4774.92981128617
AE79	10485.0175286668	2627.25055557648	2627.25055557648	5212.86291207678	8030.82084611036	7168.34710127515
AE80	27383.8586832981	5460.44076253933	4104.17556924074	7600.03343251484	9460.91082082839	7168.34710127515
AE81	320819.891687373	4104.17556924074	5857.0700492999	44818.300665695	4555.41691939217	5139.97100236364
AE82	35447.3050841915	4104.17556924074	4872.81221876285	7384.30610725739	3377.53628855491	3080.86945633403
AE83	24641.0367491118	7892.09142036748	5263.5629416912	6519.00245327666	5722.08883873294	3673.24816179584
AE84	19457.1058086314	10863.2206554491	18289.8446990039	7168.34710127515	6302.03650605272	4262.12400045054
AE85	102404.20265434	124573.972590574	13502.6884602715	23586.8655216468	8030.82084611036	5722.08883873294
AE86	15985.8316301031	13279.8311885295	5857.0700492999	6519.00245327666	8603.89431201518	7456.24060079333
AE87	13446.9271052854	4294.64354189669	2627.25055557648	5431.31640679188	7743.72643850288	5139.97100236364
AE88	18755.5740535588	6056.77334578999	3726.85086130947	6302.03650605272	10315.082306535	5139.97100236364
AE89	42007.8719917449	3354.63623126694	6056.77334578999	8675.42807711452	4848.01765184336	6591.26511389237
AE90	25550.9380788702	6458.84627022736	7273.10358357974	7384.30610725739	4848.01765184336	4262.12400045054
AE91	21048.0053727014	6661.17487499426	14850.1130852048	9745.93732243139	7168.34710127515	6880.02832948602
AE94	18057.5783641131	6458.84627022736	6056.77334578999	2783.14829423242	6012.31952319879	7456.24060079333
AE96	45145.3870319145	9149.65790097391	5857.0700492999	19644.2512822296	8889.90022750322	8317.53883161759
AE99	126308.84495361	22058.1864983522	13726.0449502336	46836.7965819618	9745.93732243139	9460.91082082839
BB02	120888.871921742	18755.5740535588	7478.66980358814	10812.1374800346	7815.53613090606	5139.97100236364
BB04	79024.5713323138	17363.2179249153	10863.2206554491	26888.051957656	1196.16369729411	6012.31952319879
BB05	66623.7036518534	10809.0808708291	8308.46776743514	9745.93732243139	3451.55030922969	5431.31640679188
BB06	14286.5816668983	7943.97919443324	7273.10358357974	10386.1430871192	2559.09319113468	5431.31640679188
BB07	22834.9435910633	7324.42227953607	9361.64208507319	10812.1374800346	4994.07267098302	5722.08883873294
BB08	84148.0256080724	37553.2276981341	7892.09142036748	11874.4846795651	3229.32800049687	4848.01765184336
BB09	13446.9271052854	5956.808365677	5263.5629416912	6519.00245327666	4994.07267098302	4848.01765184336
BB10	19985.5187483976	3493.59345207644	5067.67748204412	8460.76105452585	5649.44768102435	4262.12400045054
BB11	13113.0195072771	3216.45428574537	5067.67748204412	6302.03650605272	3673.24816179584	6591.26511389237
BB12	41423.0362055741	5067.67748204412	4486.26262891485	8245.89384621439	1426.15783127688	5139.97100236364
BB14	46725.4236643505	5509.8121674369	2273.16019240272	5649.44768102435	964.5233751467	4555.41691939217
BB15	20693.0169108124	4921.43130415504	10863.2206554491	8889.90022750322	4555.41691939217	7168.34710127515
BB16	108593.303102079	16844.8964248611	7068.32122683791	6519.00245327666	3006.5423344927	5431.31640679188
BB17	15643.9304616541	7478.66980358814	4294.64354189669	9532.19664365385	3673.24816179584	5431.31640679188
BB18	27752.4820925803	5067.67748204412	4872.81221876285	9959.50601417923	4774.92981128617	6880.02832948602
BB20	12946.4946936206	2405.12760301445	8727.69005925535	6519.00245327666	4115.20222080752	6591.26511389237
BB21	32226.0407853475	4630.71056806774	6661.17487499426	5431.31640679188	3451.55030922969	6880.02832948602
BB23	18231.7404591178	3079.07177280514	5067.67748204412	8460.76105452585	4774.92981128617	8030.82084611036
BB24	95610.7120609431	12118.2696316277	6056.77334578999	5867.2700778771	5212.86291207678	6012.31952319879
BB25	59000.3943606778	7788.45456104485	6056.77334578999	7384.30610725739	3451.55030922969	7743.72643850288
BB26	51709.1056265733	2806.81041192628	5263.5629416912	6519.00245327666	4774.92981128617	8603.89431201518
BB33	70376.4147571293	31099.245707942	20870.4089346806	16511.1828301142	6952.14891157651	2184.0235871413
BB34	234441.288160375	89962.7582706057	31849.8399060026	64874.4898692702	6735.70354200511	10883.0760027195
BB36	445772.752932839	126535.37168642	42593.8124603325	129712.543125565	9745.93732243139	7456.24060079333
BB37	41228.3383831265	17190.20803644	8938.33676054417	18393.4044106931	3673.24816179584	7743.72643850288
BB38	19457.1058086314	9043.9137480305	6864.33923169716	10599.2188672872	3451.55030922969	7743.72643850288
BB39	55338.4793180631	29977.9531252986	12835.6388462012	17348.6483132935	6084.79589579673	7168.34710127515
BB43	11134.465387089	7478.66980358814	4486.26262891485	22551.8599255666	4335.51480583334	5139.97100236364
BB44	41033.764989039	15814.7559264841	6864.33923169716	13989.0358344963	3673.24816179584	2783.14829423242
BB45	141374.294513184	46725.4236643505	19457.1058086314	46836.7965819618	3229.32800049687	7743.72643850288
BB46	77962.7304290895	17709.9373005051	11080.1441024069	18184.6315018995	1882.26823666733	5139.97100236364
BB47	510044.933373847	183777.592707339	35638.0686475042	116475.601827246	7600.03343251484	8317.53883161759
BB48	154331.018851331	68496.5786931533	25186.4418974165	30174.3847653232	5212.86291207678	6012.31952319879
BB49	213393.219019166	86941.1430963762	29853.7111238919	52672.8916277434	8675.42807711452	5139.97100236364
BB50	39675.2717556059	13614.3046776706	6458.84627022736	11024.9022457218	6302.03650605272	8030.82084611036
BB51	17017.4336227897	6864.33923169716	4104.17556924074	7168.34710127515	4994.07267098302	3377.53628855491
BB53	121789.957512507	32791.4573885915	14850.1130852048	39148.1652170045	4115.20222080752	7168.34710127515
BB54	65586.2774385473	15132.9755711688	8938.33676054417	14410.480029481	3229.32800049687	5431.31640679188
BB55	147139.518699675	43572.8047133402	14399.0511152754	40973.8041231468	2108.73703232234	4262.12400045054
BB56	537229.776298812	192622.932457809	62693.3639592712	130878.053228743	8675.42807711452	4262.12400045054
BB59	154331.018851331	36785.5372638849	13057.4792303655	12721.8391681723	2783.14829423242	3377.53628855491
BB62	148296.28274094	37553.2276981341	18057.5783641131	16511.1828301142	5431.31640679188	5722.08883873294
BB65	28121.7697426447	18406.1281421302	10001.4649997267	11024.9022457218	1882.26823666733	5431.31640679188
BB67	392225.270887469	82863.0921426347	25429.3605988125	98476.9231521366	4555.41691939217	4555.41691939217
BB68	90179.1203048195	21582.0086642842	8517.72962958827	36912.5585156869	4115.20222080752	964.5233751467
BB69	451419.800381006	126308.84495361	34875.8501033716	91402.0507798134	9745.93732243139	7456.24060079333
BB70	534475.197506619	171443.620213299	44161.6373758426	132043.182365108	13567.1248722733	5431.31640679188
BB71	470853.325761946	151541.707358614	42593.8124603325	125824.710294753	11237.5163495634	2184.0235871413
BB72	369082.445560283	120663.742302293	50506.8260175639	122711.271316645	10599.2188672872	3377.53628855491
BB73	152470.711839201	49507.874658672	28615.1755454552	35487.3247797851	3673.24816179584	8603.89431201518
BB74	36211.1874495595	12283.3186787858	11080.1441024069	14410.480029481	3006.5423344927	5139.97100236364
BB75	90395.5526571024	21403.8064715513	8517.72962958827	28327.5380181824	3673.24816179584	4555.41691939217
BB76	75211.1418512226	24097.2615628974	7478.66980358814	23380.000155622	2783.14829423242	2484.25078702169
BB77	608659.883775406	157127.174084608	29357.4450397845	128935.322929551	7384.30610725739	4555.41691939217
BB78	548819.824518997	123143.278835012	33358.1973531197	129712.543125565	12933.3488186236	4848.01765184336
BB79	94738.7807308405	22117.8073463416	8938.33676054417	28943.6311808681	6302.03650605272	2484.25078702169
BB80	69540.0815244518	23014.7090219613	14850.1130852048	23173.0675637993	3229.32800049687	3673.24816179584
BB81	80727.5351070818	25004.4606864972	20162.0801752645	15462.1423609394	4115.20222080752	7456.24060079333
BB82	53721.31282668	13781.9613764484	13279.8311885295	20060.5416966293	5212.86291207678	4848.01765184336
BB83	23014.7090219613	5956.808365677	5067.67748204412	13355.9895172121	6952.14891157651	4848.01765184336
BB84	54529.0842275438	20338.8512282924	6864.33923169716	27505.3124814504	3006.5423344927	3080.86945633403
BB85	373275.990289308	110815.470879069	25429.3605988125	122321.888923754	4994.07267098302	6880.02832948602
BB86	96047.0824702083	24459.5959457604	8727.69005925535	20684.3851807588	2783.14829423242	3080.86945633403
BB87	110815.470879069	31474.2398070327	12614.3164685197	24000.3970955163	4115.20222080752	4262.12400045054
BB89	134269.505068011	43768.96327745	26648.6307615508	25445.7293630646	5212.86291207678	7456.24060079333
BB90	530071.870346517	117517.934066914	43899.8018549713	149283.429310351	10599.2188672872	6012.31952319879
BB91	82007.9638382379	21225.8049657551	7685.00411420716	32017.0877812783	5867.2700778771	6012.31952319879
BB92	296027.234288954	85220.8386486963	19457.1058086314	158164.963473495	6302.03650605272	4262.12400045054
BB93	101304.231776308	39288.2757533592	10863.2206554491	38538.9306267059	2559.09319113468	8030.82084611036
BB94	51508.4602219253	17190.20803644	6458.84627022736	21722.601358949	494.246953267162	2783.14829423242
BB97	111260.633385218	48710.6716336649	25186.4418974165	25445.7293630646	6735.70354200511	6302.03650605272
BB98	88666.0696814225	25916.1397654349	16672.5982119313	25445.7293630646	6519.00245327666	6880.02832948602
BB99	121789.957512507	54529.0842275438	11953.524438726	44616.2698031889	3894.45550573382	8030.82084611036
BCW01	2386487.73292245	75422.3254375806	22583.5938466866	18685.5406076101	3894.45550573382	7513.76984306687
BCW02	173522.706610376	12780.2594335195	7478.66980358814	9574.95873446977	5212.86291207678	27628.7032080816
BCW03	26942.3965636399	12946.4946936206	5896.93799817331	14326.2278159081	7384.30610725739	5605.84654749599
BCW04	61376.8375292149	21225.8049657551	5539.4638264205	24826.6806126902	7600.03343251484	9232.66282743678
BCW05	1246584.17550673	187595.689893619	29754.3678970376	360973.799975823	24826.6806126902	8889.90022750322
BCW06	202006.296475298	30724.8629283826	12217.2627897411	63359.2350130262	7600.03343251484	10087.566328731
BCW07	29010.7323517251	18406.1281421302	5185.08815334312	11449.9828496712	10812.1374800346	6475.63075623443
BCW08	12085.2961881249	7943.97919443324	7478.66980358814	8202.89589434906	6735.70354200511	7858.61030682023
BCW09	890912.91813486	62899.411840091	26501.9118456051	111790.825547891	10386.1430871192	8202.89589434906
BCW10	162974.092012705	15473.3572251925	10001.4649997267	32548.6898731401	6952.14891157651	7341.13307388422
BCW11	21867.5465881169	9202.59222254444	5302.85997845417	14326.2278159081	5212.86291207678	5431.31640679188
BCW12	36862.2094902206	14286.5816668983	6864.33923169716	13482.6853125574	8245.89384621439	7168.34710127515
BCW13	192191.322405778	35256.6804400861	12879.965690891	53435.8053362545	5649.44768102435	6822.31188513865
BCW14	2032281.77405086	171207.575517021	48272.96007407	438230.957125819	26888.051957656	14494.7141608487
BCW15	180350.459454593	13949.8947215026	5539.4638264205	52954.0119944033	10812.1374800346	9745.93732243139
BCW16	21154.6608298091	10485.0175286668	5067.67748204412	11280.0213621756	5867.2700778771	6475.63075623443
BCW17	82863.0921426347	14793.627596556	18755.5740535588	28450.7956761496	6084.79589579673	9403.86796698692
BCW18	32602.8373228319	7170.61340875723	6864.33923169716	12975.6354458596	4774.92981128617	5954.31533810965
BCW19	40567.299090565	5956.808365677	10388.0605507572	26311.4725497949	5212.86291207678	6995.40806054365
BCW20	154936.274820877	19809.1682964791	10776.6146056298	37929.3422032559	6952.14891157651	4731.05742233522
BCW21	119224.2626241	16844.8964248611	10130.10924937	36790.4758903445	9104.18254886758	5605.84654749599
BCW22	2020144.40492659	182348.559251259	49228.6543748797	437785.051508558	32017.0877812783	6822.31188513865
BCW23	143077.543282723	20162.0801752645	9616.88288745226	44737.4923416475	10386.1430871192	9061.34103740659
BCW24	16672.5982119313	14624.3466014237	12349.4227065788	8030.82084611036	3006.5423344927	6128.26648571543
BCW25	100381.503783299	12614.3164685197	10517.3635761371	15672.1541255548	8675.42807711452	6302.03650605272
BCW26	53237.4367305673	8099.91726070488	13815.5259922729	12467.8568415917	4335.51480583334	7686.26108625199
BW01	3079.07177280514	3726.85086130947	2627.25055557648	4994.07267098302	6591.26511389237	6591.26511389237
BW02	1883.62385535483	4104.17556924074	3170.5700484874	2559.09319113468	4848.01765184336	4555.41691939217
BW03	4056.74291396582	4872.81221876285	2273.16019240272	4555.41691939217	6880.02832948602	5722.08883873294
BW04	4342.44184910028	4294.64354189669	5658.28471764599	4555.41691939217	10030.6580477313	8030.82084611036
BW05	2671.98922950531	4294.64354189669	4486.26262891485	3006.5423344927	4555.41691939217	6880.02832948602
BW06	4630.71056806774	4678.99675261483	6257.37243174712	2783.14829423242	6880.02832948602	6302.03650605272
BW07	3633.30333156149	3540.08085856838	4294.64354189669	4555.41691939217	6880.02832948602	3673.24816179584
BW08	2142.22261192336	3540.08085856838	2627.25055557648	1196.16369729411	3673.24816179584	3673.24816179584
BW09	3633.30333156149	3170.5700484874	3914.89744259055	4774.92981128617	8603.89431201518	8317.53883161759
BW10	5509.8121674369	4294.64354189669	2806.81041192628	3229.32800049687	3968.08755265501	6880.02832948602
BW11	4630.71056806774	4486.26262891485	4104.17556924074	5431.31640679188	8317.53883161759	2783.14829423242
BW12	4056.74291396582	4104.17556924074	2449.33830504359	5867.2700778771	9175.56864034164	6591.26511389237
BW13	4630.71056806774	4872.81221876285	7273.10358357974	6084.79589579673	2484.25078702169	5722.08883873294
BW14	3633.30333156149	4294.64354189669	5263.5629416912	3229.32800049687	8030.82084611036	6880.02832948602
BW15	2405.12760301445	2449.33830504359	6056.77334578999	4774.92981128617	8030.82084611036	7168.34710127515
BW16	2538.08329811971	4486.26262891485	3726.85086130947	1882.26823666733	5431.31640679188	3377.53628855491
BW17	4486.26262891485	2987.94025746926	5460.44076253933	4335.51480583334	7168.34710127515	5722.08883873294
BW18	8727.69005925535	5460.44076253933	2987.94025746926	4555.41691939217	2783.14829423242	6591.26511389237
BW19	29605.4372693922	4104.17556924074	5067.67748204412	10812.1374800346	6012.31952319879	2783.14829423242
BW20	7633.34936472273	2987.94025746926	1422.19264090555	7384.30610725739	4848.01765184336	3673.24816179584
BW21	7478.66980358814	4872.81221876285	6257.37243174712	6084.79589579673	3377.53628855491	3673.24816179584
BW22	25004.4606864972	7892.09142036748	5857.0700492999	20060.5416966293	7743.72643850288	6880.02832948602
BW23	325707.383467252	83148.4012879225	26893.4053369355	186429.627782236	19574.8382285132	11449.9828496712
BW24	33547.4019017716	15985.8316301031	7685.00411420716	26064.22559089	6302.03650605272	5431.31640679188
BWd01	28862.3124096313	9680.83765029827	4678.99675261483	24207.0645342806	1196.16369729411	3377.53628855491
BWd02	7943.97919443324	1504.7574688656	3914.89744259055	9532.19664365385	3451.55030922969	8317.53883161759
BWd03	7017.25003300809	2538.08329811971	4294.64354189669	4555.41691939217	2334.31453429402	6012.31952319879
BWd04	10809.0808708291	2671.98922950531	4294.64354189669	5867.2700778771	3894.45550573382	6880.02832948602
BWd05	12118.2696316277	4630.71056806774	6864.33923169716	5431.31640679188	3229.32800049687	4262.12400045054
BWd06	45145.3870319145	20515.8305773994	9149.65790097391	22551.8599255666	3451.55030922969	8317.53883161759
BWd07	359148.695836526	67039.2893533029	25429.3605988125	134954.361986304	6519.00245327666	2184.0235871413
HW01	7170.61340875723	3914.89744259055	5067.67748204412	7168.34710127515	7456.24060079333	6012.31952319879
HW02	5214.49748423077	3354.63623126694	5658.28471764599	6084.79589579673	7456.24060079333	5722.08883873294
HW03	7478.66980358814	3726.85086130947	3354.63623126694	4555.41691939217	7168.34710127515	8889.90022750322
HW04	8727.69005925535	3170.5700484874	4104.17556924074	2559.09319113468	7168.34710127515	5722.08883873294
HW05	10323.49050898	3540.08085856838	941.444868567001	2108.73703232234	4555.41691939217	4262.12400045054
HW06	6559.90493713248	5460.44076253933	4104.17556924074	4774.92981128617	9175.56864034164	6012.31952319879
HW07	4486.26262891485	4104.17556924074	2806.81041192628	3229.32800049687	8889.90022750322	4262.12400045054
HW08	6559.90493713248	5067.67748204412	3914.89744259055	6084.79589579673	6591.26511389237	9745.93732243139
HW09	3914.89744259055	3726.85086130947	2806.81041192628	5867.2700778771	6012.31952319879	4848.01765184336
HW10	3079.07177280514	2806.81041192628	4872.81221876285	3451.55030922969	8317.53883161759	3377.53628855491
HW11	4486.26262891485	3914.89744259055	1259.02441870446	2783.14829423242	6302.03650605272	7456.24060079333
HW12	6106.83997751961	3726.85086130947	6661.17487499426	2783.14829423242	7456.24060079333	6591.26511389237
HW13	6711.88833486356	3540.08085856838	1587.94061265685	730.800498100415	5722.08883873294	5722.08883873294
HW14	5067.67748204412	2273.16019240272	4872.81221876285	1654.79195888141	2484.25078702169	6591.26511389237
HW15	4630.71056806774	5857.0700492999	3726.85086130947	1654.79195888141	9175.56864034164	4555.41691939217
HW16	3354.63623126694	1422.19264090555	2987.94025746926	5212.86291207678	8317.53883161759	4848.01765184336
LW01	53116.5604943261	1883.62385535483	1756.06854527894	9745.93732243139	6302.03650605272	4848.01765184336
LW02	89530.2456499553	6408.39691274201	2987.94025746926	42594.0858482027	5431.31640679188	6591.26511389237
LW03	51307.9206015446	4199.26331119371	4678.99675261483	11662.3046844727	730.800498100415	4848.01765184336
LW04	38323.0493253716	1883.62385535483	3540.08085856838	4555.41691939217	3229.32800049687	8317.53883161759
LW05	39094.970840768	4775.77133730065	5067.67748204412	5649.44768102435	2783.14829423242	5431.31640679188
LW06	67039.2893533029	4199.26331119371	6864.33923169716	5431.31640679188	3451.55030922969	3377.53628855491
LW07	25368.6013395756	5658.28471764599	5658.28471764599	3894.45550573382	6735.70354200511	5722.08883873294
LW08	51508.4602219253	457.374756110349	3914.89744259055	5867.2700778771	7384.30610725739	4555.41691939217
LW09	26099.0028969305	2012.36042681227	4294.64354189669	8675.42807711452	4335.51480583334	6012.31952319879
LW10	62281.5434051872	10485.0175286668	5658.28471764599	9959.50601417923	2559.09319113468	5431.31640679188
LW11	59000.3943606778	5807.28676459116	8308.46776743514	8460.76105452585	494.246953267162	6012.31952319879
LW12	37361.1040449696	5658.28471764599	7273.10358357974	10812.1374800346	4774.92981128617	5139.97100236364
OWW01	42789.3695089445	10971.6097804492	7478.66980358814	30174.3847653232	5431.31640679188	4262.12400045054
OWW02	20338.8512282924	11297.644199405	7685.00411420716	9532.19664365385	7600.03343251484	5722.08883873294
OWW03	11789.086148131	6559.90493713248	4678.99675261483	8245.89384621439	4774.92981128617	1578.7179258101
OWW04	14286.5816668983	5807.28676459116	3540.08085856838	6519.00245327666	2559.09319113468	652.315838262762
OWW05	14793.627596556	7324.42227953607	4872.81221876285	8030.82084611036	3894.45550573382	3968.08755265501
OWW06	19457.1058086314	7633.34936472273	6056.77334578999	9104.18254886758	5649.44768102435	6302.03650605272
OWW07	35638.0686475042	8413.01059021106	4872.81221876285	21307.5384962834	4115.20222080752	5722.08883873294
OWW08	101304.231776308	40644.9932089852	15757.7862030214	30789.066225273	9318.27983405056	5139.97100236364
OWW09	371440.525161333	73945.7317524916	22775.0642677089	216825.475909644	8460.76105452585	6591.26511389237
OWW10	33358.1973531197	7943.97919443324	5263.5629416912	27505.3124814504	3451.55030922969	8317.53883161759
OWW11	8570.15473478918	3633.30333156149	4486.26262891485	6952.14891157651	4555.41691939217	2184.0235871413
OWW12	26832.1832963145	5214.49748423077	5658.28471764599	8030.82084611036	4994.07267098302	3968.08755265501
OWW13	11134.465387089	5214.49748423077	6056.77334578999	5431.31640679188	5212.86291207678	5139.97100236364
OWW14	20162.0801752645	14286.5816668983	5857.0700492999	4774.92981128617	6302.03650605272	4555.41691939217
OWW15	8099.91726070488	4775.77133730065	3914.89744259055	4115.20222080752	6084.79589579673	4555.41691939217
OWW16	8727.69005925535	4921.43130415504	6056.77334578999	6952.14891157651	3673.24816179584	5431.31640679188
PH01	107041.434105954	18930.6292306351	2627.25055557648	4994.07267098302	5212.86291207678	3968.08755265501
PH02	555457.666672248	28491.7152615942	5857.0700492999	8245.89384621439	5431.31640679188	6591.26511389237
PH03	203938.498728573	17709.9373005051	4872.81221876285	9318.27983405056	3006.5423344927	5722.08883873294
PH04	584902.251435219	29791.6163518231	2273.16019240272	5431.31640679188	1426.15783127688	5722.08883873294
PH05	622694.173805987	31099.245707942	5658.28471764599	1426.15783127688	5649.44768102435	10030.6580477313
PH06	196224.757197859	7017.25003300809	5067.67748204412	9104.18254886758	5212.86291207678	4555.41691939217
PH07	544124.581082814	39868.9619274035	5857.0700492999	6952.14891157651	5212.86291207678	3968.08755265501
PH08	549648.963168452	36020.0103659141	5658.28471764599	9104.18254886758	4774.92981128617	4555.41691939217
PH09	205147.38671961	18755.5740535588	4678.99675261483	7600.03343251484	5212.86291207678	4555.41691939217
PH10	598582.203292902	33736.7510634066	6661.17487499426	7600.03343251484	4774.92981128617	8030.82084611036
PH11	634234.384872482	31661.9644350647	3540.08085856838	8460.76105452585	1426.15783127688	6591.26511389237
PH12	252760.612256772	14963.1713111386	4104.17556924074	6084.79589579673	3229.32800049687	3968.08755265501
PH13	675273.498076388	33358.1973531197	2273.16019240272	2108.73703232234	7815.53613090606	8317.53883161759
PH14	692640.91296598	32602.8373228319	3170.5700484874	7815.53613090606	4774.92981128617	3080.86945633403
PH15	581280.095952581	46132.048319762	2098.81335110841	5649.44768102435	7600.03343251484	6012.31952319879
PH16	651456.610246666	35066.1952624731	4294.64354189669	8889.90022750322	2559.09319113468	7168.34710127515
PH17	602498.592665205	31474.2398070327	4104.17556924074	11237.5163495634	6952.14891157651	6591.26511389237
PH18	224128.520882297	23555.1430805673	3914.89744259055	7600.03343251484	4555.41691939217	7456.24060079333
PH19	175699.909198552	21582.0086642842	2273.16019240272	7384.30610725739	3006.5423344927	5431.31640679188
PH20	565989.55064041	26282.0396936538	3170.5700484874	5867.2700778771	5867.2700778771	4262.12400045054
PH21	661933.104799401	35828.9705874122	3540.08085856838	6519.00245327666	5649.44768102435	4555.41691939217
PH22	976435.328563657	87156.5075145536	28368.3273799124	150249.733692597	6519.00245327666	2484.25078702169
PH24	747686.91056645	62693.3639592712	11080.1441024069	63279.4481644293	3673.24816179584	8603.89431201518
SAC02	3049786.62152005	259989.893074711	93215.5169357992	606938.643252479	20892.1785408718	11874.4846795651
SAC03	2916327.22442672	239620.97570898	84791.4926498301	613729.791718635	22966.0671015487	8030.82084611036
SAC04	1546684.92567044	198630.967499723	66831.4527584052	581952.336343201	29764.3421259057	10812.1374800346
SAC05	2865107.74944901	370130.229847643	78812.0476912865	529461.057152118	124268.348819673	9959.50601417923
SAC06	2793677.55987716	293486.825040069	92780.9147339006	588937.699630097	45827.9566895109	12933.3488186236
SAC07	2240888.95926136	246550.840557038	78174.9428423541	596471.129727919	34875.8711771552	13778.1396509332
SAC08	1393847.34407764	210963.415609391	74367.2118370616	509890.090078719	23586.8655216468	17348.6483132935
SAC09	2594180.89456575	295010.714872546	86941.1430963762	419972.169891767	60284.7298127769	10599.2188672872
SAC10	2739321.59225581	256745.768395289	93650.3936997689	583423.193766908	31812.5394053752	15041.8029211654
SAC11	2615337.20025144	202730.580344764	78174.9428423541	470478.782112188	20892.1785408718	7168.34710127515
SAC12	2232532.36160752	228049.777296902	90179.1203048195	623452.856285695	32017.0877812783	11237.5163495634
SAC13	2572025.95884493	247294.906214452	95828.8636303837	592429.238561224	81541.9691054417	12298.4299264461
SAC14	3993437.62286925	182110.534060391	48909.8079339897	61882.5758700645	28943.6311808681	4774.92981128617
SAC15	1492757.96252803	127442.027192741	51107.4870667576	134954.361986304	20060.5416966293	10599.2188672872
SAC16	235673.154880607	53721.31282668	20338.8512282924	66866.273150209	17975.7705501177	14410.480029481
SNG01	25733.4511918303	6864.33923169716	9361.64208507319	32630.4463918547	6012.31952319879	8245.89384621439
SNG02	16844.8964248611	7892.09142036748	17536.4615750039	9959.50601417923	6012.31952319879	4774.92981128617
SP10	11461.1428065873	3540.08085856838	5214.49748423077	4115.20222080752	6591.26511389237	6952.14891157651
SP11	11789.086148131	5857.0700492999	6711.88833486356	3894.45550573382	6591.26511389237	6519.00245327666
SP12	23916.3699756772	4872.81221876285	35828.9705874122	9959.50601417923	7168.34710127515	6084.79589579673
SP13	5214.49748423077	3914.89744259055	8256.26294041053	8030.82084611036	7743.72643850288	7168.34710127515
SP14	4199.26331119371	4872.81221876285	7478.66980358814	21930.0232932104	6012.31952319879	5212.86291207678
SP15	3773.74464726518	6458.84627022736	3914.89744259055	2334.31453429402	6302.03650605272	8030.82084611036
SP16	7170.61340875723	3914.89744259055	4056.74291396582	7815.53613090606	7168.34710127515	7384.30610725739
SP17	7170.61340875723	5460.44076253933	3773.74464726518	6952.14891157651	6880.02832948602	5867.2700778771
WEL01	708350.819109809	38130.3958484624	3726.85086130947	10386.1430871192	3451.55030922969	4848.01765184336
WEL02	361498.103456167	18231.7404591178	4486.26262891485	6519.00245327666	5212.86291207678	8030.82084611036
WEL03	587411.679245059	29047.8534297105	5857.0700492999	6519.00245327666	5649.44768102435	7456.24060079333
WEL04	691785.385357499	35447.3050841915	4678.99675261483	11024.9022457218	6302.03650605272	4848.01765184336
WEL05	694637.700409817	30724.8629283826	3914.89744259055	8889.90022750322	6952.14891157651	4262.12400045054
WEL06	732147.852017216	34115.880861771	3726.85086130947	6519.00245327666	4994.07267098302	6302.03650605272
WEL07	646368.152333055	27383.8586832981	787.703070371494	5431.31640679188	3006.5423344927	6012.31952319879
WEL08	601659.075345628	42203.0632920831	5658.28471764599	17975.7705501177	4774.92981128617	8603.89431201518
WEL09	707492.687870601	32414.3649132388	2449.33830504359	6519.00245327666	3451.55030922969	6880.02832948602
WEL10	248287.465423066	16328.7259644266	2449.33830504359	6519.00245327666	3229.32800049687	6591.26511389237
WEL11	613146.138443751	31849.8399060026	3540.08085856838	6519.00245327666	4335.51480583334	4555.41691939217
WEL12	630009.029603989	20162.0801752645	4678.99675261483	11024.9022457218	4774.92981128617	4555.41691939217
WEL13	571265.492601912	21939.0102877585	1422.19264090555	12510.2003200692	4555.41691939217	2184.0235871413
WEL14	695779.071027674	30164.4468744967	4294.64354189669	8460.76105452585	4994.07267098302	6880.02832948602
WEL15	633107.249639685	28491.7152615942	3354.63623126694	7384.30610725739	3006.5423344927	5431.31640679188
WEL16	609781.029004348	37553.2276981341	3914.89744259055	6084.79589579673	3006.5423344927	11733.0469730614
WEL17	663634.123053367	35256.6804400861	5067.67748204412	4335.51480583334	4994.07267098302	8317.53883161759
WEL18	206115.192426358	8570.15473478918	1756.06854527894	4774.92981128617	3673.24816179584	3673.24816179584
WEL19	576269.848328165	30911.9775667495	1422.19264090555	3894.45550573382	5649.44768102435	3080.86945633403
WEL20	619602.918723942	31286.6666774059	4294.64354189669	10599.2188672872	5431.31640679188	3673.24816179584
WEL22	644673.20233481	32037.8655705147	5460.44076253933	6302.03650605272	4115.20222080752	7743.72643850288
WEL23	605578.177125782	33358.1973531197	5263.5629416912	4994.07267098302	2334.31453429402	5139.97100236364
WEL24	649194.406395928	48710.6716336649	5263.5629416912	8889.90022750322	2783.14829423242	7456.24060079333
WEL25	148527.782553682	17883.6434415785	7478.66980358814	27093.8626969086	5431.31640679188	8317.53883161759
WEL26	215826.774825841	19985.5187483976	3540.08085856838	31403.2974145016	3673.24816179584	5139.97100236364
WF01	11624.9578755294	5361.8794821301	5263.5629416912	9532.19664365385	4555.41691939217	2484.25078702169
WF02	7633.34936472273	2806.81041192628	2098.81335110841	4335.51480583334	3006.5423344927	6880.02832948602
WF04	7017.25003300809	3914.89744259055	3170.5700484874	5649.44768102435	3451.55030922969	4848.01765184336
WF05	31099.245707942	27568.0869543197	17363.2179249153	13567.1248722733	4774.92981128617	6591.26511389237
WF06	14963.1713111386	8885.61140201036	6661.17487499426	6952.14891157651	2108.73703232234	6302.03650605272
WF07	25733.4511918303	19457.1058086314	10646.8822330769	13778.1396509332	1882.26823666733	6591.26511389237
WGP01	52311.6735607231	21939.0102877585	9149.65790097391	18393.4044106931	5431.31640679188	3968.08755265501
WGP02	26099.0028969305	17190.20803644	10001.4649997267	15882.0626101185	4994.07267098302	8889.90022750322
WGP03	333186.390042324	93432.9210558276	19926.7117556105	155270.874031438	4994.07267098302	3968.08755265501
WGP04	83505.2241949049	32602.8373228319	14850.1130852048	27299.6160501229	6519.00245327666	2484.25078702169
WGP05	38130.3958484624	24459.5959457604	10863.2206554491	21307.5384962834	10386.1430871192	10030.6580477313
WGP06	44554.7848614983	21760.4103342974	8727.69005925535	18602.0903488084	4555.41691939217	3968.08755265501
WGP07	55541.0797498548	13113.0195072771	6661.17487499426	21099.896045603	3006.5423344927	4262.12400045054
WGP08	47716.6494681842	16844.8964248611	13502.6884602715	20268.5676035514	3894.45550573382	9175.56864034164
WGP09	102844.640361013	36785.5372638849	18289.8446990039	21722.601358949	3673.24816179584	5139.97100236364
WGP10	10646.8822330769	86080.4089149921	12393.5187092706	7600.03343251484	4115.20222080752	10030.6580477313
WGP11	21760.4103342974	19457.1058086314	4486.26262891485	14410.480029481	4555.41691939217	4555.41691939217
WGP12	25550.9380788702	66623.7036518534	10863.2206554491	12933.3488186236	4335.51480583334	1578.7179258101
WGP13	41228.3383831265	24641.0367491118	11297.644199405	19852.4365535127	6735.70354200511	6302.03650605272
WGP14	13279.8311885295	9361.64208507319	6864.33923169716	9104.18254886758	3451.55030922969	2484.25078702169
WGP15	14793.627596556	4486.26262891485	6056.77334578999	8889.90022750322	3229.32800049687	5139.97100236364
WGP16	10971.6097804492	2538.08329811971	5263.5629416912	7384.30610725739	4774.92981128617	7168.34710127515
WGP17	11953.524438726	6864.33923169716	4104.17556924074	8889.90022750322	4994.07267098302	5722.08883873294
WGP18	7788.45456104485	1381.15012415279	3540.08085856838	10599.2188672872	730.800498100415	3968.08755265501
WGP19	24641.0367491118	6864.33923169716	5460.44076253933	15462.1423609394	2108.73703232234	4555.41691939217
WGP20	29233.5550748816	9361.64208507319	4104.17556924074	19227.636686823	6735.70354200511	4555.41691939217
WiW01	30911.9775667495	17190.20803644	9043.9137480305	10599.2188672872	5212.86291207678	4994.07267098302
WiW02	21760.4103342974	7788.45456104485	7633.34936472273	8889.90022750322	5431.31640679188	5212.86291207678
WiW03	18057.5783641131	11624.9578755294	6559.90493713248	8675.42807711452	4335.51480583334	2783.14829423242
WiW04	26648.6307615508	8256.26294041053	5214.49748423077	7815.53613090606	4555.41691939217	2783.14829423242
WiW05	124272.588081645	5214.49748423077	6106.83997751961	8460.76105452585	6302.03650605272	1882.26823666733
WiW06	41423.0362055741	15473.3572251925	11624.9578755294	12086.5255540573	5649.44768102435	6084.79589579673
WiW07	53519.6257507121	20515.8305773994	6711.88833486356	20060.5416966293	2334.31453429402	8245.89384621439
WiW08	38515.834040469	32602.8373228319	7788.45456104485	10386.1430871192	7815.53613090606	4555.41691939217
WiW09	26099.0028969305	8099.91726070488	7943.97919443324	8460.76105452585	3006.5423344927	5867.2700778771
WiW10	87803.0327791497	5509.8121674369	5807.28676459116	12510.2003200692	3894.45550573382	4994.07267098302
WiW11	17190.20803644	6864.33923169716	4630.71056806774	6302.03650605272	3673.24816179584	4774.92981128617
WiW12	93867.9347515578	5509.8121674369	3216.45428574537	6302.03650605272	5431.31640679188	2783.14829423242
WiW13	1583948.39862538	3914.89744259055	29047.8534297105	4994.07267098302	1882.26823666733	3006.5423344927
WiW14	145522.117341617	8413.01059021106	7788.45456104485	17557.7800958566	4335.51480583334	6084.79589579673
WiW15	372227.003038003	63518.1032725095	25550.9380788702	124852.067766469	6302.03650605272	8889.90022750322
WiW16	60023.1641230261	15985.8316301031	9202.59222254444	18602.0903488084	4115.20222080752	6084.79589579673
WiW17	90395.5526571024	11297.644199405	11953.524438726	14199.8153412651	6735.70354200511	5649.44768102435
WiW18	1397296.72566471	60637.9633053657	25733.4511918303	102791.195526228	4774.92981128617	7815.53613090606
WiW19	91912.5377721074	8099.91726070488	4921.43130415504	13778.1396509332	2108.73703232234	6084.79589579673
WiW20	41033.764989039	5067.67748204412	4199.26331119371	6735.70354200511	4335.51480583334	3673.24816179584
WiW21	87803.0327791497	7788.45456104485	6711.88833486356	7168.34710127515	2559.09319113468	5649.44768102435
WiW22	31661.9644350647	5807.28676459116	4921.43130415504	8245.89384621439	4335.51480583334	6084.79589579673
WiW23	347433.049050129	26832.1832963145	10485.0175286668	13567.1248722733	4774.92981128617	6519.00245327666
WiW24	42007.8719917449	9840.97449444045	7478.66980358814	8460.76105452585	2783.14829423242	7384.30610725739
WiW25	25550.9380788702	9680.83765029827	7324.42227953607	9318.27983405056	7168.34710127515	6302.03650605272
WiW26	70795.0876242465	10323.49050898	6864.33923169716	15672.1541255548	3006.5423344927	5649.44768102435
WiW27	19105.9038919817	2671.98922950531	4630.71056806774	9318.27983405056	2559.09319113468	7815.53613090606
WiW28	14286.5816668983	5509.8121674369	3773.74464726518	7600.03343251484	4994.07267098302	6084.79589579673
WiW29	36785.5372638849	33169.1380150838	10646.8822330769	19852.4365535127	4335.51480583334	8889.90022750322
WiW30	20515.8305773994	10323.49050898	4342.44184910028	7815.53613090606	6084.79589579673	4115.20222080752
WiW31	35066.1952624731	8256.26294041053	7324.42227953607	7384.30610725739	1882.26823666733	5867.2700778771
WiW32	43376.7656594096	9043.9137480305	9361.64208507319	8030.82084611036	5431.31640679188	9745.93732243139
WiW33	23735.6634727574	54124.994465369	6257.37243174712	10599.2188672872	13355.9895172121	7168.34710127515
WiW34	16844.8964248611	21582.0086642842	5509.8121674369	9318.27983405056	11449.9828496712	5649.44768102435
WiW35	14624.3466014237	4342.44184910028	4486.26262891485	6302.03650605272	3673.24816179584	5212.86291207678
WiW36	12283.3186787858	14286.5816668983	4775.77133730065	6302.03650605272	9318.27983405056	6519.00245327666
WiW37	26648.6307615508	33926.2442457419	8727.69005925535	9959.50601417923	4115.20222080752	8460.76105452585
WiW38	21582.0086642842	8570.15473478918	4486.26262891485	8245.89384621439	4994.07267098302	3894.45550573382
WiW39	19281.3965675471	6559.90493713248	6711.88833486356	8889.90022750322	1882.26823666733	6952.14891157651
WiW40	22296.800346919	11789.086148131	6559.90493713248	12086.5255540573	4115.20222080752	8675.42807711452
WiW41	20338.8512282924	45934.485340352	8099.91726070488	10599.2188672872	3229.32800049687	9318.27983405056
WiW42	14624.3466014237	11134.465387089	4199.26331119371	6519.00245327666	4994.07267098302	8030.82084611036
WiW43	11789.086148131	5067.67748204412	4630.71056806774	6084.79589579673	2108.73703232234	5867.2700778771
WiW44	11624.9578755294	8885.61140201036	4630.71056806774	8030.82084611036	6084.79589579673	7384.30610725739
WiW45	37937.8740929111	23014.7090219613	6711.88833486356	13989.0358344963	3229.32800049687	7384.30610725739
WiW46	201764.946582135	18930.6292306351	9043.9137480305	33855.9028331045	4774.92981128617	3673.24816179584
WiW47	45934.485340352	8727.69005925535	7633.34936472273	10172.9066752902	5212.86291207678	6084.79589579673
WiW48	17190.20803644	7943.97919443324	3914.89744259055	12298.4299264461	4335.51480583334	5431.31640679188
WiW49	52915.1828825268	16328.7259644266	8256.26294041053	33855.9028331045	5649.44768102435	8889.90022750322
WiW50	54731.2814640588	36977.2583225736	4630.71056806774	9104.18254886758	11449.9828496712	8889.90022750322
WiW51	13279.8311885295	8413.01059021106	4199.26331119371	9104.18254886758	3894.45550573382	6952.14891157651
WiW52	19281.3965675471	6864.33923169716	4630.71056806774	13355.9895172121	1196.16369729411	8675.42807711452
WiW53	200076.593719976	26465.2492728596	13279.8311885295	98280.6571293485	5212.86291207678	6519.00245327666
WiW54	40450.7956927293	5214.49748423077	6559.90493713248	16930.1057183409	2559.09319113468	4774.92981128617
WiW55	21048.0053727014	6106.83997751961	8885.61140201036	10172.9066752902	5867.2700778771	3673.24816179584
WiW56	20162.0801752645	7478.66980358814	5956.808365677	10812.1374800346	3451.55030922969	2334.31453429402
WiW57	26099.0028969305	8099.91726070488	5214.49748423077	9745.93732243139	3894.45550573382	6735.70354200511
WP01	32980.2244907214	11789.086148131	4056.74291396582	13778.1396509332	2334.31453429402	5867.2700778771
WP02	51909.8565160274	13279.8311885295	5361.8794821301	25858.120690197	9318.27983405056	6519.00245327666
WP03	46527.5178374212	11297.644199405	6711.88833486356	21930.0232932104	6952.14891157651	8460.76105452585
WP04	195023.145712683	33926.2442457419	9202.59222254444	65273.0240145061	9532.19664365385	6519.00245327666
WP05	282597.196057629	44358.1521368682	14793.627596556	71240.6303207971	12298.4299264461	6952.14891157651
WP06	109481.438394953	32602.8373228319	9043.9137480305	46836.7965819618	9532.19664365385	9959.50601417923
WP07	189748.016980809	25550.9380788702	10001.4649997267	52271.1954457516	5431.31640679188	3673.24816179584
WP08	951382.172319905	116621.209115716	47716.6494681842	346030.254382576	15252.0258096315	4994.07267098302
WP09	200558.78412539	37361.1040449696	11461.1428065873	68259.2224275536	3894.45550573382	4115.20222080752
WP10	567099.724023373	81794.3698075972	26282.0396936538	216253.488988705	10172.9066752902	8460.76105452585
WP11	311331.12388663	45934.485340352	17883.6434415785	96513.6115599617	9959.50601417923	4994.07267098302
WP12	2793333.08105827	335512.11531062	80301.3338190637	612812.230848596	53275.2253480061	13355.9895172121
WP13	2924991.26112282	285377.596183646	70167.2046112879	612445.192380326	39148.1652170045	10172.9066752902
WP14	842405.769207653	80727.5351070818	30351.0968911496	294532.246480562	10599.2188672872	7600.03343251484
WP15	2489430.54095101	165320.894685121	61048.2994047797	344530.863559389	12086.5255540573	8889.90022750322
WP16	2805048.58473094	239127.013163986	78174.9428423541	481962.697930157	22966.0671015487	13989.0358344963
WYC01	220460.758489576	43899.8018549713	19457.1058086314	40973.8041231468	10883.0760027195	8889.90022750322
WYC03	53318.041545443	10215.9953264995	10215.9953264995	10599.2188672872	964.5233751467	3968.08755265501
WYC04	44751.5351698939	10215.9953264995	7068.32122683791	12510.2003200692	2184.0235871413	1882.26823666733
WYC05	19457.1058086314	4678.99675261483	3354.63623126694	5431.31640679188	3673.24816179584	6591.26511389237
WYC06	13279.8311885295	4486.26262891485	6661.17487499426	5431.31640679188	8030.82084611036	5139.97100236364
WYC07	12946.4946936206	1259.02441870446	4294.64354189669	6084.79589579673	6302.03650605272	4555.41691939217
WYC08	10001.4649997267	3540.08085856838	4872.81221876285	9532.19664365385	5722.08883873294	6591.26511389237
WYC09	53116.5604943261	9149.65790097391	5658.28471764599	15252.0258096315	8603.89431201518	5431.31640679188
WYC10	493936.050869817	61048.2994047797	25429.3605988125	60084.8905125434	8889.90022750322	5431.31640679188
WYC11	104388.179739452	41293.223853041	13502.6884602715	37319.3938382162	1882.26823666733	5431.31640679188
WYC12	78812.0476912865	18522.5111525537	6257.37243174712	8889.90022750322	4555.41691939217	5431.31640679188
WYC13	101304.231776308	8517.72962958827	2449.33830504359	3451.55030922969	5722.08883873294	2783.14829423242
WYC16	81367.4084029129	12835.6388462012	6257.37243174712	16930.1057183409	9745.93732243139	3968.08755265501
WYC17	14793.627596556	6056.77334578999	16443.2421283929	8030.82084611036	7456.24060079333	8317.53883161759
WYC18	34875.8501033716	6458.84627022736	10215.9953264995	7384.30610725739	2783.14829423242	4848.01765184336
WYC19	19809.1682964791	3170.5700484874	2987.94025746926	3673.24816179584	5722.08883873294	6880.02832948602
WYC20	52915.1828825268	7685.00411420716	4678.99675261483	6519.00245327666	8317.53883161759	8889.90022750322
WYC21	39094.970840768	4104.17556924074	7478.66980358814	5212.86291207678	2783.14829423242	5722.08883873294
WYC22	61664.5039133386	12835.6388462012	21819.9216791286	11024.9022457218	1578.7179258101	8317.53883161759
WYC23	18406.1281421302	3354.63623126694	6257.37243174712	10172.9066752902	6302.03650605272	5722.08883873294
WYC24	59818.4199860927	15076.345334248	21582.0086642842	10812.1374800346	7743.72643850288	6012.31952319879
WYC25	32791.4573885915	6458.84627022736	15076.345334248	7384.30610725739	4262.12400045054	6012.31952319879
WYC27	33547.4019017716	3726.85086130947	2098.81335110841	2334.31453429402	7456.24060079333	4555.41691939217
WYC28	542744.668502116	38194.5990623325	6661.17487499426	12086.5255540573	7456.24060079333	6012.31952319879
WYC29	78387.2332931388	7068.32122683791	9574.27832997184	7815.53613090606	2484.25078702169	4848.01765184336
WYC30	18057.5783641131	6056.77334578999	31349.1741800725	5431.31640679188	1272.99494680496	8030.82084611036
WYC31	19105.9038919817	6056.77334578999	9574.27832997184	8675.42807711452	3968.08755265501	5139.97100236364
WYC32	20693.0169108124	4678.99675261483	9361.64208507319	4555.41691939217	3968.08755265501	8030.82084611036
WYC33	448191.737135039	23735.6634727574	7273.10358357974	8675.42807711452	2783.14829423242	4262.12400045054
WYC34	38323.0493253716	7273.10358357974	6056.77334578999	6084.79589579673	4848.01765184336	7743.72643850288
WYC35	15814.7559264841	2987.94025746926	4678.99675261483	2559.09319113468	6880.02832948602	5722.08883873294
WYC36	55338.4793180631	7685.00411420716	5263.5629416912	5649.44768102435	5722.08883873294	3673.24816179584
WYC37	211449.074597518	11297.644199405	3726.85086130947	5867.2700778771	4262.12400045054	5431.31640679188
WYC38	70585.7091555266	21819.9216791286	13057.4792303655	26476.256426751	7168.34710127515	4555.41691939217
WYC39	320306.002273264	76620.5407287831	19691.7192115461	18184.6315018995	5139.97100236364	5722.08883873294
WYC40	12448.6685975478	4872.81221876285	3726.85086130947	4774.92981128617	2484.25078702169	5431.31640679188
WYC43	32791.4573885915	10001.4649997267	3914.89744259055	4335.51480583334	3673.24816179584	3080.86945633403
WYD01	5214.49748423077	5067.67748204412	2806.81041192628	253.265039612667	8030.82084611036	4262.12400045054
WYD02	6864.33923169716	2273.16019240272	5263.5629416912	6735.70354200511	6880.02832948602	7168.34710127515
WYD03	30351.0968911496	11734.342121633	4104.17556924074	21722.601358949	5139.97100236364	2783.14829423242
WYD04	12448.6685975478	3354.63623126694	2627.25055557648	4774.92981128617	8889.90022750322	2184.0235871413
WYD05	10162.3050187563	3540.08085856838	4678.99675261483	6735.70354200511	7743.72643850288	6012.31952319879
WYD07	14455.33053979	8727.69005925535	3726.85086130947	3894.45550573382	3080.86945633403	5722.08883873294
WYD08	7633.34936472273	5067.67748204412	2806.81041192628	3451.55030922969	10315.082306535	6302.03650605272
WYD10	5658.28471764599	3540.08085856838	6257.37243174712	5649.44768102435	6012.31952319879	8603.89431201518
WYD11	21048.0053727014	10215.9953264995	4294.64354189669	8245.89384621439	8889.90022750322	6591.26511389237
WYD12	6257.37243174712	3354.63623126694	4104.17556924074	3451.55030922969	6880.02832948602	4555.41691939217
WYM01	26099.0028969305	11297.644199405	10646.8822330769	8889.90022750322	5139.97100236364	9460.91082082839
WYM03	25733.4511918303	4872.81221876285	4872.81221876285	8245.89384621439	6880.02832948602	4262.12400045054
WYM04	69122.4241095263	16214.3184533435	13726.0449502336	14621.0317000869	6591.26511389237	2184.0235871413
WYM05	102844.640361013	10863.2206554491	9361.64208507319	5212.86291207678	5431.31640679188	6302.03650605272
WYM06	20338.8512282924	9361.64208507319	2806.81041192628	6735.70354200511	3968.08755265501	5139.97100236364
WYM07	50506.8260175639	15985.8316301031	8938.33676054417	12298.4299264461	6012.31952319879	8030.82084611036
WYM08	16844.8964248611	4104.17556924074	5460.44076253933	6084.79589579673	5722.08883873294	3080.86945633403
WYM09	23014.7090219613	7478.66980358814	13726.0449502336	8245.89384621439	4555.41691939217	6012.31952319879
WYM10	7478.66980358814	6864.33923169716	5067.67748204412	4774.92981128617	7456.24060079333	4262.12400045054
WYM11	14624.3466014237	1422.19264090555	2806.81041192628	4994.07267098302	6302.03650605272	7456.24060079333
WYM12	43572.8047133402	10001.4649997267	5658.28471764599	10812.1374800346	5431.31640679188	3673.24816179584
WYM13	21403.8064715513	6056.77334578999	5263.5629416912	4555.41691939217	6012.31952319879	8889.90022750322
WYM14	14286.5816668983	7273.10358357974	4678.99675261483	5431.31640679188	3673.24816179584	4848.01765184336
WYM15	44948.4026848797	19691.7192115461	12173.2523677125	4115.20222080752	6302.03650605272	4262.12400045054
WYM16	23374.8098380605	6661.17487499426	8727.69005925535	5431.31640679188	4848.01765184336	6880.02832948602
WYM17	120888.871921742	27629.5334997384	93215.5169357992	9104.18254886758	4262.12400045054	5431.31640679188
WYM18	48511.6455143442	15757.7862030214	15303.0382415833	14410.480029481	964.5233751467	5722.08883873294
WYM19	38708.7495144422	11297.644199405	6661.17487499426	42189.2309554715	5722.08883873294	7456.24060079333
WYM20	41033.764989039	7892.09142036748	2806.81041192628	5867.2700778771	5431.31640679188	4555.41691939217
WYM24	33547.4019017716	10646.8822330769	5658.28471764599	29354.0919694282	4848.01765184336	6880.02832948602
WYM26	79237.1723981814	18989.0298036492	6864.33923169716	22758.998111975	334.263662174334	8030.82084611036
WYM28	10971.6097804492	5263.5629416912	4294.64354189669	3894.45550573382	5431.31640679188	6591.26511389237
WYM30	14793.627596556	5067.67748204412	3540.08085856838	7815.53613090606	4262.12400045054	4555.41691939217
WYM31	7324.42227953607	6458.84627022736	1422.19264090555	3006.5423344927	3080.86945633403	5722.08883873294
WYM32	12946.4946936206	7685.00411420716	3540.08085856838	4335.51480583334	4262.12400045054	4555.41691939217
WYM34	16328.7259644266	5658.28471764599	3354.63623126694	7815.53613090606	3377.53628855491	4262.12400045054
WYM35	47915.2315475024	14174.2319893457	7478.66980358814	11874.4846795651	6591.26511389237	6012.31952319879
WYM36	36020.0103659141	12614.3164685197	8517.72962958827	15462.1423609394	6302.03650605272	6012.31952319879
WYM37	10162.3050187563	5658.28471764599	6257.37243174712	8675.42807711452	4555.41691939217	3673.24816179584
WYM38	9680.83765029827	3354.63623126694	2627.25055557648	6735.70354200511	6591.26511389237	3968.08755265501
WYM40	10001.4649997267	4294.64354189669	5263.5629416912	5212.86291207678	1578.7179258101	3377.53628855491
WYM41	18580.7398526448	7068.32122683791	6257.37243174712	8030.82084611036	3377.53628855491	4262.12400045054
WYM42	26099.0028969305	10431.1374803377	10431.1374803377	8030.82084611036	4555.41691939217	5139.97100236364
WYM43	38130.3958484624	6056.77334578999	29109.7361677971	22344.6518598306	1578.7179258101	10883.0760027195
WYM44	320049.099416261	61870.0912682908	25429.3605988125	233960.001445573	12580.7611012817	11449.9828496712
WYT01	36020.0103659141	8570.15473478918	7478.66980358814	29148.8881024426	5867.2700778771	5139.97100236364
WYT02	15473.3572251925	5509.8121674369	3170.5700484874	2783.14829423242	1654.79195888141	5722.08883873294
WYT03	95392.6278737714	23555.1430805673	7273.10358357974	5867.2700778771	1426.15783127688	4262.12400045054
WYT04	15473.3572251925	7017.25003300809	2987.94025746926	6084.79589579673	4335.51480583334	6591.26511389237
WYT05	10971.6097804492	5361.8794821301	2627.25055557648	5649.44768102435	4555.41691939217	5139.97100236364
WYT06	8727.69005925535	3633.30333156149	5067.67748204412	6519.00245327666	2559.09319113468	5139.97100236364
WYT07	8885.61140201036	5067.67748204412	3914.89744259055	10172.9066752902	2559.09319113468	8317.53883161759
WYT08	6559.90493713248	5214.49748423077	2273.16019240272	3894.45550573382	6302.03650605272	5139.97100236364
WYT09	20693.0169108124	10162.3050187563	8308.46776743514	4335.51480583334	5649.44768102435	10315.082306535
WYT10	74578.0733600685	18930.6292306351	9149.65790097391	1654.79195888141	4994.07267098302	6591.26511389237
WYT100	4775.77133730065	5067.67748204412	2806.81041192628	2108.73703232234	8889.90022750322	6012.31952319879
WYT101	39868.9619274035	12835.6388462012	6661.17487499426	5431.31640679188	3673.24816179584	8317.53883161759
WYT102	11624.9578755294	8938.33676054417	4872.81221876285	3894.45550573382	6302.03650605272	5722.08883873294
WYT103	8885.61140201036	4486.26262891485	1926.40766398203	3229.32800049687	7456.24060079333	8030.82084611036
WYT104	52713.9089969401	7478.66980358814	4104.17556924074	4994.07267098302	2783.14829423242	6880.02832948602
WYT105	22296.800346919	4678.99675261483	2987.94025746926	3673.24816179584	8030.82084611036	12015.8605567602
WYT106	8727.69005925535	4872.81221876285	2806.81041192628	4335.51480583334	1882.26823666733	6012.31952319879
WYT107	16844.8964248611	6257.37243174712	5263.5629416912	5212.86291207678	7743.72643850288	9745.93732243139
WYT108	13614.3046776706	11080.1441024069	2273.16019240272	3006.5423344927	8889.90022750322	7456.24060079333
WYT109	13113.0195072771	9574.27832997184	4872.81221876285	3673.24816179584	6012.31952319879	8317.53883161759
WYT110	6711.88833486356	4872.81221876285	3354.63623126694	2108.73703232234	7456.24060079333	4262.12400045054
WYT111	8099.91726070488	3914.89744259055	4486.26262891485	4335.51480583334	7743.72643850288	5431.31640679188
WYT112	34115.880861771	11734.342121633	8099.91726070488	7815.53613090606	6591.26511389237	1882.26823666733
WYT113	99109.1479135129	13949.8947215026	3540.08085856838	19644.2512822296	7168.34710127515	3080.86945633403
WYT114	40450.7956927293	11953.524438726	2987.94025746926	16930.1057183409	1882.26823666733	6591.26511389237
WYT115	90828.627825129	11297.644199405	8308.46776743514	5431.31640679188	7168.34710127515	6012.31952319879
WYT13	16157.1556169162	5658.28471764599	1422.19264090555	8030.82084611036	2783.14829423242	10030.6580477313
WYT14	13446.9271052854	5956.808365677	2987.94025746926	9318.27983405056	9318.27983405056	1882.26823666733
WYT15	10277.4024912989	11297.644199405	2897.18362748047	6921.24347099435	10599.2188672872	4555.41691939217
WYT16	7788.45456104485	5956.808365677	2273.16019240272	4774.92981128617	4115.20222080752	5722.08883873294
WYT17	8727.69005925535	4630.71056806774	6056.77334578999	8030.82084611036	4115.20222080752	5722.08883873294
WYT19	82435.3778388864	14963.1713111386	6056.77334578999	10386.1430871192	6519.00245327666	4555.41691939217
WYT20	46923.4430664732	10162.3050187563	6458.84627022736	32221.5881872267	1654.79195888141	5431.31640679188
WYT21	42593.8124603325	5956.808365677	5067.67748204412	34875.8711771552	3229.32800049687	4848.01765184336
WYT22	10001.4649997267	6106.83997751961	3354.63623126694	5212.86291207678	4115.20222080752	5139.97100236364
WYT23	3493.59345207644	457.374756110349	787.703070371494	3006.5423344927	4555.41691939217	2783.14829423242
WYT24	6106.83997751961	3633.30333156149	4678.99675261483	5867.2700778771	3451.55030922969	5431.31640679188
WYT25	11953.524438726	4630.71056806774	6056.77334578999	5867.2700778771	5212.86291207678	4848.01765184336
WYT26	7943.97919443324	2538.08329811971	3540.08085856838	8460.76105452585	7168.34710127515	2783.14829423242
WYT27	23014.7090219613	6408.39691274201	4104.17556924074	24826.6806126902	3673.24816179584	5722.08883873294
WYT28	433704.617757728	101744.027041649	28615.1755454552	340968.847918735	9959.50601417923	5431.31640679188
WYT29	592714.124766577	83291.1056184189	36913.3363107107	334966.566172621	17766.820456734	7743.72643850288
WYT30	6257.37243174712	5067.67748204412	4294.64354189669	4774.92981128617	2783.14829423242	7168.34710127515
WYT31	5509.8121674369	2273.16019240272	2098.81335110841	2559.09319113468	4115.20222080752	4555.41691939217
WYT32	31849.8399060026	10001.4649997267	8517.72962958827	18393.4044106931	1654.79195888141	7168.34710127515
WYT33	10646.8822330769	1883.62385535483	6056.77334578999	5431.31640679188	2108.73703232234	4848.01765184336
WYT34	6864.33923169716	3773.74464726518	3170.5700484874	9104.18254886758	4115.20222080752	1578.7179258101
WYT36	29977.9531252986	6711.88833486356	3170.5700484874	27710.9524477202	5212.86291207678	3673.24816179584
WYT37	31849.8399060026	8570.15473478918	3914.89744259055	30174.3847653232	6519.00245327666	7168.34710127515
WYT38	6408.39691274201	3354.63623126694	3170.5700484874	4335.51480583334	3229.32800049687	4262.12400045054
WYT39	10001.4649997267	4630.71056806774	5067.67748204412	4774.92981128617	4115.20222080752	4262.12400045054
WYT40	9680.83765029827	3633.30333156149	4678.99675261483	8889.90022750322	3229.32800049687	6591.26511389237
WYT41	17709.9373005051	7017.25003300809	5658.28471764599	7384.30610725739	2559.09319113468	5139.97100236364
WYT42	8413.01059021106	3354.63623126694	2273.16019240272	9104.18254886758	2783.14829423242	4262.12400045054
WYT43	10646.8822330769	3493.59345207644	1926.40766398203	5431.31640679188	4335.51480583334	3968.08755265501
WYT44	6408.39691274201	1504.7574688656	2098.81335110841	4555.41691939217	5431.31640679188	4555.41691939217
WYT45	9840.97449444045	4630.71056806774	2987.94025746926	7815.53613090606	2108.73703232234	6302.03650605272
WYT46	9521.05872380739	5807.28676459116	3914.89744259055	5431.31640679188	4335.51480583334	3673.24816179584
WYT47	75844.9327594802	19809.1682964791	10001.4649997267	8675.42807711452	2559.09319113468	1272.99494680496
WYT48	11134.465387089	3354.63623126694	5460.44076253933	6735.70354200511	3229.32800049687	3673.24816179584
WYT49	9840.97449444045	4486.26262891485	2627.25055557648	6302.03650605272	4555.41691939217	4848.01765184336
WYT50	4486.26262891485	2142.22261192336	3170.5700484874	6084.79589579673	2108.73703232234	5722.08883873294
WYT51	10001.4649997267	2671.98922950531	2987.94025746926	4115.20222080752	3006.5423344927	6591.26511389237
WYT52	7633.34936472273	2142.22261192336	2449.33830504359	4555.41691939217	4774.92981128617	964.5233751467
WYT53	11461.1428065873	6257.37243174712	5067.67748204412	8889.90022750322	2108.73703232234	4262.12400045054
WYT54	11624.9578755294	5807.28676459116	3170.5700484874	5212.86291207678	6952.14891157651	6880.02832948602
WYT55	9680.83765029827	6864.33923169716	4486.26262891485	8889.90022750322	0	1272.99494680496
WYT56	17363.2179249153	8099.91726070488	5067.67748204412	7600.03343251484	5431.31640679188	2484.25078702169
WYT57	20870.4089346806	7017.25003300809	7068.32122683791	5867.2700778771	6302.03650605272	1272.99494680496
WYT58	9680.83765029827	3216.45428574537	4486.26262891485	4774.92981128617	2334.31453429402	3968.08755265501
WYT59	90612.0552046511	38901.7952717884	18289.8446990039	3673.24816179584	6084.79589579673	5431.31640679188
WYT60	22834.9435910633	6711.88833486356	6864.33923169716	21307.5384962834	4994.07267098302	3377.53628855491
WYT61	30911.9775667495	10485.0175286668	8517.72962958827	13567.1248722733	5649.44768102435	3377.53628855491
WYT62	415022.361775745	118864.759038797	37937.8740929111	94548.8323807461	15672.1541255548	10030.6580477313
WYT64	83719.4171444448	13057.4792303655	4486.26262891485	9959.50601417923	9460.91082082839	5722.08883873294
WYT65	448191.737135039	29357.4450397845	4104.17556924074	6302.03650605272	6012.31952319879	3968.08755265501
WYT66	75633.5891280713	8938.33676054417	1422.19264090555	4994.07267098302	7456.24060079333	5139.97100236364
WYT67	43572.8047133402	10215.9953264995	3540.08085856838	4774.92981128617	8889.90022750322	7168.34710127515
WYT69	8256.26294041053	3914.89744259055	5067.67748204412	3673.24816179584	6880.02832948602	10883.0760027195
WYT71	17536.4615750039	6864.33923169716	7068.32122683791	4774.92981128617	7456.24060079333	3968.08755265501
WYT72	14455.33053979	5067.67748204412	2449.33830504359	3451.55030922969	8603.89431201518	8603.89431201518
WYT73	33547.4019017716	5658.28471764599	4104.17556924074	5212.86291207678	6591.26511389237	6591.26511389237
WYT74	14118.1022803812	5067.67748204412	5067.67748204412	3894.45550573382	8317.53883161759	5139.97100236364
WYT75	24278.3372202816	6661.17487499426	4294.64354189669	6735.70354200511	8030.82084611036	9175.56864034164
WYT76	7017.25003300809	3914.89744259055	5460.44076253933	5212.86291207678	5722.08883873294	7168.34710127515
WYT77	7017.25003300809	3540.08085856838	4294.64354189669	3673.24816179584	8889.90022750322	6880.02832948602
WYT78	78599.6016272823	5067.67748204412	4872.81221876285	9745.93732243139	3080.86945633403	7168.34710127515
WYT79	12448.6685975478	4294.64354189669	6257.37243174712	5649.44768102435	4262.12400045054	5139.97100236364
WYT80	8413.01059021106	4486.26262891485	2627.25055557648	2559.09319113468	6591.26511389237	7168.34710127515
WYT81	8570.15473478918	3170.5700484874	4294.64354189669	6952.14891157651	4848.01765184336	8030.82084611036
WYT82	6257.37243174712	5857.0700492999	6056.77334578999	2559.09319113468	8030.82084611036	5139.97100236364
WYT83	6257.37243174712	4678.99675261483	2987.94025746926	4335.51480583334	6591.26511389237	4555.41691939217
WYT84	33547.4019017716	9787.5560427996	8938.33676054417	19227.636686823	4848.01765184336	6880.02832948602
WYT85	14118.1022803812	6458.84627022736	5658.28471764599	5649.44768102435	7168.34710127515	2484.25078702169
WYT86	1200132.61436574	15076.345334248	7478.66980358814	24000.3970955163	5722.08883873294	8889.90022750322
WYT88	18057.5783641131	6257.37243174712	4872.81221876285	3451.55030922969	6880.02832948602	6591.26511389237
WYT89	41812.8034318455	3914.89744259055	5263.5629416912	7168.34710127515	4555.41691939217	11449.9828496712
WYT90	10001.4649997267	5658.28471764599	5263.5629416912	2559.09319113468	7168.34710127515	10883.0760027195
WYT91	16844.8964248611	7068.32122683791	4872.81221876285	8675.42807711452	4848.01765184336	2783.14829423242
WYT92	28676.9327669193	11515.7128295622	7892.09142036748	6302.03650605272	3080.86945633403	5722.08883873294
WYT93	52311.6735607231	13949.8947215026	8308.46776743514	7600.03343251484	5431.31640679188	2783.14829423242
WYT96	8256.26294041053	4678.99675261483	4678.99675261483	6952.14891157651	3673.24816179584	8030.82084611036
WYT97	18231.7404591178	5263.5629416912	5857.0700492999	9104.18254886758	4848.01765184336	8889.90022750322
WYT99	9202.59222254444	3540.08085856838	2987.94025746926	8675.42807711452	9175.56864034164	6591.26511389237
