# Supplementary material for: Relationships between community composition, productivity and invasion resistance in semi-natural bacterial microcosms
Source: eLife. 2021 Oct 18;10:e71811. doi: 10.7554/eLife.71811 (PMC8523168; doi:10.7554/eLife.71811)
Supplement: Figure 1—source data 2. — Key columns are invader (invader assayed – P. fluorescens SBW25 or P. putida KT2440), rep (replicate), the cfu.00 columns (cells per ml at n hours of growth) and the lum.00 columns (lux at n hours of growth). [file elife-71811-fig1-data2.csv]

invader	rep	time	count	dilution	permlfactor	cfu.12	cfu.14	cfu.16	cfu.18	cfu.20	cfu.22	cfu.24	cfu.96	cfu.7d	lum.12	lum.14	lum.16	lum.18	lum.20	lum.22	lum.24	lum.96	lum.7d
KT2440	1	12	26	100	66.66666667	173333.3333	600000	3000000	6000000	14000000	16666666.67	18666666.67	23333333.33	73333333.33	230	873	5146	11720	14801	5581	3197	318	266
KT2440	2	12	18	100	66.66666667	120000	933333.3333	2600000	5333333.333	18666666.67	13333333.33	25333333.33	20666666.67	40000000	253	1031	4830	11170	13976	5652	3187	372	437
KT2440	3	12	20	100	66.66666667	133333.3333	800000	3000000	6000000	25333333.33	21333333.33	18666666.67	24000000	26666666.67	252	786	4664	11288	12180	6603	4387	626	632
KT2440	4	12	11	100	66.66666667	73333.33333	1066666.667	2333333.333	6666666.667	18666666.67	15333333.33	24000000	25333333.33	6666666.667	227	670	4342	10198	11158	6441	4024	561	362
KT2440	5	12	27	100	66.66666667	180000	1066666.667	2533333.333	7333333.333	22666666.67	18000000	18000000	31333333.33	20000000	248	748	4283	10313	12171	7096	4240	825	682
KT2440	6	12	21	100	66.66666667	140000	666666.6667	2800000	6000000	22000000	18666666.67	23333333.33	27333333.33	13333333.33	240	611	4389	10035	10187	6694	4272	562	391
KT2440	7	12	20	100	66.66666667	133333.3333	1266666.667	2400000	7333333.333	21333333.33	21333333.33	26000000	21333333.33	13333333.33	194	680	3274	8936	12497	6352	4299	971	718
KT2440	8	12	22	100	66.66666667	146666.6667	933333.3333	2333333.333	6000000	14666666.67	12000000	21333333.33	31333333.33	20000000	185	603	3755	10144	13880	6196	3477	558	387
SBW25	1	12	14	100	66.66666667	93333.33333	733333.3333	2066666.667	3200000	15333333.33	14000000	24000000	34666666.67	40000000	134	535	3443	9730	14640	9053	2981	427	343
SBW25	2	12	17	100	66.66666667	113333.3333	733333.3333	2466666.667	4266666.667	1333333.333	12666666.67	18666666.67	31333333.33	33333333.33	143	498	3002	8977	15237	9241	3429	541	502
SBW25	3	12	10	100	66.66666667	66666.66667	400000	2333333.333	3133333.333	8666666.667	12000000	18666666.67	28666666.67	26666666.67	123	437	2331	8070	16631	11644	3835	730	546
SBW25	4	12	11	100	66.66666667	73333.33333	466666.6667	2666666.667	3666666.667	3333333.333	16666666.67	19333333.33	19333333.33	13333333.33	127	414	2365	7235	15009	12988	4657	747	561
SBW25	5	12	12	100	66.66666667	80000	533333.3333	2733333.333	3000000	11333333.33	16666666.67	20000000	24666666.67	6666666.667	98	480	2310	2315	15759	10596	2969	904	600
SBW25	6	12	1	100	66.66666667	6666.666667	400000	2533333.333	4466666.667	1333333.333	12666666.67	24000000	27333333.33	26666666.67	106	407	1841	6987	16960	12089	4545	758	575
SBW25	7	12	18	100	66.66666667	120000	733333.3333	2533333.333	3200000	12666666.67	16666666.67	25333333.33	33333333.33	13333333.33	85	370	1549	5840	15261	12713	4717	1084	678
SBW25	8	12	11	100	66.66666667	73333.33333	866666.6667	2266666.667	3800000	666666.6667	18000000	22666666.67	26666666.67	26666666.67	82	339	1794	5356	15097	9723	3958	821	550
