# Supplementary material for: Relationships between community composition, productivity and invasion resistance in semi-natural bacterial microcosms
Source: eLife. 2021 Oct 18;10:e71811. doi: 10.7554/eLife.71811 (PMC8523168; doi:10.7554/eLife.71811)
Supplement: Figure 1—source data 3. [file elife-71811-fig1-data3.csv]

Community	sbw25.cfu.24h	sbw25.cfu.96h	sbw25.cfu.7d	kt2440.cfu.24h	kt2440.cfu.96h	kt2440.cfu.7d
AE01	FALSE	FALSE	TRUE	FALSE	TRUE	TRUE
AE02	FALSE	FALSE	FALSE	FALSE	TRUE	TRUE
AE03	FALSE	FALSE	FALSE	TRUE	TRUE	TRUE
AE04	FALSE	FALSE	TRUE	FALSE	FALSE	TRUE
AE06	FALSE	FALSE	TRUE	TRUE	TRUE	TRUE
AE07	FALSE	FALSE	TRUE	TRUE	TRUE	TRUE
AE08	FALSE	FALSE	TRUE	TRUE	TRUE	TRUE
AE09	FALSE	FALSE	FALSE	FALSE	FALSE	TRUE
AE10	FALSE	FALSE	TRUE	TRUE	TRUE	TRUE
AE102	FALSE	TRUE	TRUE	TRUE	TRUE	TRUE
AE104	FALSE	TRUE	TRUE	TRUE	TRUE	TRUE
AE105	FALSE	FALSE	FALSE	FALSE	TRUE	TRUE
AE106	FALSE	FALSE	FALSE	FALSE	TRUE	TRUE
AE108	FALSE	FALSE	FALSE	FALSE	TRUE	TRUE
AE109	FALSE	TRUE	TRUE	TRUE	TRUE	TRUE
AE11	FALSE	FALSE	TRUE	TRUE	FALSE	TRUE
AE111	FALSE	TRUE	TRUE	TRUE	TRUE	TRUE
AE112	FALSE	FALSE	FALSE	TRUE	TRUE	TRUE
AE113	FALSE	FALSE	FALSE	TRUE	TRUE	TRUE
AE114	FALSE	FALSE	FALSE	TRUE	FALSE	TRUE
AE115	FALSE	FALSE	FALSE	TRUE	FALSE	TRUE
AE117	FALSE	FALSE	FALSE	FALSE	TRUE	TRUE
AE118	FALSE	FALSE	FALSE	TRUE	TRUE	TRUE
AE119	FALSE	FALSE	FALSE	TRUE	TRUE	TRUE
AE120	FALSE	FALSE	FALSE	FALSE	TRUE	TRUE
AE122	FALSE	FALSE	FALSE	FALSE	TRUE	TRUE
AE123	FALSE	TRUE	FALSE	FALSE	TRUE	TRUE
AE124	FALSE	TRUE	FALSE	TRUE	TRUE	TRUE
AE125	FALSE	FALSE	TRUE	TRUE	TRUE	TRUE
AE127	FALSE	TRUE	TRUE	FALSE	TRUE	TRUE
AE128	FALSE	FALSE	TRUE	TRUE	TRUE	TRUE
AE129	FALSE	TRUE	TRUE	TRUE	TRUE	TRUE
AE13	FALSE	FALSE	FALSE	FALSE	FALSE	TRUE
AE130	FALSE	FALSE	FALSE	FALSE	TRUE	TRUE
AE131	FALSE	FALSE	FALSE	FALSE	TRUE	TRUE
AE133	FALSE	FALSE	TRUE	FALSE	TRUE	TRUE
AE134	FALSE	FALSE	FALSE	FALSE	TRUE	TRUE
AE135	FALSE	FALSE	TRUE	FALSE	TRUE	TRUE
AE136	FALSE	FALSE	FALSE	TRUE	TRUE	TRUE
AE137	FALSE	TRUE	TRUE	FALSE	TRUE	TRUE
AE139	FALSE	FALSE	FALSE	FALSE	TRUE	TRUE
AE14	FALSE	FALSE	TRUE	TRUE	TRUE	TRUE
AE143	FALSE	FALSE	TRUE	FALSE	FALSE	TRUE
AE144	FALSE	FALSE	FALSE	TRUE	TRUE	TRUE
AE145	FALSE	FALSE	TRUE	TRUE	TRUE	TRUE
AE146	FALSE	FALSE	TRUE	FALSE	TRUE	TRUE
AE147	FALSE	FALSE	FALSE	FALSE	TRUE	TRUE
AE149	FALSE	FALSE	FALSE	FALSE	TRUE	TRUE
AE15	FALSE	FALSE	TRUE	TRUE	FALSE	TRUE
AE150	FALSE	FALSE	FALSE	FALSE	FALSE	TRUE
AE151	FALSE	FALSE	TRUE	TRUE	FALSE	TRUE
AE152	FALSE	FALSE	FALSE	FALSE	TRUE	TRUE
AE153	FALSE	FALSE	TRUE	FALSE	TRUE	TRUE
AE154	FALSE	TRUE	TRUE	FALSE	TRUE	TRUE
AE156	FALSE	FALSE	FALSE	FALSE	TRUE	TRUE
AE157	FALSE	FALSE	FALSE	FALSE	TRUE	TRUE
AE158	FALSE	TRUE	FALSE	FALSE	TRUE	TRUE
AE159	FALSE	FALSE	TRUE	FALSE	TRUE	TRUE
AE16	FALSE	FALSE	TRUE	TRUE	FALSE	TRUE
AE160	FALSE	FALSE	TRUE	TRUE	TRUE	TRUE
AE161	FALSE	FALSE	TRUE	FALSE	TRUE	TRUE
AE162	FALSE	FALSE	TRUE	TRUE	TRUE	TRUE
AE163	FALSE	TRUE	FALSE	TRUE	TRUE	TRUE
AE164	FALSE	TRUE	TRUE	FALSE	TRUE	TRUE
AE165	FALSE	FALSE	FALSE	FALSE	TRUE	TRUE
AE166	FALSE	FALSE	FALSE	FALSE	TRUE	TRUE
AE167	FALSE	TRUE	FALSE	TRUE	TRUE	TRUE
AE168	FALSE	FALSE	TRUE	TRUE	TRUE	TRUE
AE169	FALSE	TRUE	TRUE	TRUE	TRUE	TRUE
AE17	FALSE	FALSE	FALSE	FALSE	FALSE	TRUE
AE170	FALSE	TRUE	TRUE	TRUE	TRUE	TRUE
AE171	FALSE	TRUE	TRUE	FALSE	TRUE	TRUE
AE173	FALSE	FALSE	FALSE	FALSE	TRUE	TRUE
AE174	FALSE	FALSE	FALSE	FALSE	TRUE	TRUE
AE175	FALSE	FALSE	FALSE	TRUE	TRUE	TRUE
AE176	FALSE	FALSE	TRUE	FALSE	TRUE	TRUE
AE177	FALSE	TRUE	TRUE	TRUE	TRUE	TRUE
AE178	FALSE	TRUE	TRUE	TRUE	TRUE	TRUE
AE18	FALSE	FALSE	TRUE	FALSE	FALSE	TRUE
AE19	FALSE	FALSE	TRUE	TRUE	FALSE	TRUE
AE20	FALSE	FALSE	FALSE	FALSE	FALSE	TRUE
AE21	FALSE	FALSE	FALSE	TRUE	FALSE	TRUE
AE24	FALSE	FALSE	TRUE	TRUE	FALSE	TRUE
AE25	FALSE	FALSE	FALSE	FALSE	FALSE	TRUE
AE28	FALSE	FALSE	FALSE	FALSE	FALSE	TRUE
AE29	FALSE	FALSE	FALSE	TRUE	TRUE	TRUE
AE30	FALSE	FALSE	TRUE	TRUE	TRUE	TRUE
AE31	FALSE	FALSE	TRUE	TRUE	FALSE	TRUE
AE32	FALSE	FALSE	FALSE	TRUE	TRUE	TRUE
AE33	FALSE	FALSE	FALSE	TRUE	FALSE	TRUE
AE34	FALSE	FALSE	TRUE	TRUE	FALSE	TRUE
AE35	FALSE	FALSE	TRUE	FALSE	FALSE	TRUE
AE36	FALSE	FALSE	TRUE	TRUE	FALSE	TRUE
AE37	FALSE	FALSE	TRUE	FALSE	TRUE	TRUE
AE38	FALSE	FALSE	TRUE	TRUE	TRUE	TRUE
AE39	FALSE	FALSE	TRUE	TRUE	TRUE	TRUE
AE40	FALSE	FALSE	TRUE	TRUE	TRUE	TRUE
AE41	FALSE	FALSE	TRUE	TRUE	TRUE	TRUE
AE42	FALSE	FALSE	TRUE	TRUE	FALSE	TRUE
AE43	FALSE	FALSE	TRUE	TRUE	TRUE	TRUE
AE44	FALSE	FALSE	TRUE	TRUE	FALSE	TRUE
AE45	FALSE	FALSE	TRUE	TRUE	FALSE	TRUE
AE46	FALSE	FALSE	TRUE	FALSE	TRUE	TRUE
AE47	TRUE	FALSE	TRUE	TRUE	TRUE	TRUE
AE48	FALSE	FALSE	FALSE	TRUE	TRUE	TRUE
AE49	FALSE	FALSE	TRUE	TRUE	FALSE	TRUE
AE51	FALSE	FALSE	TRUE	TRUE	FALSE	TRUE
AE53	FALSE	FALSE	TRUE	TRUE	TRUE	TRUE
AE54	TRUE	FALSE	TRUE	TRUE	TRUE	TRUE
AE55	FALSE	TRUE	FALSE	FALSE	FALSE	TRUE
AE56	TRUE	FALSE	TRUE	TRUE	TRUE	TRUE
AE57	FALSE	FALSE	TRUE	TRUE	TRUE	TRUE
AE58	FALSE	FALSE	TRUE	TRUE	FALSE	TRUE
AE59	TRUE	TRUE	TRUE	TRUE	TRUE	TRUE
AE60	FALSE	TRUE	TRUE	TRUE	TRUE	TRUE
AE61	TRUE	TRUE	TRUE	TRUE	TRUE	TRUE
AE62	TRUE	TRUE	TRUE	TRUE	TRUE	TRUE
AE63	TRUE	TRUE	TRUE	FALSE	TRUE	TRUE
AE64	TRUE	TRUE	TRUE	TRUE	TRUE	TRUE
AE65	FALSE	FALSE	TRUE	TRUE	TRUE	TRUE
AE66	FALSE	FALSE	TRUE	TRUE	TRUE	TRUE
AE67	FALSE	TRUE	TRUE	TRUE	TRUE	TRUE
AE68	FALSE	FALSE	TRUE	FALSE	TRUE	TRUE
AE69	FALSE	TRUE	TRUE	TRUE	TRUE	TRUE
AE70	TRUE	TRUE	TRUE	TRUE	TRUE	TRUE
AE71	TRUE	TRUE	TRUE	TRUE	TRUE	TRUE
AE72	FALSE	TRUE	FALSE	FALSE	TRUE	TRUE
AE73	FALSE	FALSE	TRUE	TRUE	FALSE	TRUE
AE74	FALSE	FALSE	TRUE	FALSE	TRUE	TRUE
AE76	FALSE	TRUE	TRUE	TRUE	TRUE	TRUE
AE77	FALSE	FALSE	FALSE	TRUE	TRUE	TRUE
AE78	FALSE	TRUE	FALSE	TRUE	TRUE	TRUE
AE79	FALSE	TRUE	TRUE	TRUE	TRUE	TRUE
AE80	FALSE	TRUE	TRUE	TRUE	TRUE	TRUE
AE81	FALSE	TRUE	TRUE	FALSE	TRUE	TRUE
AE82	FALSE	TRUE	TRUE	TRUE	TRUE	TRUE
AE83	FALSE	FALSE	TRUE	TRUE	TRUE	TRUE
AE84	FALSE	FALSE	FALSE	TRUE	TRUE	TRUE
AE85	FALSE	FALSE	FALSE	FALSE	TRUE	TRUE
AE86	FALSE	FALSE	TRUE	TRUE	TRUE	TRUE
AE87	FALSE	TRUE	TRUE	TRUE	TRUE	TRUE
AE88	FALSE	TRUE	TRUE	TRUE	TRUE	TRUE
AE89	FALSE	TRUE	TRUE	TRUE	TRUE	TRUE
AE90	FALSE	FALSE	FALSE	TRUE	TRUE	TRUE
AE91	FALSE	FALSE	FALSE	TRUE	TRUE	TRUE
AE94	FALSE	FALSE	TRUE	TRUE	TRUE	TRUE
AE96	FALSE	FALSE	TRUE	FALSE	TRUE	TRUE
AE99	FALSE	FALSE	FALSE	FALSE	TRUE	TRUE
BB02	FALSE	FALSE	FALSE	FALSE	TRUE	TRUE
BB04	FALSE	FALSE	FALSE	FALSE	TRUE	TRUE
BB05	FALSE	FALSE	FALSE	TRUE	TRUE	TRUE
BB06	FALSE	FALSE	FALSE	TRUE	TRUE	TRUE
BB07	FALSE	FALSE	FALSE	FALSE	TRUE	TRUE
BB08	FALSE	FALSE	FALSE	FALSE	TRUE	TRUE
BB09	FALSE	TRUE	TRUE	TRUE	TRUE	TRUE
BB10	FALSE	TRUE	TRUE	TRUE	TRUE	TRUE
BB11	FALSE	TRUE	TRUE	TRUE	TRUE	TRUE
BB12	FALSE	TRUE	TRUE	TRUE	TRUE	TRUE
BB14	FALSE	TRUE	TRUE	TRUE	TRUE	TRUE
BB15	FALSE	TRUE	FALSE	TRUE	TRUE	TRUE
BB16	FALSE	FALSE	FALSE	TRUE	TRUE	TRUE
BB17	FALSE	FALSE	TRUE	TRUE	TRUE	TRUE
BB18	FALSE	TRUE	TRUE	TRUE	TRUE	TRUE
BB20	FALSE	TRUE	FALSE	TRUE	TRUE	TRUE
BB21	FALSE	TRUE	FALSE	TRUE	TRUE	TRUE
BB23	FALSE	TRUE	TRUE	TRUE	TRUE	TRUE
BB24	FALSE	FALSE	TRUE	TRUE	TRUE	TRUE
BB25	FALSE	FALSE	TRUE	TRUE	TRUE	TRUE
BB26	FALSE	TRUE	TRUE	TRUE	TRUE	TRUE
BB33	FALSE	FALSE	FALSE	FALSE	TRUE	TRUE
BB34	FALSE	FALSE	FALSE	FALSE	TRUE	FALSE
BB36	FALSE	FALSE	FALSE	FALSE	TRUE	TRUE
BB37	FALSE	FALSE	FALSE	FALSE	TRUE	TRUE
BB38	FALSE	FALSE	FALSE	TRUE	TRUE	TRUE
BB39	FALSE	FALSE	FALSE	FALSE	TRUE	TRUE
BB43	FALSE	FALSE	TRUE	FALSE	TRUE	TRUE
BB44	FALSE	FALSE	FALSE	FALSE	TRUE	TRUE
BB45	FALSE	FALSE	FALSE	FALSE	TRUE	TRUE
BB46	FALSE	FALSE	FALSE	FALSE	TRUE	TRUE
BB47	FALSE	FALSE	FALSE	FALSE	TRUE	TRUE
BB48	FALSE	FALSE	FALSE	FALSE	TRUE	TRUE
BB49	FALSE	FALSE	FALSE	FALSE	TRUE	TRUE
BB50	FALSE	FALSE	FALSE	FALSE	TRUE	TRUE
BB51	FALSE	FALSE	TRUE	TRUE	TRUE	TRUE
BB53	FALSE	FALSE	FALSE	FALSE	TRUE	TRUE
BB54	FALSE	FALSE	FALSE	FALSE	TRUE	TRUE
BB55	FALSE	FALSE	FALSE	FALSE	TRUE	TRUE
BB56	FALSE	FALSE	FALSE	FALSE	TRUE	TRUE
BB59	FALSE	FALSE	FALSE	FALSE	TRUE	TRUE
BB62	FALSE	FALSE	FALSE	FALSE	TRUE	TRUE
BB65	FALSE	FALSE	FALSE	FALSE	TRUE	TRUE
BB67	FALSE	FALSE	FALSE	FALSE	TRUE	TRUE
BB68	FALSE	FALSE	FALSE	FALSE	TRUE	TRUE
BB69	FALSE	FALSE	FALSE	FALSE	TRUE	TRUE
BB70	FALSE	FALSE	FALSE	FALSE	FALSE	TRUE
BB71	FALSE	FALSE	FALSE	FALSE	FALSE	TRUE
BB72	FALSE	FALSE	FALSE	FALSE	TRUE	TRUE
BB73	FALSE	FALSE	FALSE	FALSE	TRUE	TRUE
BB74	FALSE	FALSE	FALSE	FALSE	TRUE	TRUE
BB75	FALSE	FALSE	FALSE	FALSE	TRUE	TRUE
BB76	FALSE	FALSE	FALSE	FALSE	TRUE	TRUE
BB77	FALSE	FALSE	FALSE	FALSE	TRUE	TRUE
BB78	FALSE	FALSE	FALSE	FALSE	FALSE	TRUE
BB79	FALSE	FALSE	FALSE	FALSE	TRUE	TRUE
BB80	FALSE	FALSE	FALSE	FALSE	TRUE	TRUE
BB81	FALSE	FALSE	FALSE	FALSE	TRUE	TRUE
BB82	FALSE	FALSE	FALSE	FALSE	TRUE	TRUE
BB83	FALSE	TRUE	TRUE	FALSE	TRUE	TRUE
BB84	FALSE	FALSE	FALSE	FALSE	TRUE	TRUE
BB85	FALSE	FALSE	FALSE	FALSE	TRUE	TRUE
BB86	FALSE	FALSE	FALSE	FALSE	TRUE	TRUE
BB87	FALSE	FALSE	FALSE	FALSE	TRUE	TRUE
BB89	FALSE	FALSE	FALSE	FALSE	TRUE	TRUE
BB90	FALSE	FALSE	FALSE	FALSE	TRUE	TRUE
BB91	FALSE	FALSE	FALSE	FALSE	TRUE	TRUE
BB92	FALSE	FALSE	FALSE	FALSE	TRUE	TRUE
BB93	FALSE	FALSE	FALSE	FALSE	TRUE	TRUE
BB94	FALSE	FALSE	FALSE	FALSE	TRUE	TRUE
BB97	FALSE	FALSE	FALSE	FALSE	TRUE	TRUE
BB98	FALSE	FALSE	FALSE	FALSE	TRUE	TRUE
BB99	FALSE	FALSE	FALSE	FALSE	TRUE	TRUE
BCW01	FALSE	FALSE	FALSE	FALSE	TRUE	TRUE
BCW02	FALSE	FALSE	FALSE	TRUE	TRUE	FALSE
BCW03	FALSE	FALSE	TRUE	FALSE	TRUE	TRUE
BCW04	FALSE	FALSE	TRUE	FALSE	TRUE	TRUE
BCW05	FALSE	FALSE	FALSE	FALSE	FALSE	TRUE
BCW06	FALSE	FALSE	FALSE	FALSE	TRUE	TRUE
BCW07	FALSE	FALSE	TRUE	FALSE	FALSE	TRUE
BCW08	FALSE	FALSE	FALSE	TRUE	TRUE	TRUE
BCW09	FALSE	FALSE	FALSE	FALSE	TRUE	TRUE
BCW10	FALSE	FALSE	FALSE	FALSE	TRUE	TRUE
BCW11	FALSE	FALSE	TRUE	FALSE	TRUE	TRUE
BCW12	FALSE	FALSE	FALSE	FALSE	TRUE	TRUE
BCW13	FALSE	FALSE	FALSE	FALSE	TRUE	TRUE
BCW14	FALSE	FALSE	FALSE	FALSE	FALSE	FALSE
BCW15	FALSE	FALSE	TRUE	FALSE	FALSE	TRUE
BCW16	FALSE	FALSE	TRUE	FALSE	TRUE	TRUE
BCW17	FALSE	FALSE	FALSE	FALSE	TRUE	TRUE
BCW18	FALSE	FALSE	FALSE	FALSE	TRUE	TRUE
BCW19	FALSE	TRUE	FALSE	FALSE	TRUE	TRUE
BCW20	FALSE	FALSE	FALSE	FALSE	TRUE	TRUE
BCW21	FALSE	FALSE	FALSE	FALSE	TRUE	TRUE
BCW22	FALSE	FALSE	FALSE	FALSE	FALSE	TRUE
BCW23	FALSE	FALSE	FALSE	FALSE	TRUE	TRUE
BCW24	FALSE	FALSE	FALSE	TRUE	TRUE	TRUE
BCW25	FALSE	FALSE	FALSE	FALSE	TRUE	TRUE
BCW26	FALSE	FALSE	FALSE	FALSE	TRUE	TRUE
BW01	TRUE	TRUE	TRUE	TRUE	TRUE	TRUE
BW02	TRUE	TRUE	TRUE	TRUE	TRUE	TRUE
BW03	TRUE	TRUE	TRUE	TRUE	TRUE	TRUE
BW04	TRUE	TRUE	TRUE	TRUE	TRUE	TRUE
BW05	TRUE	TRUE	TRUE	TRUE	TRUE	TRUE
BW06	TRUE	TRUE	TRUE	TRUE	TRUE	TRUE
BW07	TRUE	TRUE	TRUE	TRUE	TRUE	TRUE
BW08	TRUE	TRUE	TRUE	TRUE	TRUE	TRUE
BW09	TRUE	TRUE	TRUE	TRUE	TRUE	TRUE
BW10	TRUE	TRUE	TRUE	TRUE	TRUE	TRUE
BW11	TRUE	TRUE	TRUE	TRUE	TRUE	TRUE
BW12	TRUE	TRUE	TRUE	TRUE	TRUE	TRUE
BW13	TRUE	TRUE	FALSE	TRUE	TRUE	TRUE
BW14	TRUE	TRUE	TRUE	TRUE	TRUE	TRUE
BW15	TRUE	TRUE	TRUE	TRUE	TRUE	TRUE
BW16	TRUE	TRUE	TRUE	TRUE	TRUE	TRUE
BW17	TRUE	TRUE	TRUE	TRUE	TRUE	TRUE
BW18	FALSE	TRUE	TRUE	TRUE	TRUE	TRUE
BW19	FALSE	TRUE	TRUE	FALSE	TRUE	TRUE
BW20	FALSE	TRUE	TRUE	TRUE	TRUE	TRUE
BW21	FALSE	TRUE	TRUE	TRUE	TRUE	TRUE
BW22	FALSE	FALSE	TRUE	FALSE	TRUE	TRUE
BW23	FALSE	FALSE	FALSE	FALSE	FALSE	FALSE
BW24	FALSE	FALSE	FALSE	FALSE	TRUE	TRUE
BWd01	FALSE	FALSE	TRUE	FALSE	TRUE	TRUE
BWd02	FALSE	TRUE	TRUE	TRUE	TRUE	TRUE
BWd03	FALSE	TRUE	TRUE	TRUE	TRUE	TRUE
BWd04	FALSE	TRUE	TRUE	TRUE	TRUE	TRUE
BWd05	FALSE	TRUE	FALSE	TRUE	TRUE	TRUE
BWd06	FALSE	FALSE	FALSE	FALSE	TRUE	TRUE
BWd07	FALSE	FALSE	FALSE	FALSE	TRUE	TRUE
HW01	FALSE	TRUE	TRUE	TRUE	TRUE	TRUE
HW02	TRUE	TRUE	TRUE	TRUE	TRUE	TRUE
HW03	FALSE	TRUE	TRUE	TRUE	TRUE	TRUE
HW04	FALSE	TRUE	TRUE	TRUE	TRUE	TRUE
HW05	FALSE	TRUE	TRUE	TRUE	TRUE	TRUE
HW06	FALSE	TRUE	TRUE	TRUE	TRUE	TRUE
HW07	TRUE	TRUE	TRUE	TRUE	TRUE	TRUE
HW08	FALSE	TRUE	TRUE	TRUE	TRUE	TRUE
HW09	TRUE	TRUE	TRUE	TRUE	TRUE	TRUE
HW10	TRUE	TRUE	TRUE	TRUE	TRUE	TRUE
HW11	TRUE	TRUE	TRUE	TRUE	TRUE	TRUE
HW12	TRUE	TRUE	FALSE	TRUE	TRUE	TRUE
HW13	FALSE	TRUE	TRUE	TRUE	TRUE	TRUE
HW14	TRUE	TRUE	TRUE	TRUE	TRUE	TRUE
HW15	TRUE	TRUE	TRUE	TRUE	TRUE	TRUE
HW16	TRUE	TRUE	TRUE	TRUE	TRUE	TRUE
LW01	FALSE	TRUE	TRUE	TRUE	TRUE	TRUE
LW02	FALSE	FALSE	TRUE	FALSE	TRUE	TRUE
LW03	FALSE	TRUE	TRUE	FALSE	TRUE	TRUE
LW04	FALSE	TRUE	TRUE	TRUE	TRUE	TRUE
LW05	FALSE	TRUE	TRUE	TRUE	TRUE	TRUE
LW06	FALSE	TRUE	FALSE	TRUE	TRUE	TRUE
LW07	FALSE	TRUE	TRUE	TRUE	TRUE	TRUE
LW08	FALSE	TRUE	TRUE	TRUE	TRUE	TRUE
LW09	FALSE	TRUE	TRUE	TRUE	TRUE	TRUE
LW10	FALSE	FALSE	TRUE	TRUE	TRUE	TRUE
LW11	FALSE	TRUE	FALSE	TRUE	TRUE	TRUE
LW12	FALSE	TRUE	FALSE	FALSE	TRUE	TRUE
OWW01	FALSE	FALSE	FALSE	FALSE	TRUE	TRUE
OWW02	FALSE	FALSE	FALSE	TRUE	TRUE	TRUE
OWW03	FALSE	FALSE	TRUE	TRUE	TRUE	TRUE
OWW04	FALSE	TRUE	TRUE	TRUE	TRUE	TRUE
OWW05	FALSE	FALSE	TRUE	TRUE	TRUE	TRUE
OWW06	FALSE	FALSE	TRUE	TRUE	TRUE	TRUE
OWW07	FALSE	FALSE	TRUE	FALSE	TRUE	TRUE
OWW08	FALSE	FALSE	FALSE	FALSE	TRUE	TRUE
OWW09	FALSE	FALSE	FALSE	FALSE	TRUE	TRUE
OWW10	FALSE	FALSE	TRUE	FALSE	TRUE	TRUE
OWW11	FALSE	TRUE	TRUE	TRUE	TRUE	TRUE
OWW12	FALSE	TRUE	TRUE	TRUE	TRUE	TRUE
OWW13	FALSE	TRUE	TRUE	TRUE	TRUE	TRUE
OWW14	FALSE	FALSE	TRUE	TRUE	TRUE	TRUE
OWW15	FALSE	TRUE	TRUE	TRUE	TRUE	TRUE
OWW16	FALSE	TRUE	TRUE	TRUE	TRUE	TRUE
PH01	FALSE	FALSE	TRUE	TRUE	TRUE	TRUE
PH02	FALSE	FALSE	TRUE	TRUE	TRUE	TRUE
PH03	FALSE	FALSE	TRUE	TRUE	TRUE	TRUE
PH04	FALSE	FALSE	TRUE	TRUE	TRUE	TRUE
PH05	FALSE	FALSE	TRUE	TRUE	TRUE	TRUE
PH06	FALSE	FALSE	TRUE	TRUE	TRUE	TRUE
PH07	FALSE	FALSE	TRUE	TRUE	TRUE	TRUE
PH08	FALSE	FALSE	TRUE	TRUE	TRUE	TRUE
PH09	FALSE	FALSE	TRUE	TRUE	TRUE	TRUE
PH10	FALSE	FALSE	FALSE	TRUE	TRUE	TRUE
PH11	FALSE	FALSE	TRUE	TRUE	TRUE	TRUE
PH12	FALSE	FALSE	TRUE	TRUE	TRUE	TRUE
PH13	FALSE	FALSE	TRUE	TRUE	TRUE	TRUE
PH14	FALSE	FALSE	TRUE	TRUE	TRUE	TRUE
PH15	FALSE	FALSE	TRUE	TRUE	TRUE	TRUE
PH16	FALSE	FALSE	TRUE	TRUE	TRUE	TRUE
PH17	FALSE	FALSE	TRUE	FALSE	TRUE	TRUE
PH18	FALSE	FALSE	TRUE	TRUE	TRUE	TRUE
PH19	FALSE	FALSE	TRUE	TRUE	TRUE	TRUE
PH20	FALSE	FALSE	TRUE	TRUE	TRUE	TRUE
PH21	FALSE	FALSE	TRUE	TRUE	TRUE	TRUE
PH22	FALSE	FALSE	FALSE	FALSE	TRUE	TRUE
PH24	FALSE	FALSE	FALSE	FALSE	TRUE	TRUE
SAC02	FALSE	FALSE	FALSE	FALSE	FALSE	FALSE
SAC03	FALSE	FALSE	FALSE	FALSE	FALSE	TRUE
SAC04	FALSE	FALSE	FALSE	FALSE	FALSE	FALSE
SAC05	FALSE	FALSE	FALSE	FALSE	FALSE	TRUE
SAC06	FALSE	FALSE	FALSE	FALSE	FALSE	FALSE
SAC07	FALSE	FALSE	FALSE	FALSE	FALSE	FALSE
SAC08	FALSE	FALSE	FALSE	FALSE	FALSE	FALSE
SAC09	FALSE	FALSE	FALSE	FALSE	FALSE	TRUE
SAC10	FALSE	FALSE	FALSE	FALSE	FALSE	FALSE
SAC11	FALSE	FALSE	FALSE	FALSE	FALSE	TRUE
SAC12	FALSE	FALSE	FALSE	FALSE	FALSE	FALSE
SAC13	FALSE	FALSE	FALSE	FALSE	FALSE	FALSE
SAC14	FALSE	FALSE	FALSE	FALSE	FALSE	TRUE
SAC15	FALSE	FALSE	FALSE	FALSE	FALSE	TRUE
SAC16	FALSE	FALSE	FALSE	FALSE	FALSE	FALSE
SNG01	FALSE	FALSE	FALSE	FALSE	TRUE	TRUE
SNG02	FALSE	FALSE	FALSE	TRUE	TRUE	TRUE
SP10	FALSE	TRUE	TRUE	TRUE	TRUE	TRUE
SP11	FALSE	TRUE	FALSE	TRUE	TRUE	TRUE
SP12	FALSE	TRUE	FALSE	TRUE	TRUE	TRUE
SP13	TRUE	TRUE	FALSE	TRUE	TRUE	TRUE
SP14	TRUE	TRUE	FALSE	FALSE	TRUE	TRUE
SP15	TRUE	FALSE	TRUE	TRUE	TRUE	TRUE
SP16	FALSE	TRUE	TRUE	TRUE	TRUE	TRUE
SP17	FALSE	TRUE	TRUE	TRUE	TRUE	TRUE
WEL01	FALSE	FALSE	TRUE	TRUE	TRUE	TRUE
WEL02	FALSE	FALSE	TRUE	TRUE	TRUE	TRUE
WEL03	FALSE	FALSE	TRUE	TRUE	TRUE	TRUE
WEL04	FALSE	FALSE	TRUE	FALSE	TRUE	TRUE
WEL05	FALSE	FALSE	TRUE	TRUE	TRUE	TRUE
WEL06	FALSE	FALSE	TRUE	TRUE	TRUE	TRUE
WEL07	FALSE	FALSE	TRUE	TRUE	TRUE	TRUE
WEL08	FALSE	FALSE	TRUE	FALSE	TRUE	TRUE
WEL09	FALSE	FALSE	TRUE	TRUE	TRUE	TRUE
WEL10	FALSE	FALSE	TRUE	TRUE	TRUE	TRUE
WEL11	FALSE	FALSE	TRUE	TRUE	TRUE	TRUE
WEL12	FALSE	FALSE	TRUE	FALSE	TRUE	TRUE
WEL13	FALSE	FALSE	TRUE	FALSE	TRUE	TRUE
WEL14	FALSE	FALSE	TRUE	TRUE	TRUE	TRUE
WEL15	FALSE	FALSE	TRUE	TRUE	TRUE	TRUE
WEL16	FALSE	FALSE	TRUE	TRUE	TRUE	FALSE
WEL17	FALSE	FALSE	TRUE	TRUE	TRUE	TRUE
WEL18	FALSE	FALSE	TRUE	TRUE	TRUE	TRUE
WEL19	FALSE	FALSE	TRUE	TRUE	TRUE	TRUE
WEL20	FALSE	FALSE	TRUE	TRUE	TRUE	TRUE
WEL22	FALSE	FALSE	TRUE	TRUE	TRUE	TRUE
WEL23	FALSE	FALSE	TRUE	TRUE	TRUE	TRUE
WEL24	FALSE	FALSE	TRUE	TRUE	TRUE	TRUE
WEL25	FALSE	FALSE	FALSE	FALSE	TRUE	TRUE
WEL26	FALSE	FALSE	TRUE	FALSE	TRUE	TRUE
WF01	FALSE	TRUE	TRUE	TRUE	TRUE	TRUE
WF02	FALSE	TRUE	TRUE	TRUE	TRUE	TRUE
WF04	FALSE	TRUE	TRUE	TRUE	TRUE	TRUE
WF05	FALSE	FALSE	FALSE	FALSE	TRUE	TRUE
WF06	FALSE	FALSE	FALSE	TRUE	TRUE	TRUE
WF07	FALSE	FALSE	FALSE	FALSE	TRUE	TRUE
WGP01	FALSE	FALSE	FALSE	FALSE	TRUE	TRUE
WGP02	FALSE	FALSE	FALSE	FALSE	TRUE	TRUE
WGP03	FALSE	FALSE	FALSE	FALSE	TRUE	TRUE
WGP04	FALSE	FALSE	FALSE	FALSE	TRUE	TRUE
WGP05	FALSE	FALSE	FALSE	FALSE	TRUE	TRUE
WGP06	FALSE	FALSE	FALSE	FALSE	TRUE	TRUE
WGP07	FALSE	FALSE	FALSE	FALSE	TRUE	TRUE
WGP08	FALSE	FALSE	FALSE	FALSE	TRUE	TRUE
WGP09	FALSE	FALSE	FALSE	FALSE	TRUE	TRUE
WGP10	FALSE	FALSE	FALSE	TRUE	TRUE	TRUE
WGP11	FALSE	FALSE	TRUE	FALSE	TRUE	TRUE
WGP12	FALSE	FALSE	FALSE	FALSE	TRUE	TRUE
WGP13	FALSE	FALSE	FALSE	FALSE	TRUE	TRUE
WGP14	FALSE	FALSE	FALSE	TRUE	TRUE	TRUE
WGP15	FALSE	TRUE	TRUE	TRUE	TRUE	TRUE
WGP16	FALSE	TRUE	TRUE	TRUE	TRUE	TRUE
WGP17	FALSE	FALSE	TRUE	TRUE	TRUE	TRUE
WGP18	FALSE	TRUE	TRUE	TRUE	TRUE	TRUE
WGP19	FALSE	FALSE	TRUE	FALSE	TRUE	TRUE
WGP20	FALSE	FALSE	TRUE	FALSE	TRUE	TRUE
WiW01	FALSE	FALSE	FALSE	TRUE	TRUE	TRUE
WiW02	FALSE	FALSE	FALSE	TRUE	TRUE	TRUE
WiW03	FALSE	FALSE	FALSE	TRUE	TRUE	TRUE
WiW04	FALSE	FALSE	TRUE	TRUE	TRUE	TRUE
WiW05	FALSE	TRUE	TRUE	TRUE	TRUE	TRUE
WiW06	FALSE	FALSE	FALSE	FALSE	TRUE	TRUE
WiW07	FALSE	FALSE	FALSE	FALSE	TRUE	TRUE
WiW08	FALSE	FALSE	FALSE	TRUE	TRUE	TRUE
WiW09	FALSE	FALSE	FALSE	TRUE	TRUE	TRUE
WiW10	FALSE	TRUE	TRUE	FALSE	TRUE	TRUE
WiW11	FALSE	FALSE	TRUE	TRUE	TRUE	TRUE
WiW12	FALSE	TRUE	TRUE	TRUE	TRUE	TRUE
WiW13	FALSE	TRUE	FALSE	TRUE	TRUE	TRUE
WiW14	FALSE	FALSE	FALSE	FALSE	TRUE	TRUE
WiW15	FALSE	FALSE	FALSE	FALSE	TRUE	TRUE
WiW16	FALSE	FALSE	FALSE	FALSE	TRUE	TRUE
WiW17	FALSE	FALSE	FALSE	FALSE	TRUE	TRUE
WiW18	FALSE	FALSE	FALSE	FALSE	TRUE	TRUE
WiW19	FALSE	FALSE	TRUE	FALSE	TRUE	TRUE
WiW20	FALSE	TRUE	TRUE	TRUE	TRUE	TRUE
WiW21	FALSE	FALSE	FALSE	TRUE	TRUE	TRUE
WiW22	FALSE	TRUE	TRUE	TRUE	TRUE	TRUE
WiW23	FALSE	FALSE	FALSE	FALSE	TRUE	TRUE
WiW24	FALSE	FALSE	FALSE	TRUE	TRUE	TRUE
WiW25	FALSE	FALSE	FALSE	TRUE	TRUE	TRUE
WiW26	FALSE	FALSE	FALSE	FALSE	TRUE	TRUE
WiW27	FALSE	TRUE	TRUE	TRUE	TRUE	TRUE
WiW28	FALSE	TRUE	TRUE	TRUE	TRUE	TRUE
WiW29	FALSE	FALSE	FALSE	FALSE	TRUE	TRUE
WiW30	FALSE	FALSE	TRUE	TRUE	TRUE	TRUE
WiW31	FALSE	FALSE	FALSE	TRUE	TRUE	TRUE
WiW32	FALSE	FALSE	FALSE	TRUE	TRUE	TRUE
WiW33	FALSE	FALSE	TRUE	TRUE	FALSE	TRUE
WiW34	FALSE	FALSE	TRUE	TRUE	FALSE	TRUE
WiW35	FALSE	TRUE	TRUE	TRUE	TRUE	TRUE
WiW36	FALSE	FALSE	TRUE	TRUE	TRUE	TRUE
WiW37	FALSE	FALSE	FALSE	TRUE	TRUE	TRUE
WiW38	FALSE	FALSE	TRUE	TRUE	TRUE	TRUE
WiW39	FALSE	FALSE	FALSE	TRUE	TRUE	TRUE
WiW40	FALSE	FALSE	FALSE	FALSE	TRUE	TRUE
WiW41	FALSE	FALSE	FALSE	TRUE	TRUE	TRUE
WiW42	FALSE	FALSE	TRUE	TRUE	TRUE	TRUE
WiW43	FALSE	TRUE	TRUE	TRUE	TRUE	TRUE
WiW44	FALSE	FALSE	TRUE	TRUE	TRUE	TRUE
WiW45	FALSE	FALSE	FALSE	FALSE	TRUE	TRUE
WiW46	FALSE	FALSE	FALSE	FALSE	TRUE	TRUE
WiW47	FALSE	FALSE	FALSE	TRUE	TRUE	TRUE
WiW48	FALSE	FALSE	TRUE	FALSE	TRUE	TRUE
WiW49	FALSE	FALSE	FALSE	FALSE	TRUE	TRUE
WiW50	FALSE	FALSE	TRUE	TRUE	FALSE	TRUE
WiW51	FALSE	FALSE	TRUE	TRUE	TRUE	TRUE
WiW52	FALSE	FALSE	TRUE	FALSE	TRUE	TRUE
WiW53	FALSE	FALSE	FALSE	FALSE	TRUE	TRUE
WiW54	FALSE	TRUE	FALSE	FALSE	TRUE	TRUE
WiW55	FALSE	TRUE	FALSE	TRUE	TRUE	TRUE
WiW56	FALSE	FALSE	TRUE	FALSE	TRUE	TRUE
WiW57	FALSE	FALSE	TRUE	TRUE	TRUE	TRUE
WP01	FALSE	FALSE	TRUE	FALSE	TRUE	TRUE
WP02	FALSE	FALSE	TRUE	FALSE	TRUE	TRUE
WP03	FALSE	FALSE	FALSE	FALSE	TRUE	TRUE
WP04	FALSE	FALSE	FALSE	FALSE	TRUE	TRUE
WP05	FALSE	FALSE	FALSE	FALSE	FALSE	TRUE
WP06	FALSE	FALSE	FALSE	FALSE	TRUE	TRUE
WP07	FALSE	FALSE	FALSE	FALSE	TRUE	TRUE
WP08	FALSE	FALSE	FALSE	FALSE	FALSE	TRUE
WP09	FALSE	FALSE	FALSE	FALSE	TRUE	TRUE
WP10	FALSE	FALSE	FALSE	FALSE	TRUE	TRUE
WP11	FALSE	FALSE	FALSE	FALSE	TRUE	TRUE
WP12	FALSE	FALSE	FALSE	FALSE	FALSE	FALSE
WP13	FALSE	FALSE	FALSE	FALSE	FALSE	TRUE
WP14	FALSE	FALSE	FALSE	FALSE	TRUE	TRUE
WP15	FALSE	FALSE	FALSE	FALSE	FALSE	TRUE
WP16	FALSE	FALSE	FALSE	FALSE	FALSE	FALSE
WYC01	FALSE	FALSE	FALSE	FALSE	FALSE	TRUE
WYC03	FALSE	FALSE	FALSE	TRUE	TRUE	TRUE
WYC04	FALSE	FALSE	FALSE	FALSE	TRUE	TRUE
WYC05	FALSE	TRUE	TRUE	TRUE	TRUE	TRUE
WYC06	FALSE	TRUE	FALSE	TRUE	TRUE	TRUE
WYC07	FALSE	TRUE	TRUE	TRUE	TRUE	TRUE
WYC08	FALSE	TRUE	TRUE	TRUE	TRUE	TRUE
WYC09	FALSE	FALSE	TRUE	FALSE	TRUE	TRUE
WYC10	FALSE	FALSE	FALSE	FALSE	TRUE	TRUE
WYC11	FALSE	FALSE	FALSE	FALSE	TRUE	TRUE
WYC12	FALSE	FALSE	TRUE	TRUE	TRUE	TRUE
WYC13	FALSE	FALSE	TRUE	TRUE	TRUE	TRUE
WYC16	FALSE	FALSE	TRUE	FALSE	TRUE	TRUE
WYC17	FALSE	TRUE	FALSE	TRUE	TRUE	TRUE
WYC18	FALSE	FALSE	FALSE	TRUE	TRUE	TRUE
WYC19	FALSE	TRUE	TRUE	TRUE	TRUE	TRUE
WYC20	FALSE	FALSE	TRUE	TRUE	TRUE	TRUE
WYC21	FALSE	TRUE	FALSE	TRUE	TRUE	TRUE
WYC22	FALSE	FALSE	FALSE	FALSE	TRUE	TRUE
WYC23	FALSE	TRUE	TRUE	TRUE	TRUE	TRUE
WYC24	FALSE	FALSE	FALSE	FALSE	TRUE	TRUE
WYC25	FALSE	FALSE	FALSE	TRUE	TRUE	TRUE
WYC27	FALSE	TRUE	TRUE	TRUE	TRUE	TRUE
WYC28	FALSE	FALSE	FALSE	FALSE	TRUE	TRUE
WYC29	FALSE	FALSE	FALSE	TRUE	TRUE	TRUE
WYC30	FALSE	TRUE	FALSE	TRUE	TRUE	TRUE
WYC31	FALSE	TRUE	FALSE	TRUE	TRUE	TRUE
WYC32	FALSE	TRUE	FALSE	TRUE	TRUE	TRUE
WYC33	FALSE	FALSE	FALSE	TRUE	TRUE	TRUE
WYC34	FALSE	FALSE	TRUE	TRUE	TRUE	TRUE
WYC35	FALSE	TRUE	TRUE	TRUE	TRUE	TRUE
WYC36	FALSE	FALSE	TRUE	TRUE	TRUE	TRUE
WYC37	FALSE	FALSE	TRUE	TRUE	TRUE	TRUE
WYC38	FALSE	FALSE	FALSE	FALSE	TRUE	TRUE
WYC39	FALSE	FALSE	FALSE	FALSE	TRUE	TRUE
WYC40	FALSE	TRUE	TRUE	TRUE	TRUE	TRUE
WYC43	FALSE	FALSE	TRUE	TRUE	TRUE	TRUE
WYD01	TRUE	TRUE	TRUE	TRUE	TRUE	TRUE
WYD02	FALSE	TRUE	TRUE	TRUE	TRUE	TRUE
WYD03	FALSE	FALSE	TRUE	FALSE	TRUE	TRUE
WYD04	FALSE	TRUE	TRUE	TRUE	TRUE	TRUE
WYD05	FALSE	TRUE	TRUE	TRUE	TRUE	TRUE
WYD07	FALSE	FALSE	TRUE	TRUE	TRUE	TRUE
WYD08	FALSE	TRUE	TRUE	TRUE	TRUE	TRUE
WYD10	TRUE	TRUE	TRUE	TRUE	TRUE	TRUE
WYD11	FALSE	FALSE	TRUE	TRUE	TRUE	TRUE
WYD12	TRUE	TRUE	TRUE	TRUE	TRUE	TRUE
WYM01	FALSE	FALSE	FALSE	TRUE	TRUE	TRUE
WYM03	FALSE	TRUE	TRUE	TRUE	TRUE	TRUE
WYM04	FALSE	FALSE	FALSE	FALSE	TRUE	TRUE
WYM05	FALSE	FALSE	FALSE	TRUE	TRUE	TRUE
WYM06	FALSE	FALSE	TRUE	TRUE	TRUE	TRUE
WYM07	FALSE	FALSE	FALSE	FALSE	TRUE	TRUE
WYM08	FALSE	TRUE	TRUE	TRUE	TRUE	TRUE
WYM09	FALSE	FALSE	FALSE	TRUE	TRUE	TRUE
WYM10	FALSE	FALSE	TRUE	TRUE	TRUE	TRUE
WYM11	FALSE	TRUE	TRUE	TRUE	TRUE	TRUE
WYM12	FALSE	FALSE	TRUE	FALSE	TRUE	TRUE
WYM13	FALSE	TRUE	TRUE	TRUE	TRUE	TRUE
WYM14	FALSE	FALSE	TRUE	TRUE	TRUE	TRUE
WYM15	FALSE	FALSE	FALSE	TRUE	TRUE	TRUE
WYM16	FALSE	FALSE	FALSE	TRUE	TRUE	TRUE
WYM17	FALSE	FALSE	FALSE	TRUE	TRUE	TRUE
WYM18	FALSE	FALSE	FALSE	FALSE	TRUE	TRUE
WYM19	FALSE	FALSE	FALSE	FALSE	TRUE	TRUE
WYM20	FALSE	FALSE	TRUE	TRUE	TRUE	TRUE
WYM24	FALSE	FALSE	TRUE	FALSE	TRUE	TRUE
WYM26	FALSE	FALSE	FALSE	FALSE	TRUE	TRUE
WYM28	FALSE	TRUE	TRUE	TRUE	TRUE	TRUE
WYM30	FALSE	TRUE	TRUE	TRUE	TRUE	TRUE
WYM31	FALSE	FALSE	TRUE	TRUE	TRUE	TRUE
WYM32	FALSE	FALSE	TRUE	TRUE	TRUE	TRUE
WYM34	FALSE	TRUE	TRUE	TRUE	TRUE	TRUE
WYM35	FALSE	FALSE	FALSE	FALSE	TRUE	TRUE
WYM36	FALSE	FALSE	FALSE	FALSE	TRUE	TRUE
WYM37	FALSE	TRUE	TRUE	TRUE	TRUE	TRUE
WYM38	FALSE	TRUE	TRUE	TRUE	TRUE	TRUE
WYM40	FALSE	TRUE	TRUE	TRUE	TRUE	TRUE
WYM41	FALSE	FALSE	TRUE	TRUE	TRUE	TRUE
WYM42	FALSE	FALSE	FALSE	TRUE	TRUE	TRUE
WYM43	FALSE	TRUE	FALSE	FALSE	TRUE	FALSE
WYM44	FALSE	FALSE	FALSE	FALSE	FALSE	FALSE
WYT01	FALSE	FALSE	FALSE	FALSE	TRUE	TRUE
WYT02	FALSE	TRUE	TRUE	TRUE	TRUE	TRUE
WYT03	FALSE	FALSE	FALSE	TRUE	TRUE	TRUE
WYT04	FALSE	FALSE	TRUE	TRUE	TRUE	TRUE
WYT05	FALSE	TRUE	TRUE	TRUE	TRUE	TRUE
WYT06	FALSE	TRUE	TRUE	TRUE	TRUE	TRUE
WYT07	FALSE	TRUE	TRUE	TRUE	TRUE	TRUE
WYT08	FALSE	TRUE	TRUE	TRUE	TRUE	TRUE
WYT09	FALSE	FALSE	FALSE	TRUE	TRUE	TRUE
WYT10	FALSE	FALSE	FALSE	TRUE	TRUE	TRUE
WYT100	TRUE	TRUE	TRUE	TRUE	TRUE	TRUE
WYT101	FALSE	FALSE	FALSE	TRUE	TRUE	TRUE
WYT102	FALSE	FALSE	TRUE	TRUE	TRUE	TRUE
WYT103	FALSE	TRUE	TRUE	TRUE	TRUE	TRUE
WYT104	FALSE	FALSE	TRUE	TRUE	TRUE	TRUE
WYT105	FALSE	TRUE	TRUE	TRUE	TRUE	FALSE
WYT106	FALSE	TRUE	TRUE	TRUE	TRUE	TRUE
WYT107	FALSE	TRUE	TRUE	TRUE	TRUE	TRUE
WYT108	FALSE	FALSE	TRUE	TRUE	TRUE	TRUE
WYT109	FALSE	FALSE	TRUE	TRUE	TRUE	TRUE
WYT110	FALSE	TRUE	TRUE	TRUE	TRUE	TRUE
WYT111	FALSE	TRUE	TRUE	TRUE	TRUE	TRUE
WYT112	FALSE	FALSE	FALSE	TRUE	TRUE	TRUE
WYT113	FALSE	FALSE	TRUE	FALSE	TRUE	TRUE
WYT114	FALSE	FALSE	TRUE	FALSE	TRUE	TRUE
WYT115	FALSE	FALSE	FALSE	TRUE	TRUE	TRUE
WYT13	FALSE	TRUE	TRUE	TRUE	TRUE	TRUE
WYT14	FALSE	TRUE	TRUE	TRUE	TRUE	TRUE
WYT15	FALSE	FALSE	TRUE	TRUE	TRUE	TRUE
WYT16	FALSE	TRUE	TRUE	TRUE	TRUE	TRUE
WYT17	FALSE	TRUE	TRUE	TRUE	TRUE	TRUE
WYT19	FALSE	FALSE	TRUE	TRUE	TRUE	TRUE
WYT20	FALSE	FALSE	FALSE	FALSE	TRUE	TRUE
WYT21	FALSE	TRUE	TRUE	FALSE	TRUE	TRUE
WYT22	FALSE	TRUE	TRUE	TRUE	TRUE	TRUE
WYT23	TRUE	TRUE	TRUE	TRUE	TRUE	TRUE
WYT24	TRUE	TRUE	TRUE	TRUE	TRUE	TRUE
WYT25	FALSE	TRUE	TRUE	TRUE	TRUE	TRUE
WYT26	FALSE	TRUE	TRUE	TRUE	TRUE	TRUE
WYT27	FALSE	FALSE	TRUE	FALSE	TRUE	TRUE
WYT28	FALSE	FALSE	FALSE	FALSE	TRUE	TRUE
WYT29	FALSE	FALSE	FALSE	FALSE	FALSE	TRUE
WYT30	TRUE	TRUE	TRUE	TRUE	TRUE	TRUE
WYT31	TRUE	TRUE	TRUE	TRUE	TRUE	TRUE
WYT32	FALSE	FALSE	FALSE	FALSE	TRUE	TRUE
WYT33	FALSE	TRUE	TRUE	TRUE	TRUE	TRUE
WYT34	FALSE	TRUE	TRUE	TRUE	TRUE	TRUE
WYT36	FALSE	FALSE	TRUE	FALSE	TRUE	TRUE
WYT37	FALSE	FALSE	TRUE	FALSE	TRUE	TRUE
WYT38	FALSE	TRUE	TRUE	TRUE	TRUE	TRUE
WYT39	FALSE	TRUE	TRUE	TRUE	TRUE	TRUE
WYT40	FALSE	TRUE	TRUE	TRUE	TRUE	TRUE
WYT41	FALSE	FALSE	TRUE	TRUE	TRUE	TRUE
WYT42	FALSE	TRUE	TRUE	TRUE	TRUE	TRUE
WYT43	FALSE	TRUE	TRUE	TRUE	TRUE	TRUE
WYT44	FALSE	TRUE	TRUE	TRUE	TRUE	TRUE
WYT45	FALSE	TRUE	TRUE	TRUE	TRUE	TRUE
WYT46	FALSE	TRUE	TRUE	TRUE	TRUE	TRUE
WYT47	FALSE	FALSE	FALSE	TRUE	TRUE	TRUE
WYT48	FALSE	TRUE	TRUE	TRUE	TRUE	TRUE
WYT49	FALSE	TRUE	TRUE	TRUE	TRUE	TRUE
WYT50	TRUE	TRUE	TRUE	TRUE	TRUE	TRUE
WYT51	FALSE	TRUE	TRUE	TRUE	TRUE	TRUE
WYT52	FALSE	TRUE	TRUE	TRUE	TRUE	TRUE
WYT53	FALSE	TRUE	TRUE	TRUE	TRUE	TRUE
WYT54	FALSE	TRUE	TRUE	TRUE	TRUE	TRUE
WYT55	FALSE	FALSE	TRUE	TRUE	TRUE	TRUE
WYT56	FALSE	FALSE	TRUE	TRUE	TRUE	TRUE
WYT57	FALSE	FALSE	FALSE	TRUE	TRUE	TRUE
WYT58	FALSE	TRUE	TRUE	TRUE	TRUE	TRUE
WYT59	FALSE	FALSE	FALSE	TRUE	TRUE	TRUE
WYT60	FALSE	FALSE	FALSE	FALSE	TRUE	TRUE
WYT61	FALSE	FALSE	FALSE	FALSE	TRUE	TRUE
WYT62	FALSE	FALSE	FALSE	FALSE	FALSE	TRUE
WYT64	FALSE	FALSE	TRUE	TRUE	TRUE	TRUE
WYT65	FALSE	FALSE	TRUE	TRUE	TRUE	TRUE
WYT66	FALSE	FALSE	TRUE	TRUE	TRUE	TRUE
WYT67	FALSE	FALSE	TRUE	TRUE	TRUE	TRUE
WYT69	FALSE	TRUE	TRUE	TRUE	TRUE	FALSE
WYT71	FALSE	FALSE	FALSE	TRUE	TRUE	TRUE
WYT72	FALSE	TRUE	TRUE	TRUE	TRUE	TRUE
WYT73	FALSE	TRUE	TRUE	TRUE	TRUE	TRUE
WYT74	FALSE	TRUE	TRUE	TRUE	TRUE	TRUE
WYT75	FALSE	FALSE	TRUE	TRUE	TRUE	TRUE
WYT76	FALSE	TRUE	TRUE	TRUE	TRUE	TRUE
WYT77	FALSE	TRUE	TRUE	TRUE	TRUE	TRUE
WYT78	FALSE	TRUE	TRUE	TRUE	TRUE	TRUE
WYT79	FALSE	TRUE	TRUE	TRUE	TRUE	TRUE
WYT80	FALSE	TRUE	TRUE	TRUE	TRUE	TRUE
WYT81	FALSE	TRUE	TRUE	TRUE	TRUE	TRUE
WYT82	TRUE	TRUE	TRUE	TRUE	TRUE	TRUE
WYT83	TRUE	TRUE	TRUE	TRUE	TRUE	TRUE
WYT84	FALSE	FALSE	FALSE	FALSE	TRUE	TRUE
WYT85	FALSE	FALSE	TRUE	TRUE	TRUE	TRUE
WYT86	FALSE	FALSE	FALSE	FALSE	TRUE	TRUE
WYT88	FALSE	TRUE	TRUE	TRUE	TRUE	TRUE
WYT89	FALSE	TRUE	TRUE	TRUE	TRUE	FALSE
WYT90	FALSE	TRUE	TRUE	TRUE	TRUE	FALSE
WYT91	FALSE	FALSE	TRUE	TRUE	TRUE	TRUE
WYT92	FALSE	FALSE	FALSE	TRUE	TRUE	TRUE
WYT93	FALSE	FALSE	FALSE	TRUE	TRUE	TRUE
WYT96	FALSE	TRUE	TRUE	TRUE	TRUE	TRUE
WYT97	FALSE	TRUE	TRUE	TRUE	TRUE	TRUE
WYT99	FALSE	TRUE	TRUE	TRUE	TRUE	TRUE
