# Supplementary material for: Relationships between community composition, productivity and invasion resistance in semi-natural bacterial microcosms
Source: eLife. 2021 Oct 18;10:e71811. doi: 10.7554/eLife.71811 (PMC8523168; doi:10.7554/eLife.71811)
Supplement: Figure 2—source data 1. [file elife-71811-fig2-data1.csv]

	invader	timepoint	varexp
1	sbw25	24	59.37
2	sbw25	96	45.74
3	sbw25	168	40.4
4	kt2440	24	44.73
5	kt2440	96	14.45
6	kt2440	168	8.14
