# Supplementary material for: Relationships between community composition, productivity and invasion resistance in semi-natural bacterial microcosms
Source: eLife. 2021 Oct 18;10:e71811. doi: 10.7554/eLife.71811 (PMC8523168; doi:10.7554/eLife.71811)
Supplement: Figure 2—source data 2. — The invader survival data columns are labelled in the format ‘invader identity.cell density per ml.hours since invasion’. [file elife-71811-fig2-data2.csv]

	Overall	Overall	Overall	NA	Overall	Overall	Overall
C1	4.8541086138646	1.48548396934593	5.33096250452658	NA	-0.128989235486676	1.98512860416962	0.528016769525563
C2	10.8555958359645	8.0600195763321	10.9363616665939	NA	5.41062311879464	2.54973277573094	3.3293747875895
C3	2.04155191897323	3.28988618965783	3.41640427390537	NA	0.462207253367156	2.9486098063774	3.29101234758383
C5	17.1850447956042	15.0033191547278	8.66259756516853	NA	11.1404379629599	3.59584081917262	2.13122322083466
C8	7.29380961140925	4.91858819335898	3.33344956521974	NA	6.36286039820119	1.2339905692973	4.25482267879767
C13	2.0038650776776	1.58801985290732	3.96511793664535	NA	3.92988998309779	-0.758191428355407	-1.96629716754492
C14	10.8462018468795	4.71487140262261	13.0978294247117	NA	14.5969974069848	2.31545978232821	6.3356751933688
C16	15.1496050729563	9.83522809244194	8.31691384140876	NA	10.3487154559935	3.3960017127473	6.8459623633927
C17	8.33813908502866	7.28710737988083	4.36093544693398	NA	6.15184828602894	1.16258844484925	2.9865732565091
C18	25.1621188703362	29.0705159409444	15.4750256085812	NA	20.0575660671172	10.3090042129338	7.07493134548299
C20	18.4669736938865	12.0225841868145	9.18386926136032	NA	10.3322256687535	4.26891592760574	4.50783532373428
C22	0.841835493270065	0.902414443620676	3.89094347939099	NA	1.9919590971325	3.64554873931417	6.08822492830094
C23	8.29857790635374	4.35349058515372	3.18427733041731	NA	4.94081497891525	3.34536248497001	2.71710162189914
C24	2.58570566591605	-1.69595500404822	3.37780336440877	NA	1.92940320509702	1.34869966935865	-1.39683062415237
C27	6.5913180959718	5.7305779296611	5.17303333741243	NA	5.98445609113229	3.1938060426112	6.35219018214105
C28	8.39152200877978	13.8659718437324	7.48910621827797	NA	9.68483166805915	4.38277643434403	7.81675872833304
C35	1.27084339628989	1.36955117567059	-1.2115379046335	NA	0.790934084642631	7.31820005538108	3.3488734069163
C39	7.46630060494683	7.88215201518442	15.9795609094642	NA	5.57183347420813	4.2317054952439	3.70473317418603
C45	8.51847166523233	8.27117523343377	6.34304692031187	NA	4.56910895846151	5.77987827383931	0.976501400216601
Total	12.4059094648946	9.11632029611918	7.03551345527468	NA	9.17552060194354	5.88048212241991	9.03092437077768
simp	18.476206480765	9.91811365873354	9.89408774097014	NA	9.72070383241693	4.12944727794298	5.93682843048576
rao	8.2935840019474	7.52690953062537	7.98348139416474	NA	6.72494675803295	4.19228887575418	8.22151758275681
phydist	9.90426597033495	9.67679570210492	8.37357488887264	NA	7.3971778979808	4.84447183672125	4.80712834706208
mgCO2.7	24.7985811166739	33.8461967448279	26.5804062065294	NA	26.3173911792828	10.119351937771	11.831935054604
mgCO2.14	12.0696429150694	29.3170591502813	20.702337267567	NA	29.8210599717665	12.3828116093306	3.35853366598892
CPM7	50.2849414649878	34.6315142966734	17.5643874874333	NA	17.5849222816024	11.1992852863338	11.3057232422173
CPM14	27.5225114290022	26.8283785674488	41.4542320777215	NA	42.2453620705179	15.0976944769395	19.8641203485747
ATP7	5.79860505245006	7.24619301938586	4.70396174706571	NA	11.1066161439591	2.83491685452515	5.94154674919893
ATP14	4.71072631491362	4.17701313243945	4.56560088535301	NA	6.67615083231004	2.36168671707637	4.87772597050245
mG7	13.5396372608417	6.57637290119886	7.80452446993309	NA	6.78981092646793	4.0363598627458	14.5105215344017
mG14	3.60687781418182	4.32674630069641	3.62789757726288	NA	4.71457465182798	5.86025529582232	3.35562670604366
mN7	2.18903923385835	2.82334849956666	2.53453501978778	NA	5.38267884140292	5.30688544528491	2.14614319442856
mN14	6.85076206888126	3.51932624200854	3.58103468007831	NA	7.24470329295393	4.44818745445011	3.07014945306153
mX7	14.478159521074	8.02600029600468	10.2209310209315	NA	5.96030515158224	3.91714137255218	6.88660517738679
mX14	6.00645555842308	5.80037792963254	7.4953063663082	NA	5.77248033231874	9.17427397507226	5.60303478009904
mP7	6.88301300084211	5.48039009522399	10.7341724593341	NA	8.04841703398931	4.56964781204443	12.1154602437808
mP14	4.69271945743693	2.30927029529776	4.28150217336924	NA	5.60146080958314	2.06622564152836	5.46718998424581
