# Supplementary material for: Relationships between community composition, productivity and invasion resistance in semi-natural bacterial microcosms
Source: eLife. 2021 Oct 18;10:e71811. doi: 10.7554/eLife.71811 (PMC8523168; doi:10.7554/eLife.71811)
Supplement: Figure 3—source data 2. [file elife-71811-fig3-data2.csv]

community	simp	rao	sbw25_phydist	kt2440_phydist
AE01	0.85171976799787	0.0309264629509188	0.449460406517692	0.455023072067039
AE02	0.836414499305505	0.0264515808617583	0.380573001550292	0.373707904316011
AE03	0.700442980795001	0.0322063192644334	0.498632002029004	0.50285705263472
AE04	0.823858112152031	0.0320678856066805	0.47566185750479	0.475974231539269
AE06	0.84972097284691	0.0398900088508282	0.557347135057472	0.561415065592204
AE07	0.832184797821407	0.0351038288608709	0.583388382100053	0.567542182516936
AE08	0.884976017413583	0.033950410150544	0.461297537799632	0.462594053841426
AE09	0.763377005774522	0.0260347991313999	0.406175425585566	0.404396200997422
AE10	0.65486437373258	0.0295553093664349	0.501926117465312	0.502914813437447
AE102	0.887036266278717	0.0215281174172438	0.279483389125986	0.282302801870797
AE104	0.801318658166215	0.0290782983787037	0.445313814663216	0.448097910431589
AE105	0.666539943681424	0.0193922835629842	0.708140566143716	0.67680222842017
AE106	0.743740695531553	0.0126626053026665	0.167882893833815	0.178037318104127
AE108	0.696175944585178	0.01582570777473	0.234063969152295	0.227906405149379
AE109	0.898040022599553	0.0317972678714555	0.449222173628373	0.450309160654743
AE11	0.790857896011643	0.0362151814007274	0.729393090903959	0.70951886488623
AE111	0.888174631402277	0.0294276215693179	0.409099999877331	0.410521070289499
AE112	0.61271647983963	0.0263620211734051	0.509817819042384	0.509636001404665
AE113	0.72507603573048	0.0253061600678782	0.721316024716966	0.694805814968456
AE114	0.836783715748578	0.0219353200784013	0.31052502132276	0.324123325826724
AE115	0.731208689851438	0.0073416564928982	0.0959050593570218	0.131261210896783
AE117	0.254855534183218	0.00931108831505771	0.312633148463175	0.330787645466846
AE118	0.360762084054457	0.0154729829017787	0.356511981654533	0.369868073439201
AE119	0.17586983371358	0.00705916439233753	0.305163484652666	0.323743536293242
AE120	0.447040300191568	0.00866674892306406	0.281499876399395	0.300057919969742
AE122	0.288932022948224	0.0119802995116343	0.761894182646422	0.73333992475984
AE123	0.413331243188558	0.01620200066799	0.348847938788702	0.362218494602805
AE124	0.615739842673504	0.0207645681505799	0.373340054816171	0.383356555564797
AE125	0.721140591266867	0.0233299715779176	0.738001440896007	0.710182391957539
AE127	0.582996120848367	0.0152727445825274	0.33024781749727	0.345779383226992
AE128	0.30184669272086	0.0119034967734864	0.327583792067577	0.343419820149921
AE129	0.771801159976292	0.180474856259344	2.41397217858955	2.41877461891877
AE13	0.910123338356996	0.0431553206975814	0.62222883183937	0.610347398589698
AE130	0.282581110054018	0.0114828333905807	0.329111067919884	0.345442473984558
AE131	0.587935944537633	0.023150650696771	0.397182469083341	0.403196215072413
AE133	0.300934176356796	0.00802204354675845	0.286682167329687	0.305470813276976
AE134	0.468304707860814	0.0171599552654425	0.352497799818525	0.362361357088015
AE135	0.416063500202029	0.0130136056412968	0.315346103698812	0.33106853698811
AE136	0.70299580604665	0.0376403345374576	0.631842035951198	0.623090602523099
AE137	0.3989336635949	0.0168677115455598	0.366718917462979	0.377983184856105
AE139	0.732548110430073	0.189071118005786	2.53984344251382	2.54376763793298
AE14	0.820395180325073	0.0304543493913428	0.449872044310287	0.434857072787333
AE143	0.736802395222092	0.027851649643651	0.654194190661015	0.631665595151371
AE144	0.737232151298041	0.12762707694652	1.59819796767931	1.6010723812243
AE145	0.667378935094922	0.0124330565617124	0.19950842512275	0.227836791150338
AE146	0.196241435193743	0.0073346645440433	0.304500949241147	0.322947656604834
AE147	0.27037100611841	0.0128603383174715	0.345432564663435	0.360526624422144
AE149	0.648974438909895	0.0184919649148045	0.917796069554683	0.886452051075433
AE15	0.736423340326429	0.030693455677142	0.563891327919094	0.560360680968434
AE150	0.436847906062234	0.0158835706164728	0.662189751284811	0.633812291860883
AE151	0.617299046054428	0.0249128369164851	0.608014782210369	0.587308371100546
AE152	0.508082608560557	0.0235944189638383	0.839060284149486	0.807897016811154
AE153	0.559375138363061	0.0241604207935009	0.773062379743656	0.751864447976879
AE154	0.316163883672322	0.0157672368920204	0.366522213234456	0.380090829549343
AE156	0.779039129388237	0.0234926259968379	0.33725808841723	0.323777321775154
AE157	0.426335729259371	0.0179834149855712	0.704041113274437	0.678620303021778
AE158	0.638746574082	0.0146713739183164	0.330958121212122	0.345872612376151
AE159	0.805470806183992	0.0282425783164281	0.442475573309257	0.447387609133803
AE16	0.860927029227881	0.0341522979523308	0.471889286492848	0.478394837059515
AE160	0.646077808094747	0.0343866361764644	0.594632845746945	0.600685307654891
AE161	0.329825569784677	0.0153575003878015	0.783113335400096	0.757918833762285
AE162	0.62153912241705	0.019684938306716	0.391214099109827	0.402593758405624
AE163	0.614649470776912	0.0268903735759929	0.777250503257425	0.750050745344481
AE164	0.347207500487919	0.0134717381756164	0.3503539554172	0.365652662238034
AE165	0.786975275180942	0.0263990990019422	0.388205406408666	0.395589445334536
AE166	0.36544928732847	0.01466031292168	0.342650211400111	0.35470342755949
AE167	0.439302197133586	0.0185399592898695	0.378980040406978	0.38848880494186
AE168	0.517785896525374	0.0220505733998141	0.393542495093006	0.399860249629122
AE169	0.599620890411217	0.0310291389638396	0.504248943980656	0.50463110559042
AE17	0.76738957934573	0.0344151912037419	0.532358094785605	0.533843608148236
AE170	0.677371799284914	0.0228340683464285	0.762995523616963	0.732829316764955
AE171	0.651790768943879	0.0294440652135085	0.496923139223163	0.499759800131062
AE173	0.764897730723333	0.0214304702202881	0.340726682603983	0.335102412791692
AE174	0.361547716647381	0.00999506274930235	0.285075249202734	0.30244837949886
AE175	0.483362011152818	0.0299887706226125	0.491426039132674	0.501567995823559
AE176	0.142774006396343	0.00585378346153173	0.299617382891827	0.318969692892393
AE177	0.515005979022148	0.0232964091783022	0.424835147065438	0.430829292669215
AE178	0.847113925304144	0.0312969029433359	0.43946415389362	0.44578972874244
AE18	0.698800540939635	0.0271978901162245	0.846520284357412	0.815124303001877
AE19	0.740665958575046	0.0233366125800983	0.332852130647924	0.327825658555312
AE20	0.666214455578891	0.0325813437680761	0.757493374574282	0.735601240223136
AE21	0.778401523544392	0.0408700421452528	0.633131614668892	0.625061694879364
AE24	0.835646199544912	0.036475943911819	0.573652108933239	0.570275127346163
AE25	0.837591917009266	0.0320516329778123	0.461985297057615	0.467004904563341
AE28	0.777768402956376	0.0260083206470724	0.436966970427298	0.426919519151552
AE29	0.778228441686901	0.0373660791473297	0.586643722403185	0.57534043153577
AE30	0.818997946873696	0.0279082426331572	0.426185078373533	0.434061185551507
AE31	0.645769538276652	0.0289765345278786	0.505427553656167	0.506173717569036
AE32	0.791325550568215	0.0285315763473242	0.485838956707644	0.474481090622959
AE33	0.761746978257541	0.0272778891964397	0.427106618795461	0.41902195466977
AE34	0.787477786574763	0.162868412827331	2.13027944083817	2.11704963876552
AE35	0.816109397917399	0.13765971639835	1.73186478247787	1.72410833811701
AE36	0.657511982695328	0.0340182750748088	0.820994838787324	0.795276431371426
AE37	0.830738335590128	0.0384056470442194	0.583594076483751	0.583545009597268
AE38	0.767597464254071	0.0289470119801513	0.496427335937967	0.498585365105875
AE39	0.784538390148303	0.0358830649085414	0.581758982644111	0.580038186403509
AE40	0.762193479436674	0.0752976189568406	0.995991631984927	0.99452397780133
AE41	0.634712889771359	0.0364637352712007	0.668467824703718	0.660357123863768
AE42	0.607784541987308	0.0504947800360649	0.768695020596674	0.76546517114171
AE43	0.844939283463902	0.0382444940812552	0.585370171907234	0.582158567168844
AE44	0.893845564707588	0.0284408820808	0.386391791083555	0.391901078889872
AE45	0.890542530232325	0.0374155316219739	0.543999601000245	0.543281553549646
AE46	0.704638450744054	0.0288970501482049	0.502175632432124	0.496870927769504
AE47	0.891778592651903	0.0278641041176383	0.38849700513638	0.381882665544928
AE48	0.834385616213948	0.0378453531296418	0.524120915904397	0.531606727825317
AE49	0.777517339613963	0.0310366393943401	0.446696325797794	0.455877039248434
AE51	0.849802650035244	0.0274292776814048	0.402533473921879	0.407439846240686
AE53	0.770127417715008	0.0391602343527537	0.646446093265726	0.638095979204649
AE54	0.817215471564583	0.0288045345624683	0.444331321913382	0.449679730857378
AE55	0.745910768872367	0.0312251258142195	0.50128104617183	0.503892903915839
AE56	0.806828409647246	0.0314644798720696	0.500563781266173	0.489012004887586
AE57	0.819522174054226	0.042514279806083	0.754960477921921	0.735776648395153
AE58	0.685386509007168	0.030817359159774	0.549193670576506	0.548525519910855
AE59	0.72016800276143	0.0388765341504313	0.614684722783782	0.609654092947601
AE60	0.777393200811391	0.0702583786863682	0.921126214388823	0.925451089439344
AE61	0.836080234291351	0.0270697345425249	0.381725108384932	0.389104257218911
AE62	0.837507331896557	0.0237761628348384	0.308605137807947	0.312138772836327
AE63	0.755414856095214	0.0648645182108378	0.918070030035637	0.909274926862379
AE64	0.817877654948846	0.0382696079502534	0.650198664996464	0.630401612296629
AE65	0.857190659458627	0.0351952206949217	0.528333193104692	0.526847557390834
AE66	0.590278507295453	0.0297153152707346	0.387242853043681	0.405785267193308
AE67	0.654177942083138	0.0258898797818114	0.373847682916617	0.385703497607369
AE68	0.126938349123488	0.0055300824135525	0.846592559194268	0.816691225160654
AE69	0.819916919781392	0.028921706392626	0.440116766360329	0.431801986183926
AE70	0.859382716017865	0.0359796408013288	0.524087635041151	0.519007582995248
AE71	0.824055677646463	0.0622812708222777	0.752339417975158	0.748555567729083
AE72	0.810553765065563	0.0312980605044038	0.474065523783588	0.468273028382958
AE73	0.898522659047636	0.0338090929233903	0.47706909561827	0.47220355421463
AE74	0.911898978747961	0.0345049691604817	0.479075800186451	0.466501647545059
AE76	0.905544624789356	0.038892855859447	0.568292162038509	0.55873234511025
AE77	0.862200251345626	0.0314464293691805	0.473467377808664	0.468814819087329
AE78	0.803366259328117	0.0327178606758089	0.545180969345046	0.547244258798561
AE79	0.788134866493621	0.0279998901477357	0.418683790167076	0.419028044733217
AE80	0.772908185251583	0.024278416170829	0.35937162968477	0.372805792219561
AE81	0.790823250185223	0.0767292720326155	0.91458723136063	0.932641709756242
AE82	0.818570672444445	0.0277285421279298	0.458508339982032	0.462939246301288
AE83	0.676094366657089	0.0322827001158329	0.677666174871463	0.663424042668874
AE84	0.667597333146917	0.0200447173715261	0.322464090458127	0.33572139334695
AE85	0.840122556350913	0.0301184865035447	0.467276146598057	0.45911731995426
AE86	0.764123250656864	0.0206772967010526	0.330177954746137	0.331578871558034
AE87	0.687846056742366	0.0162510775266506	0.276998568109312	0.298365438451814
AE88	0.859846671613755	0.0221409786403885	0.316253099405321	0.319203121502347
AE89	0.850951747536036	0.0269445826350926	0.382266970724655	0.376555131618577
AE90	0.849637747124346	0.0444363808408686	0.662907116524703	0.645527235775128
AE91	0.860629025939382	0.131734328269342	1.60859497399815	1.60581660325457
AE94	0.75351629619742	0.0149531006207269	0.253158215545852	0.263274578922852
AE96	0.724428640803734	0.0195424670398806	0.3226020048243	0.329561727873734
AE99	0.864836179930796	0.024951995753134	0.325600202529412	0.330629266294117
BB02	0.833866308863071	0.034040473083456	0.578545787208821	0.563499660304665
BB04	0.373579113612409	0.0167421008736754	0.369058028532915	0.382786678274544
BB05	0.79709820537171	0.0175529069619466	0.313192565299146	0.331619392649572
BB06	0.851140091754974	0.0286300751454555	0.404841553796351	0.402628355208946
BB07	0.849758006486377	0.0220422844092656	0.333601313284865	0.345998957038995
BB08	0.324788103766622	0.00949717320809169	0.837817633678669	0.808286015854846
BB09	0.778014176385126	0.0157337297619972	0.313013432921859	0.322580244730406
BB10	0.938275678364722	0.0446909265235705	0.606842641016378	0.604829300818882
BB11	0.684725728624761	0.0230057468700483	0.435954066804765	0.44443575694804
BB12	0.723616701356145	0.0178674558773638	0.279081882461137	0.287853546754479
BB14	0.71337970456594	0.0139212666352914	0.36943167879602	0.386830465107759
BB15	0.674116855427292	0.00809706332235908	0.299983333771054	0.318145688952326
BB16	0.654867891982399	0.0299807483649253	0.602301905199625	0.594506282684535
BB17	0.639397551433514	0.0101729008797495	0.181574133771688	0.209902812189191
BB18	0.455731845791741	0.0301333633502415	0.817035475481069	0.801387584786412
BB20	0.215098132892465	0.00477550134131364	0.303106713121571	0.322890546538056
BB21	0.414917985347903	0.0137029766183084	0.180815751381524	0.210102462796538
BB23	0.870502952471273	0.0266749440670167	0.456664467459103	0.459672316582322
BB24	0.138325875808265	0.00549320629614874	0.297141680750163	0.316576468743263
BB25	0.784561304879585	0.0194871077542667	0.305401510781135	0.313431109176764
BB26	0.727431361982324	0.00755150458306225	0.123269274852185	0.122391346632037
BB33	0.794141389499746	0.0281307405910019	0.407839646408527	0.40927852451953
BB34	0.867082135632502	0.0351601154743754	0.782205606415605	0.755159978594211
BB36	0.788223397145025	0.0199858385695462	0.252780880552813	0.260407999128969
BB37	0.79640159457369	0.0158464277060839	0.238506993411079	0.214273825481049
BB38	0.627048920548258	0.0254074406489353	0.775384139304643	0.747076590355833
BB39	0.738881936543147	0.0381969204431235	0.634848895033798	0.618913429473214
BB43	0.627466989218349	0.02002467785752	0.503976013449455	0.484601261602911
BB44	0.640124644399284	0.00826804041959517	0.134700887565988	0.141918490958103
BB45	0.743245381494758	0.0346465786468162	0.597535885825868	0.582044086606938
BB46	0.932975994911191	0.0357658021507719	0.466839824158847	0.463941296578164
BB47	0.913624261553684	0.0381518118632611	0.485944003036232	0.483137062411443
BB48	0.292753791851202	0.010196326080453	0.652827221935195	0.623583929915202
BB49	0.950693082843734	0.039677598605265	0.57771313515088	0.565235976465105
BB50	0.651705090098039	0.0263476707457545	0.7898670235596	0.759515938885002
BB51	0.772288845519889	0.0190562776842975	0.268861668627451	0.248810202883505
BB53	0.147795652242361	0.014605638019624	0.828558456595144	0.799103670406275
BB54	0.831341922887081	0.133210967311665	1.6296818922152	1.63016036128672
BB55	0.928461697448545	0.0438049409817927	0.87738299537788	0.846957982403504
BB56	0.926891098086132	0.0381310468334561	0.514616571191675	0.507242140839432
BB59	0.164709133380294	0.00708304504281126	0.843403315398997	0.813296189683375
BB62	0.919001970501535	0.0460111698953693	0.748368641004135	0.727804676771914
BB65	0.824078331449008	0.0217369688036408	0.284773668264733	0.291989785079512
BB67	0.849964292112849	0.0351462791714733	0.438558396877761	0.440152188630338
BB68	0.388994804987789	0.00720776536233427	0.799348355263888	0.769429731738385
BB69	0.831375295535526	0.0226660971367955	0.291770791818502	0.297030830845185
BB70	0.804567743567383	0.0231771823305497	0.288010848797446	0.295706343725064
BB71	0.098877355064598	0.00302894229217754	0.673545316999579	0.642079416752159
BB72	0.26632262554117	0.0113132450955459	0.820862338480026	0.791546944607992
BB73	0.827295728655803	0.0265835376120533	0.330484580385289	0.338842717688265
BB74	0.653494549941505	0.0268850365295168	0.799331818943689	0.768519553418547
BB75	0.861054098112253	0.0269419855385666	0.384965303182382	0.378513546023498
BB76	0.184822360237104	0.00474173854874094	0.65748876360597	0.627441754690113
BB77	0.833785955094013	0.0239034149938004	0.317308355627198	0.32086645609613
BB78	0.706601822531491	0.0213370319430335	0.417701880956548	0.406414884572762
BB79	0.577722622202312	0.0120636598613913	0.79176149913654	0.761447430560972
BB80	0.315800641712718	0.0163335668289655	0.830758628088102	0.802757534628592
BB81	0.679236498556872	0.029432549595527	0.523969097245357	0.521560364894299
BB82	0.591493835812198	0.00548784480693923	0.0934410780909775	0.0944994179367957
BB83	0.554964889260463	0.0221339825591557	0.629099717444719	0.607266085695452
BB84	0.605830764895707	0.0122912912819151	0.270316119162544	0.28452575690841
BB85	0.228878069487613	0.00675943541319026	0.837054124411731	0.807228416435382
BB86	0.648457322032748	0.0126573668822981	0.233457687542545	0.211903711481732
BB87	0.912914271570974	0.0325671369695151	0.461375595700209	0.444726033741415
BB89	0.646540693409229	0.0251893146407878	0.816315577781846	0.784967792886775
BB90	0.749368077741622	0.0153868876151473	0.204533921975702	0.214334309644669
BB91	0.846608012221272	0.0241788728407677	0.304220090302893	0.314692943377033
BB92	0.576883797832852	0.0218775830446708	0.725165163088358	0.696248191282294
BB93	0.489410664120804	0.0235586385256283	0.437057927554464	0.443888512207673
BB94	0.83451201326018	0.0320155199352899	0.562569233433832	0.549681844441593
BB97	0.192473671464316	0.00690072461372001	0.847925996155465	0.818275490178412
BB98	0.188291126521964	0.00801174871629713	0.314799165891216	0.333195771075661
BB99	0.681592400780663	0.0353994190889146	0.787592388336404	0.776080513934929
BCW01	0.469881740576117	0.018336832655197	0.838629122831209	0.807645236125475
BCW02	0.33270862721671	0.016863412020503	0.380228974810522	0.392600952741863
BCW03	0.423864972000222	0.0213778513298888	0.422219512392092	0.430261586299081
BCW04	0.788231937048617	0.0287727420406077	0.499773045494778	0.485212346314982
BCW05	0.424179476884498	0.0170984734102639	0.843312192105112	0.811923541702843
BCW06	0.734807334145031	0.0201905631502773	0.280591226301305	0.276825185725159
BCW07	0.324682642621116	0.0119219029524288	0.845488929940256	0.814237795795289
BCW08	0.604971079947755	0.0195761384686808	0.861067752851713	0.829559801806085
BCW09	0.193116482000366	0.00990016402538817	0.329754233463871	0.34728474132289
BCW10	0.494727868065563	0.0263871845440599	0.463059111129821	0.470043546276028
BCW11	0.703092638831204	0.0161963101254564	0.205331966438152	0.232062968822652
BCW12	0.576943297385684	0.0269542371463949	0.858423533909462	0.827049263721171
BCW13	0.241694092093969	0.00971217298853411	0.830487508426968	0.800051247731202
BCW14	0.522145184929389	0.0118495453480238	0.258759091098915	0.280154118422622
BCW15	0.539703459597366	0.0250054538693443	0.840231233667631	0.809321533571308
BCW16	0.483840443238101	0.0249148794708146	0.925287161856609	0.893862137313943
BCW17	0.61549324344487	0.0257142479432091	0.861369854439093	0.830111931635697
BCW18	0.630024889080764	0.0260392823877454	0.85174110288932	0.820540280116029
BCW19	0.527218529755653	0.0251894601047458	0.853417492103126	0.82241898554175
BCW20	0.673366414402167	0.0174396786550376	0.271499879498861	0.281680901252846
BCW21	0.157504425194213	0.00681996142139243	0.830887015573158	0.800211908434123
BCW22	0.0848186452973959	0.00358164686413474	0.287649381203575	0.308046327807083
BCW23	0.11074006156049	0.00466077339696055	0.843141218645242	0.81197060315011
BCW24	0.542599840602723	0.0186156082615579	0.841185592540742	0.809611692165538
BCW25	0.213956173888703	0.0081313593667614	0.84037527388982	0.809209198079103
BCW26	0.341321545474718	0.0176012333413193	0.382786539007486	0.39554234255614
BW01	0.873233767194981	0.0262210993102614	0.388388938802003	0.390166068986833
BW02	0.841552923783971	0.0164413078807194	0.276848531802554	0.288355020997052
BW03	0.901773420016014	0.0306278627801614	0.421429406919685	0.418061122989005
BW04	0.922013976326648	0.0432358815333452	0.584124721924805	0.591777227924435
BW05	0.915978621070831	0.0384512265849545	0.479474620558219	0.483578750399605
BW06	0.894099051979882	0.0363205377277108	0.464041709979532	0.468095671835265
BW07	0.887751654769638	0.0298564194212647	0.427735392081895	0.432741306487419
BW08	0.87164206687057	0.0286371890721903	0.430502923276591	0.434041843836774
BW09	0.921001416447652	0.0319391385877235	0.439730530226701	0.436646897984886
BW10	0.865234710035533	0.0261940311124715	0.395776810346828	0.402698098944437
BW11	0.83983364573799	0.024664247303472	0.37215665924798	0.380348376595993
BW12	0.9376409402766	0.039330935776804	0.544943874600166	0.549197112960549
BW13	0.862360254969894	0.0251540374314292	0.369454252854425	0.372293289367269
BW14	0.900158095575738	0.0292961001621943	0.439803777082962	0.446373677446251
BW15	0.77516184587681	0.0222148649972503	0.370864516127208	0.377277019861928
BW16	0.841865598524057	0.0218332989050271	0.340798026904045	0.346640671975427
BW17	0.879512398819897	0.0271891514875545	0.391190163661582	0.399578099318579
BW18	0.832441661741168	0.0234853003546903	0.320268429371311	0.33233683305946
BW19	0.917669599704489	0.0293541068662946	0.395161512436595	0.397941878689726
BW20	0.923104455491414	0.0456235827978374	0.592417203225601	0.599904806655191
BW21	0.888667829164604	0.0587334865992678	0.731180472130733	0.728751016848239
BW22	0.916663666241884	0.0403075057798748	0.5038983340378	0.510743544170037
BW23	0.914687926442608	0.0267762719828494	0.351934429116886	0.350770727922157
BW24	0.90709282595816	0.0283495190832334	0.368984892592358	0.361902661998605
BWd01	0.864885262236682	0.0261591298160067	0.391808230681065	0.399470214815708
BWd02	0.745005609076882	0.0222738121828295	0.367936816857316	0.376093049608669
BWd03	0.838040968655918	0.0308166092717795	0.480210097979254	0.487534701864843
BWd04	0.648829881904209	0.0147136350242173	0.303352084198949	0.316354661004521
BWd05	0.791315762249435	0.0223865160180982	0.329131910170881	0.328152367567883
BWd06	0.319923668636011	0.00993248405705048	0.301711561734694	0.319161440192743
BWd07	0.869236530655744	0.02103886561318	0.315752989482004	0.317164292619163
HW01	0.879899516698554	0.0429324202404448	0.56459274850408	0.57263438966455
HW02	0.896907398482858	0.0333089942799727	0.469598197248526	0.477598905425525
HW03	0.90978616928226	0.0406439168365703	0.532434220562758	0.535128537367823
HW04	0.934580515148425	0.029034618824998	0.38823239189352	0.384474620754034
HW05	0.919132912373596	0.032583815324695	0.441950378479881	0.440415266408345
HW06	0.911596465165514	0.0350239061125627	0.471353184925347	0.475489026443604
HW07	0.93670269344742	0.0455576963154632	0.617495593826006	0.612186933582788
HW08	0.855640420126227	0.0294949315869226	0.444386359443412	0.450399445570682
HW09	0.909618324535007	0.0389889109590871	0.535132770009257	0.546162639864238
HW10	0.922101843704892	0.0565295232067963	0.683826082673861	0.683821719364508
HW11	0.801427530329583	0.0179248922043328	0.335082894075188	0.348782555609022
HW12	0.934082358771974	0.0394312026304798	0.525686675064639	0.530347416511334
HW13	0.913089864015843	0.0317646563828113	0.413863528750748	0.410387131858935
HW14	0.887040950597257	0.0292048890486007	0.410611127263975	0.415936754618208
HW15	0.914811196386205	0.0341413560905765	0.467058562273715	0.47378144400193
HW16	0.841071403514104	0.0201579960189133	0.32241169172614	0.328636314805854
LW01	0.886833366239732	0.0250925455460452	0.3674889528348	0.370224589809384
LW02	0.464902308668965	0.00655550050400872	0.297861544041162	0.31766435490185
LW03	0.859206456439595	0.0228043907486531	0.302751263967902	0.305384793580453
LW04	0.837172363901452	0.0266615901020662	0.399934919609497	0.416386265758707
LW05	0.610032348467143	0.012020639060231	0.277274184112263	0.299211177366899
LW06	0.8939974738807	0.029699764940461	0.399096929039302	0.3961548930131
LW07	0.770518389482545	0.0217208595201836	0.292708255515236	0.316248322389263
LW08	0.868335525996642	0.0187537597231979	0.290298032038609	0.294542138330038
LW09	0.770281110931986	0.0253408553697434	0.393842638417412	0.396371617954935
LW10	0.884245784563631	0.028664303562188	0.410982394314507	0.41534057707141
LW11	0.853803974283249	0.0202885914428574	0.333976548170838	0.339363091140264
LW12	0.913642404826112	0.0293540242505531	0.401140274332649	0.394336600821355
OWW01	0.904513161933448	0.026564806976367	0.385900438227012	0.385661392922737
OWW02	0.857268284567527	0.0250880128373672	0.369097561572654	0.371667003818944
OWW03	0.826523721012844	0.0250093056004746	0.399899978598053	0.412564176866658
OWW04	0.799587827226602	0.0266683379130511	0.353535847744829	0.349420220284076
OWW05	0.894449491943678	0.0203505385967792	0.278432365180723	0.277600169518071
OWW06	0.856701247037132	0.0241002449532614	0.331441456635886	0.318997842959743
OWW07	0.814765513451456	0.0178540230008927	0.280586627960646	0.283421528725858
OWW08	0.90410490845224	0.0227121603994895	0.301458382898087	0.299699776692129
OWW09	0.859015591122269	0.0301159498936024	0.417245188930965	0.414883737197786
OWW10	0.667177903092011	0.0154547531810735	0.321860418469451	0.331951659511431
OWW11	0.814599437680426	0.0215196746157119	0.357061050484997	0.364447502751148
OWW12	0.75182539522074	0.0325810837989872	0.509807136029003	0.5088992945343
OWW13	0.810738916121263	0.0257030013088784	0.404277130501102	0.412182899836167
OWW14	0.541058831266443	0.00505443054542019	0.0964903742833279	0.106012420651265
OWW15	0.760356440745145	0.0152722989636638	0.259149348678161	0.268851733505746
OWW16	0.833587659517061	0.0288260385631261	0.419414384023773	0.425076698712346
PH01	0.775284245839482	0.0230970452972932	0.316169057770783	0.338955428529788
PH02	0.872898523290119	0.0291020732626497	0.427296043052379	0.424609418323655
PH03	0.655641129480659	0.0179819192936251	0.336522973337258	0.346463756856974
PH04	0.79934544855721	0.0340035085644742	0.573535052964813	0.565006520029222
PH05	0.780605256573578	0.0348516690307989	0.612849972437251	0.603158668895144
PH06	0.898598815684881	0.0290087642273335	0.394590435737402	0.389428845931576
PH07	0.956164515262101	0.0442827821928405	0.584293926384444	0.577346043360106
PH08	0.317838102211043	0.0112249045030229	0.833041940492557	0.804316104639177
PH09	0.542587485221232	0.00539127435556522	0.857976773233988	0.826929028706753
PH10	0.213795872435706	0.00539999552257474	0.876110245655344	0.845034568673619
PH11	0.931033805007389	0.0427480482349252	0.612497717818429	0.601142065943993
PH12	0.255379687448941	0.00673270049521464	0.854607659245306	0.824705399440545
PH13	0.891016187491348	0.0364734374652013	0.523035053748071	0.514366589970839
PH14	0.918406222825342	0.04163693473734	0.541631934659254	0.538438498366481
PH15	0.583947179005014	0.0150407013344626	0.875423850640115	0.84592879978663
PH16	0.950124105224938	0.0538418640278921	0.698649228468283	0.688163368820452
PH17	0.475832510400984	0.0234357979933915	0.833527949426551	0.80668844442411
PH18	0.253816483171022	0.0110865271417861	0.839266951064081	0.809693444282041
PH19	0.42688266497502	0.0157809437601463	0.813915391605567	0.78330415986375
PH20	0.147994824159235	0.00431815679473701	0.862972536343937	0.831594800445149
PH21	0.923761596742944	0.0452919433127261	0.604462934442271	0.596048616726142
PH22	0.220049076581061	0.00798520714784193	0.865549034918015	0.834990846643861
PH24	0.181509583807432	0.00823255504223777	0.859617031572667	0.829014812115788
SAC02	0.533289312775186	0.0117905853294164	0.827441298339584	0.798693754270072
SAC03	0.933160100897594	0.167913310260575	2.13801792457264	2.12953200581566
SAC04	0.92673615500093	0.0392233813255286	0.531045397113427	0.527438632830279
SAC05	0.938249554403297	0.0468847867748227	0.60524135934205	0.602326902331746
SAC06	0.158370579890159	0.00821186997731579	0.855590062229086	0.82598796241316
SAC07	0.295662888650111	0.0125914527524091	0.789554542793766	0.762742469529855
SAC08	0.829794313023178	0.0242986774342904	0.316794833787973	0.319288550464971
SAC09	0.859142200866752	0.0297324436315234	0.415411746219443	0.411258353610005
SAC10	0.467301288232853	0.0113297467429872	0.815292384098546	0.78661672194849
SAC11	0.929378364325395	0.0403897201123098	0.527018048828125	0.523096357421875
SAC12	0.177908542615047	0.00761496130055219	0.848751393757971	0.81862434020733
SAC13	0.350032264081057	0.0158870899624612	0.787897608705575	0.761768114895317
SAC14	0.815357888357967	0.0327226089556728	0.551269599304329	0.536524666020414
SAC15	0.494971587855586	0.00814883653503013	0.84292517033949	0.813029610005957
SAC16	0.635533453270966	0.0315148090294681	0.702520204585643	0.684105918484027
SNG01	0.858962328646319	0.027456898069416	0.362758760899827	0.364651418119048
SNG02	0.935666262993312	0.0460711220456069	0.685122285740961	0.668633947221012
SP10	0.823220335244118	0.0279606860156534	0.371747887429751	0.373758595194402
SP11	0.824131641549734	0.0331177747521117	0.40486893776824	0.410616500695974
SP12	0.462083231485993	0.0110237615091294	0.139155623191681	0.17094721801537
SP13	0.868687508422991	0.0203573134294736	0.280105246623223	0.297082439040284
SP14	0.670998590759348	0.0186180165811544	0.26734377588188	0.281953173675743
SP15	0.83669823639359	0.0208105584090791	0.261482181631172	0.28472512233785
SP16	0.407984846356746	0.0168920998771779	0.764003931805448	0.735712946038328
SP17	0.785139867804851	0.0184282975663379	0.259516690125508	0.268400823485586
WEL01	0.745515879903074	0.0410749318001577	0.944694833943915	0.914250569946508
WEL02	0.689391963394937	0.0317102710852792	0.785476410031538	0.758853506322272
WEL03	0.363659881435436	0.0159280710082394	0.791577074889228	0.764297702104712
WEL04	0.891812492995982	0.0353369445759107	0.469864414208962	0.477620858653405
WEL05	0.874762177945675	0.0355296036602017	0.505660917374495	0.499623586169527
WEL06	0.891618306337627	0.0322253213371227	0.438725959045679	0.433599654235686
WEL07	0.892502998918437	0.031176341518892	0.441488146508075	0.434449991281421
WEL08	0.179543972531859	0.00885493511004232	0.850985055327694	0.821141832009179
WEL09	0.943970645519246	0.0413537704232367	0.604094859398818	0.591395950246936
WEL10	0.907136833612321	0.047560071499084	0.723619084167845	0.709318507464521
WEL11	0.302992670221678	0.0140953238198265	0.820317149184013	0.792021973569065
WEL12	0.190868903519306	0.00432454796795202	0.864406389604942	0.833220809423897
WEL13	0.329713766424978	0.0149224729688728	0.827877823438154	0.800371542693479
WEL14	0.813121031338189	0.0354857797329204	0.480356146528088	0.460978038831855
WEL15	0.278760868648754	0.0134370480433217	0.821912619263864	0.793872500239007
WEL16	0.69835001822721	0.0283143357712842	0.5992595144512	0.578846176109646
WEL17	0.938478141636142	0.041354587365042	0.650493721835037	0.634190936328574
WEL18	0.233738076379481	0.011351746787564	0.831586060442917	0.803303097185992
WEL19	0.778873812120658	0.0265045812689473	0.41674504322004	0.392919245383981
WEL20	0.324052674998381	0.0136913687647649	0.830394702025405	0.802329120265478
WEL22	0.57541593281675	0.0261194755292419	0.705652106735095	0.686489862241957
WEL23	0.892306561604076	0.061266910520641	0.795344435667513	0.787581717774762
WEL24	0.959679757785467	0.0557157655262012	0.724856529294118	0.715643319294118
WEL25	0.517173114475804	0.0101675475787945	0.860799920454547	0.830721750347867
WEL26	0.69264517833127	0.0310643886713927	0.707608877521873	0.683436306254837
WF01	0.894929398909743	0.0290485410234139	0.401320941523342	0.40189247002457
WF02	0.778654623430635	0.0268581091220519	0.460692398544675	0.472286400930454
WF04	0.896866330427389	0.0267823977220601	0.374354368191193	0.372781161349023
WF05	0.893916038320653	0.0306320295559159	0.422704929788811	0.42342118198098
WF06	0.882810639634166	0.0422803409749981	0.565261551508079	0.565632039437312
WF07	0.870830554849297	0.0261579807139142	0.384020126682693	0.390183078245191
WGP01	0.723972639259584	0.0293106299821407	0.477411952855684	0.481259264308449
WGP02	0.838140254055384	0.0420142238607981	0.633311167562782	0.623180588715289
WGP03	0.194825323160734	0.00758176086048201	0.842747754074958	0.812622566924451
WGP04	0.706338938091955	0.0190415254185801	0.29385953012904	0.285706973955249
WGP05	0.376640318014008	0.0142479504952593	0.625213047717477	0.598954270595879
WGP06	0.86740393038413	0.0256835439936508	0.744568043705196	0.713686981071564
WGP07	0.487364823484511	0.0195320773595901	0.671241751917755	0.645419365757217
WGP08	0.64843642910133	0.0163086183546746	0.242004435329027	0.240816600744748
WGP09	0.426639174346348	0.015858884883631	0.864560414817774	0.836008145554099
WGP10	0.714453239158752	0.0121496979384229	0.853658886390402	0.822524538552124
WGP11	0.583562869050396	0.0158048861818694	0.847681794378109	0.816231345369367
WGP12	0.583231025526023	0.0249211447162909	0.822585839249873	0.794353960543673
WGP13	0.71281919226026	0.00852847712113839	0.135475188833883	0.133598373872386
WGP14	0.834605832296159	0.0212270026485244	0.294620344259422	0.296754437569383
WGP15	0.244011185270868	0.00827558132304655	0.304611965369143	0.322530245460476
WGP16	0.61100426838404	0.0148377785019473	0.348107792018727	0.362789784596939
WGP17	0.753177366569381	0.0125542698710083	0.213606827499428	0.222212201441317
WGP18	0.544395694653826	0.0102022259035273	0.329373644873289	0.345456000499085
WGP19	0.635756429772677	0.00885694849053131	0.126180694020844	0.131681033680744
WGP20	0.72620117188066	0.0231116485626894	0.345080126237195	0.353741611043583
WiW01	0.755096206061285	0.0378182863173833	0.563159615628423	0.560951249985593
WiW02	0.802022988639515	0.0142087528206942	0.268258516322217	0.274399270197275
WiW03	0.727267450819184	0.0123899995602637	0.238303280672569	0.246166940169924
WiW04	0.810543736880935	0.0148550727211971	0.262783856087863	0.286126295966672
WiW05	0.850149261535017	0.0164686495979081	0.273307630461165	0.294236846601941
WiW06	0.738029803510373	0.0109313192136384	0.162982594309613	0.169068231797831
WiW07	0.78682632774878	0.0282852862450479	0.453311635087931	0.447690843591906
WiW08	0.888611978014203	0.0859638743081528	1.04032593986327	1.04163203357735
WiW09	0.877026821993476	0.0564422657698249	0.751776890762768	0.745972579915971
WiW10	0.661085259858522	0.00988617671931809	0.26306899693781	0.286117662880685
WiW11	0.83800182121822	0.0254501411176704	0.361595655719728	0.380267960117741
WiW12	0.776286416375478	0.0153193467906987	0.239451897818079	0.248658726778123
WiW13	0.857651999694859	0.0614345805304738	0.712731175325047	0.715183850564178
WiW14	0.689787501660116	0.0131485626583404	0.303825296954315	0.317311524776407
WiW15	0.754473750131891	0.192081790258236	2.43089918950809	2.44053706409262
WiW16	0.79948772966185	0.0433077409497204	0.514748738783072	0.521268641579342
WiW17	0.826986789488305	0.0383646144842605	0.520406452453547	0.518480398205142
WiW18	0.88505801728689	0.0237742241205602	0.314683672057554	0.323460501237409
WiW19	0.904868599268682	0.0328280996930253	0.438885786901152	0.441892168708307
WiW20	0.777221469141917	0.0257474407341794	0.351131032486746	0.349902032733324
WiW21	0.556793227445063	0.0126144784683061	0.296166003426846	0.306790263460532
WiW22	0.752781501332785	0.0197495688369474	0.327583617595556	0.345093701467302
WiW23	0.720122923324074	0.0269185541060337	0.717268474397304	0.69205806329114
WiW24	0.835135516186605	0.0246721544128304	0.387921743447639	0.380815844244313
WiW25	0.910521450225682	0.0378497351608239	0.476186747384874	0.471446755079956
WiW26	0.49989385520266	0.0163820808934285	0.375637965651067	0.387564957078313
WiW27	0.668949365245842	0.0326916422001694	0.536023057476609	0.552678359098041
WiW28	0.704909371063733	0.0162242015638916	0.282794719599428	0.285920448974725
WiW29	0.817235438639147	0.0178315346779018	0.320124979328633	0.331423531669981
WiW30	0.371716271187289	0.0116177917866447	0.368314397029533	0.384351294599668
WiW31	0.75132707359385	0.0221543065709165	0.384123666945058	0.3909196415916
WiW32	0.418999977318718	0.0119736404645575	0.343715248699332	0.361094736607397
WiW33	0.82321213236706	0.0185336265218052	0.297161360007025	0.306209036937305
WiW34	0.84531451717374	0.024720910893779	0.361977462701435	0.360598253852914
WiW35	0.220355050656624	0.00682596562659486	0.295688651675338	0.314888118644067
WiW36	0.7764684155002	0.0215289035565801	0.331317789097989	0.338143617485693
WiW37	0.872873840206082	0.0282074451914058	0.394723105730331	0.391524891914739
WiW38	0.677920351652214	0.00935914677242397	0.271505965566798	0.286173933720395
WiW39	0.612717388445841	0.0170057733359824	0.345061948642201	0.355133212021361
WiW40	0.645363267970131	0.014217674632244	0.345285188881942	0.360676921787074
WiW41	0.781014764171982	0.0170437369387817	0.262734580546938	0.258582018441916
WiW42	0.810202497076165	0.0264947349310111	0.447251427858274	0.430418222939243
WiW43	0.787489392612081	0.0154353089985535	0.365700672583827	0.382072800191261
WiW44	0.796096797511642	0.0149310153101616	0.271503909196809	0.291082911876055
WiW45	0.860068351665362	0.0284811183335734	0.414045345982405	0.416437254017595
WiW46	0.486028174728731	0.0145325040849084	0.356819774184012	0.370920812973036
WiW47	0.890893610605989	0.0223001519422778	0.290649338423946	0.287010616982284
WiW48	0.853491705444077	0.0559527614707509	0.693164955028813	0.709877105507039
WiW49	0.593391902918977	0.0186056750633346	0.368866284607556	0.38007907978964
WiW50	0.697937786026584	0.0170048602823034	0.25912660085161	0.254819702811479
WiW51	0.830001292755341	0.0264647390790437	0.368032888824585	0.373346741651715
WiW52	0.783680894839747	0.0201229090425371	0.350572112497099	0.358893386110466
WiW53	0.525258659295742	0.0178699047829134	0.599312254656264	0.576471805547646
WiW54	0.861225525577405	0.0290253039221576	0.45582427688868	0.448329850553071
WiW55	0.88513296461717	0.0412720560307428	0.579980919352928	0.57134800432567
WiW56	0.790833390311188	0.0168875310433434	0.338250222993873	0.347674890458126
WiW57	0.864250396290935	0.0256350774137912	0.361208520871682	0.344584103378659
WP01	0.849035688911038	0.0350230701243133	0.655397935903365	0.629959442087621
WP02	0.435052889495296	0.0152313528123603	0.32574306492923	0.336314757020894
WP03	0.775939158891846	0.0215619686889537	0.34557657436681	0.348550016747957
WP04	0.764191506697829	0.0352642763569741	0.553650800946267	0.55101964041906
WP05	0.813810943658453	0.0311120335673168	0.513498283105024	0.512874536674181
WP06	0.850605013107228	0.0234904709012376	0.3163781830121	0.31056823305162
WP07	0.529083682024477	0.0172492638506269	0.325045603421112	0.333163505739365
WP08	0.776046512558089	0.0244204044105622	0.302864784873188	0.312666227128622
WP09	0.894912263233496	0.0341478442711686	0.435127523336531	0.440288016987414
WP10	0.76065845568948	0.023190130248851	0.339099782132202	0.353017062256139
WP11	0.680674395527188	0.0225210072583676	0.351319530826983	0.362931982880218
WP12	0.902003426767474	0.0355391990243116	0.47481603477855	0.470878047791328
WP13	0.1679295894339	0.00797481959343747	0.842187126451006	0.812531747687232
WP14	0.346305066096877	0.0110839489201452	0.799829437482119	0.771691759942777
WP15	0.920089844592112	0.0362561457838034	0.512240627183082	0.501594697992159
WP16	0.870227881039824	0.0318067461432417	0.422156256385012	0.420027085770544
WYC01	0.831204155188348	0.0348728199565166	0.488736258077545	0.487655550946226
WYC03	0.620209640692026	0.0219362310270016	0.411244908626792	0.417976762719731
WYC04	0.794102543780526	0.0168507053461375	0.298648814458384	0.314458010139198
WYC05	0.416760457785833	0.0104499491262929	0.325743012242845	0.343767141156082
WYC06	0.583966591105971	0.0208136552465823	0.785154792391428	0.754712110761981
WYC07	0.742735339509128	0.0235172718894562	0.424423430071305	0.432491565100219
WYC08	0.929340896039181	0.0338193222336251	0.450826010999827	0.449105459676952
WYC09	0.364307674504369	0.00650674169845078	0.286666174028797	0.304815276174952
WYC10	0.731505337758611	0.0310060890493207	0.565440035207053	0.561568638080209
WYC11	0.824248794588905	0.0208565085240918	0.307102434641801	0.303173776257747
WYC12	0.645010684165888	0.0288367182826769	0.50822626417783	0.508721561128527
WYC13	0.612723061409287	0.00941146891736622	0.318902571608661	0.337354972321183
WYC16	0.436304297848637	0.014713277789932	0.362288534562467	0.376364250027517
WYC17	0.749142705806198	0.0308113898971409	0.56736826287263	0.552407476626016
WYC18	0.500648157557908	0.0101361295871988	0.280737413365934	0.301370593751697
WYC19	0.765956523037415	0.0310898174118194	0.556951345628416	0.53658581306011
WYC20	0.608369884991997	0.0242234350784282	0.444658738071294	0.449180264610571
WYC21	0.450053565946073	0.0104875486327846	0.32326521282149	0.340395456799521
WYC22	0.429663727104956	0.0146063968714661	0.361907931651301	0.375993150720477
WYC23	0.608303116431895	0.0241968085783456	0.836796299670381	0.805321443225734
WYC24	0.625033646607129	0.0129314934585086	0.356491554387318	0.374046063580314
WYC25	0.774469197796325	0.129913248993056	1.69688568616579	1.68435098857777
WYC27	0.688709560401093	0.0276277403020861	0.430059689138373	0.429012809798899
WYC28	0.921396023958807	0.0328843130688322	0.44338022869447	0.434489439936536
WYC29	0.61606315813634	0.0260827352291792	0.795477133104413	0.76543393277849
WYC30	0.432538200642415	0.0211388430327142	0.411240517775355	0.420019789422028
WYC31	0.671922128349784	0.0309933514165492	0.743539218811235	0.720127486936643
WYC32	0.962012399718521	0.0479789965208879	0.63056412867456	0.623279839734334
WYC33	0.52730061017726	0.0143219026039309	0.674408117536312	0.645143219956968
WYC34	0.668339768044323	0.0245884918187219	0.74398589877214	0.716861915577436
WYC35	0.644301366166729	0.0248858287680546	0.733208359665481	0.703471783240098
WYC36	0.899013526202961	0.0362371416902965	0.496694383544021	0.492928657959503
WYC37	0.904397535473904	0.0346166614587717	0.484223607001321	0.477592148612945
WYC38	0.577743829682758	0.0246703800138784	0.811826150162612	0.780465984972525
WYC39	0.934785194281461	0.0458612575964375	0.578945356542194	0.58198482934431
WYC40	0.609026643407328	0.0175757764268473	0.394609230826766	0.407795195213163
WYC43	0.160261720572243	0.00657309012236373	0.821485709222541	0.79112149284132
WYD01	0.813589699756787	0.0271060680842699	0.426309140218756	0.428882985715139
WYD02	0.745335788204413	0.0176466386263153	0.336500206800048	0.348419897761104
WYD03	0.905100563231955	0.0266824584784	0.35854707672071	0.363977757356989
WYD04	0.874137358656543	0.0298148638993108	0.412756212330009	0.403079810214566
WYD05	0.737286542183101	0.0193001264474393	0.266143124379315	0.25326381966816
WYD07	0.807818068038693	0.0227966549754392	0.30303590337588	0.295347045687701
WYD08	0.745706811742106	0.0206444287151104	0.350816306064881	0.354401560531264
WYD10	0.86051433214091	0.033852465819233	0.461089119920249	0.455104903242831
WYD11	0.696487392366837	0.0175932286946741	0.238940480899131	0.226940615257989
WYD12	0.87962979072677	0.0325473713213665	0.474423812489089	0.461361246871908
WYM01	0.443889379051617	0.0125090324672845	0.296025955483725	0.311248870987864
WYM03	0.73614287801802	0.028809554781496	0.450598787249858	0.44651454654088
WYM04	0.728403729903433	0.0257895865225795	0.83481638918098	0.80902775896717
WYM05	0.736400859936433	0.0274282116326306	0.731489189116444	0.702529333762435
WYM06	0.932639274738775	0.0327779616036235	0.426369765316026	0.417741059262404
WYM07	0.930246179589028	0.031442200431206	0.391563254854806	0.390798620633679
WYM08	0.754927473095048	0.0219725603894958	0.319269303893527	0.335384410250423
WYM09	0.633939594908886	0.0220280032550574	0.348711250071319	0.350082106749586
WYM10	0.744760927586263	0.0205829165666556	0.328240822666359	0.337803584796672
WYM11	0.906199405146143	0.0375756253672662	0.512599987489817	0.502739829105085
WYM12	0.65823822524199	0.0163068738234057	0.23858037215506	0.21938699245133
WYM13	0.861054888409306	0.0372681817514741	0.524154196247345	0.515877439343875
WYM14	0.843943398308171	0.0214587683169944	0.287477179321676	0.304112995188358
WYM15	0.878384561457827	0.0235369580921027	0.347323956943459	0.347368170451857
WYM16	0.807812253202269	0.0411137370077812	0.875276850785485	0.846389079424162
WYM17	0.425220179996699	0.0117494380163726	0.293193442351887	0.31006729039852
WYM18	0.625301576204127	0.0120634655967362	0.300787661448707	0.311439471060535
WYM19	0.817921537887538	0.0250986484022229	0.410868309832676	0.420861015040421
WYM20	0.761761179796753	0.0259228683335629	0.760497342188741	0.730897991899854
WYM24	0.83734270138274	0.0269954481972742	0.405058333015154	0.408839853120152
WYM26	0.749566655533981	0.0235897329392562	0.360847154188074	0.35940833983721
WYM28	0.832801862201121	0.11588145014566	1.39074130510079	1.39078301386569
WYM30	0.83575782140571	0.035108462856102	0.562937125632684	0.553616555013257
WYM31	0.781593433053739	0.0262587074352998	0.36709114632839	0.358769793282115
WYM32	0.881040523936775	0.026868245701874	0.389661268823896	0.391991346733042
WYM34	0.83856395158277	0.0205682144864013	0.352939567841683	0.36414674025974
WYM35	0.82036179284466	0.0243759091417451	0.352169967382079	0.364606368255123
WYM36	0.869534668658784	0.0249419131684935	0.384002668668792	0.389284803015444
WYM37	0.908809704999111	0.0284863770262328	0.395526626963351	0.386555396347544
WYM38	0.714471015036663	0.0140754017592985	0.192341872027443	0.193513138205708
WYM40	0.906556279934198	0.0336553846251294	0.522565601406342	0.50820349000586
WYM41	0.907321687734948	0.031515623295322	0.418002795044769	0.42271590334846
WYM42	0.834744419834414	0.0271013004338935	0.418622286599303	0.426408685612895
WYM43	0.805588078675783	0.031525856749976	0.486079955634594	0.49051821022089
WYM44	0.762288608578984	0.0332391545523543	0.591845027227287	0.58361581093796
WYT01	0.73531821881189	0.0366896688386542	0.506853295128766	0.516651315415451
WYT02	0.88485829732983	0.026543822824404	0.358692166467138	0.367139985095175
WYT03	0.560842725768426	0.0174917738906192	0.232395889518414	0.255260926935788
WYT04	0.839686203010951	0.0310266637118294	0.423156748445893	0.421227221558331
WYT05	0.889129509897599	0.0291795418066669	0.397082956890375	0.391749604251253
WYT06	0.865305059088124	0.0191944829567174	0.326401854938461	0.345857030065519
WYT07	0.79509726676198	0.0147219832938938	0.288778693735084	0.304450251014319
WYT08	0.757023062753239	0.0129250463252551	0.286160127599301	0.300607397143029
WYT09	0.607479588037631	0.0155952067467309	0.752005325513039	0.724691271024986
WYT10	0.815960483515475	0.0231143321259834	0.358580729860759	0.367579041321382
WYT100	0.900308076979445	0.0499401948233615	0.618551058472977	0.628778294961057
WYT101	0.78048308920185	0.0973401264435399	1.14604067904364	1.1681922151812
WYT102	0.574652333408554	0.0218409617266861	0.376227145740168	0.387748143332186
WYT103	0.920984772532117	0.0289135832093503	0.404202424340872	0.411358729226539
WYT104	0.441468318413443	0.0106396076520602	0.31914651885471	0.335988244130666
WYT105	0.733655530652567	0.0167508101792995	0.241884706820297	0.226009947742085
WYT106	0.689938878372446	0.0145874657533253	0.244622330407997	0.264815993432523
WYT107	0.891311665504265	0.0226339101918211	0.331552061789639	0.347079779780219
WYT108	0.842630547853423	0.0274646662632245	0.407019537582167	0.404651022635038
WYT109	0.852465117368063	0.0281640606883501	0.399465099347015	0.400538282532649
WYT110	0.931738294047711	0.040363489086235	0.590356071252009	0.585536221542454
WYT111	0.895631524656351	0.0391593309345402	0.493552611980676	0.49219787426731
WYT112	0.841506068939663	0.0215468185776246	0.341154196967066	0.347907953811425
WYT113	0.532200903064459	0.0150020650410441	0.322587080840014	0.33504470001129
WYT114	0.854445928494242	0.0288949947525452	0.394499636885769	0.385638704298891
WYT115	0.441418835480177	0.0179512211337168	0.369362603529677	0.380504317221222
WYT13	0.828800340599208	0.0178295430030659	0.295742110265939	0.303495352398095
WYT14	0.870079994558402	0.0253949218664476	0.337474022172823	0.334243927325581
WYT15	0.913142903210579	0.0309093074197731	0.428521611272685	0.431641088006049
WYT16	0.766329134622498	0.0187016128361116	0.267596565271848	0.292097658867065
WYT17	0.812366450110414	0.0254752074408702	0.362276763446981	0.35652912334225
WYT19	0.543937382936066	0.0137182730337289	0.288672657910448	0.308524541611939
WYT20	0.771314245125122	0.0168656677723476	0.299749933033069	0.319760927699418
WYT21	0.839818130001755	0.0278969728616594	0.418669591479446	0.427197482492829
WYT22	0.819839912056858	0.0302803097008539	0.464488592736397	0.469630713219043
WYT23	0.867956878059811	0.0275963340824154	0.398614986947369	0.414916261834586
WYT24	0.789026723919416	0.0217880784344574	0.368677393251174	0.381759511795774
WYT25	0.839545914776655	0.0160736471502652	0.269683799961321	0.282482118553377
WYT26	0.86554559016735	0.0321990578597793	0.457190831271805	0.452391412876625
WYT27	0.856921272844728	0.0823912110119205	1.01468031207928	1.02735908595113
WYT28	0.739248580973968	0.0362862087012335	0.481794510076318	0.494902350405437
WYT29	0.843723466429787	0.0215708537322667	0.341562363831436	0.348525633247898
WYT30	0.75393896941896	0.0326540943756664	0.458312372086264	0.462378771493343
WYT31	0.778195830842132	0.0199201177506663	0.327895034970959	0.339581215755082
WYT32	0.602376309190898	0.0233938825492791	0.429474380699709	0.435781323090379
WYT33	0.808070493280029	0.024472572007137	0.306648999761919	0.31468848009047
WYT34	0.881870545599476	0.0277319360761682	0.394334243805234	0.391423989487668
WYT36	0.753136601245242	0.0200303583396314	0.315389998332184	0.330113266563146
WYT37	0.639983796962758	0.018313675853796	0.300407976165379	0.315441823085031
WYT38	0.888617959670092	0.055483386102992	0.660625939997677	0.656083978798791
WYT39	0.769929369931031	0.0211734335254139	0.314026277690564	0.324632866969009
WYT40	0.828999074074521	0.020080059605044	0.306727215601112	0.308137761118832
WYT41	0.905059736364746	0.0213861416239257	0.290045074452986	0.289936288054405
WYT42	0.816719980201159	0.0232699082214462	0.354455542959002	0.354851438383838
WYT43	0.817221993784538	0.0230892976563377	0.375551470236658	0.394402677312243
WYT44	0.852190227270582	0.0162543301570314	0.232791525031178	0.237900487974344
WYT45	0.862947649394723	0.0315673203371924	0.466150613469461	0.481880075586601
WYT46	0.860043016545851	0.024802250202947	0.360443517089903	0.361997516608496
WYT47	0.305878082694997	0.00334911238041278	0.299183260471726	0.320196234214265
WYT48	0.895608663098884	0.0976847497430131	1.17108346393443	1.17567816618093
WYT49	0.84027916350188	0.0262351531075129	0.393175106847871	0.403556368461132
WYT50	0.872929980444082	0.0326270051501086	0.421717524560587	0.426837279885927
WYT51	0.86382026203016	0.0214494108693445	0.33788373932374	0.341621112086112
WYT52	0.787034263624336	0.022007378800681	0.363866867248455	0.370438365543547
WYT53	0.874646019997615	0.0568319045582847	0.671528538289482	0.674770851021248
WYT54	0.891489589476345	0.0245993746415979	0.348705285915246	0.353933919230994
WYT55	0.857654632067741	0.0212014114750907	0.348497422991938	0.364069377067781
WYT56	0.844129016635159	0.0210662962835831	0.328235062638259	0.337521461054837
WYT57	0.875354632870829	0.0347936955190564	0.495773404731679	0.492659472129255
WYT58	0.841605224155517	0.0713088742681638	0.910659168651489	0.919176379626386
WYT59	0.822056099630319	0.0347465292900039	0.5254569106584	0.538565409093592
WYT60	0.845754447972426	0.0238135443046468	0.368332687393176	0.375126618966228
WYT61	0.855621350365827	0.0271259427839461	0.419444707684826	0.422935029061284
WYT62	0.605204245040898	0.00749158458658976	0.698792435038984	0.66768737279696
WYT64	0.334752244643635	0.0149855195178529	0.357908487416108	0.371589325894854
WYT65	0.870241688346532	0.0347191223207436	0.523315024841742	0.521462415020141
WYT66	0.503474694804469	0.0229386698600603	0.414466603249203	0.423386872410792
WYT67	0.711025657437378	0.0210478258189128	0.37335486514876	0.380230995012029
WYT69	0.333034460138596	0.0125652372055957	0.335878402604694	0.35082506219827
WYT71	0.861735739417339	0.0251831883396777	0.377907892153123	0.389373387256771
WYT72	0.848133141037197	0.0218386909060526	0.300194330310078	0.31849664116279
WYT73	0.840202906862232	0.0335597192893514	0.48912578234759	0.478414339884744
WYT74	0.762735699205389	0.0334412218678998	0.500569190945791	0.503795470415225
WYT75	0.690831849798338	0.0279588543083416	0.469839468258922	0.47712183094117
WYT76	0.770125403088661	0.0247784003325223	0.394432155003392	0.398349028731734
WYT77	0.904973511961314	0.0264056798408569	0.359361409414698	0.360687277039059
WYT78	0.814086397863195	0.0185516165631002	0.338781256537185	0.348133078970356
WYT79	0.788267091528296	0.0226526489459062	0.369610352937815	0.3749548074417
WYT80	0.556917748881569	0.0142994786197644	0.305984091725215	0.324305543269766
WYT81	0.913817637335354	0.0311677119319273	0.42277103413923	0.419133504434455
WYT82	0.914277284648002	0.0261931758519377	0.359705253772208	0.358070506388415
WYT83	0.927751305568223	0.0336698106767564	0.472478991697646	0.469411445105328
WYT84	0.857335627878493	0.0382667026698874	0.554852546081844	0.552990876815072
WYT85	0.590304040574833	0.0281549930388484	0.472030719597821	0.475250376565747
WYT86	0.846982719025975	0.0255535535436077	0.341801759637321	0.347414460485521
WYT88	0.225640934584591	0.00807792783597757	0.302504829089292	0.319570633826309
WYT89	0.310418230321839	0.0127981369280044	0.336995667610483	0.352566329946702
WYT90	0.640039487049138	0.0211021173720836	0.347644397514431	0.35487946183296
WYT91	0.833939522229309	0.0195562886094965	0.323112865172474	0.334461808556586
WYT92	0.879112819773822	0.0820343921431285	0.994313941450085	1.00538752264666
WYT93	0.654888583489932	0.0224713201951696	0.416700059399878	0.425472970773256
WYT96	0.830030789277094	0.0340035902740148	0.547576786255164	0.538430360830657
WYT97	0.774684561170219	0.0173997732125556	0.22077915589517	0.251112673786287
WYT99	0.851498779272852	0.0317591345260099	0.445192213021267	0.446659951645479
