# Supplementary material for: Relationships between community composition, productivity and invasion resistance in semi-natural bacterial microcosms
Source: eLife. 2021 Oct 18;10:e71811. doi: 10.7554/eLife.71811 (PMC8523168; doi:10.7554/eLife.71811)
Supplement: Figure 3—source data 3. [file elife-71811-fig3-data3.csv]

Community	C1	C2	C3	C5	C8	C13	C14	C16	C17	C18	C20	C22	C23	C24	C27	C28	C35	C39	C45	Total
AE01	0.447939867307014	3.80506287304932	0	0.519860385419959	0	0.231049060186648	0.462098120373297	3.40946438426196	0.366204096222703	4.37285496611205	2.06626311470583	0.597253156409352	3.06388903557019	0.998577424517997	2.59440800544535	0.447939867307014	0	2.8913989800753	2.38478657782748	278.681179300388
AE02	0.346573590279973	4.77649605296926	0.231049060186648	0	0.173286795139986	1.49993655677676	0.366204096222703	2.07419208935712	0.366204096222703	3.12362946193663	1.9149749527414	0.366204096222703	1.86116543626057	0.462098120373297	3.61863911034205	0.722592939474041	0	3.7246500327103	3.21938580162857	299.159523646906
AE03	0.621226662447	3.41070016125008	1.4391627045121	1.06916652975401	0.173286795139986	0.462098120373297	0.462098120373297	1.88765349337865	0.231049060186648	3.21144411384813	1.62960366183804	0.462098120373297	3.21594026983879	0.5364793041447	1.38104490879718	0	0	4.03491245037399	2.45240651727209	272.502903235371
AE04	0.621226662447	4.20521847031336	0	0.402359478108525	0.274653072167027	0	0.693147180559945	1.88765349337865	0	4.84957174807401	1.68273244924563	1.93804351060836	0.767528364331349	1.09861228866811	0.998577424517997	0.549306144334055	0	1.41616508068312	2.80587167602649	276.025105401396
AE06	1.00633792268379	3.72920149336075	0	0.346573590279973	1.75969588534714	0.462098120373297	0.693147180559945	2.25997396915742	2.72490096082315	4.34769187771178	1.96550654776932	0.597253156409352	2.60667932981958	0.828302216596	1.09861228866811	0.346573590279973	0	1.56071040904141	2.99600653199851	299.522815635351
AE07	0.346573590279973	4.03239003852848	3.54839559122608	1.90221765729781	1.55564406701784	1.46067554489129	0.597253156409352	4.55992748955101	0.828302216596	2.21166874457859	2.20561651562805	0.462098120373297	1.56071040904141	1.05935127678265	5.05934146347292	0.693147180559945	1.13373246055405	3.37760398764181	2.49981469584348	348.365197455877
AE08	0.621226662447	4.73026341016877	2.86840135624632	0.173286795139986	0.447939867307014	0.366204096222703	0.597253156409352	2.6445989582718	0.231049060186648	3.57943085168172	1.86207360993157	3.2350122046041	3.94788900896082	0.366204096222703	1.84314302917047	0.447939867307014	0	1.79787584878412	2.30699628151475	318.814822375729
AE09	0.346573590279973	4.40168003268454	0	0.895879734614027	0	0.828302216596	0	1.64721414086977	0.597253156409352	2.97419010577483	2.03609222795925	0.231049060186648	0.902683400367403	1.05935127678265	2.31114100857691	0.748933068388498	0.231049060186648	2.36000883330753	2.10089174599773	260.965686207191
AE10	0.519860385419959	2.00488952717197	2.46585384517468	0	0.173286795139986	0.366204096222703	0	1.69586544507746	0.366204096222703	3.99297235450507	1.63972434103468	0.597253156409352	0.963457252632055	1.87826320105642	0.828302216596	0.621226662447	0	2.3549196759306	2.09805769198376	252.775427465286
AE102	0	4.87107078230222	0	0	0.173286795139986	0.231049060186648	0	2.80349948424842	0.828302216596	2.4109973868598	1.60484837187412	1.9185807378623	2.11168475049935	1.3647815207407	0.998577424517997	0.447939867307014	0	0.828302216596	2.87889181716164	254.784199160223
AE104	0	3.63652709725452	0.231049060186648	0.794513457586986	0	1.1945063128187	1.86860068876533	2.01022842008709	0.231049060186648	2.7395124951302	1.9826246168954	0	3.57295078860677	0.366204096222703	1.38104490879718	0.850299345415539	0	0.828302216596	0	305.361219163952
AE105	0.274653072167027	1.13501922512427	0	0	0	0.231049060186648	5.45642857198363	0	0.828302216596	0.792857451407653	1.33848820227953	0	0.366204096222703	0	0.231049060186648	1.12495241758257	0.231049060186648	0.366204096222703	0.0990210257942779	206.520334076443
AE106	0	3.38627702450627	0	2.88837285667922	0	0.597253156409352	0.597253156409352	0	0.5364793041447	0.582059693343189	1.87931085929479	0	0.231049060186648	1.62506577440038	0	0.346573590279973	1.51795896386685	0.231049060186648	0.198042051588556	207.607912920661
AE108	0.173286795139986	3.69083347682346	0.231049060186648	0.173286795139986	0	0.828302216596	3.6866847448216	0	0.5364793041447	0.587437903437986	1.19561026648817	0	0.366204096222703	0	0.231049060186648	1.25265882352406	0.231049060186648	0.231049060186648	1.42279100262674	218.683398350464
AE109	0	3.96712170473708	1.13373246055405	1.38235727187786	0.173286795139986	0.963457252632055	0.5364793041447	1.17545350820539	0.366204096222703	3.49457869155447	2.73151551629023	0	3.3914259191059	0	0.924196240746594	1.44977316361513	3.58505858707487	1.76275567689818	1.6694436234067	367.582019413381
AE11	0.447939867307014	1.8494980901679	0.231049060186648	2.17982934387659	0.173286795139986	0.963457252632055	0	1.59583058092735	1.01484081257447	3.19769810533691	2.33960000890213	0	1.67898420080454	1.5350567286627	1.34178389691172	1.59671982984066	0	6.74321840207375	3.13481355265052	305.66785188629
AE111	0	3.05212631479292	0.231049060186648	1.84599736449463	0.274653072167027	0.732408192445407	0.924196240746594	0	0.462098120373297	3.64392135749228	1.44682495316436	0	0	0	1.77917935990044	1.42594561866405	0.924196240746594	3.21108413122936	1.30680193458113	282.142882898845
AE112	0.346573590279973	1.42383470356232	0	0.621226662447	0	1.09861228866811	0.5364793041447	0.231049060186648	0.732408192445407	0.495886879382311	1.89923798760497	0	0.231049060186648	0	0.231049060186648	0.599473818199593	0.462098120373297	0.767528364331349	0	230.286652135017
AE113	0	1.58947300281046	1.26888749659011	1.34381960192104	0	0.597253156409352	0.462098120373297	0	0	0.76749502432957	2.75631121747278	0	0.231049060186648	0	0.231049060186648	2.36817615911092	0.5364793041447	2.74582642953788	0.198042051588556	256.864531288052
AE114	0	3.42994935615687	0.366204096222703	0.173286795139986	0	0.366204096222703	0.597253156409352	0.366204096222703	0.462098120373297	0.730129178260804	2.24139141732286	0	1.59583058092735	0	1.4522362755632	0.997246011641069	0.963457252632055	5.84827915748977	0.0990210257942779	275.071115896171
AE115	0.173286795139986	3.81627221771595	0	0.693147180559945	0	1.26888749659011	0.366204096222703	0.231049060186648	0.462098120373297	0.940956705857633	2.31129386188083	0	0	0	0	1.00633792268379	0	2.34036132142971	0.0990210257942779	263.335260691101
AE117	0	1.47032774473244	0	0.866433975699932	0	0.828302216596	1.24588987276112	0	0	2.40677258032502	1.18601200751892	0	0.462098120373297	0	0	2.01139707020088	0	1.15524530093324	0.255965638461151	212.886605450283
AE118	0.173286795139986	1.62394872392224	0.231049060186648	0.693147180559945	0	1.67021176469875	0.231049060186648	0.462098120373297	1.08603217934049	2.70035519788089	2.55773892407219	0.462098120373297	0.366204096222703	0.828302216596	0.597253156409352	1.71673332111547	0.462098120373297	2.47551635746577	0.198042051588556	353.073164098652
AE119	0	1.73807414869084	0	1.4542777899908	0	0.462098120373297	0.693147180559945	0.231049060186648	0.597253156409352	2.71948668326666	2.4023854470536	0	0	0	0	1.242453324894	0	0.693147180559945	0.255965638461151	238.465636822424
AE120	0.173286795139986	2.4388829156695	0	0.173286795139986	0	0.597253156409352	0.231049060186648	0	0.366204096222703	3.77104322072777	1.54462352451477	0	0.597253156409352	0	0.231049060186648	0.486477537263828	1.04516473864305	0.231049060186648	0.0990210257942779	203.424797504284
AE122	0	1.78077641229096	0	1.59671982984066	0	0.231049060186648	0.597253156409352	0	0.231049060186648	1.04953602381128	2.67379140951119	0	0.597253156409352	0	0.231049060186648	1.43575079695237	0	2.34975161375195	0.156944612666873	226.156266892459
AE123	0	1.92399819822464	0.231049060186648	1.0151107526366	0	0.597253156409352	0.924196240746594	0	0.231049060186648	2.46858169965719	2.38616048237626	0	2.20131460820016	0	0.231049060186648	0.447939867307014	0.828302216596	2.02048563964267	0	238.633710201341
AE124	0	2.02866811751898	0	0.87412689036662	0	0.231049060186648	0.462098120373297	0.366204096222703	0	3.3667925577879	1.87443514826055	0	3.82545506988614	0	0	0.274653072167027	1.75249845734259	0	0.2299197017763	213.324042371293
AE125	0.274653072167027	1.93623776782227	0.767528364331349	0.346573590279973	0	0.231049060186648	0.231049060186648	0	0	0.484759263330267	1.33566423288632	0	5.22623614641305	0	0	0.575646273248511	0	0.693147180559945	0.0990210257942779	175.36274827914
AE127	0	2.78964459051119	0	2.71549383327752	0	0.231049060186648	0.462098120373297	0	0	4.00115813860637	3.31732987777674	0	0	0	0	0.722592939474041	0.231049060186648	0	0.198042051588556	300.460261828301
AE128	0.173286795139986	2.06803386793987	0	1.29823921272255	0	0.693147180559945	0.462098120373297	0	0.231049060186648	2.59148783003897	2.56734892044324	0	1.91003326099119	0	1.7309856169634	1.93298268048712	0	0.767528364331349	0.427961753364856	258.694774845286
AE129	0	2.66421469144671	0.231049060186648	0.794513457586986	0	0	1.61209396898383	0	0	3.40329237340734	2.16135497729308	0	0	0	0	1.3701597308355	0	1.7309856169634	0.0990210257942779	252.168546972436
AE13	0.346573590279973	3.69463372247744	0	0.447939867307014	1.04741368550661	2.66543907726558	0	3.33585908702017	0.597253156409352	4.24124186459581	1.62291002836577	3.76703090160063	4.43087078432134	1.61734342130654	3.61514867705295	1.22070048064659	0.231049060186648	5.60994248748533	1.92829376102555	366.990739654094
AE130	0	1.95317443586313	0	0.761130609430856	0	0.828302216596	1.6424178950524	0	0.648636716351771	2.8340918305637	2.74008277814594	0	2.96970004497518	0.5364793041447	1.12243194332882	0	1.13373246055405	0.693147180559945	0	262.088676241946
AE131	0	1.87273127686842	0	0.978005751357037	0	0.366204096222703	1.63755162857868	0	0	2.23704155441686	1.62187103586901	0	0.231049060186648	0	0	0.967800252726973	0	0	1.73339428341694	190.143540123772
AE133	0	2.06548980538495	1.05935127678265	1.79175946922805	0	0.231049060186648	0.231049060186648	1.11073483672507	0.231049060186648	2.37308476511235	1.36818318760632	0	0	0	0	0.274653072167027	0.231049060186648	0.231049060186648	0.728552346832028	156.974239076391
AE134	0	1.39238894557602	0	1.77000662498065	0	0.462098120373297	0.231049060186648	0.462098120373297	0.231049060186648	2.45793682290939	1.00805730559937	0	0.5364793041447	1.03034748445277	0	2.2032108583793	0.231049060186648	0.231049060186648	0.787632678023569	205.546955834197
AE135	0	2.2455986414569	1.22962648470465	2.60699484176648	0	0.366204096222703	0	1.14466240149505	0.597253156409352	2.29949464620208	2.81663640508369	0	0	0	0	0.621226662447	3.29251805683654	3.41298642960792	0.313889225333746	258.776014475321
AE136	0.173286795139986	1.25350541176161	0.366204096222703	0.621226662447	0	0.231049060186648	1.656604433192	0	0.693147180559945	2.42454032862879	2.0156578974905	0	0.231049060186648	0	0	1.31437384300695	0	0.597253156409352	1.97737048903109	260.48875167587
AE137	0.173286795139986	1.43884894204869	0	0.677012550275553	0	0	0.462098120373297	0	0.597253156409352	2.53503914243444	1.55315065903243	0	4.29395672925167	0	0	1.29262099875954	0.828302216596	0.462098120373297	0.198042051588556	208.904773490467
AE139	0.519860385419959	1.17296945209348	0.366204096222703	0.722592939474041	0	0.732408192445407	0.462098120373297	0.231049060186648	0.462098120373297	3.51252630348848	1.82514588707723	0	0.462098120373297	0	0	1.86883480914168	0.462098120373297	1.42555537300535	0.476029215739315	225.408681132388
AE14	0.346573590279973	4.05503579917374	0.693147180559945	0	0	0.366204096222703	0	1.52832249289019	0.998577424517997	3.58739357144184	2.29534430266005	0.366204096222703	3.44068876659656	1.70798799313442	2.566614135799	0.173286795139986	0	1.3647815207407	1.98749186535139	275.478370549764
AE143	0.173286795139986	2.25550452647898	0	1.24071115756498	0	0.462098120373297	0.693147180559945	0.231049060186648	0	1.17252823379541	1.34562028395249	0.597253156409352	0.963457252632055	0	0	0.519860385419959	0	0.231049060186648	2.0591861574347	251.608432387682
AE144	0	1.73025054410929	0	0.346573590279973	0	0.366204096222703	0.597253156409352	0	0.366204096222703	4.43774362492636	1.5552876193292	0	4.62410380262862	0	0.231049060186648	1.17053280678105	0	0.693147180559945	0.328940727570578	261.088088726987
AE145	0	2.74131771302211	0.231049060186648	0.621226662447	0	0.828302216596	0.597253156409352	0	0.732408192445407	3.63517468416557	1.99951990008244	0	2.484906649788	0	0	0.80471895621705	0	0.462098120373297	1.11829114744655	261.818964192985
AE146	0.447939867307014	1.66443633086261	0	0.173286795139986	0	0.597253156409352	0	0.231049060186648	0.693147180559945	2.69314689986888	2.55131743455366	0	0.462098120373297	0.5364793041447	0.231049060186648	1.81177014614644	0	1.87826320105642	0.342556467542624	244.200708976213
AE147	0.346573590279973	0.987391337686675	1.47693893294777	0.447939867307014	0	0.828302216596	0.828302216596	0.231049060186648	1.05935127678265	2.51881181315997	1.4672139533946	0	0	0	0.231049060186648	1.59923241380404	3.44095185527109	0.767528364331349	1.69990429576281	249.346308619562
AE149	0.693147180559945	1.04282610819156	1.11073483672507	0.447939867307014	0	0.231049060186648	1.46067554489129	0	0.366204096222703	0.793201094506308	1.46457678599884	0	0.366204096222703	0	0	1.20907047673787	2.09718971318611	1.15524530093324	1.9035579678121	226.454666461892
AE15	0.173286795139986	2.30640390093612	0.231049060186648	0.575646273248511	0.173286795139986	0.231049060186648	0.231049060186648	2.07419208935712	0.231049060186648	4.24784002775744	1.53225110935689	0	3.85741994767178	1.52144939715595	1.61209396898383	0.447939867307014	0	2.08460960385849	2.28685770870351	246.316854034248
AE150	1.02358614055553	1.66103282290612	0	0.599473818199593	0	0.924196240746594	0.597253156409352	0	0.597253156409352	0.908504873918668	3.64402376983648	0.231049060186648	0.693147180559945	0	0.998577424517997	2.97823393059886	0.902683400367403	1.1945063128187	0.612922777306913	350.773805778462
AE151	0.519860385419959	2.6303932813056	1.13373246055405	2.35764994202763	0	0.462098120373297	0.828302216596	0.5364793041447	0.462098120373297	0.622518677991664	3.78916554883564	0	0.693147180559945	0	0	4.04081206370976	0	1.08603217934049	0.564463388368775	344.836811966285
AE152	0.173286795139986	1.34096097749784	0.828302216596	0	0	0.693147180559945	0.231049060186648	0.998577424517997	0.462098120373297	1.35612484320008	2.00245777773094	0	0.366204096222703	0	0.924196240746594	1.41574012003399	0	1.46067554489129	2.59147074100989	170.960112260082
AE153	0.346573590279973	1.84081282478354	0.597253156409352	0.978005751357037	0	1.39655158067548	2.3633589452587	0.963457252632055	0.366204096222703	2.68980866293436	2.65032174423258	0	1.47693893294777	0	0.231049060186648	1.47152600786254	0	1.24588987276112	3.72178190044954	237.098669307268
AE154	0.173286795139986	2.04994086063007	0.231049060186648	0.173286795139986	0	0.231049060186648	0.231049060186648	1.1945063128187	0.87968577653842	2.89462027039249	0.801098489815601	0	0.828302216596	0	0	0.346573590279973	0	1.67021176469875	2.38664744352885	147.116072504407
AE156	0.549306144334055	4.10463416951074	0	1.17053280678105	0	0.767528364331349	1.63509159281281	0.231049060186648	0.767528364331349	1.61789235133586	2.50366946344688	0	0.462098120373297	0	0	0.909396539931596	0.231049060186648	1.3647815207407	2.20362691051811	219.287673049579
AE157	0.447939867307014	1.46247988000645	0.462098120373297	0.814524134505371	0	0	3.48576215171666	0.693147180559945	0.597253156409352	2.70925790235651	2.08416170573916	0	0.693147180559945	0	0.902683400367403	1.29823921272255	0.366204096222703	1.64721414086977	0.951327702811948	210.354359282917
AE158	1.19687293569551	2.57414614516685	0	0.346573590279973	0.173286795139986	0.231049060186648	0.693147180559945	0.693147180559945	0.87968577653842	3.96171861921682	1.17711783900967	0	3.29432622530153	0	0	0.447939867307014	0	1.3647815207407	0.598522106003775	218.424946252619
AE159	0.173286795139986	2.54144067874941	0	0.173286795139986	0	0.924196240746594	0.648636716351771	0.366204096222703	1.16550252048883	3.90324296334919	4.21270854149648	0	2.63832766861613	0.854983119153846	0	3.16981779141811	0	0.828302216596	1.04588407953421	357.434459423422
AE16	0.519860385419959	3.78521200796121	1.83646277887599	1.40869740079231	1.65568408098746	0.767528364331349	0.462098120373297	2.67144524576647	1.24588987276112	4.32452528662521	3.13919156547329	0.231049060186648	1.56071040904141	1.99715484903599	1.05935127678265	0.850299345415539	2.49177974552225	4.40465252352178	1.84633730264235	429.910429139076
AE160	0.621226662447	2.23657035321292	1.17545350820539	1.83161640346008	0	0.462098120373297	0.366204096222703	1.61734342130654	0.767528364331349	1.90164618435072	3.98634692920763	0	0.462098120373297	0	0	1.61419241389304	0	3.4333712373257	2.15326857757271	348.032902843353
AE161	0.173286795139986	2.0564787198854	0	0	0	1.05935127678265	0	0.366204096222703	0.366204096222703	2.26251136938684	1.72392517877376	0	2.45590285745812	0	0	0.833051127543801	0	0.462098120373297	3.27965650826607	195.140482640604
AE162	0	1.47668329657774	0	0.346573590279973	0	0	0.366204096222703	0.462098120373297	0.462098120373297	3.74762722713691	0.92236812503755	0	4.04640024583164	0	1.26139654463942	0.447939867307014	0	1.18511602049647	3.0836198068851	186.267860489159
AE163	0.748933068388498	1.54419601707045	0.462098120373297	0.621226662447	0	0	0.462098120373297	0.693147180559945	0.597253156409352	2.3862162633762	2.00422840446006	0	1.13373246055405	0	1.1945063128187	0.173286795139986	0	1.656604433192	2.78692334332824	205.309423053946
AE164	0.346573590279973	1.37375503569024	0	0	0	0.231049060186648	0.231049060186648	1.05935127678265	0.231049060186648	3.98798944473431	1.42508451380091	0.231049060186648	0.462098120373297	0	0	0.922219863528484	0	0.828302216596	1.03345388282141	162.8100457096
AE165	0	2.99572831538398	0	1.91573446261538	0	0.767528364331349	0	0.963457252632055	0.462098120373297	3.12943717788798	4.72622256269758	0.231049060186648	0.462098120373297	1.29727343270354	1.25373337189785	1.24418343560514	0.5364793041447	4.00738326912308	1.06495999276629	331.591181915054
AE166	0.519860385419959	2.40407884025715	0.231049060186648	0.486477537263828	0	0.231049060186648	0	0.597253156409352	0	2.78126424987602	2.010165952399	0	3.73842462049365	0.732408192445407	0	0.575646273248511	0	0.693147180559945	0.840872004492879	195.702701844828
AE167	0	1.48888100673911	1.13373246055405	0	0	0	0.231049060186648	1.05935127678265	0.366204096222703	3.33308121920222	1.11814040762908	0	0.924196240746594	0	1.11073483672507	0.519860385419959	0	2.51653638838484	1.1834284720355	184.166236099191
AE168	5.05712727031985	2.34523563959503	0.231049060186648	0.575646273248511	0	0.231049060186648	0.231049060186648	0.902683400367403	0.366204096222703	2.89059687984053	2.08469564238653	0	1.15524530093324	0	1.05935127678265	0.447939867307014	0.231049060186648	2.00129568903551	0.328940727570578	227.884036817421
AE169	0.794513457586986	1.47685880533023	0.5364793041447	0.346573590279973	0	0	0	1.22962648470465	0.998577424517997	2.94168275955799	1.82659674693892	0	4.48611659391414	0.231049060186648	0.963457252632055	0.895879734614027	0	1.62760064086212	0.932565416803221	200.599232874431
AE17	0.447939867307014	3.20223575833829	0.597253156409352	0.173286795139986	0.519860385419959	0	0	1.22962648470465	1.22962648470465	2.18650348368613	2.34080090863544	0.828302216596	4.19907865630916	0	0.231049060186648	0.922219863528484	0.462098120373297	4.56047452748691	2.3050417904724	288.896369021654
AE170	0.346573590279973	1.61200548414727	0	0	0	0.462098120373297	0.597253156409352	0.828302216596	0.693147180559945	1.74819236227379	2.53072537065592	0.366204096222703	5.61379429085826	0	0.732408192445407	0.967800252726973	0	2.61067139350182	0.818585683281939	218.446443887263
AE171	0	1.15204106791383	0	0.621226662447	0	0	0.231049060186648	0.828302216596	0.462098120373297	3.75638836578854	1.23243006638821	0	0.597253156409352	0	0	0.621226662447	0	1.41616508068312	2.36780442693956	164.237922349822
AE173	0.173286795139986	3.52370081393647	0	4.57718359729653	0	0.231049060186648	0	0.462098120373297	0.231049060186648	0.968496602166196	1.7586344215435	0	0.5364793041447	0	0.231049060186648	0.173286795139986	0	1.46067554489129	0.553028715843984	179.896033650193
AE174	0.173286795139986	2.77556633769938	0	0.402359478108525	0.173286795139986	0	0	0.828302216596	0.828302216596	3.04652344474701	1.8254177808784	0.462098120373297	0.693147180559945	0	0	0.850299345415539	0	1.46067554489129	0.523365949447092	184.04118293743
AE175	0.173286795139986	1.15226870298015	0.5364793041447	0.693147180559945	0	0.231049060186648	0	1.0729586082894	0.462098120373297	4.1078868292892	1.24343662389969	0	0.693147180559945	0	0.231049060186648	0.519860385419959	0	5.34106819443807	0.553028715843984	202.474365965172
AE176	0	1.66177844049705	0	0.693147180559945	0	0.963457252632055	0	0.231049060186648	0.648636716351771	2.75110974846342	1.56145269174655	0	0	1.08603217934049	0	0.967800252726973	0	2.4731268609729	0.354986664255429	223.278711542095
AE177	0.274653072167027	2.00594287634619	0	0.519860385419959	0	0	0	0.597253156409352	0.462098120373297	2.89593897253379	1.98008704779344	0	5.00596069364108	0	0.597253156409352	0.621226662447	0	3.79894699531648	0.644408500930979	206.407631470625
AE178	0.173286795139986	4.11970615256622	0	0.967800252726973	0.346573590279973	0.597253156409352	0.231049060186648	0.963457252632055	3.18036064462947	3.32874396014325	2.12333224069375	0	4.15541920465976	0.5364793041447	1.47693893294777	0.519860385419959	0	2.58022146730575	1.69075696817313	297.295633646162
AE18	0.173286795139986	1.13149234845299	0.462098120373297	0.447939867307014	0	0	0.5364793041447	1.7419155579044	0.366204096222703	0.964140316565736	1.15611927601287	0	5.06738495261615	0	1.26139654463942	0	0	5.43620368212691	2.35902465548221	188.765583656449
AE19	0	3.77772083831852	0.231049060186648	0.549306144334055	0.346573590279973	0.231049060186648	0.231049060186648	0.767528364331349	0.597253156409352	2.0020514650019	1.48358166462149	0.693147180559945	0.924196240746594	0	2.08074108848506	0	0	0.693147180559945	2.14043595943875	256.432058380598
AE20	0.447939867307014	1.57139405246458	0	0.274653072167027	0	0	0	0.366204096222703	0	2.1818754388065	1.48472848578825	0	0.998577424517997	0	0.597253156409352	1.15129254649702	0.963457252632055	5.88980986402187	2.33998453629324	177.602401224907
AE21	2.16854923505648	1.34254744366675	1.99380473708483	0.346573590279973	0.173286795139986	0.231049060186648	1.52144939715595	1.77757293108846	0.231049060186648	2.71750914420558	1.77433689399975	1.22962648470465	3.97126891668736	0.5364793041447	1.03034748445277	0.967800252726973	1.15524530093324	6.30301587725554	1.90164687609718	304.58748119231
AE24	0.274653072167027	2.52918172159516	0.231049060186648	0.761130609430856	0	3.11114752303672	0.366204096222703	0.902683400367403	0.462098120373297	4.2550558285067	1.744363849671	0.366204096222703	1.70798799313442	0	1.1945063128187	0.346573590279973	0	4.50472974186201	2.0870130194065	229.253984687686
AE25	0.677012550275553	3.52828253318302	0.231049060186648	1.37326536083514	1.13044714426226	0.693147180559945	1.09861228866811	1.13373246055405	0.902683400367403	4.2888146174822	1.40031136516327	0.963457252632055	3.39578327962835	0	2.46646602777712	0.173286795139986	0.963457252632055	1.95264438482782	2.65698926178471	280.646808028286
AE28	1.17962471782377	4.49561833345291	0.693147180559945	0.173286795139986	0.173286795139986	0	0.732408192445407	0.693147180559945	0.462098120373297	2.24496492309498	1.59989093241372	0.693147180559945	2.31373001835612	0.231049060186648	4.14572812216452	0.794513457586986	0.693147180559945	2.29923498104288	2.55027973926795	277.410413723434
AE29	0.621226662447	3.94832764742844	0.693147180559945	0.173286795139986	0	0.828302216596	1.09861228866811	1.52144939715595	0.597253156409352	3.25580037146469	1.59579787385403	0.231049060186648	0.924196240746594	0	3.01999416346254	0.519860385419959	0.693147180559945	0.828302216596	2.9317954404772	250.406347828522
AE30	0.748933068388498	3.48863042434686	0.231049060186648	0.866433975699932	0	0.366204096222703	1.42555537300535	1.15524530093324	0.693147180559945	4.34900878936108	1.07399088217221	0	0.963457252632055	0	0.231049060186648	0	0.462098120373297	1.05935127678265	2.85723316736142	217.120399569491
AE31	1.06212381051234	1.6622918651904	0	0.447939867307014	0.447939867307014	0.462098120373297	0.87968577653842	0.462098120373297	0.462098120373297	3.9056039334701	0.801098489815601	0.231049060186648	2.58195607659742	0	1.39655158067548	0.346573590279973	0	1.42555537300535	2.81786007441815	217.721994913398
AE32	0.693147180559945	3.57328065126688	0.231049060186648	0.895879734614027	0.173286795139986	0.597253156409352	1.2904003369693	1.13373246055405	0.231049060186648	3.57598289815228	1.2723620215481	0.366204096222703	1.22962648470465	0.366204096222703	2.21805084006107	0	0.231049060186648	1.84314302917047	2.58308488757711	252.025009447371
AE33	0.575646273248511	3.9416781673288	0	0.447939867307014	0.402359478108525	0.597253156409352	0.924196240746594	1.05935127678265	0.732408192445407	2.23660540411934	2.5375897730862	0.231049060186648	1.05935127678265	0	2.33374854068983	1.02358614055553	0.902683400367403	2.68946765285657	2.82570996001206	304.006892684643
AE34	0.274653072167027	1.75263383937987	0	1.17053280678105	0.346573590279973	0.231049060186648	0.767528364331349	0.924196240746594	0.87968577653842	3.52278237043409	1.40450757159062	0	1.47693893294777	0	1.32966134885476	0.346573590279973	0.231049060186648	5.70422388596494	2.87183656790549	213.721603323512
AE35	0.519860385419959	2.95646752248212	1.59583058092735	1.43575079695237	0.173286795139986	1.13373246055405	0.767528364331349	0.87968577653842	0.732408192445407	3.56502233154406	1.28335988762687	0	0.767528364331349	0	0.963457252632055	1.09550665866847	1.11073483672507	1.38629436111989	2.99209964626521	254.958811462688
AE36	0.895879734614027	1.99634122951512	0.732408192445407	0	0.173286795139986	6.25453489828762	1.05935127678265	0.828302216596	0.366204096222703	2.31258104122574	1.48950613739078	0	1.79175946922806	0	3.28963203592217	0.895879734614027	0	4.96567245957648	2.68328377222922	233.802724728067
AE37	0.693147180559945	2.87766151535665	0	0.621226662447	1.16109772478534	3.92401791000132	1.22962648470465	1.3647815207407	1.0729586082894	4.94814045418614	0.78871912020547	1.15524530093324	2.55649841700256	0.231049060186648	1.77270666461474	0	0.597253156409352	3.41746076971863	2.87137318366761	266.766979980765
AE38	0.173286795139986	3.74524871549781	0	0.346573590279973	0.402359478108525	0.462098120373297	1.34178389691172	0.732408192445407	0.828302216596	2.3908941432454	1.43990302299833	0.462098120373297	2.81573327319857	0	0.767528364331349	0.621226662447	0.597253156409352	1.1945063128187	3.7102512070316	224.055265569117
AE39	0.173286795139986	3.79259902571855	0.462098120373297	0.866433975699932	0.173286795139986	2.27623735721389	0.963457252632055	0.998577424517997	0.828302216596	3.29332948315889	1.98213116264808	0.597253156409352	1.24588987276112	0	2.1187025535653	0	0.366204096222703	1.52144939715595	3.12516942196087	276.004614237219
AE40	0	2.15527680498164	0	0.621226662447	0.173286795139986	0.597253156409352	1.09861228866811	1.16550252048883	0.648636716351771	3.39869956996689	1.61895396236267	0.231049060186648	4.16668991207157	0	1.03034748445277	0.761130609430856	0.693147180559945	1.49993655677676	2.59653293158372	242.473766603292
AE41	0.519860385419959	2.2964759660518	0	0.346573590279973	0.346573590279973	0.828302216596	1.11073483672507	2.25075679204725	0.998577424517997	2.97843442306027	2.34150678404912	0.828302216596	0.998577424517997	0.597253156409352	1.55132011671917	0.761130609430856	0.231049060186648	4.60271281687822	2.97986344762727	261.730566202263
AE42	0.173286795139986	2.38836087429137	0	0.173286795139986	0.549306144334055	0.597253156409352	1.05935127678265	1.7309856169634	0.366204096222703	3.66243913921563	1.45455618688764	0.462098120373297	1.79175946922806	0	0.828302216596	0.549306144334055	0.828302216596	2.80762750398167	2.92906047588303	249.602336484495
AE43	0.575646273248511	3.49332976329608	0.462098120373297	0	1.19894763639919	0.963457252632055	1.09861228866811	2.32074782142207	0.693147180559945	4.60842688706875	1.1165066254581	1.61209396898383	2.1187025535653	0	1.26888749659011	0.274653072167027	0.231049060186648	2.14108232117784	2.89224212242709	273.885164174175
AE44	0.621226662447	4.80204053788315	0.231049060186648	0.447939867307014	0.173286795139986	1.05935127678265	1.26888749659011	2.75854368485934	0.924196240746594	4.23112622767036	1.64833261951537	1.88533060360662	2.8511107460107	0	2.53892526956612	0.621226662447	0.462098120373297	2.86410022130101	2.77280045125735	314.067372382429
AE45	0.519860385419959	3.98186695974175	0	1.69498047686806	0.519860385419959	4.05508355033664	1.1945063128187	3.20043359796049	1.24588987276112	4.36898886364524	1.54856102418615	1.22962648470465	3.75071065540137	0	3.69721193550503	0.722592939474041	0.231049060186648	5.17714963203727	2.77514258583416	317.87478900386
AE46	0.967800252726973	3.13034473991555	0	0.274653072167027	0	0.924196240746594	1.08603217934049	1.59859684853225	0.732408192445407	3.91255595772599	1.44615356678495	0	1.64721414086977	0	2.88882496471066	0.173286795139986	1.15524530093324	2.61067139350182	2.99990032882501	246.608721854938
AE47	0.519860385419959	4.91151161889668	2.00375572480139	0.447939867307014	0.346573590279973	0.5364793041447	0.998577424517997	1.88996030766017	0.828302216596	3.21098711275231	1.74251583612532	2.05792870130065	3.502054276644	0	2.50584028353434	0.922219863528484	4.11105297934868	4.43549998424061	2.59459064991011	337.430170765352
AE48	0.693147180559945	3.7369314046949	0.693147180559945	0.519860385419959	0.274653072167027	3.09428235425431	0.854983119153846	3.05469566248624	1.61209396898383	3.84272728749592	2.43803052192536	0	3.06337922155289	0	1.15524530093324	0.748933068388498	0.462098120373297	1.96203467715005	2.77716849664075	286.984622311039
AE49	0.346573590279973	3.27920641619635	0.5364793041447	0	0.274653072167027	0.828302216596	0.231049060186648	1.92691450526411	0.366204096222703	4.18445823329396	1.69650625006938	0	0.924196240746594	1.56071040904141	0.366204096222703	0.693147180559945	0	1.55132011671917	2.26872681160493	247.026648100804
AE51	0.549306144334055	3.9911095180414	0.366204096222703	0.621226662447	0.173286795139986	0.231049060186648	0.462098120373297	3.19477160433099	2.05232632852852	4.14087592286978	1.35089699907471	0	0.366204096222703	1.05935127678265	0.231049060186648	0.722592939474041	0	1.42555537300535	1.73474467353874	247.42719120965
AE53	0.346573590279973	2.00198752676879	0	0.173286795139986	1.70059869083108	0.828302216596	0	4.01615115245885	1.1945063128187	3.23977737066826	1.7954959477927	1.30400766847605	4.36467109479313	1.74724900501988	2.59021507804306	1.40869740079231	0	2.55696494378737	2.30412844045194	284.318789425543
AE54	0.173286795139986	3.25500094012799	0.732408192445407	1.00633792268379	0.447939867307014	1.22962648470465	0	3.89102603233104	1.13373246055405	4.32400359670064	2.00152180462943	1.64721414086977	2.52604849080649	1.84839248149319	2.4194707168651	0.850299345415539	0	1.656604433192	2.22925718761306	282.965946716848
AE55	0.173286795139986	3.52417947862138	0.231049060186648	0.87412689036662	0.173286795139986	4.82267788036257	0	2.58080067393859	1.13373246055405	3.99799096053804	2.36550763330672	1.1945063128187	3.77532306147258	1.49993655677676	0.462098120373297	0.599473818199593	0.693147180559945	3.05378672991815	2.08278945476524	307.670739574915
AE56	0.173286795139986	3.54689084737239	0.462098120373297	1.09550665866847	0.621226662447	1.05935127678265	0.366204096222703	2.86118085731926	1.49993655677676	3.78052983051862	2.44478403984234	0.231049060186648	1.69172460507794	1.46067554489129	0.828302216596	0.641237339365384	1.05935127678265	3.57728822745206	2.24051128627555	328.379066979518
AE57	0	2.14621177012735	0	0.447939867307014	1.08268333507158	0.231049060186648	0.732408192445407	5.29120579142828	1.01484081257447	3.8388308714756	1.78354983936749	1.01484081257447	1.47693893294777	1.83375273684824	4.7283435495439	1.06916652975401	0	6.00261487216843	2.18828381048194	299.240996075759
AE58	0.621226662447	2.43548902497906	0	0.850299345415539	0.519860385419959	0.366204096222703	0.828302216596	3.01008543670747	0.5364793041447	3.05849624442204	1.8552273724048	0.231049060186648	2.47551635746577	2.03493107747166	2.94931158444282	1.52619830810375	0.231049060186648	2.3661252128636	2.10841422740031	280.419189483882
AE59	0.173286795139986	2.47459876610801	0.767528364331349	0.575646273248511	0.173286795139986	0	0.231049060186648	1.62760064086212	0.462098120373297	3.0399533855798	2.44036664351866	0.462098120373297	6.48664892278558	1.5350567286627	0.924196240746594	1.20907047673787	0	2.41139239324995	2.21253599818374	274.583240750457
AE60	0.519860385419959	2.0715494533885	2.45590285745812	0.447939867307014	0.346573590279973	0.828302216596	0.693147180559945	2.0228085294147	0.828302216596	5.01112952703767	1.57770387880398	0	3.3985199910964	1.98441444476259	0.231049060186648	1.242453324894	0	1.52144939715595	1.93229527641326	273.74054296896
AE61	0	4.35197303918314	0	0.447939867307014	0.173286795139986	1.69172460507794	0	2.59231813444081	1.656604433192	3.86442816992911	2.0937599647084	0.597253156409352	2.70716012491692	1.2904003369693	0.963457252632055	0.575646273248511	0.231049060186648	1.24588987276112	1.75086873069763	313.187146258656
AE62	0.346573590279973	4.13469971069853	0.366204096222703	1.54344652597548	0.346573590279973	2.14857327312853	0.231049060186648	2.86024373740674	0.998577424517997	3.55257649120241	1.46367830642658	1.42555537300535	3.58329023633164	1.67021176469875	2.25539723822012	0.519860385419959	0	1.79787584878412	1.86656000028302	285.321657027441
AE63	0.519860385419959	1.84440393560313	1.05935127678265	0.722592939474041	0	0.366204096222703	0	1.75249845734259	0.693147180559945	4.48050250504966	2.11648934751747	0	5.09516749270191	1.96203467715005	0.998577424517997	0.895879734614027	0.231049060186648	2.27187999669144	2.17963998569254	255.383290193284
AE64	0	3.21236859485103	0.462098120373297	0.173286795139986	0.575646273248511	0.231049060186648	0	2.15796356545076	1.2904003369693	3.17257325001982	2.02536629632228	0.462098120373297	4.33949836038881	1.95264438482782	1.58739131159925	1.14877996253365	0	2.21976463989455	2.15096902760979	307.586202426072
AE65	0.173286795139986	3.9586652669628	0.231049060186648	0.173286795139986	0	0	0.828302216596	0.998577424517997	0.366204096222703	4.96005507712077	1.30900616403133	0.366204096222703	3.11203052576058	0	5.3680707401999	0.659764332403815	0	1.33577772841082	1.87596983115021	252.079744004691
AE66	0.447939867307014	3.40834570904968	0.366204096222703	0.173286795139986	0	0.231049060186648	0.87968577653842	1.24588987276112	0.231049060186648	3.1540811639312	1.70182324142067	0	1.4391627045121	0	1.56071040904141	1.81809959814251	0.648636716351771	0.231049060186648	2.28556624906903	239.828847951829
AE67	0.519860385419959	3.40567830278265	0.732408192445407	0.693147180559945	0.621226662447	0	0.998577424517997	0.597253156409352	0.998577424517997	2.15544277664499	2.09924085019013	0.366204096222703	4.17335517759058	0	1.2904003369693	0.967800252726973	0.231049060186648	1.24588987276112	2.26009575231765	247.24001400932
AE68	0.274653072167027	2.02076728872757	0.597253156409352	0.599473818199593	0.173286795139986	0	0.732408192445407	0.231049060186648	0.462098120373297	1.06275310965934	1.58723088525941	0	1.56682678859747	0	0.462098120373297	1.26879345380846	0.366204096222703	0.231049060186648	2.40556392695861	166.3671261868
AE69	0.173286795139986	4.41103607781656	0	0.402359478108525	0	0.597253156409352	0.597253156409352	0.231049060186648	0.767528364331349	3.72894627306399	1.69889073544215	0.366204096222703	5.23530130658766	0	2.7118799677848	0	0	1.75766651952125	2.2516098952831	247.820061955947
AE70	0.173286795139986	4.24552064898955	0.366204096222703	0.677012550275553	2.15579337873837	0	0.597253156409352	4.32117881586993	0.462098120373297	4.05046103086471	1.67290542759783	1.05935127678265	0.902683400367403	0	1.5350567286627	0.447939867307014	0	2.58080067393859	2.12288794465192	262.290866436973
AE71	0.621226662447	3.94061272495291	0.462098120373297	0.346573590279973	0	0.231049060186648	0.597253156409352	1.47693893294777	0.366204096222703	3.08943668278993	2.1789926500099	1.05935127678265	0.767528364331349	0.597253156409352	1.01484081257447	0.519860385419959	0.366204096222703	3.53684587942169	2.10822100089384	247.503946922945
AE72	0.274653072167027	3.48484023644043	0.366204096222703	0.173286795139986	0.173286795139986	2.60587514768446	0.828302216596	3.43764822730461	0.5364793041447	3.95804518935383	2.26237750639535	1.42555537300535	3.11238307294663	0	1.52144939715595	1.17962471782377	0	2.79033689374605	2.39638215829623	286.750551801194
AE73	0	4.27067625625353	0.231049060186648	1.00183329630812	0.621226662447	4.88255139019327	0	2.23398678866751	0.231049060186648	3.07139470404901	2.19351013899392	2.02434817803347	0.924196240746594	1.22962648470465	1.11073483672507	0	0.799298424266124	2.41569352819525	2.50173747560231	316.383119358921
AE74	0	4.97120717153751	0.963457252632055	0.967800252726973	0.346573590279973	1.05935127678265	0.231049060186648	3.96484498115112	0.366204096222703	3.15515208638643	2.00816829556558	0.231049060186648	4.26746867213359	1.47693893294777	2.08460960385849	0.486477537263828	0.597253156409352	2.8197840639088	2.13001640360498	347.226807351568
AE76	0	4.79190742460822	0.366204096222703	0.402359478108525	2.65844649968172	2.32074782142207	0	3.97936505211758	3.34740182394932	2.69137870388776	3.24326323314869	0.597253156409352	3.45799701894117	0.902683400367403	3.48203416626384	1.22070048064659	0	3.70024593703375	2.2891382588448	417.23888818394
AE77	0	4.15603074517036	0.366204096222703	0.866433975699932	0.173286795139986	0.597253156409352	0	4.12011110643596	0.87968577653842	3.23544078428997	2.03691594627685	0	2.90017141618109	0.597253156409352	0.462098120373297	0.519860385419959	0	0.231049060186648	2.19122942293947	266.001119778666
AE78	0	2.70580245233237	0.231049060186648	0.814524134505371	0.346573590279973	0.597253156409352	0	4.22339464969036	0.87968577653842	3.55613885440803	1.91994780860212	0	2.03043662735923	1.59583058092735	0.693147180559945	1.77189342638949	0	0.828302216596	2.69837174385625	264.217113118746
AE79	0	3.67832429361102	0.462098120373297	0.346573590279973	2.16293102109346	0	0	2.75453014420577	0	3.85465023882301	1.03547924845822	0.693147180559945	0.462098120373297	1.47693893294777	2.6953675118897	0.519860385419959	0	1.1945063128187	0.511931276922301	228.663504402733
AE80	0.173286795139986	4.20989494914003	0.693147180559945	1.10770419971083	0.346573590279973	0	0	1.56071040904141	0.998577424517997	4.2610502851705	1.84305704473898	0	0.693147180559945	1.61209396898383	0.767528364331349	0.519860385419959	0.828302216596	0.732408192445407	2.67202865232093	266.185429380321
AE81	1.26879345380846	3.86674122157133	3.14041646187402	0.997246011641069	0	0.231049060186648	0.231049060186648	0.924196240746594	0.462098120373297	4.27110255970684	2.20177111121133	0.597253156409352	0.462098120373297	1.2904003369693	1.52144939715595	0.850299345415539	4.64282555918409	1.94591014905531	1.23149593440996	319.969646410521
AE82	0	2.80083117839907	0	1.03972077083992	0.173286795139986	1.05935127678265	0.963457252632055	1.1945063128187	0.462098120373297	5.18641260781845	2.09204918580228	0.462098120373297	0.231049060186648	1.49993655677676	0.231049060186648	0.173286795139986	0.231049060186648	1.93903705332107	1.29085528354734	278.344633587516
AE83	0	3.21961815574977	0.231049060186648	1.19054348369944	0	0	2.75837387673884	2.2854873281982	0.732408192445407	3.92977085167467	2.98035443802056	0	2.2040136782777	0.693147180559945	1.15524530093324	1.10770419971083	0.828302216596	2.46585384517468	3.49367506553392	319.362489038489
AE84	0.173286795139986	4.48449063358149	0	0.274653072167027	0.173286795139986	0.231049060186648	0.366204096222703	1.42555537300535	0.767528364331349	3.70277260547431	1.86309618399968	0.366204096222703	3.79057683210106	1.59583058092735	0.462098120373297	0.346573590279973	0	1.64721414086977	2.59192908868596	274.779923796643
AE85	0.934417404570842	4.47219329756814	0.597253156409352	1.57473731171399	0.402359478108525	0.597253156409352	0.231049060186648	3.14936554521941	0.366204096222703	3.99628845735785	2.93235931483918	1.31708123952714	3.01008543670747	1.26888749659011	1.1945063128187	2.02992406323931	0	1.47693893294777	2.16278246935228	353.595597348973
AE86	0.346573590279973	4.2875725095428	1.1945063128187	0.599473818199593	0.173286795139986	0	0	2.85785784161745	0.924196240746594	3.93648885495742	1.09224940859728	0.231049060186648	3.42187584530197	1.2904003369693	0.828302216596	0	0	1.81557912388877	0.709973328510857	232.57534228226
AE87	0.173286795139986	3.31981219753809	0.597253156409352	0.997246011641069	0.902729478161056	0	0	1.42555537300535	0.5364793041447	3.66711952933965	1.30328317884699	0	5.34434587921277	0.597253156409352	1.32966134885476	0.519860385419959	0	4.12938139035631	1.4108443978237	241.201238338825
AE88	0.173286795139986	4.72974557710092	0.366204096222703	0.895879734614028	0.173286795139986	0.231049060186648	0.366204096222703	1.2904003369693	0.597253156409352	2.73702907526541	1.87508048856146	0.597253156409352	1.38629436111989	0.767528364331349	1.2904003369693	0.850299345415539	0.231049060186648	1.47693893294777	3.80833859607383	248.809850662202
AE89	0.173286795139986	4.54623572527269	0.462098120373297	0.274653072167027	0	0.462098120373297	0.231049060186648	0.998577424517997	0.462098120373297	3.56679998676118	1.64887249681645	0.231049060186648	0.828302216596	1.09861228866811	0.231049060186648	0.173286795139986	0.693147180559945	0.828302216596	2.67173553557395	240.736505706373
AE90	0.173286795139986	4.44816952901139	1.13373246055405	0.677012550275553	0.346573590279973	0.366204096222703	0.231049060186648	1.34178389691172	0.231049060186648	3.84091232606867	2.51001508036062	0	0.462098120373297	0.963457252632055	2.38798222811418	0.447939867307014	0.693147180559945	1.92691450526411	2.03820452566561	296.090906746767
AE91	0	3.58663513622221	0.231049060186648	0.575646273248511	0	0.828302216596	0	0.924196240746594	0	3.89985793115286	2.2804576483346	0.231049060186648	0.597253156409352	1.22962648470465	0.963457252632055	1.3064366684283	0	1.2904003369693	1.0290579315833	247.987787268436
AE94	0	4.37797233682093	0	0.173286795139986	0	0.462098120373297	0.231049060186648	1.5787328161315	0.732408192445407	3.67438653992392	1.05040999272587	0.231049060186648	3.01476192921537	1.05935127678265	0.693147180559945	0	0	1.05935127678265	0.86691794117773	204.371393555886
AE96	0	3.69283509952097	0.366204096222703	0.447939867307014	0	0	0.366204096222703	1.2904003369693	0.693147180559945	3.76048718891332	1.57172163245225	0.231049060186648	0.828302216596	1.5350567286627	0.693147180559945	0.173286795139986	0	0.963457252632055	0.575050241533593	218.783599483401
AE99	0	4.6066196453217	0	0.346573590279973	0.173286795139986	0.5364793041447	0.366204096222703	0	0.462098120373297	3.79148649402453	1.51700897749733	0	0.366204096222703	0	0	0.402359478108525	0.231049060186648	0	2.13053182380158	296.81233697101
BB02	2.5371275013922	3.54457356761921	0.462098120373297	4.00657139465627	1.5819841959323	1.9012608248854	0.597253156409352	3.09297772114727	2.24127748027374	3.01240047881481	4.37381877907718	1.2904003369693	1.78236917690582	1.4391627045121	1.32966134885476	3.51912847419811	1.68328533574985	1.9012608248854	1.49731769736925	525.293991301506
BB04	0.447939867307014	2.39998860686038	0	1.51006367781935	0.346573590279973	0.462098120373297	0	1.88765349337865	2.40507999291003	3.2908968887769	2.80759100689085	0.462098120373297	1.05935127678265	0.693147180559945	2.05653691083049	1.33677688267937	0	2.69444286959546	1.47967754640196	307.383358985627
BB05	0.794513457586986	3.47565057084661	0.231049060186648	1.29823921272255	0.447939867307014	0.5364793041447	0	2.53826845490369	2.12783554496134	4.57689669614988	2.31431124911197	0.366204096222703	1.3647815207407	1.15524530093324	1.59583058092735	0.722592939474041	0.462098120373297	2.98729300422589	1.55346663852776	337.689809339687
BB06	0.346573590279973	3.96089502194251	0	0.173286795139986	1.49281545994762	0	0	2.24723356488402	2.484906649788	3.66272238199482	2.65714204144119	0.597253156409352	1.52144939715595	0.732408192445407	3.21273969164042	2.03696678248099	0	2.62617806538012	2.8924814979345	349.951398332499
BB07	0.447939867307014	4.06050534677017	0	0.486477537263828	0.967800252726973	0	0	2.65886513643886	2.25231079641585	4.22612103805329	1.9119424549276	0.693147180559945	0.963457252632055	0.963457252632055	1.86614065299946	1.39960548974959	0	2.06818592085623	3.14975950897508	319.287736413904
BB08	1.16349008753938	2.07970284666772	0.366204096222703	0.621226662447	1.79748054268645	0.366204096222703	3.00526142583796	2.41664184557266	1.70798799313442	1.7936100945842	2.62783195666751	0.597253156409352	1.64721414086977	0.963457252632055	2.06000555121752	0.934417404570842	1.30400766847605	2.19076084756467	3.60047259053701	296.703838923263
BB09	0.519860385419959	4.51148211659231	1.11073483672507	1.07937202838408	0.621226662447	0.231049060186648	0.231049060186648	2.57657844379502	2.3108159638575	4.15785620878096	1.91064737225178	0.597253156409352	1.24588987276112	1.2904003369693	1.09861228866811	0.794513457586986	1.49993655677676	2.01341823709247	1.73853436518325	315.75741565148
BB10	0.575646273248511	3.6331830957204	2.81587624267678	2.98301419096055	0.519860385419959	2.18178322011147	2.14857327312853	2.08460960385849	2.49851398129475	3.78343536695928	4.84439326446119	0.597253156409352	1.76275567689818	0.462098120373297	2.04009913965032	2.73948473635462	1.4522362755632	4.05934782426956	2.18131561851925	487.344228524722
BB11	0.621226662447	2.28514446368545	0.648636716351771	0.173286795139986	1.17053280678105	1.35917914796857	0.231049060186648	2.32823877337276	2.40261995714416	4.47044700318848	1.71405927900859	0.597253156409352	1.26888749659011	0.828302216596	0.767528364331349	0.447939867307014	0	1.13373246055405	1.45701968494816	273.349090770864
BB12	1.19687293569551	4.63497327631974	0.693147180559945	0.693147180559945	0.549306144334055	0.597253156409352	0.231049060186648	2.74828646530375	2.22146967345014	3.81082723075119	2.21330342042117	0.732408192445407	0.963457252632055	1.8126931029744	0.998577424517997	0.447939867307014	0.462098120373297	2.17157089695751	1.38441613608159	361.09041103394
BB14	0.677012550275553	2.48159771940593	0	0.722592939474041	0.693147180559945	0.998577424517997	0.231049060186648	1.95924526059321	2.36832181608995	4.13061305951676	2.38732338801866	0.366204096222703	0.924196240746594	1.15524530093324	0.924196240746594	1.86755603397499	0	2.49851398129475	1.5568198322685	330.43077732787
BB15	0.447939867307014	3.15037372094866	0	0.80471895621705	0.772760613339579	0.828302216596	0.5364793041447	2.66476499547199	2.56842082495544	4.32949492361618	1.77634500170452	0	0.693147180559945	1.41616508068312	1.31060854424144	0.575646273248511	0.828302216596	1.64721414086977	1.45252803840032	274.129257527945
BB16	0.621226662447	2.39393457097436	0	0.519860385419959	0.173286795139986	0.231049060186648	0.462098120373297	2.38330561204404	2.1459172165788	4.46303186058368	2.65932082692752	0	1.05935127678265	0.231049060186648	0.998577424517997	2.16467318842248	0.462098120373297	2.20934712539318	2.04080559705688	301.653935646856
BB17	0.173286795139986	3.13483077439482	0.462098120373297	3.09249390420003	0	1.4522362755632	0	0.231049060186648	0	3.25085613728383	2.08259381946508	0	0	0	0.5364793041447	2.00930500778325	0.231049060186648	0.902683400367403	0.49510512897139	213.935926682251
BB18	0.346573590279973	1.79179205459302	1.05935127678265	0.447939867307014	0	0	0.366204096222703	0.828302216596	0.597253156409352	0.990718201228727	1.50203349450194	0	0.231049060186648	0	0.597253156409352	0.346573590279973	0.231049060186648	0.597253156409352	2.17344243717334	144.015280734948
BB20	0	1.53320022154675	0.924196240746594	0.659764332403815	0.173286795139986	0	0	0.693147180559945	0.366204096222703	3.97172913557817	1.44256299889951	0	2.0228085294147	0	2.27623735721389	0.486477537263828	0.231049060186648	1.84839248149319	1.54964986876509	185.545793804315
BB21	0.895879734614028	3.47853672375777	1.1945063128187	0.346573590279973	0	0	0.5364793041447	0.231049060186648	0.597253156409352	1.1333612646916	1.54727231873598	0	0.462098120373297	0	0.231049060186648	0.794513457586986	0.231049060186648	1.42555537300535	1.73360298636546	174.254006365506
BB23	0.173286795139986	1.30699789928282	0.462098120373297	0.621226662447	0	1.1945063128187	0.648636716351771	0.366204096222703	0.366204096222703	2.89623804393718	1.51596952281296	0	0.597253156409352	0	0.231049060186648	0.402359478108525	0.231049060186648	1.24588987276112	2.55131256364777	213.757099716353
BB24	0.173286795139986	1.49987952083632	0.231049060186648	0.794513457586986	0	1.46890641575475	0.732408192445407	0.231049060186648	0.231049060186648	2.7893353856299	1.93211511235941	0	0.231049060186648	0	0.231049060186648	1.09550665866847	0	0.648636716351771	0.652049741638262	171.223111145345
BB25	0.693147180559945	3.62109805201089	0.693147180559945	0.823959216501082	0	2.87367084001841	0.231049060186648	0.597253156409352	0.924196240746594	3.34323897623096	2.03729188019349	0	0.231049060186648	0	1.54165760442809	0.274653072167027	0.231049060186648	1.69172460507794	1.08001149500312	231.479463279918
BB26	0	3.92798479679107	0.767528364331349	0.274653072167027	0	0.231049060186648	0.231049060186648	0.231049060186648	0.828302216596	0.883865585378229	1.5777943667306	0	0.231049060186648	0	2.36224597817019	0.173286795139986	0	0.828302216596	1.00703640589369	172.038561873383
BB33	0.621226662447	3.32495401122749	1.72349466501272	0.621226662447	0	0	3.66692187273037	0.231049060186648	1.1945063128187	3.1576343704424	2.13731608888196	0	0.462098120373297	0	2.35662470948619	1.14108704786696	1.13373246055405	1.24588987276112	0.923066882336245	226.516712304121
BB34	0.823959216501082	2.34463667607884	7.95384894568416	1.50281679360104	0.173286795139986	1.30400766847605	0.5364793041447	0.366204096222703	0	1.41966116538989	2.91567831582099	0	1.3647815207407	0	0.828302216596	1.28976382480363	0.462098120373297	1.96203467715005	0.831015879994743	385.93092961813
BB36	0.447939867307014	3.89819026992828	2.03194152081074	5.1768715984452	0	1.61734342130654	0.597253156409352	0.462098120373297	0.462098120373297	1.03303019766444	2.88521645901679	0	0.462098120373297	0	0.597253156409352	0.173286795139986	0	0.732408192445407	1.05679450507486	256.519971622939
BB37	0.447939867307014	3.91616210770379	0.767528364331349	1.49153668478092	0.841823957496619	0	0.231049060186648	0	0.828302216596	0.854840027522545	1.54229536438023	0	0.366204096222703	0	2.3897833388902	1.03972077083992	0	0.902683400367403	1.09841619098069	207.757459138916
BB38	0.895879734614027	1.94541774815699	1.3647815207407	0.934417404570842	0.173286795139986	1.9012608248854	4.71018105699962	0.767528364331349	0	0.97749485512951	3.30904516781842	0	0.231049060186648	0	0.231049060186648	0.761130609430856	0.231049060186648	1.15524530093324	2.52007873306263	240.352337069955
BB39	3.48760649809024	2.06036643842772	1.1945063128187	0.895879734614027	0	0	2.36995982102409	0.828302216596	0.462098120373297	1.00126285345922	1.15973498365145	0	0.231049060186648	0	1.2904003369693	1.09550665866847	0	1.26888749659011	0.789918441073061	201.615988589956
BB43	0	3.04045903083249	0	1.49535355281362	0.173286795139986	0.231049060186648	0	1.49244560482607	0.366204096222703	2.14880279355108	2.86078717556782	0	0.767528364331349	0	1.03034748445277	0.833051127543801	0.231049060186648	2.39512900519347	1.16198298399274	305.005892517637
BB44	0.173286795139986	3.97149859120453	0.231049060186648	0.173286795139986	0.447939867307014	0.462098120373297	0.5364793041447	0.902683400367403	0.732408192445407	2.29034266379292	0.928318634049663	0	0.231049060186648	0	0.462098120373297	0.621226662447	0	0.902683400367403	0.594126154765667	181.039804364225
BB45	0.173286795139986	3.17736873227134	0.231049060186648	1.35402510055111	0	0.462098120373297	0.462098120373297	2.15641677226526	2.39764474040527	1.08776182569686	4.39156924948738	0	1.11073483672507	0	0.597253156409352	2.17909296631915	0	3.40852368390175	0.476029215739315	325.474528962588
BB46	0.173286795139986	3.64027403533522	0	2.86503934985789	0.173286795139986	1.15524530093324	2.29001780393271	1.61209396898383	2.21110614442679	1.14079719250227	5.23199255303251	0.231049060186648	0.597253156409352	0	2.3450895330937	1.6955480140017	0	3.97313002447049	0.465442362574497	394.205553687375
BB47	1.20100526118331	3.92643564456546	0.231049060186648	3.11769507898052	0	1.32966134885476	1.94784813901045	1.18511602049647	1.42555537300535	0.883816055906737	5.42992292865016	0.231049060186648	0.828302216596	0.462098120373297	1.13373246055405	2.07889162089107	0.462098120373297	3.85199498481023	0.526982779159134	365.433550635949
BB48	0.693147180559945	1.90259352825451	0.767528364331349	2.46172930026193	0.173286795139986	0	5.93676767873813	1.11073483672507	0.597253156409352	1.17640490176499	3.14956782829063	0	0.366204096222703	0	0	0.402359478108525	0.854983119153846	1.76610578884935	0.553028715843984	249.413601974103
BB49	0	3.54305097940387	2.48912368897252	1.88713899479247	0.173286795139986	1.22962648470465	1.01484081257447	0.462098120373297	1.70198182463353	2.37440947018026	5.14976631401913	0	0.366204096222703	0	1.15524530093324	4.48272806359432	2.09964974895198	5.64213494508985	0.577578752547793	453.8752331644
BB50	0.621226662447	2.36846038239076	0.366204096222703	0.346573590279973	0	0.231049060186648	2.9393954259759	0.462098120373297	0.87968577653842	1.20093878270963	2.86136108336322	0	1.05935127678265	0	0.828302216596	1.45723640440255	0	2.32326355663386	2.50916265424042	234.481600630179
BB51	0	4.7278794169596	0	0.346573590279973	0	0.231049060186648	2.45400351708658	0.693147180559945	0.767528364331349	1.29698914263811	1.30856424497342	0.231049060186648	0.366204096222703	0	1.826879641114	0.794513457586986	0	1.64721414086977	0.627778450667491	193.719759470164
BB53	0.599473818199593	1.24615845565877	0	0.519860385419959	0.173286795139986	0	0.231049060186648	1.32966134885476	0	2.37049108832323	1.51759506998738	0.366204096222703	1.1945063128187	0	1.05935127678265	0.274653072167027	0	0.597253156409352	0.762505439957331	152.083652059945
BB54	0.447939867307014	3.64930152221728	0	0.173286795139986	0	0	0.366204096222703	0.693147180559945	0.366204096222703	3.86352481457206	1.25944918211173	0	0.902683400367403	0	0.462098120373297	0.621226662447	0.231049060186648	0.5364793041447	2.44318955153536	214.646676890657
BB55	0.274653072167027	1.39621884496899	0.944404448018739	0	0.173286795139986	0	1.11073483672507	0.828302216596	0.231049060186648	1.13570883777216	1.9365934094227	0	0.693147180559945	0	0.597253156409352	0.402359478108525	0	1.78236917690582	1.04474576958433	339.252522332506
BB56	0.173286795139986	3.97795237193724	1.54165760442809	1.94329342012063	0	2.2747912233477	4.49673379396292	1.15524530093324	1.72538324419128	1.36951138189225	5.12431135225885	0	3.36591256006512	0	0.693147180559945	1.40052970521993	1.08603217934049	1.32966134885476	0.72502483074769	350.256181465697
BB59	0.346573590279973	2.37655151210877	0.231049060186648	1.17962471782377	0.621226662447	0.462098120373297	0.998577424517997	0.963457252632055	0.693147180559945	1.33426115449446	1.90590887728638	0.231049060186648	0.767528364331349	0	0.462098120373297	1.03178359626127	0.5364793041447	2.4423744307531	2.80565427564528	199.852547092826
BB62	3.65837064724241	3.16126912596515	3.3042151634403	2.39973264071488	0.173286795139986	0.924196240746594	1.15524530093324	1.75766651952125	1.738311919203	1.35094363871319	4.94021109945882	0	5.09310195358136	0	3.24244895160575	2.19411894733658	0	2.68600360026736	0.701807840819436	444.237247846935
BB65	0.346573590279973	4.2236432850365	1.73649538428047	4.35495219270612	0	0.462098120373297	0.87968577653842	1.13373246055405	1.81557912388877	0.954218703231071	2.26360778554895	0	0.366204096222703	0.924196240746594	0.767528364331349	0	0	0.597253156409352	0.396084103177112	242.327805142251
BB67	0	3.89688235833187	0.366204096222703	1.61261760553604	0.173286795139986	2.6748449572019	0.693147180559945	0.998577424517997	0.366204096222703	1.07846578520472	2.93145044785155	0	1.13373246055405	1.2904003369693	0.462098120373297	0	1.59304116437051	2.24327469016316	0.476029215739315	270.216057781456
BB68	0.173286795139986	1.83381533809092	0	0.967800252726973	0.173286795139986	0	2.05792870130065	0	0.231049060186648	0.648602001361336	2.2604710566742	0	6.08861150520688	0	0.924196240746594	0.173286795139986	0	1.24588987276112	0.396084103177112	163.247904965101
BB69	0.173286795139986	4.32640523496793	0	2.92899106583823	0.173286795139986	0	0.963457252632055	0.902683400367403	0.231049060186648	1.27607043948943	3.0294959578664	0	0.5364793041447	0.963457252632055	0.828302216596	0	0	2.7021715054184	0.255965638461151	275.645751161953
BB70	0	4.28077358383694	0	3.54747649074872	0	0.231049060186648	3.47534144407671	0.693147180559945	0	2.0981578345876	2.62402557007601	0	0.693147180559945	0.462098120373297	0.366204096222703	0.621226662447	0	0.462098120373297	0.898795591365474	237.02532858064
BB71	0.575646273248511	1.44619469222478	0.231049060186648	0.621226662447	0	0	5.42731227530139	0.231049060186648	0.462098120373297	0.744218872431131	1.53362995854953	0	0.597253156409352	0.462098120373297	0.231049060186648	0.621226662447	0	0.462098120373297	1.33144160513361	132.121399106169
BB72	0.173286795139986	2.13211727296468	0.366204096222703	2.13910347614238	0	0.231049060186648	3.83104361254735	0.462098120373297	0.462098120373297	0.667861311441619	2.85703813268183	0	0.828302216596	0.5364793041447	0.366204096222703	1.4308962754881	0	1.3647815207407	3.14368274775134	212.334224271514
BB73	0	3.82314417062162	0.231049060186648	3.35242784851642	0	0	0.231049060186648	0.462098120373297	0.462098120373297	0.590839736314674	2.09759891309205	0	0.366204096222703	0.231049060186648	2.07617033453039	0	3.27306053449429	1.09861228866811	1.01801246761416	230.513601537454
BB74	0.173286795139986	1.80786799158242	0.231049060186648	0.794513457586986	0	0	4.28722716564497	0.828302216596	0.231049060186648	0.447939867307014	2.05910423276066	0	0.87968577653842	0.366204096222703	3.22786291046227	0.641237339365384	0	2.88390802812461	2.23084956290464	212.165112717753
BB75	0.519860385419959	3.89441762297707	0.231049060186648	3.41153143982404	0	0	4.94283077799747	1.93403945845902	0.366204096222703	1.27389451082246	1.03753261251266	0	0.963457252632055	1.6424178950524	1.82548785064384	0.173286795139986	0	2.30124908586153	1.45082878302145	289.720181083068
BB76	0.447939867307014	2.01004404100507	0.462098120373297	0	0	0.231049060186648	6.96434472356685	0	0.231049060186648	0.692821022283184	1.77920851414143	0	0.597253156409352	0.597253156409352	0.231049060186648	0.173286795139986	0	0.231049060186648	0.396084103177112	144.552215609138
BB77	0.621226662447	3.70097768299198	0.231049060186648	4.30802061918316	0.173286795139986	0.231049060186648	1.13373246055405	2.23234474922216	0	1.37178271221055	2.66620855451867	0.366204096222703	0.231049060186648	0.597253156409352	0.462098120373297	1.52731189569109	0	0	0.277987164150759	217.297636166101
BB78	0.447939867307014	3.39198327163761	0	2.34607341977491	0	0	1.89791071293423	0.767528364331349	0.231049060186648	0.64285259540409	2.29645719147352	0	3.5326279841655	0.366204096222703	2.05792870130065	0	0.231049060186648	1.75249845734259	0.427961753364856	220.168576504258
BB79	0	2.08430173623322	0	1.87719679265857	0	0.231049060186648	0.231049060186648	1.08603217934049	0.231049060186648	0.822924006501202	2.09696210952973	0	5.99971497024352	0.998577424517997	3.26006311206388	1.43814315970641	0	2.34036132142971	0.969853106141739	197.905813292875
BB80	0.173286795139986	1.91348623357219	0	0.850299345415539	0	0.231049060186648	1.2904003369693	0.597253156409352	0	1.13834793138794	3.10616454442456	0.231049060186648	3.35476250181328	0.231049060186648	1.6424178950524	2.33362575364915	0	1.05935127678265	2.32856701533861	223.74089679879
BB81	0.274653072167027	2.48096960250337	0	0.794513457586986	0	0.231049060186648	0.924196240746594	0.597253156409352	0.366204096222703	3.47520853891447	2.11655220015729	0	0.231049060186648	0.693147180559945	1.83511051197745	1.2130075659799	0.5364793041447	1.80536680073481	2.11748164665251	226.881239884134
BB82	0	4.32627748637493	0	0.173286795139986	0	0.231049060186648	1.13373246055405	0.462098120373297	0.902683400367403	1.56120429393054	0.808459929544124	0	0.5364793041447	0.231049060186648	0.5364793041447	0.549306144334055	0	2.32074782142207	1.05740593982055	168.846362503332
BB83	0.519860385419959	2.27749272519273	0	0.850299345415539	0	0.231049060186648	1.80388201728501	0.924196240746594	0.366204096222703	1.3294225044149	1.00708829394087	0	1.32966134885476	0.597253156409352	1.95264438482782	0.173286795139986	0.231049060186648	4.81175291525148	1.37737188184364	188.939900476716
BB84	2.33136329476917	3.24702909054972	0	0.173286795139986	0	0	2.11168475049935	0.597253156409352	0.597253156409352	3.60287222029458	1.00356693432003	0	0.828302216596	0.693147180559945	0.231049060186648	0.447939867307014	0	1.76610578884935	1.1465957421352	188.067202022915
BB85	0.659764332403815	1.45598325231081	0.231049060186648	0.346573590279973	0	0.231049060186648	1.05935127678265	0	0	1.66715096145699	0.634396726904228	0	0.767528364331349	0.231049060186648	0.998577424517997	0.402359478108525	0	0.597253156409352	2.61488306342209	128.484986051699
BB86	0	4.12285597355153	0	1.00633792268379	0	0	2.73959571853383	0.462098120373297	1.22962648470465	0.97172129808288	1.97725272108761	0	0.732408192445407	0.231049060186648	0.366204096222703	0.519860385419959	0.462098120373297	1.42555537300535	0.553028715843984	187.019663308238
BB87	0.621226662447	4.38030568842374	0	2.79105467267017	0	0.767528364331349	2.58682234307114	1.70798799313442	1.54813029971379	0.848426607427867	4.20021416069798	0	3.83511896515676	1.38629436111989	2.01341823709247	4.05232535479439	0	3.0903530356703	1.10839436345109	363.722938681913
BB89	0	1.24877331279438	0	0.447939867307014	0	0	0	1.05935127678265	0	0.813108753529837	1.62698715901512	0	0.462098120373297	0.963457252632055	3.58794755069333	0.621226662447	0.231049060186648	1.98441444476259	2.6118984443107	157.714614187766
BB90	0	4.77161621966553	0.366204096222703	1.31952866480763	0	0	0.231049060186648	0.366204096222703	0.5364793041447	0.993492032698183	3.23614037929754	0	0.462098120373297	2.36777402084204	0.597253156409352	1.46305061994362	0	0.597253156409352	1.40333735829383	226.699412965633
BB91	0.173286795139986	3.96730889972647	0	4.21974727324409	0.173286795139986	0.231049060186648	0	1.64721414086977	0.998577424517997	1.06731351796677	4.1595399425648	0.366204096222703	0	1.57283295709836	0.998577424517997	0	0.231049060186648	1.30400766847605	0.610952302716579	247.811319940371
BB92	0.274653072167027	2.22082172902382	1.05935127678265	1.27035109124612	0.549306144334055	0.767528364331349	5.71305033365955	0.963457252632055	0	1.27004539561667	2.03207197370467	0.231049060186648	0.231049060186648	0.828302216596	0.366204096222703	1.89771303092215	0	0.732408192445407	2.46019482159466	217.371204167029
BB93	0	2.07159860151866	0	0.621226662447	0	0	1.22962648470465	0.366204096222703	0.231049060186648	2.78604680896271	1.70823406980624	0.366204096222703	0.366204096222703	1.11073483672507	0.366204096222703	2.38059338382295	0	0.732408192445407	2.03984625257523	166.640415753611
BB94	0	3.06351065686176	0.231049060186648	0	0	2.02434817803347	0	0.767528364331349	0.231049060186648	1.05082803935595	2.64196829177618	0.366204096222703	0.693147180559945	0.366204096222703	7.03790526255812	0.346573590279973	0	2.17695920924196	0.642829952904324	206.570852347985
BB97	0	1.69347374139004	0	1.19687293569551	0.173286795139986	0	3.25034514311482	0.231049060186648	0	1.4946619859124	1.35432969047709	0	0	0.597253156409352	0.597253156409352	0.274653072167027	0	0.366204096222703	3.07486794214077	147.534370577523
BB98	0.173286795139986	1.751773101057	0	0.519860385419959	1.41918845056707	0.231049060186648	1.1945063128187	1.1945063128187	0.828302216596	3.19255204826129	1.94668617724957	0	0.462098120373297	1.46067554489129	1.59583058092735	1.54344652597548	0	0.828302216596	1.28650396819239	217.737736840338
BB99	0.173286795139986	1.61037956707944	0.231049060186648	0.794513457586986	0	0.366204096222703	0.231049060186648	1.13373246055405	0.767528364331349	1.30906071166074	1.47141015982196	0	0	1.78236917690582	0.462098120373297	0.866433975699932	0.231049060186648	0.924196240746594	2.99858015747449	175.019865267531
BCW01	0.346573590279973	2.18632307779948	0.732408192445407	0	0.402359478108525	0	2.04948943197255	1.79175946922806	0.462098120373297	1.62644866763323	0.947075171077809	0.231049060186648	4.59047775690778	0	0.5364793041447	0	0	1.56071040904141	2.29699603043909	191.128343193156
BCW02	0.173286795139986	1.84278273340543	0.5364793041447	0.346573590279973	0.173286795139986	0	0	2.09221449644721	0.963457252632055	3.17669122448659	0.613865222718476	0.231049060186648	1.15524530093324	0	0.231049060186648	0.173286795139986	0.231049060186648	1.42555537300535	1.05034872860623	153.10202040465
BCW03	0.173286795139986	2.11578846294635	0.597253156409352	0.173286795139986	0.274653072167027	0	0	1.826879641114	0.828302216596	3.00690172750567	0.789075246525134	0.231049060186648	1.3647815207407	0	0.462098120373297	0.173286795139986	0	1.22962648470465	1.38503323053081	158.421496760074
BCW04	0.173286795139986	3.6421911690101	0.828302216596	0.447939867307014	0.173286795139986	0	3.57280326334066	1.80536680073481	1.95264438482782	1.68843053127515	1.32925927132025	0	4.12290902194955	0	1.26888749659011	0.621226662447	0	2.23234474922216	3.56519611698328	256.764743687618
BCW05	1.55860268142959	1.53829102058389	1.8184403717859	0.173286795139986	0.346573590279973	0.231049060186648	0.231049060186648	2.14108232117784	0.366204096222703	1.29851652856361	0.806699249733706	0.231049060186648	1.77270666461474	0	0.5364793041447	0.346573590279973	0.231049060186648	1.86982393172832	2.23963688343443	200.505298503081
BCW06	0.173286795139986	4.16725885856982	0	0	0	0	0	1.98354751752924	0.924196240746594	1.58115633034041	1.150999862253	0.231049060186648	1.3647815207407	0	0.462098120373297	0.346573590279973	0.231049060186648	1.77917935990044	3.83580974811139	197.599502208288
BCW07	0	1.82004332658343	0.231049060186648	0.173286795139986	0.693147180559945	0	0.231049060186648	1.656604433192	0.231049060186648	1.2459322825641	0.858366660557735	0	1.49244560482607	0	0.462098120373297	0.173286795139986	0	2.06818592085623	2.68919049104219	178.108039754725
BCW08	0.173286795139986	1.4840967101578	0.231049060186648	0.173286795139986	0	0.231049060186648	1.26139654463942	1.2762137988297	0	1.49745554358228	1.01801141688025	0.231049060186648	0.732408192445407	0	0.5364793041447	0	0	1.32966134885476	5.61934001514519	165.147528492913
BCW09	0.519860385419959	1.9349643176115	0.693147180559945	0.173286795139986	0.346573590279973	0	0.231049060186648	1.656604433192	1.95454372519937	3.25571484925162	0.64656823170376	0.366204096222703	0.924196240746594	0.693147180559945	1.05935127678265	0.274653072167027	0	1.79175946922806	2.68932501043464	193.889157639608
BCW10	0.748933068388498	2.3415766647448	0	0.895879734614027	0.895879734614027	0	0	2.34450216142923	2.13230988507205	3.38588251119357	0.912099184331845	0.597253156409352	1.42555537300535	1.47693893294777	0.366204096222703	0.274653072167027	0.231049060186648	1.9012608248854	3.58716959095061	224.895550597649
BCW11	0.997246011641069	4.53048817691213	0.366204096222703	0	0.447939867307014	0.231049060186648	0	2.49702919784496	2.00538571989945	1.94864737872033	0.995414799744413	0.231049060186648	1.0729586082894	0.963457252632055	0.998577424517997	0.274653072167027	0.693147180559945	1.86860068876533	3.11872772967024	231.968775168516
BCW12	0.447939867307014	1.61980907114839	0.231049060186648	0.447939867307014	0.866433975699932	0.693147180559945	0	2.4377401290301	1.49244560482607	1.69671977474182	0.763377550948709	0.462098120373297	4.29439312099036	0.597253156409352	0.902683400367403	0.346573590279973	0	2.2805384921592	3.42524818192899	226.737399976407
BCW13	0.274653072167027	2.09761701015017	0.231049060186648	0.346573590279973	0.621226662447	0	0.597253156409352	2.22146967345014	1.42555537300535	1.6269090739609	1.2282274827352	0	1.4391627045121	0.597253156409352	1.05935127678265	0	0	2.12557564929954	1.73243277688425	218.040609077132
BCW14	0.794513457586986	4.06089819861558	0	0.922219863528484	0.677012550275553	0.231049060186648	0.366204096222703	1.9887155797079	1.47693893294777	3.25502570718087	0.703836402445895	0.828302216596	0.902683400367403	0.462098120373297	0.366204096222703	0.346573590279973	0	1.76275567689818	1.59777448542831	220.789386237611
BCW15	4.91874451939111	1.6823009152131	0.366204096222703	0	0	0	0.366204096222703	2.59440800544535	1.49993655677676	1.58983830838777	0.715231499745517	0	1.87826320105642	1.13373246055405	1.05935127678265	0.549306144334055	2.37962233331517	2.33435515292882	3.24865432623744	241.822132108476
BCW16	2.60151984284375	1.60486769142413	0.366204096222703	0.173286795139986	0.621226662447	0.231049060186648	0.231049060186648	2.13507615267695	1.69172460507794	1.46143360181038	0.890791272646183	0.732408192445407	3.21186936912684	0.462098120373297	0.963457252632055	0.346573590279973	0	1.72349466501272	2.95363092258566	217.588171619826
BCW17	0.274653072167027	0.859815519964288	0.462098120373297	0.173286795139986	0	0.231049060186648	0	0	0.597253156409352	1.2783304650077	0.792752777776568	0	0.366204096222703	0	0.828302216596	0.173286795139986	0	1.56071040904141	3.51844812227025	133.187781112324
BCW18	0.274653072167027	1.43848317098493	0.462098120373297	0.519860385419959	0	0	0	1.22962648470465	0.693147180559945	1.24471571594567	0.927806336099402	0	0.366204096222703	0	0.828302216596	0.346573590279973	0.231049060186648	0.924196240746594	3.16459661619841	145.939440250452
BCW19	0.346573590279973	1.68231491361033	1.05935127678265	0	0.173286795139986	0.231049060186648	0.231049060186648	0.828302216596	0.462098120373297	1.08354151462864	0.776695876915004	0	0.693147180559945	0	0.5364793041447	0.274653072167027	0	1.05935127678265	2.84708491814573	131.145752463158
BCW20	0.447939867307014	3.42943598939767	0.462098120373297	0.621226662447	0	0.231049060186648	0	0.597253156409352	0.462098120373297	2.69924546003148	0.797064832244502	0	0.648636716351771	0	0.231049060186648	0.274653072167027	0.732408192445407	1.2904003369693	1.73445915331167	180.447924310286
BCW21	0.519860385419959	1.2487675321043	0.597253156409352	0.173286795139986	0	0.366204096222703	1.2125287199088	0.597253156409352	0.231049060186648	1.18515993506539	0.836074476561564	0	0.231049060186648	0	0.767528364331349	0.173286795139986	0	0.963457252632055	0.697543131798053	133.698266273127
BCW22	0.173286795139986	1.10784840579883	0.693147180559945	0	0	0	0	0.597253156409352	0.231049060186648	2.81409197975927	0.500895983581214	0	0.462098120373297	0.366204096222703	0	0	1.38104490879718	0.5364793041447	0.297063077382834	99.4643881267106
BCW23	0.748933068388498	1.12478029554763	0.231049060186648	0.922219863528484	0	0	0.462098120373297	0.767528364331349	0	1.04310958186591	1.11020453312418	0	2.24446729727912	0.231049060186648	0.462098120373297	0.447939867307014	0	1.22962648470465	1.57951257521262	150.301738445562
BCW24	1.84192714309359	1.0792635450126	1.09861228866811	0.621226662447	0	0.366204096222703	0.924196240746594	0.828302216596	0	0.779536726329162	1.24069264508358	0	4.94391647498463	0	1.67021176469875	0.402359478108525	0.366204096222703	1.3647815207407	1.17779953662607	216.753573473746
BCW25	0.967800252726973	1.59997823281994	0	0.447939867307014	0.173286795139986	0	0	2.41569352819525	1.84314302917047	1.49140032688429	1.04535530894729	0.231049060186648	1.49993655677676	0.693147180559945	1.11073483672507	0.346573590279973	0.231049060186648	2.79187654236482	1.47247876846819	220.285190435082
BCW26	0.519860385419959	2.27536744116772	0	0.346573590279973	0.447939867307014	0	0.231049060186648	2.12895977312088	1.92691450526411	3.22883558126071	0.877123197585881	0.231049060186648	0.5364793041447	1.2904003369693	0.597253156409352	0	0	1.05935127678265	2.73951748939012	207.725414615463
BW01	3.74134083490649	4.65569617004257	0	0.693147180559945	0.772760613339579	0.732408192445407	0.231049060186648	2.68946765285657	1.57283295709836	4.502960829711	1.73949044625791	1.05935127678265	2.61592084582454	0	2.30258509299405	0.274653072167027	0.231049060186648	4.84510832853529	1.37482480710479	321.891417949889
BW02	0.922219863528484	5.42762242318705	1.49993655677676	0.575646273248511	1.55564406701784	1.1945063128187	0.231049060186648	2.2607306853356	1.47693893294777	4.41887810622258	1.75553510062193	0.5364793041447	1.1945063128187	0	0.828302216596	0	0	2.0408309365048	1.2176248643559	301.572933272706
BW03	1.52731189569109	5.15904852853295	0.366204096222703	1.4308962754881	4.00860866379208	1.61734342130654	0.732408192445407	3.87991143727798	1.42555537300535	4.50456114397948	1.27681545299631	1.1945063128187	3.11843538074212	0	1.97829806520653	0	0.231049060186648	6.01779065354057	1.52637794434554	400.233212682517
BW04	1.04741368550661	4.61611919247424	0.693147180559945	1.80527627454562	2.78380778845185	0.732408192445407	0.231049060186648	5.93614177120141	4.87149444867002	4.29578364517158	2.16721529861301	1.9756420086568	3.40931983381159	0	2.38901262563741	0	0	5.00599875236573	2.26252313034522	399.075036756216
BW05	0.794513457586986	5.1002498234462	0.231049060186648	0.519860385419959	3.38947041597797	1.77270666461474	0.597253156409352	5.02729219463915	3.89657728035869	3.58844765546028	2.68063951881787	1.52144939715595	2.28618834493045	0	1.71968509973818	0.722592939474041	0.231049060186648	5.27124757403084	1.78812086417219	405.054483387549
BW06	0.447939867307014	4.94871258227883	0.5364793041447	0.173286795139986	3.33662940445005	0	0	6.2260196998025	4.21891669881996	3.55321630504709	2.48109869919263	3.07276951387512	3.80758302821248	0	2.1803433330633	0.946047408479565	0	3.95780935801443	1.90034748559214	393.173208929105
BW07	0.173286795139986	4.93692903201348	0.902683400367403	0.173286795139986	2.43700066242393	0.231049060186648	0	5.92468062934996	3.28071464076503	4.08154288577644	1.62881199368612	3.16925824529021	3.91634157581488	0	2.87779164856855	0.274653072167027	0.462098120373297	4.76937715902514	1.55346663852776	357.230364246841
BW08	0.621226662447	4.58903718791249	0.231049060186648	0.519860385419959	1.64481280300253	1.30400766847605	0.231049060186648	6.57447395213465	3.84916692986997	4.25173996893621	2.03335074669555	2.1958500049416	3.77892825575045	0	3.77919052583062	0.346573590279973	0.231049060186648	4.56669990215098	0.976147390398029	343.730131197865
BW09	0.895879734614027	5.13938681633261	0	0	1.72893086215783	0.462098120373297	0	4.78934077159175	0.963457252632055	4.34687323038083	1.45346008559605	3.62680096874224	3.64245876500277	0.998577424517997	3.15447699988612	1.00633792268379	0	4.01237771607649	1.30128169679827	363.452422126354
BW10	1.22070048064659	5.10908395209148	0.597253156409352	0.621226662447	2.04717228111105	0	0	4.85751118003723	1.2904003369693	4.70873452934929	1.67856255306914	2.96793840390764	3.098533405309	1.57283295709836	3.68031195499648	0.693147180559945	0	4.11115864152118	2.11834152159159	362.170460874454
BW11	1.22631869460961	5.25858272464072	0.597253156409352	0.621226662447	1.36383027883943	0.462098120373297	1.24588987276112	3.09666099987613	2.81010908613153	4.60639385367499	1.64084161420224	1.67021176469875	2.92641657207635	1.79175946922806	2.59717427305024	0.346573590279973	0	4.8480002502654	1.55806708716986	381.067059875621
BW12	1.76746853211464	4.64313915997433	0.366204096222703	0.173286795139986	2.22703840333038	0.902683400367403	0.231049060186648	5.79717967088704	4.76278982732447	4.49179992962927	2.76763079352408	2.43236366838681	2.84172045368847	2.12387061574395	3.05493995222479	0.274653072167027	0	5.03639869578383	1.4399701481435	426.230850252567
BW13	0.346573590279973	4.49478481013042	0	0.173286795139986	0.915890411532412	0	0.231049060186648	5.94584748619158	2.1788971991971	4.21236981217178	1.54329008033685	0.366204096222703	3.47709609350269	1.52144939715595	3.29357685513784	0.173286795139986	0	3.98282881596637	1.20881149735514	298.146284110961
BW14	2.33402289432044	4.58012103575102	0	0.274653072167027	1.98744930404046	2.23234474922216	0	2.76684286873325	4.69333392986725	4.33386849699394	1.87331343152538	0.366204096222703	2.80571727907867	1.49993655677676	1.4847824320845	0.346573590279973	0.231049060186648	5.06095047705569	2.01027409401585	349.378827469144
BW15	0.173286795139986	4.60951943109602	0.597253156409352	0.447939867307014	1.57473731171399	1.05935127678265	0	5.73787242280628	2.41569352819525	4.33762037124867	2.4108218692505	0.767528364331349	3.41391463698361	1.61734342130654	4.04017158572284	0.693147180559945	0	4.42782724218239	0.840872004492879	355.109156095241
BW16	0.850299345415539	4.92822865129368	0.366204096222703	0.402359478108525	0.346573590279973	0.366204096222703	0	3.62347779172974	2.68526415032592	4.50214957593935	1.51682235448617	1.05935127678265	3.26269223367493	1.79175946922806	4.22795900656535	0.173286795139986	0	4.12905336926977	1.04512621492997	332.477900305511
BW17	0.447939867307014	4.51252009635748	0.462098120373297	0.621226662447	2.28363466463998	0.462098120373297	0.231049060186648	3.29087196295635	0.5364793041447	4.56601708091884	1.99700104054651	2.00538571989945	3.97913619297138	1.26139654463942	1.65194235253375	0.621226662447	0.231049060186648	1.4391627045121	1.95422976531339	319.426228789522
BW18	0.173286795139986	4.60953879181429	0.366204096222703	0.549306144334055	2.54318775986597	0.828302216596	0.597253156409352	4.14013651058538	0.462098120373297	4.02093625546806	1.44622609138973	0.597253156409352	3.55588407344378	1.74724900501988	2.48024456912975	0.722592939474041	0	4.63425613485926	1.66555137490168	310.888237979717
BW19	0	5.70689532438259	0.462098120373297	0.447939867307014	1.06916652975401	0.366204096222703	0	2.92342793969947	1.2762137988297	4.3990332375678	1.58165021479344	3.97958939947673	3.08009581611471	1.57283295709836	4.02880344838716	0	0	3.53907378890149	2.05337478613014	336.663302250855
BW20	0.173286795139986	4.57631998627866	0	0.447939867307014	1.04741368550661	2.58724832821964	0.231049060186648	2.6304435858873	4.06986215494332	4.96930815758777	2.06980699457039	1.75595271968778	2.45400351708658	1.1945063128187	3.26515226944081	0.346573590279973	0	2.8998382494034	1.61795770326173	327.526756057558
BW21	0.346573590279973	3.89873908610574	0.231049060186648	0.519860385419959	1.76296390573897	1.13373246055405	0.231049060186648	2.16609404982548	0.462098120373297	4.94280848027621	2.03289139758009	1.2904003369693	3.58119604868408	1.52144939715595	4.60099481086629	0.173286795139986	0	4.73721744620385	1.58524035481288	382.598793622737
BW22	0.519860385419959	4.78885448212625	0.597253156409352	0.173286795139986	2.15583834681116	0.693147180559945	0.902683400367403	5.05493907695795	3.60028002779668	4.77609603706265	1.99905884345687	2.69720913720036	3.08874933463816	1.1945063128187	3.58194343315264	0.447939867307014	0	5.0262669257142	1.15155082184776	373.762012529676
BW23	0.402359478108525	5.28445208978663	0.231049060186648	0.346573590279973	3.48781611973547	0.597253156409352	0	4.05839001359679	2.91162729734916	4.20162721844146	2.13054873766908	3.95737906285364	3.16762024035607	1.49993655677676	2.69995263691253	0.549306144334055	0	5.1545627662381	1.35122938743774	390.59505582037
BW24	1.86106216237418	5.13694603376538	0.231049060186648	0.173286795139986	2.7024319871392	0.231049060186648	0.693147180559945	2.82210695368083	1.41136883486575	3.41178068037811	1.72331847541428	2.58596873611725	3.51860424619194	0.963457252632055	2.72508870137069	0	0.462098120373297	5.82098927916197	1.89073149583034	373.648484528073
BWd01	2.40594341243338	4.25604783459469	0	1.14108704786696	0	0	1.13373246055405	3.60477447790911	2.28478483408501	4.41587236951167	1.97567720697662	0.366204096222703	3.56677294812432	1.2904003369693	3.93964616470224	0.447939867307014	0	2.27623735721389	1.19763331446239	330.324286843536
BWd02	1.69039319220101	3.84159247222553	0	1.28099099485081	0	0.462098120373297	0.963457252632055	2.41139239324995	1.05935127678265	4.45769647064286	1.36497491166915	0.828302216596	1.9756420086568	0.732408192445407	0.597253156409352	0.575646273248511	0	4.79613902011231	3.98879403964054	307.943748384896
BWd03	3.86280137928995	3.98828838093937	0	0.173286795139986	1.47972346356829	0.366204096222703	0.366204096222703	3.97683891762541	0.963457252632055	4.57993890054397	1.26971812281743	0.828302216596	0.828302216596	0.693147180559945	1.38104490879718	0.173286795139986	0.597253156409352	1.42555537300535	0.968884579429542	262.958290015533
BWd04	0.895879734614027	4.17481019065617	0	0.274653072167027	1.34381960192104	0.231049060186648	0.5364793041447	1.86982393172832	0.231049060186648	3.85016981997021	1.45922436767524	0.231049060186648	0.462098120373297	0.828302216596	0.462098120373297	0.519860385419959	0.231049060186648	0.462098120373297	1.05071456015789	235.238652727215
BWd05	0.519860385419959	4.64096406453061	0.597253156409352	0.274653072167027	0.486477537263828	0.462098120373297	0.462098120373297	2.05792870130065	0.231049060186648	4.11072884410617	1.49675172907872	0.366204096222703	0.366204096222703	1.55132011671917	1.1945063128187	0.833051127543801	0	0.963457252632055	2.45464721254641	286.171214373945
BWd06	0.575646273248511	3.35274115716968	0	0.173286795139986	0	0.767528364331349	0.693147180559945	2.12557564929954	0.462098120373297	3.52833300476418	2.17593717702951	0.366204096222703	0.597253156409352	0.366204096222703	1.13373246055405	0	0.5364793041447	1.8184403717859	0.924841528050325	230.520581036809
BWd07	1.67425856191662	5.08236944217181	0.828302216596	0	0	0.732408192445407	0.767528364331349	3.33983040943081	0.366204096222703	4.25453794156043	2.19305302045936	0.462098120373297	0.597253156409352	0.963457252632055	1.79787584878412	0.575646273248511	0	0.693147180559945	1.1790325207974	276.851038325684
HW01	0.621226662447	4.53985451109012	0	0.967800252726973	1.70059869083108	1.60676052186835	0.231049060186648	5.52782578853112	6.83070592410753	3.59240639549038	1.66547084567255	1.3647815207407	4.77476456575943	0.924196240746594	2.71051023686808	0.173286795139986	0	4.14913918092453	1.94222312822094	345.838333888515
HW02	0.866433975699932	5.10239055963521	0.597253156409352	0	1.71673332111547	1.05935127678265	0	5.32726948820667	6.34268372955863	3.94703669100296	1.42699991173665	3.03388031835095	3.5578652580774	0.597253156409352	3.27264322139149	0.346573590279973	0.597253156409352	3.43937019947635	2.15919470056124	366.15579012455
HW03	0.946047408479565	5.10287314976095	0.828302216596	0.693147180559945	3.73285558592761	0.924196240746594	0	4.68599534585933	5.852506439987	4.19906816887753	2.75507544957398	2.74582642953788	3.77016774548976	1.38629436111989	3.58684590145534	0.519860385419959	0	5.23973376933763	1.95684507209116	442.74389057
HW04	1.41574012003399	5.55057593448174	0.231049060186648	0.173286795139986	1.70717801791042	0	0.767528364331349	5.4066868794431	3.29680077099582	4.10373405937944	1.80094257692986	1.49244560482607	3.86975110286574	0.462098120373297	4.07245620175734	0.447939867307014	0.828302216596	5.39699546085843	2.20792094816059	414.448261696746
HW05	1.14108704786696	4.95951939991169	0	0.173286795139986	3.71570738806121	1.44357778009544	0	6.08759205066845	4.68507757382978	4.10350502088288	1.60864386261696	2.71826252425617	4.67810825037242	1.26888749659011	3.1030934399437	0	0	5.14841712156567	1.27894362512748	392.176024253387
HW06	0.346573590279973	5.03435835465972	0.231049060186648	0.519860385419959	3.26244817114237	0.366204096222703	0.231049060186648	6.06122375109531	5.4346846400744	4.11102693903603	2.40309965980067	2.00129568903551	3.54809379552114	0.462098120373297	3.17660392230579	1.26879345380846	0.462098120373297	5.82787517995249	2.35413128263477	438.943609408219
HW07	0.895879734614027	4.93440560915389	0.231049060186648	0.346573590279973	2.97602219709188	0.828302216596	0.462098120373297	4.38782998851041	5.10119486037715	4.34995243488521	1.41243462603914	2.41187304702225	3.46313176277972	1.09861228866811	2.2364347800861	0.346573590279973	0.231049060186648	4.28262814185099	2.54192230375745	421.163100362877
HW08	0.621226662447	4.85383667702096	1.52144939715595	0.173286795139986	2.29900964681633	0.462098120373297	0	5.32055405583882	6.17960975315984	3.66890773775097	2.33531127840163	2.18748136456457	5.09263204586327	1.09861228866811	1.71193281235009	0.274653072167027	0.231049060186648	4.37882774052167	1.4897874136717	376.034821880404
HW09	0	4.99238621560003	0.231049060186648	0.549306144334055	2.40059561493805	0.597253156409352	0.597253156409352	5.09105752285081	4.63811846420014	4.29549545097971	2.35277813582131	0.998577424517997	2.93462492117814	0	1.14466240149505	0.621226662447	0.231049060186648	3.67752684948594	2.05068305062968	390.229352391947
HW10	0.447939867307014	5.26238007225367	0	0.173286795139986	1.51710639706103	0.462098120373297	0.231049060186648	4.317754278847	4.14176015399691	3.68008117467681	1.62558429161413	4.72689145643297	4.30025953685137	0.231049060186648	1.53170661671153	0.575646273248511	0	3.54847496575517	2.62331326125343	358.305969058646
HW11	0	4.57001977242666	0.462098120373297	0	0.447939867307014	0.597253156409352	0	2.0408309365048	4.54398594786892	4.40020618133635	1.57235615566875	0	2.2674649211081	0	0.597253156409352	0.173286795139986	0.231049060186648	1.56071040904141	0.674071267327871	273.012634401607
HW12	1.26879345380846	4.98390014497335	0.597253156409352	0.519860385419959	3.35617193164825	2.08460960385849	0.693147180559945	5.51080157852035	5.23595600667351	3.94512188018133	2.53260545357176	2.07419208935712	3.67527212260718	0	1.96203467715005	0.346573590279973	0.231049060186648	5.18568958929877	1.62436501766836	451.93029215938
HW13	0.346573590279973	5.09077213376144	0	0.402359478108525	1.56201071862711	0.828302216596	0.963457252632055	4.42773530084039	5.41430436236793	3.57925849856761	2.18486240503415	1.46067554489129	3.94787464083507	0	1.5350567286627	0.346573590279973	0	5.86785487480874	2.18339335739019	378.253495466663
HW14	0.173286795139986	5.02825209305284	0	0.519860385419959	2.93798559136018	0.87968577653842	0	5.37100190640186	4.35129012698634	4.36273652182808	1.88855621605488	4.79536334150956	4.024393682731	0	2.33192205210162	0.346573590279973	0.231049060186648	4.73624704280137	2.23486693978705	401.445066602857
HW15	0.693147180559945	5.20457862141536	0.366204096222703	0.794513457586986	1.19687293569551	1.09861228866811	0.231049060186648	4.71953408867811	5.57844268628411	3.90786601464672	2.43382060732401	2.80792041554123	4.54399075374748	0	2.29923498104288	0.841823957496619	0	2.97368567271914	1.75663737789398	425.357306494873
HW16	0.173286795139986	4.65670294286097	0.231049060186648	1.06916652975401	0.794513457586986	0.366204096222703	0	3.80194708078685	4.18350435060019	4.29888474150889	1.59891259693532	1.13373246055405	2.30524114954377	0.462098120373297	1.2125287199088	0.346573590279973	0.231049060186648	1.52144939715595	0.840872004492879	305.315647461351
LW01	0.346573590279973	5.00752807187582	3.63141206510943	0.173286795139986	0.173286795139986	0	1.08603217934049	1.62760064086212	0.366204096222703	4.65005966481279	2.19388826634559	0.902683400367403	2.67276537950517	1.92691450526411	1.88765349337865	0.346573590279973	0	2.83449995476141	2.76771837419727	364.547335334196
LW02	0	2.50153420918666	0.693147180559945	1.98434367404082	0.173286795139986	0.366204096222703	0.902683400367403	1.3647815207407	0.366204096222703	4.3756961920561	2.17242102335595	0	0.231049060186648	0.693147180559945	0	1.12495241758257	0	0.693147180559945	1.06676729527394	217.985843159106
LW03	2.65322542638999	4.67404892226253	0.462098120373297	1.70390999751858	0.173286795139986	0.462098120373297	0.648636716351771	2.3661252128636	0.693147180559945	3.23687797795261	2.26059104403666	1.15524530093324	3.09908391465516	0.231049060186648	0.732408192445407	0.895879734614027	0	1.4522362755632	1.32136586930421	314.758051792788
LW04	0.722592939474041	4.74435032640127	0	0.549306144334055	0.173286795139986	0	0.231049060186648	3.63644214701729	0.231049060186648	3.94646456896422	1.20142526844253	0.231049060186648	0.828302216596	0.597253156409352	0.231049060186648	0.346573590279973	0	0.963457252632055	0.604872357799609	225.339370764314
LW05	0.549306144334055	3.85171833767363	0	0.274653072167027	0	0	0.732408192445407	1.9887155797079	0.462098120373297	4.05106480691595	1.46517487668735	0.231049060186648	1.1945063128187	1.01484081257447	0.693147180559945	0.173286795139986	0.366204096222703	0.924196240746594	0.906519480118371	228.677425889952
LW06	0.173286795139986	4.71994150210444	0.231049060186648	1.06916652975401	0.173286795139986	0.231049060186648	0.828302216596	1.92691450526411	0.231049060186648	4.26360382627352	1.30795135963458	0.231049060186648	3.73903008192069	1.05935127678265	1.56071040904141	0.722592939474041	0	1.70798799313442	1.13247490861568	272.22975315723
LW07	0.693147180559945	4.09969600897895	0.924196240746594	0.748933068388498	0.346573590279973	0	0.231049060186648	2.36995982102409	2.13341914843627	4.38470646422925	1.51585801520087	0.828302216596	1.18511602049647	1.13373246055405	0.462098120373297	0.346573590279973	0.366204096222703	2.22485379727148	1.38625947962958	300.55282648615
LW08	0.794513457586986	5.04771447694046	0.231049060186648	0.794513457586986	0.519860385419959	0	0.231049060186648	2.25997396915742	2.04374216316105	4.49324365556349	1.79438760000358	0.231049060186648	1.49993655677676	0.231049060186648	0.5364793041447	0.693147180559945	0	1.57283295709836	1.72373152644325	329.47822868018
LW09	1.10770419971083	4.14794884415392	1.66573742458804	1.17053280678105	0.173286795139986	0.231049060186648	0.462098120373297	2.81928924177714	2.47788884672206	3.95482743392892	2.45993358356063	0.231049060186648	3.19648716824825	0.462098120373297	1.26139654463942	0.346573590279973	4.43532802997663	2.47392526454822	2.46754276920819	351.442403610937
LW10	2.54787989093805	3.91352326186346	0	1.84939038388101	0.173286795139986	0	0.902683400367403	3.16886189169615	3.60061956103578	4.24215234337049	1.96733963269353	0.462098120373297	1.56071040904141	1.2904003369693	1.6326132666503	0.346573590279973	0.597253156409352	4.04373094570864	2.09528777398062	330.75802347905
LW11	3.16769054498804	4.11388994447968	0.231049060186648	0.173286795139986	0.621226662447	0	0.231049060186648	2.52002682167394	1.92277366526459	4.68864167442308	2.06092685878211	0.462098120373297	0.924196240746594	0.828302216596	1.11073483672507	0.761130609430856	0.693147180559945	2.32823877337275	2.2863642465795	299.032072360566
LW12	0.447939867307014	5.19008592199844	0	1.73674399803385	0.447939867307014	0	0	4.04577777110933	2.44434100479549	4.25720211473707	1.77227322551567	0.963457252632055	1.3647815207407	3.29720579332188	1.55132011671917	0.346573590279973	0.231049060186648	1.76275567689818	2.88833231666075	367.058688849011
OWW01	1.38629436111989	4.93790221312753	0.597253156409352	0.722592939474041	0	0.462098120373297	0.767528364331349	5.00680517589634	0.693147180559945	4.42250893456436	2.6275218223839	0	2.47551635746577	0.462098120373297	1.43468836440139	0.346573590279973	0	2.54023502894609	2.30894898885879	344.398334034827
OWW02	1.40510021642929	4.41647275594761	0.231049060186648	0.173286795139986	0	0.597253156409352	1.77270666461474	1.84314302917047	0.366204096222703	4.33417535325295	1.38567330513964	0.693147180559945	0.87968577653842	0.767528364331349	2.54670772423179	0.346573590279973	0	3.86233733610764	2.38750430997599	281.049768006673
OWW03	0.794513457586986	4.27054116406902	0.732408192445407	0.519860385419959	0.519860385419959	0.693147180559945	2.18178322011147	2.10931226124307	0.5364793041447	4.36396455037553	1.93747204094061	1.98614156434326	2.98099455532855	0.5364793041447	1.30400766847605	0.722592939474041	0	1.79787584878412	2.41545937548693	323.999583969517
OWW04	1.19687293569551	4.31874805405178	0	0.274653072167027	0.447939867307014	0.231049060186648	0.597253156409352	1.2904003369693	0.231049060186648	3.7176264016037	1.81505802489368	2.12100936784682	2.3633589452587	0.693147180559945	5.32698056826755	0.575646273248511	0	4.99922809313405	1.88663005213285	287.06358703415
OWW05	0.823959216501082	5.30987357009279	1.75937155307684	1.06916652975401	0.575646273248511	0.828302216596	0.231049060186648	1.67898420080454	0.462098120373297	3.93974776660312	2.30523849254225	0.693147180559945	1.63755162857868	0.828302216596	0	0.274653072167027	0	1.69586544507746	2.20313301754002	314.809974478705
OWW06	2.76804636219273	4.908562460833	0.597253156409352	0	0	2.06069496890554	2.4171149944574	3.77266829086659	0.462098120373297	3.11078796334336	1.82398904217664	0.231049060186648	1.31708123952714	0.366204096222703	1.70798799313442	0.402359478108525	0	3.65318007559515	1.50722725637067	281.635229722404
OWW07	2.30635650234856	4.68780028174311	0.366204096222703	0.519860385419959	0	1.63509159281281	2.34830170570979	5.06084854804845	0.597253156409352	3.92682277084469	1.38784620281489	0.231049060186648	1.84839248149319	0.231049060186648	1.42555537300535	0.621226662447	0	1.64721414086977	1.40948693489924	258.862291279138
OWW08	2.48447224481336	5.49129828504933	0.231049060186648	0.621226662447	0.173286795139986	0.231049060186648	1.39655158067548	3.46141521489324	0.597253156409352	3.94962177175632	1.61348127805119	1.3647815207407	2.85020932250083	0.597253156409352	2.1045160154257	0.519860385419959	0	1.656604433192	1.02297798666633	284.672396191291
OWW09	1.74617908002957	4.43060163039922	0.693147180559945	1.80085138027077	0	0.462098120373297	0.366204096222703	0.693147180559945	0.231049060186648	4.32183117814886	2.50986489254017	1.04516473864305	4.32543528647147	0	2.67669469808919	0.274653072167027	0.597253156409352	3.89917591741777	2.21034261545144	326.225485602044
OWW10	0.794513457586986	3.66207876837194	0	0.173286795139986	0	0	0	2.68726742484612	0.231049060186648	4.72831468852581	1.55532437322617	1.37029128805777	0.767528364331349	0	1.1945063128187	0.621226662447	0.231049060186648	2.13230988507205	0.476029215739315	225.712078110761
OWW11	1.28099099485081	4.71852526964062	0.597253156409352	0.173286795139986	0.346573590279973	0.231049060186648	0.648636716351771	1.22962648470465	0.693147180559945	4.04313869049016	1.90330025584262	0	2.3506185409853	0	2.70055924915152	0.173286795139986	0.462098120373297	3.16507283903174	1.9863938479255	273.565276113962
OWW12	3.26280275826906	2.86331635246013	2.20934712539318	1.14108704786696	0.274653072167027	1.93903705332107	2.7320537130943	0.366204096222703	0	3.95682557616889	1.75917936104344	0.366204096222703	0.462098120373297	0	2.12557564929954	0	0	0.5364793041447	2.47125819451166	296.275362203046
OWW13	2.15980845433132	3.54752204415768	0.597253156409352	1.12495241758257	0	0.462098120373297	0.828302216596	0.963457252632055	0.693147180559945	3.98928389785696	1.81523203688633	0	2.49516386934358	0	0.998577424517997	0	0	1.94101529849434	1.1910155899375	251.84538992982
OWW14	0.346573590279973	3.87754514887408	0	0.447939867307014	0	0	0.462098120373297	0.366204096222703	0.231049060186648	1.411193650689	1.33697046014278	0	0.693147180559945	0	0.231049060186648	0.677012550275553	0	0.648636716351771	1.00250087756304	153.73832944767
OWW15	0.693147180559945	4.79472374015994	0.963457252632055	0.173286795139986	0	0	0.924196240746594	1.63509159281281	1.01484081257447	3.63493689168326	1.78698972774706	0	0.597253156409352	0	0.732408192445407	0.274653072167027	0.366204096222703	0.597253156409352	1.63887192435	255.436684285662
OWW16	1.17962471782377	3.71240035527199	0.828302216596	0.402359478108525	0	0.366204096222703	0	1.57283295709836	3.27535546852251	4.1148776871683	2.81003067287495	0	0.231049060186648	0	0.828302216596	0.895879734614027	0.732408192445407	4.9415977160157	3.58416558946685	322.372252832539
PH01	0.447939867307014	3.56516641779631	0	0.173286795139986	0.173286795139986	0.828302216596	0.828302216596	1.70198182463353	1.24588987276112	4.44545773489258	1.96339877320362	0.231049060186648	0.5364793041447	0	0.998577424517997	0.794513457586986	0.231049060186648	1.5350567286627	1.62382042211316	290.312983152464
PH02	0.895879734614027	4.58569149033847	0.5364793041447	0.693147180559945	0.173286795139986	0	1.11073483672507	1.05935127678265	0.732408192445407	4.46934196158816	1.8196022716209	0	0.902683400367403	0	0.963457252632055	1.31437384300695	0.231049060186648	0.828302216596	3.66109513995274	309.733335187288
PH03	0.519860385419959	3.87688068863306	0.231049060186648	1.06916652975401	0	0.87968577653842	0.732408192445407	1.59583058092735	0.767528364331349	3.98031222977178	2.97127138476593	0	3.10155001714897	0	0.648636716351771	1.47152600786254	0.462098120373297	2.41970537603237	2.09601945821667	334.298233839438
PH04	2.43743836314852	3.56553262337478	0	1.60903759209236	0.519860385419959	0.231049060186648	1.54813029971379	3.31343384188628	2.45841859266992	4.22863355181604	1.96108936291495	0.597253156409352	1.13373246055405	0	1.42555537300535	0.346573590279973	0.231049060186648	3.46197123392681	2.94362418465688	308.796433714097
PH05	2.75612835901028	3.47956307901857	0.231049060186648	0.447939867307014	0	0.462098120373297	0.693147180559945	0.767528364331349	1.4391627045121	4.30277335339255	1.85239612364544	0.597253156409352	0.767528364331349	0	1.16550252048883	0	0.231049060186648	2.21329194460885	2.41037376418753	280.825192995142
PH06	0.519860385419959	4.93854388041567	0.924196240746594	1.83325575359662	0	0.828302216596	1.09861228866811	3.49523439079626	1.30400766847605	4.21053391627578	2.42287576105725	0.462098120373297	0.462098120373297	0	1.87826320105642	0.274653072167027	0.87968577653842	1.46067554489129	2.67724886084354	320.563903928726
PH07	0.895879734614027	4.252293770403	1.71776386483259	2.31007186208603	0	0.998577424517997	1.03034748445277	1.79175946922806	2.38694863555477	3.00869742633557	5.63049441638885	0.828302216596	1.62251148348519	0.231049060186648	2.50728641740054	3.25228299184148	0.693147180559945	2.70176917183505	2.56236951834649	497.726305622266
PH08	0.659764332403815	2.46491430752746	0.462098120373297	1.06916652975401	0.447939867307014	0.366204096222703	1.26888749659011	0.767528364331349	0.597253156409352	2.16179921668047	3.06696505158446	0	0.597253156409352	0	0.828302216596	0.599473818199593	0.231049060186648	2.03493107747166	4.26081065257618	240.851588616929
PH09	0.274653072167027	1.29682857094104	0.648636716351771	0.173286795139986	0.173286795139986	0.597253156409352	0	1.22962648470465	0.998577424517997	1.05902511850589	2.45434933317243	0.231049060186648	0.828302216596	1.01484081257447	1.13373246055405	0.346573590279973	0	1.22962648470465	3.00532376023015	189.952938792595
PH10	0	1.64735639120639	0.366204096222703	1.03578368159788	0.447939867307014	0	0	1.05935127678265	0	1.10511331745499	2.0564343248356	0.231049060186648	0.597253156409352	1.26888749659011	0.693147180559945	1.55564406701784	0	1.64721414086977	2.89040002504754	193.242118129223
PH11	0	3.80259283998811	1.43468836440139	2.18802679958234	0.173286795139986	2.34095602869421	0.231049060186648	1.34178389691172	0.597253156409352	1.05569134062141	5.43877898085999	0.231049060186648	1.11073483672507	0.732408192445407	3.15046747459758	3.93499147605105	0	4.3777282053453	1.95194134156076	459.461867545168
PH12	0.173286795139986	1.88544926223222	0.231049060186648	1.60903759209236	0.173286795139986	0.231049060186648	0	0.366204096222703	0.231049060186648	1.28958253518194	1.58637637394713	0.231049060186648	0.462098120373297	1.3647815207407	0.231049060186648	1.47152600786254	0	1.05935127678265	2.54516095553689	175.794890462242
PH13	0.173286795139986	3.78182144018313	0	1.71673332111547	0.173286795139986	2.02048563964267	0.231049060186648	1.75937155307684	1.1945063128187	1.8808760826493	4.39539314126634	0	0.462098120373297	1.13373246055405	0.828302216596	0.934417404570842	0	1.30400766847605	2.12863433331076	343.214172420056
PH14	0.173286795139986	3.49275326272952	0	1.03178359626127	0.173286795139986	0.854983119153846	0	2.07419208935712	1.96203467715005	1.33346318659919	5.45475575707519	0.767528364331349	0.597253156409352	1.76610578884935	0.597253156409352	2.53190765104586	0	3.18690517125546	2.93820943744416	374.264105098251
PH15	0	1.64745455881555	1.46067554489129	0.621226662447	0	0.597253156409352	0	0.462098120373297	0.799298424266124	1.1610064044744	3.29069444317383	0.597253156409352	0	0	1.53170661671153	0.850299345415539	1.68114170563975	1.05935127678265	2.7760610142284	234.687118947192
PH16	0.173286795139986	2.70477200936308	0.87968577653842	0.346573590279973	0.173286795139986	3.96609663379046	0	0.767528364331349	0.231049060186648	1.11981802056679	4.73246882718288	0.231049060186648	0.231049060186648	0	0	1.3701597308355	1.79938756717258	4.55439318495133	1.31870385794065	393.358237236993
PH17	0.549306144334055	2.22545687135152	2.4816110912974	2.43228354134784	0	0.597253156409352	0.231049060186648	0.462098120373297	0.693147180559945	0.931197588512057	3.9941548703749	0.231049060186648	0	0	1.8296459087189	3.09123021153462	0.767528364331349	2.99606544033169	2.74599358648855	376.370446228539
PH18	0.447939867307014	1.98731200238202	2.82462268889262	1.74825378073324	0.173286795139986	0.231049060186648	0.693147180559945	0.462098120373297	0	1.23733192034399	3.09901432991386	0.231049060186648	1.1945063128187	0	2.45590285745812	2.24990483516513	1.49993655677676	2.52279308927884	3.66946543931726	302.730332220505
PH19	0.173286795139986	1.58722428811415	0.597253156409352	0.173286795139986	0.173286795139986	0	0.231049060186648	0.693147180559945	0.231049060186648	1.12502097647852	2.32457770053391	0.231049060186648	1.24588987276112	0	1.1945063128187	1.7104038691194	3.50532227667621	1.42555537300535	2.56694417051679	202.144715075752
PH20	0.173286795139986	1.35970795392888	0.597253156409352	0	0.519860385419959	0	0.963457252632055	0.462098120373297	0	1.10859030440261	1.79167857310751	0.231049060186648	0.693147180559945	0	0.902683400367403	0.922219863528484	0.597253156409352	0.924196240746594	2.75686436401901	157.865412229106
PH21	0.621226662447	3.74212817111261	3.09104245335832	2.73778057160984	0.173286795139986	1.67462684028209	0.231049060186648	2.02511534369623	1.85864970104877	2.76071346383971	5.24729932316798	0.231049060186648	0.767528364331349	0	1.05935127678265	3.74621055671126	4.80220206221558	3.17573094057591	2.11784675254684	507.690030094559
PH22	0.402359478108525	1.66456683248808	1.16550252048883	0	0.346573590279973	0.366204096222703	0.902683400367403	0.693147180559945	0	1.28180194547167	2.80721634172429	0	0.597253156409352	0	1.59583058092735	1.22631869460961	3.43618419354098	1.96203467715005	3.04732324934347	253.338361545932
PH24	0.814524134505371	1.85725370133166	1.13373246055405	1.6935559715894	0	0	0.693147180559945	1.32966134885476	0	1.0797781482854	3.05316966827065	0	0.597253156409352	0	0.462098120373297	1.67115293191698	0.462098120373297	2.3633589452587	2.63590739185824	248.297152174932
SAC02	0.519860385419959	2.24254696094478	0	0.946047408479565	0	0.799298424266124	0.462098120373297	2.04662818407542	0	1.85083279961563	2.08696361962715	0.231049060186648	0.231049060186648	0.5364793041447	0.462098120373297	0.346573590279973	0	1.93303088482018	4.55753880545293	215.764431840233
SAC03	0.346573590279973	3.35364315830565	0	3.49041302682587	0.173286795139986	1.01484081257447	0.366204096222703	2.50219726002361	1.79175946922806	2.32854145106336	4.74956712406077	0.231049060186648	0.87968577653842	1.8184403717859	1.05935127678265	0.173286795139986	0	0.462098120373297	2.54489597663227	419.448110922548
SAC04	0.447939867307014	3.42506461766445	1.8083166724938	0.693147180559945	0.346573590279973	0.924196240746594	0.462098120373297	1.826879641114	0.462098120373297	2.26856471512844	3.70512519726356	2.22146967345014	1.49244560482607	2.55743081854292	1.13373246055405	0	0	4.04704468145709	2.07484299541956	381.257353825533
SAC05	1.25923815060341	3.45543996872901	0.828302216596	3.89120542773187	0	0.693147180559945	0.231049060186648	1.54165760442809	0	2.26422899521608	4.83466317838153	0.231049060186648	1.92277366526459	0.924196240746594	2.35888460514798	1.24930306844103	0	3.80497923454727	2.15612543593525	388.816083048555
SAC06	0.346573590279973	2.25960627522594	1.05935127678265	0	0	0	0.366204096222703	1.61209396898383	0.462098120373297	1.3483793338243	2.39418548977768	0.231049060186648	0.462098120373297	1.1945063128187	0.732408192445407	0	0	0.828302216596	2.89548314473882	181.564903523803
SAC07	0.173286795139986	2.69752011750897	0.462098120373297	2.05048358779856	0.173286795139986	0.231049060186648	0.366204096222703	1.34178389691172	0	1.30980548703456	1.34780256391204	0	0.231049060186648	0	0.828302216596	0.922219863528484	0	0.924196240746594	2.9702013844362	173.486069601199
SAC08	0.722592939474041	4.42782580504313	0.231049060186648	2.20763575265415	0	0.231049060186648	2.59259754211294	2.09718971318611	0.231049060186648	1.97714970444265	3.02597484313843	0.231049060186648	0.828302216596	0.597253156409352	1.46067554489129	1.09550665866847	1.58739131159925	0.597253156409352	1.07268388151918	289.635383940955
SAC09	0.447939867307014	4.01282742548275	0.597253156409352	1.96677637507918	0.519860385419959	0.648636716351771	0.462098120373297	3.27264322139149	3.62475548989812	1.87639113947293	2.852638014471	0.998577424517997	2.27114819983697	0.366204096222703	1.47693893294777	0	0.231049060186648	2.37482608749781	2.59459717679271	351.040909098841
SAC10	1.17053280678105	2.55925604039947	1.1945063128187	3.09515350375129	1.59923241380404	0.732408192445407	0.231049060186648	2.30524114954377	1.64721414086977	1.35337525001654	1.28052941677573	1.09861228866811	1.87826320105642	1.05935127678265	1.09861228866811	1.06212381051234	0.963457252632055	1.9887155797079	5.21177778948713	288.859685725537
SAC11	0.447939867307014	4.0935170748503	0.854983119153846	0.677012550275553	0.850299345415539	4.0934390123166	0.231049060186648	2.22485379727148	2.29720863235075	2.21531217446743	4.47670632474319	0.963457252632055	1.11073483672507	0.924196240746594	1.2904003369693	0	3.52301932177528	1.13373246055405	2.96363568783008	438.377848047252
SAC12	0.274653072167027	2.39898657514733	0.231049060186648	0.888837015372353	0.794513457586986	0.462098120373297	0	1.76610578884935	1.77270666461474	1.56942612678134	1.9055336905596	0.366204096222703	1.13373246055405	0.924196240746594	1.05935127678265	0.173286795139986	0	1.69172460507794	3.41970686045589	276.767746645353
SAC13	1.06916652975401	2.86243840690396	1.47693893294777	1.04359681747391	1.49153668478092	0.462098120373297	0	2.15899078762989	1.96203467715005	1.53619557789301	1.80084429543145	0.597253156409352	1.41616508068312	0.693147180559945	1.13373246055405	0.173286795139986	2.11345310124258	1.95264438482782	3.48407724955839	292.39851022763
SAC14	1.54344652597548	3.48530941979929	1.9012608248854	4.51002860069826	1.38036522946556	0.231049060186648	0.366204096222703	3.18887174529786	1.75249845734259	1.57036729399957	3.30867493616447	0.366204096222703	1.15524530093324	0.693147180559945	1.26888749659011	0.402359478108525	0.231049060186648	3.40585603294748	2.18404632858051	356.537013172807
SAC15	0.722592939474041	2.45208478823807	0.462098120373297	0.823959216501082	1.41574012003399	0.231049060186648	0	2.05792870130065	1.9012608248854	1.42189543684412	1.66951669955552	0.828302216596	1.32966134885476	0.963457252632055	0.693147180559945	0	0.231049060186648	2.38901262563741	3.53349317599017	246.509769945984
SAC16	1.57473731171399	3.27577397661071	0.231049060186648	3.05975593641746	0.748933068388498	0.693147180559945	0.231049060186648	2.21546350494924	1.94298187253674	1.48343187156316	2.94847457749341	0.366204096222703	1.3647815207407	1.1945063128187	2.93662093512635	0	0.231049060186648	1.2904003369693	2.98477640711357	315.29487698687
SNG01	0.274653072167027	3.74568493950611	1.32966134885476	3.82792926508999	0	0.87968577653842	0	1.13373246055405	0.597253156409352	3.36980419006932	3.78478504992624	0	0.693147180559945	0	0	0	0.231049060186648	3.31262965975115	0.526982779159134	287.845802929103
SNG02	0.346573590279973	2.79771946772394	5.01188430913758	1.4308962754881	0.708303336014054	0.597253156409352	0.462098120373297	0.693147180559945	0.231049060186648	1.74818264466742	3.02921219851443	0	0.767528364331349	0	0	1.16349008753938	0	3.8104524759688	1.61732579724506	437.122926811969
SP10	0.173286795139986	4.32442776596582	0.648636716351771	0.794513457586986	0	0	0.231049060186648	0.924196240746594	1.32966134885476	2.27241042537666	1.21131741825572	0.231049060186648	0.462098120373297	0.828302216596	0	0.693147180559945	0.231049060186648	1.0729586082894	0.59634103855652	213.631843275471
SP11	0	5.07199946611742	0.693147180559945	0.722592939474041	0	0.231049060186648	0	1.47693893294777	0.963457252632055	2.41916601679452	1.38224544289678	1.44793514061789	0.462098120373297	3.39559500889003	0.231049060186648	0.346573590279973	0.231049060186648	1.05935127678265	1.79371786338687	272.778352025164
SP12	0.274653072167027	4.05934836737132	0.462098120373297	0.794513457586986	0.173286795139986	0	0.693147180559945	2.00129568903551	1.26888749659011	2.15423968999275	1.37801918116709	0	0.828302216596	2.61067139350182	0.693147180559945	0.447939867307014	0	0.828302216596	0.584906366031729	236.045958951039
SP13	0.173286795139986	4.1390803551389	0	0.621226662447	0.173286795139986	0.366204096222703	0	0.597253156409352	1.2904003369693	4.14614732447302	1.23360960225189	0	0.231049060186648	2.01341823709247	0.828302216596	0.173286795139986	0	0.366204096222703	2.11878597399201	252.066646325724
SP14	0.173286795139986	4.03056360775802	0.648636716351771	0.346573590279973	0.274653072167027	0.231049060186648	0.231049060186648	0.648636716351771	1.05935127678265	1.32660859920899	1.24402042724101	0.693147180559945	0.767528364331349	2.84172045368847	0.963457252632055	0.173286795139986	1.32966134885476	1.05935127678265	0.932565416803221	239.223433001592
SP15	0.173286795139986	4.25668033771107	0.231049060186648	0.173286795139986	0.173286795139986	0.231049060186648	0.231049060186648	1.15524530093324	0.597253156409352	3.85856244446186	1.90850470639409	0	0.924196240746594	0.366204096222703	0.462098120373297	0.447939867307014	0.231049060186648	0.462098120373297	1.92945075854729	239.618818700871
SP16	0.274653072167027	2.5030708959619	0.231049060186648	0.173286795139986	0	2.24287620436157	0.231049060186648	2.1187025535653	0.597253156409352	1.98282308211935	1.92044565869176	0	0.963457252632055	1.1945063128187	0.732408192445407	0.519860385419959	0	3.07553578148002	1.20646677883495	258.409475028313
SP17	0	4.29716194185135	0.231049060186648	0.659764332403815	0.274653072167027	0.462098120373297	0	0.963457252632055	1.15524530093324	1.95045953506165	1.52901281900609	0	0.462098120373297	0	0.231049060186648	0.519860385419959	0	1.22962648470465	0.610952302716579	210.560637759293
WEL01	0.447939867307014	2.39412319989657	1.13373246055405	1.34381960192104	0.88159013115404	0.462098120373297	0.924196240746594	1.95264438482782	1.15524530093324	1.68836810390407	2.90063407735613	0.828302216596	0.963457252632055	0.828302216596	1.09861228866811	1.09550665866847	0.693147180559945	2.8170177963039	3.16106676901248	463.078175552973
WEL02	2.15130101718474	2.82270760250649	4.91105611832631	2.19101331733694	0.447939867307014	0.462098120373297	0.828302216596	2.42781607625221	1.2762137988297	1.6679137007179	3.93165992531984	0.902683400367403	1.66347752892625	0.693147180559945	0.366204096222703	2.50562856473944	4.81315256757436	2.67539006498214	3.36499398520512	524.547520125635
WEL03	0.722592939474041	3.31924805382934	0.693147180559945	2.11276334722792	0.173286795139986	0.231049060186648	0.366204096222703	2.22019171661323	1.1945063128187	1.77466468531222	3.75698978917965	0.732408192445407	1.38104490879718	0.828302216596	0.828302216596	0.794513457586986	0.462098120373297	2.1930837373367	4.14387151451623	365.733941618609
WEL04	1.02358614055553	4.35294594880359	0.231049060186648	1.94580600408401	0	3.61649747146456	1.03034748445277	2.17598597254085	1.69586544507746	2.30692451711641	5.49828469059138	0.462098120373297	1.39655158067548	0.693147180559945	4.3873113431073	4.10519160735412	0	3.57247847774726	1.38699020829626	485.496505179413
WEL05	0.895879734614027	4.37138058225625	0.462098120373297	5.03075910233646	0	2.2674649211081	0.462098120373297	3.23403516433448	1.42555537300535	1.82292288065556	5.58870219460929	0.828302216596	1.42555537300535	0.231049060186648	1.69172460507794	2.60702443281818	0	2.62006168582406	1.16398101856056	496.208004807059
WEL06	2.01331278838727	4.37610233345601	0.366204096222703	2.43996202558363	0.274653072167027	0.366204096222703	0.597253156409352	2.21459657771589	2.21329194460885	2.52994871978587	5.56448002423718	0.231049060186648	1.4522362755632	0.597253156409352	1.75937155307684	2.99156650832986	2.89225258702919	3.33822369383225	2.35334301965976	510.547302465177
WEL07	0.693147180559945	4.43954968491606	0.462098120373297	5.11906124452258	0.173286795139986	2.39361039968152	0.597253156409352	1.98354751752924	2.4719256584718	1.82231801887628	5.16778127672109	0	2.20041003957629	3.21876914113123	1.46067554489129	3.88383607190519	0.462098120373297	3.51101858381773	2.35800922712139	503.07920080484
WEL08	0.659764332403815	2.66369449882965	1.22962648470465	1.58728474784495	0.346573590279973	1.84314302917047	0.87968577653842	2.01341823709247	1.42555537300535	1.77835190659569	3.95156385409717	0.231049060186648	1.41616508068312	0.828302216596	1.8184403717859	2.62081051143525	0.462098120373297	3.31653582938323	3.31521562350186	370.295631011275
WEL09	0.173286795139986	2.86994421570294	0	1.98876856831567	0	1.09861228866811	0	1.2904003369693	0.231049060186648	3.03744562791182	4.66137026495663	0.231049060186648	3.33953345321221	1.22118721537655	0	3.56596855576093	0.5364793041447	3.9602249533924	2.12972350457835	488.854908711228
WEL10	0	2.95175325660874	1.12243194332882	1.48960617325745	0	0.998577424517997	0.231049060186648	1.738311919203	1.47693893294777	2.2584508392466	4.56399869056275	0.366204096222703	0.462098120373297	1.34178389691172	0.231049060186648	2.85663211116985	0.944404448018739	3.88005235181541	2.54084989331375	423.041697205886
WEL11	0	2.12564246042869	0	1.49153668478092	0	0.597253156409352	0.231049060186648	0.462098120373297	0.366204096222703	0.943826746689324	3.59378045266455	0	1.56071040904141	0	0.231049060186648	1.93625070087896	0	2.42413279752335	2.65739307412067	253.639190467782
WEL12	0	1.1790325207974	0	0.575646273248511	0	1.2904003369693	0	0.767528364331349	0	1.17827763975266	1.73407004400085	0	0.462098120373297	0.767528364331349	0	0.794513457586986	0	0.828302216596	2.8592632891043	158.801290203319
WEL13	0.346573590279973	2.03268503460217	0	1.64481280300253	0.173286795139986	1.46067554489129	0.231049060186648	0.693147180559945	0.366204096222703	1.32313353844242	3.70755742187806	0.231049060186648	0.231049060186648	0	0	1.82830509677258	0.799298424266124	1.9012608248854	2.7060281488959	282.482552722733
WEL14	0.621226662447	2.29053469961639	1.1945063128187	2.79126716737059	0	1.56071040904141	0.5364793041447	1.64721414086977	2.21976463989455	1.36026110283633	4.88281945823569	0	0.366204096222703	0	1.3647815207407	4.09289505569336	0.854983119153846	4.02873581455649	2.19620998509851	511.679612658421
WEL15	0.173286795139986	1.85042190833609	0	1.59290296180796	0	0.366204096222703	0.231049060186648	0.902683400367403	0.998577424517997	0.956672636674929	2.95549775697906	0	0	0	0	1.42594561866405	0	0.963457252632055	2.52864687382317	197.360684499098
WEL16	0	2.6801900677557	0	0.173286795139986	0	0.462098120373297	0	0.597253156409352	0.231049060186648	1.87429190072769	4.81480246827319	0.231049060186648	0.366204096222703	0	2.9327175727024	1.38629436111989	1.09861228866811	2.94902410418927	1.38002018484349	314.507433617782
WEL17	0.621226662447	3.18335676748971	1.69586544507746	4.03855216389211	0	0.231049060186648	0.231049060186648	0.462098120373297	1.15524530093324	1.7579492739917	3.35609536467953	0	0.231049060186648	0	0.231049060186648	1.60903759209236	0	0.732408192445407	1.68410533783593	369.213129153778
WEL18	0.173286795139986	2.10187562068092	0	1.41747023074513	0.173286795139986	0.597253156409352	0.231049060186648	0	1.56071040904141	1.04851251139531	3.15770167545022	0	0.366204096222703	0.732408192445407	0.998577424517997	0.934417404570842	1.7490080240535	0.462098120373297	2.86728716317888	253.052651030514
WEL19	0	2.72373259104611	0.597253156409352	2.00159189191256	0	0.231049060186648	0.597253156409352	0.231049060186648	0.231049060186648	0.971539941464331	4.1909810794849	0.231049060186648	1.01484081257447	0	0.231049060186648	2.00358393432486	0.828302216596	2.57555122161588	1.65899311129105	315.083756700926
WEL20	0.346573590279973	2.34705632705671	3.88883485096618	1.51710639706103	0.346573590279973	0.231049060186648	0.231049060186648	0.732408192445407	1.05935127678265	1.02150480838301	3.30885900456321	0.231049060186648	0.231049060186648	0	0	2.17687072946484	3.33558863399654	1.0729586082894	2.96198168491623	317.661709622524
WEL22	0	2.52825824130197	0	2.2032108583793	0	0.462098120373297	0.693147180559945	1.5350567286627	1.64721414086977	2.71398377450166	2.31231807904971	0	0.998577424517997	0	1.67898420080454	0.575646273248511	0	1.33577772841082	2.69759359639814	254.017329016151
WEL23	0.173286795139986	3.38269816260332	0	4.52351747093324	0.173286795139986	0.366204096222703	0.231049060186648	0.693147180559945	1.5350567286627	1.97450937127321	4.48112346349722	0	1.2904003369693	0.87968577653842	0.231049060186648	2.10095012601529	2.14698218021097	3.63748287308386	2.65275941404831	407.741008499932
WEL24	0.722592939474041	3.49440498040329	0	4.84792674475246	0	1.7309856169634	0.231049060186648	1.5350567286627	1.656604433192	2.23155938024686	5.31729531150539	0	1.64721414086977	0	0.597253156409352	2.77742446295056	1.5350567286627	3.78142336631336	2.07103469081556	510.836601772507
WEL25	0.621226662447	2.07639883897101	0.693147180559945	1.242453324894	0.621226662447	0.828302216596	0.597253156409352	2.1930837373367	0.963457252632055	1.3668656570327	2.71220825361511	0.462098120373297	0.732408192445407	1.05935127678265	0.366204096222703	1.92518694862795	0.462098120373297	1.46481638489081	3.70778006678306	258.092226891132
WEL26	0.895879734614027	2.85542826032378	1.08603217934049	1.4341430743698	0.519860385419959	1.17545350820539	2.66023594028989	1.05935127678265	1.22962648470465	1.95494361217359	4.27606697274643	0.366204096222703	0.597253156409352	1.4391627045121	0.231049060186648	3.10367990687292	0.462098120373297	2.09718971318611	1.61266697062408	385.74980187238
WF01	3.23148491269738	4.88255699462902	0.828302216596	0.274653072167027	0.447939867307014	0.462098120373297	1.24588987276112	3.84027472925453	0.366204096222703	4.60653683168088	2.00615355288904	1.58453006370212	4.42861394879893	0.231049060186648	3.5494259887493	0.575646273248511	0	1.88765349337865	0.941471578313812	350.701928694712
WF02	0.173286795139986	3.59746869835555	0	0.173286795139986	0	2.46339380940881	0.597253156409352	1.3647815207407	0.231049060186648	4.60941956528667	1.56653564200752	0.366204096222703	0.462098120373297	0	0.828302216596	0.173286795139986	0	1.05935127678265	1.42735691855126	219.088018726044
WF04	2.20938401152689	5.22313689674459	0.462098120373297	0.346573590279973	0.173286795139986	0	0.5364793041447	3.33774613883175	0.828302216596	4.44600443437545	2.41149477011593	0.828302216596	0.998577424517997	1.13373246055405	3.30216102050531	0.173286795139986	0	1.75937155307684	1.82066700946307	325.312784285793
WF05	0.519860385419959	5.30512864237437	0.366204096222703	0.274653072167027	0.346573590279973	0.597253156409352	0.693147180559945	1.656604433192	0.366204096222703	4.40034859442334	1.56944865469157	1.3647815207407	2.84566527290414	1.61734342130654	3.5873548074066	0	0.231049060186648	2.17008611350772	2.90857331246505	330.200840390913
WF06	1.06916652975401	4.78502549364653	0.462098120373297	0.274653072167027	0.173286795139986	0.693147180559945	0.231049060186648	3.6034849856498	0	4.98790613518742	1.91393333440095	1.17545350820539	2.31884848105052	0.767528364331349	3.80984795201039	0	0.231049060186648	3.23174420457189	2.14020642712808	308.350161892695
WF07	1.36383027883943	4.68337456386067	1.3647815207407	0.447939867307014	2.13306970720857	0.828302216596	1.1945063128187	2.42689906512825	0.767528364331349	4.37872973337434	3.14103160205069	0.366204096222703	2.2805384921592	0.462098120373297	0.231049060186648	0.402359478108525	0	1.69172460507794	1.24975784462566	362.57040128779
WGP01	1.17053280678105	4.02778516059644	0.924196240746594	0.346573590279973	0	0.828302216596	4.95006049349853	1.41616508068312	0.231049060186648	1.534037183857	1.50622359771167	0.231049060186648	0.597253156409352	0.231049060186648	1.22962648470465	0.447939867307014	0	0.462098120373297	1.19899851256528	219.819680884889
WGP02	3.66724731935664	2.65667112900311	3.36613207494518	0.722592939474041	0	0.231049060186648	0.963457252632055	1.05935127678265	0.231049060186648	3.75438262165347	1.85830392222585	0.597253156409352	4.36332895638503	0.693147180559945	5.05151851409733	1.3701597308355	0	3.3330537675348	1.54682092200849	306.284244141145
WGP03	0.447939867307014	2.10259156873853	0.924196240746594	0.693147180559945	0	0	3.94817624149331	1.49993655677676	0.462098120373297	1.78924562097674	1.75844260159911	0.231049060186648	0.998577424517997	0.693147180559945	0.462098120373297	0.346573590279973	0	0.828302216596	3.7023084988914	213.800793236401
WGP04	0.722592939474041	4.1497905373787	0	0.173286795139986	0.173286795139986	0.462098120373297	0.366204096222703	1.69172460507794	0	1.7054519174135	0.899136984685216	0.462098120373297	0.462098120373297	0.462098120373297	0.693147180559945	0.173286795139986	0	1.2904003369693	2.94172810374591	175.869946583515
WGP05	1.8232544199432	3.0828239194465	0.87968577653842	0.173286795139986	0.173286795139986	0.597253156409352	1.17545350820539	1.57283295709836	1.03034748445277	1.42964026981572	2.67901698087794	0.366204096222703	0.597253156409352	0.462098120373297	0.366204096222703	0.173286795139986	0	1.90567590046874	1.40670245729253	273.650420710289
WGP06	1.07937202838408	1.48436902681027	3.72246275514732	1.42089494183467	0.274653072167027	0	6.30671309551608	1.1945063128187	0.924196240746594	1.08245217449802	2.19137638612207	0.366204096222703	0.693147180559945	0.597253156409352	3.80122282634443	1.48766063814693	0	1.67021176469875	0.840872004492879	302.739889075093
WGP07	1.3701597308355	1.66799462124211	3.33049947661961	0.895879734614028	0.274653072167027	0	6.27299068056815	1.42555537300535	0.231049060186648	1.23442938993965	1.53390786029685	0.462098120373297	0	0.597253156409352	1.1945063128187	0.997246011641069	0.462098120373297	1.22962648470465	1.90353183256211	216.352688015303
WGP08	0.519860385419959	4.2071252812311	0	1.06916652975401	0	0.462098120373297	1.59583058092735	1.3647815207407	0.462098120373297	1.4002339460581	2.14095421444784	0.231049060186648	0.462098120373297	0.462098120373297	0	1.19687293569551	0	0.693147180559945	2.34249728579903	196.767799853699
WGP09	1.17962471782377	2.62398170682522	0.231049060186648	0.794513457586986	1.67425856191662	1.87826320105642	2.31565866404514	2.49102302934407	2.44651256513589	1.57673785423591	2.79674940722332	0.963457252632055	1.44793514061789	0.87968577653842	0.828302216596	1.71673332111547	0.87968577653842	2.74582642953788	4.50313949280018	337.101294639599
WGP10	1.19687293569551	1.82754452788317	1.2904003369693	0.794513457586986	0.895879734614027	0.366204096222703	2.1620535963147	2.01341823709247	1.89452658911289	1.58916093398958	1.08362529966141	0.462098120373297	0.693147180559945	0.462098120373297	0.998577424517997	0.693147180559945	2.45841859266992	1.59583058092735	6.06039969178261	261.33972801446
WGP11	3.79632835722952	1.46410860742369	0	0.519860385419959	0.794513457586986	0	0.231049060186648	1.91752421294188	1.96571795587891	1.38216809283331	0.955420883116842	0.597253156409352	1.1945063128187	0.998577424517997	1.08603217934049	0.677012550275553	0	1.56071040904141	5.21990920048044	243.077275945665
WGP12	1.35733640723861	2.70760824750261	0.231049060186648	0.447939867307014	0.95166562244258	0	0	1.99380473708483	1.69586544507746	2.47852397707348	0.685079865417749	0.693147180559945	0.693147180559945	0.767528364331349	1.1945063128187	0.486477537263828	0.231049060186648	1.46067554489129	3.66561371407503	233.059235216601
WGP13	0.173286795139986	4.52248109515655	3.22980920665165	0.833051127543801	0.519860385419959	0	0.998577424517997	2.57141038161636	2.4707201116484	1.70241214847954	1.15965000743169	0.693147180559945	1.3647815207407	0.998577424517997	1.26139654463942	0	0.597253156409352	1.85864970104877	1.45444561273349	290.175002185388
WGP14	0.173286795139986	5.31365632849625	0.462098120373297	0.621226662447	0.173286795139986	0.231049060186648	0.366204096222703	1.85356054367184	1.95073415992482	4.29660835240843	1.14685035664132	1.44357778009544	0.462098120373297	0.597253156409352	1.09861228866811	0.346573590279973	0.231049060186648	1.86614065299946	2.87343576371477	279.737096095343
WGP15	0.967800252726973	2.89259790505292	0	0.722592939474041	1.09550665866847	0.462098120373297	1.04516473864305	2.54989754123717	2.71595570997465	3.30099331550251	2.36553365409873	1.26888749659011	2.47432375034981	0.87968577653842	0.693147180559945	1.44977316361513	0	3.22594695700127	1.21957083124463	310.813242815504
WGP16	1.61847267408807	3.31006416447645	1.04516473864305	1.81809959814251	0.173286795139986	0.231049060186648	0	2.34975161375195	2.40113517369437	4.52721891104815	2.24068565264109	0.462098120373297	0.366204096222703	0.998577424517997	0.5364793041447	1.3010016717692	0.462098120373297	2.60318044155114	1.49586735858868	342.218353379364
WGP17	0.173286795139986	3.95194156442672	0	0.346573590279973	1.29823921272255	0.231049060186648	1.01484081257447	1.49993655677676	1.1945063128187	3.38966677322433	1.21436680351631	0.231049060186648	0.5364793041447	1.80388201728501	1.75249845734259	0.173286795139986	0.231049060186648	1.22962648470465	0.705948917515615	211.675666517381
WGP18	0.274653072167027	2.10131884466723	0.462098120373297	0.447939867307014	0	0	0.462098120373297	1.70798799313442	0.366204096222703	4.92072584207097	1.79025335504391	0.462098120373297	0.924196240746594	1.34178389691172	2.33916871431375	1.02358614055553	0.366204096222703	2.16407994500682	1.77584895793858	242.751519578399
WGP19	0.346573590279973	4.28725257064246	0.366204096222703	0.794513457586986	0.173286795139986	0.462098120373297	0.462098120373297	1.4391627045121	0.366204096222703	1.25463520074217	1.04284068818674	0.231049060186648	0.597253156409352	1.38629436111989	0.366204096222703	0.346573590279973	0.366204096222703	1.49993655677676	2.26036923028117	186.732043885129
WGP20	0.447939867307014	4.90381789441677	1.44793514061789	1.14108704786696	0	0.597253156409352	0	1.79787584878412	0.828302216596	3.11973249713633	1.66249927498191	0.366204096222703	0.732408192445407	1.656604433192	0.828302216596	0.346573590279973	0	1.05935127678265	1.69110014136559	252.88072540503
WiW01	1.92518694862795	2.76888277923115	4.60886166974417	2.94174652972979	0	0	1.05935127678265	1.57283295709836	0.231049060186648	3.94054271974208	2.14070310319967	0.462098120373297	5.16841243387573	1.2904003369693	1.47693893294777	0	0.732408192445407	1.656604433192	1.28530673593073	324.171215326415
WiW02	0.447939867307014	3.32568676484156	0.366204096222703	0	0	0	0.693147180559945	1.15524530093324	1.31708123952714	4.71426214379409	1.4700056063312	0.366204096222703	0.231049060186648	1.3647815207407	0.231049060186648	0.173286795139986	0.5364793041447	0.963457252632055	1.6330402108471	216.304955805512
WiW03	0.621226662447	4.30686013033361	0.231049060186648	1.85030781610325	0	0	0.462098120373297	2.64816405464405	0.462098120373297	4.1348059212468	1.31127914179201	0.998577424517997	1.54165760442809	0.767528364331349	1.59583058092735	0.346573590279973	0	3.03499328543945	1.67996936327168	264.171162579271
WiW04	1.84754535705661	4.18794381278329	0.231049060186648	0.346573590279973	0.173286795139986	4.39179296264198	0.366204096222703	1.52144939715595	0.87968577653842	4.38560942615647	1.32650590112402	0	2.64579156538777	1.26888749659011	0.597253156409352	0.346573590279973	0	3.45607578403559	0.994606209180887	268.234850614111
WiW05	3.10678350766001	4.3259358110308	0.366204096222703	0.794513457586986	0	0	0.366204096222703	1.46067554489129	0.828302216596	4.99534084586957	1.50497105078145	0.231049060186648	2.16407994500682	1.15524530093324	1.84314302917047	0.722592939474041	0	3.08235265163711	1.09362723497516	267.346120519811
WiW06	0.274653072167027	4.34548298453796	3.093039962457	0.173286795139986	0	0.366204096222703	0.366204096222703	1.74724900501988	0.597253156409352	3.393418712207	2.06157994727426	0.597253156409352	0.366204096222703	0.963457252632055	1.95454372519937	0.346573590279973	0	2.39764474040527	0.971770680474902	286.310491434354
WiW07	0.549306144334055	3.56115716919254	1.86116543626057	0.173286795139986	0	0.732408192445407	0.767528364331349	1.15524530093324	0.597253156409352	3.53256655117371	1.78663765740997	0.231049060186648	0	0.732408192445407	0.462098120373297	0.173286795139986	0.828302216596	0.828302216596	2.78762908052788	281.464708644376
WiW08	0.447939867307014	4.32336720746302	0.828302216596	1.44977316361513	1.10770419971083	2.10692276475019	0.693147180559945	6.85835945173083	1.67021176469875	4.68389515424058	1.60873669590547	0.597253156409352	3.27740211684372	0.828302216596	2.5773102406495	0.173286795139986	0.5364793041447	0.828302216596	1.12288357963888	315.531703170561
WiW09	2.85254039378992	3.8956428855081	0.231049060186648	0.978005751357036	0.402359478108525	0	0.366204096222703	2.15382272545124	1.8184403717859	5.33226739121211	1.53762718359263	0.231049060186648	3.16925824529021	0.998577424517997	1.6326132666503	0.519860385419959	0.231049060186648	1.44793514061789	2.46834474298159	315.693204808121
WiW10	0.866433975699932	3.41916184715617	0.231049060186648	0.173286795139986	0.173286795139986	0	0	2.07419208935712	1.95073415992482	4.6680745220357	1.46713746055965	0.231049060186648	1.3647815207407	0.998577424517997	1.44357778009544	0.173286795139986	1.05935127678265	2.53028404122953	1.25640356114493	243.788160876774
WiW11	1.4837235489049	4.40785027623267	2.3130846486805	0.621226662447	0.447939867307014	0.366204096222703	0.231049060186648	1.97829806520653	3.3758102613403	3.80285665218224	1.56583872755706	0.231049060186648	0.693147180559945	1.3647815207407	0.597253156409352	0	4.10079410855586	3.00526142583796	2.26998418647166	311.821093641508
WiW12	0.346573590279973	4.70464295657098	0.462098120373297	1.3064366684283	0.274653072167027	0	0	2.12557564929954	2.05792870130065	4.05395700332032	1.65615965637849	0.231049060186648	1.38629436111989	1.05935127678265	0.462098120373297	0	0	1.52144939715595	1.34556846244107	268.897014056999
WiW13	0.621226662447	4.1326396582638	0.231049060186648	1.56441689697066	0.447939867307014	0.462098120373297	0	1.99715484903599	1.92277366526459	4.64445040751124	1.83206240639763	0.231049060186648	1.05935127678265	0.828302216596	1.2125287199088	0	0.366204096222703	1.76610578884935	1.13029384116843	289.474136034509
WiW14	0.895879734614027	3.97341861993653	0.231049060186648	0.274653072167027	0.346573590279973	1.03034748445277	1.88765349337865	2.31565866404514	1.77917935990044	4.83764943859156	2.42589749050347	0.231049060186648	0.693147180559945	0.462098120373297	0.693147180559945	0.346573590279973	0.693147180559945	1.85864970104877	1.21651313000704	308.138587771855
WiW15	0.748933068388498	2.57430372118653	0	2.04924698181472	0.621226662447	0.231049060186648	0.231049060186648	2.61067139350182	2.484906649788	5.08559262658995	1.96602522294524	0.462098120373297	0.462098120373297	0.998577424517997	0.462098120373297	0.575646273248511	0.231049060186648	1.15524530093324	1.53176941977166	274.627144127902
WiW16	0.833051127543801	4.65612660352361	0	1.04741368550661	0.850299345415539	0.231049060186648	0	2.51158755234585	3.01259036887497	4.55656703662786	2.00646430267734	0	1.11073483672507	0.963457252632055	1.54490966274321	0	0.5364793041447	2.29105461140417	1.37884921810003	340.384947860272
WiW17	0.447939867307014	3.45564600409196	0	1.06916652975401	0	2.06480179703489	1.35348100351547	1.15524530093324	1.52144939715595	4.21301272298837	2.00111656258227	0.231049060186648	3.34372563789234	0.462098120373297	0.462098120373297	0.173286795139986	0.924196240746594	1.79787584878412	1.5690609394198	319.80202380365
WiW18	0.957160349122274	4.43941886934464	0.231049060186648	2.75700686580354	0	0.828302216596	0.462098120373297	1.22962648470465	3.40531993126504	3.65944539585373	4.03066194006114	0	0.732408192445407	0.231049060186648	1.05935127678265	0.722592939474041	1.47693893294777	2.31693825614753	0.920817117055083	329.365810232714
WiW19	3.65094652090395	4.73726819128578	0.597253156409352	0.621226662447	0.519860385419959	0.231049060186648	0.902683400367403	2.42413279752335	4.83773711835255	4.22643686578667	1.9814618374365	0.597253156409352	0.597253156409352	0	1.26139654463942	0.274653072167027	1.1945063128187	1.3647815207407	2.37105939240591	347.252765012101
WiW20	0.794513457586986	3.7070654900294	0.462098120373297	0.823959216501082	0	3.13343311863312	2.50219726002361	0.998577424517997	0.902683400367403	1.13911067064885	1.22095183574493	0	0.462098120373297	0	2.30983892358788	0.722592939474041	0	1.26888749659011	2.06505931101836	272.054188623467
WiW21	0.173286795139986	3.57539358199915	0	1.03972077083992	0.274653072167027	0.231049060186648	0.924196240746594	1.22962648470465	1.34178389691172	3.85651592732258	1.44431428798043	0.231049060186648	4.33198088133828	0	2.21329194460885	0	0	1.46067554489129	0.903990969104171	228.034259763069
WiW22	0.274653072167027	4.05800879378742	0	0.677012550275553	0	0.462098120373297	0.87968577653842	0.828302216596	1.1945063128187	4.51229791750004	1.38155482813512	0	1.92277366526459	0.231049060186648	0	0	0.231049060186648	0.597253156409352	2.22012482593609	227.174105219485
WiW23	0.621226662447	2.74369264839537	0.231049060186648	0.866433975699932	0	0.924196240746594	0.366204096222703	1.87707059394046	1.1945063128187	2.51529764989637	2.97146751412111	0.462098120373297	0.597253156409352	0.902683400367403	0.462098120373297	1.81016242356387	0	1.38629436111989	0.919450052624204	329.165127517726
WiW24	2.21155228184025	4.07465669484993	0	0	0	1.1945063128187	2.7404929824224	3.44849247844222	0.998577424517997	3.72204755293032	1.6650956883527	0.231049060186648	1.34178389691172	0.5364793041447	2.01022842008709	0.274653072167027	0.597253156409352	1.3647815207407	0.610952302716579	263.635756320283
WiW25	4.028877076667	5.28111677988453	0.462098120373297	0.722592939474041	1.1358236955675	0	1.05935127678265	0.462098120373297	0.963457252632055	3.13033705769685	2.76565845470279	0.924196240746594	3.21834206441254	0.462098120373297	1.76610578884935	0.346573590279973	0	1.2904003369693	0.485885340237451	299.071972384919
WiW26	0	1.93116756232187	0	0.946047408479565	0	0	0.231049060186648	0.87968577653842	0.597253156409352	3.84772250130995	1.33312940673027	0.231049060186648	4.56660636115603	0	0.462098120373297	0.274653072167027	2.74714656327658	1.34178389691172	0.297063077382834	186.162341525246
WiW27	0	2.70857320549368	0	0.934417404570842	0.173286795139986	0	0.231049060186648	0.767528364331349	0.597253156409352	5.28674076288726	1.44233364084395	0	1.34178389691172	0.998577424517997	0.231049060186648	0.173286795139986	0.231049060186648	0.902683400367403	1.2704515469622	204.831386123361
WiW28	0.173286795139986	3.89308472810949	0	0.659764332403815	0	0.963457252632055	1.1945063128187	0.924196240746594	0.231049060186648	3.65996699704767	1.07802453974331	0	3.32681619789075	0.462098120373297	1.54165760442809	0.346573590279973	0.231049060186648	1.05935127678265	1.40030272259255	199.553155916233
WiW29	0.173286795139986	4.30609520335435	0	0.722592939474041	0.173286795139986	0.231049060186648	0.828302216596	0.648636716351771	1.05935127678265	4.76457357130963	1.01078648976515	0	0.998577424517997	1.4391627045121	1.08603217934049	0	0.597253156409352	2.67539006498214	1.64057600590218	235.959092251637
WiW30	0	2.12518491043346	0	2.83811874574861	0	0	5.16913344508644	0.963457252632055	0.828302216596	1.73860514744459	1.42106538942369	0	0.5364793041447	0.828302216596	0.597253156409352	0.173286795139986	0.231049060186648	1.3647815207407	0.808994354305135	173.070829788313
WiW31	0.173286795139986	3.46697353803921	0	0.173286795139986	0	0	0.231049060186648	1.59583058092735	0.5364793041447	4.56222536982179	1.46628110025606	0	0.462098120373297	0	1.34178389691172	0	0	1.47693893294777	2.00367700971589	206.041352340688
WiW32	0	2.79397409329635	0	0.659764332403815	0.549306144334055	0.231049060186648	0.231049060186648	3.08293051945014	0.231049060186648	3.90986366861638	2.43471540289271	0	0.231049060186648	0	2.2674649211081	0.173286795139986	0	1.72349466501272	1.03345388282141	215.10304435124
WiW33	0	4.40011771320235	0	2.64614053796545	0	0	0.597253156409352	0.693147180559945	0	3.92785303344425	1.05942649299808	0.231049060186648	0	0.231049060186648	1.89791071293423	0	0	4.39446608933007	0.485885340237451	224.658385611845
WiW34	0.173286795139986	3.96982964466997	3.6109244933017	0.402359478108525	0	0.462098120373297	0.597253156409352	1.05935127678265	1.47693893294777	1.30188485867826	3.10471279636131	0	1.13373246055405	0.462098120373297	1.86614065299946	0	5.04564735956471	1.7309856169634	0.511931276922301	286.462145647098
WiW35	0	2.2611245806491	0	0.346573590279973	0	0.231049060186648	2.52348108401912	0.462098120373297	1.09861228866811	3.06225953290636	2.17596240802081	0.231049060186648	2.59021507804306	0.5364793041447	0.231049060186648	1.02358614055553	0	0	0.255965638461151	170.247306688191
WiW36	0	4.62015795367576	0	1.09550665866847	0.173286795139986	0	0.693147180559945	0.828302216596	0.231049060186648	4.25593639758165	1.5614590689722	0	0.5364793041447	0.924196240746594	0	0	0	1.24588987276112	2.87807725234336	236.696442084286
WiW37	0.173286795139986	3.65346569966016	0.231049060186648	2.70358085843183	0	0	0.767528364331349	0.693147180559945	0.5364793041447	1.26214255372744	1.73828738676892	0	0.767528364331349	1.99211696976598	1.32966134885476	0	0	1.38629436111989	0.297063077382834	235.541744740836
WiW38	0	3.15898513086648	0	0.73610974479161	0	0	0.963457252632055	0	0.462098120373297	4.65396093007297	1.41943831585826	0	0.597253156409352	0.231049060186648	0	0.677012550275553	0	4.14201706450041	0.499501080209497	183.096879166588
WiW39	0.173286795139986	3.09043561611061	0	1.22070048064659	0	0	0.902683400367403	0.648636716351771	0.828302216596	4.2297008484746	2.12938777617253	0	0.693147180559945	1.11073483672507	0.231049060186648	0	0.648636716351771	2.04009913965032	0.584906366031729	220.628776527252
WiW40	0.173286795139986	2.04205658285602	0	0.274653072167027	0	0	2.04662818407542	0	0.231049060186648	4.52380819139133	1.71584157287811	0.231049060186648	4.1269832984783	0.231049060186648	0.693147180559945	0	0.828302216596	4.33268822024208	0.255965638461151	196.164052701185
WiW41	0.173286795139986	3.63350228805348	0.231049060186648	0.346573590279973	0	0	0	0.597253156409352	0.231049060186648	4.23176804511227	1.55075423167436	0	0.366204096222703	0	0.87968577653842	0	0.597253156409352	2.23846112877823	0.454007690049707	213.366377487151
WiW42	0.173286795139986	4.77763380627074	1.31708123952714	1.50887035813119	0	0	0.462098120373297	0.462098120373297	1.15524530093324	2.19144866601691	1.74221338674934	0.231049060186648	0.462098120373297	0	0.231049060186648	0	4.48139919004562	1.79175946922806	0.328940727570578	246.797012277406
WiW43	0	4.20022455650053	0	1.49535355281362	0	0.462098120373297	0.597253156409352	1.0729586082894	2.85130359145047	4.38463241456437	1.66309736567042	0	1.79175946922806	1.13373246055405	0	0	1.13373246055405	1.52144939715595	0.526982779159134	218.144278177518
WiW44	0.346573590279973	3.66051836646498	0	0	0.173286795139986	0.462098120373297	0.693147180559945	1.42555537300535	2.31340748970655	4.74073838811959	1.10934365981068	0	1.16550252048883	0.693147180559945	0.597253156409352	0	0	1.18511602049647	0.386864314443173	214.692144087554
WiW45	0	4.29310772445173	2.7590525908106	1.65030752968222	0	0.231049060186648	1.38104490879718	5.03361895878522	0	4.30373521326742	2.1378160117188	0	0.828302216596	0.597253156409352	0.828302216596	0.519860385419959	4.11888900305155	3.00233314931938	0.277987164150759	309.438389353114
WiW46	0.346573590279973	2.92730613086289	0.231049060186648	0.346573590279973	0	0	3.02506923266156	2.45209329218358	0.462098120373297	3.99431652352215	1.51651320299022	0	0.366204096222703	0	0.648636716351771	0.402359478108525	0	1.47693893294777	2.62395159434067	209.627238070704
WiW47	0.346573590279973	5.21062272417593	0.231049060186648	0.173286795139986	0.519860385419959	0.231049060186648	0.5364793041447	1.85356054367184	0.828302216596	3.03680477822408	2.2386435588335	0	3.21029703916746	0.828302216596	2.64934399687909	0.621226662447	0	2.1187025535653	2.39214765459399	276.85267349187
WiW48	0.346573590279973	4.67267144962101	0.231049060186648	0.934417404570842	0	0	0.366204096222703	1.77270666461474	0.828302216596	5.02443772425501	2.0494656259232	0	1.18511602049647	0.828302216596	1.22118721537655	0.519860385419959	0	2.41474250520112	1.1669266310181	257.680029287698
WiW49	0.346573590279973	2.9702165645392	0	1.60903759209236	0	0	0.366204096222703	1.70798799313442	0	3.4805615883352	2.12571954482439	0	0.231049060186648	0	0.924196240746594	0.173286795139986	0	1.40650256839204	2.28707571490736	197.690286494685
WiW50	0.274653072167027	3.78413573248468	0.732408192445407	0.346573590279973	0.722592939474041	0.5364793041447	0.462098120373297	0.462098120373297	0	3.5392224018104	1.65017770176941	0	0.902683400367403	0	1.13373246055405	0	0.462098120373297	3.05410164097921	2.04073058674124	238.285477291093
WiW51	0.173286795139986	4.0262579213337	0.5364793041447	0.575646273248511	0.621226662447	4.00556542062084	1.6326132666503	1.68328533574985	1.61209396898383	2.67202360325827	2.77711501592447	0.231049060186648	1.5350567286627	0	2.99639827444155	0	0	5.19498087176941	0.738640570719736	266.982312817492
WiW52	0.274653072167027	4.07697608425315	0	0.346573590279973	0.173286795139986	0.366204096222703	1.16550252048883	2.69975018726565	0.597253156409352	4.16309997555141	2.76123546049735	0.231049060186648	0.462098120373297	0	0.963457252632055	0.402359478108525	0.231049060186648	2.58596873611725	0.808994354305135	262.844304607673
WiW53	1.17053280678105	3.18907771893556	0.462098120373297	1.15624320332107	0	0.462098120373297	4.3089449977077	2.06412082982496	0	2.63402617921308	2.71063630304068	0.231049060186648	0.732408192445407	0	1.76776830268636	0	0.231049060186648	1.89452658911289	1.83547821367377	248.430279484725
WiW54	0.447939867307014	4.61468949834578	0	0	0	0	2.2040136782777	0.231049060186648	1.13373246055405	4.65292608773551	1.07830293664014	0	1.30400766847605	0	0.828302216596	0.447939867307014	0	0.998577424517997	3.58421867388987	240.351704287381
WiW55	0.346573590279973	4.70446446932479	0.231049060186648	0.173286795139986	0.173286795139986	0.231049060186648	0.963457252632055	0.597253156409352	3.59547610157624	3.94465214919201	2.17313651129123	0	0.87968577653842	0	2.34626118046285	0	0.231049060186648	4.17396217722856	2.25016311051587	293.722261803576
WiW56	0.274653072167027	3.64689392811056	0.693147180559945	0.402359478108525	0	1.39655158067548	0.231049060186648	0.902683400367403	1.33577772841082	4.54970517595899	2.31109301817003	0	0.924196240746594	0	1.73649538428047	0.346573590279973	0	2.23234474922216	1.22805342704153	261.915101655062
WiW57	0.748933068388498	4.63406929661694	0	1.44441308080566	0	0	0.693147180559945	2.85924123038542	0	2.13087146785381	1.46010003874209	0	2.47946117668144	0.231049060186648	3.82989925961697	0	0.231049060186648	1.49993655677676	1.31970793414417	252.502220552386
WP01	3.47219025492597	3.97096426898761	0	1.83488442385192	0	0.462098120373297	0	1.70798799313442	1.61209396898383	2.40101588648328	1.10896686891817	0	2.25539723822012	1.24588987276112	0.693147180559945	0.173286795139986	0	2.70337560064703	2.40395948488731	318.486734834037
WP02	3.78433659868669	3.0059085851351	2.08906684951379	0.447939867307014	0.621226662447	0.597253156409352	0	2.29311860148681	1.49993655677676	3.28783290705552	0.918684216560459	0	1.56682678859747	1.47693893294777	1.15524530093324	0	0.231049060186648	2.12895977312088	1.39935097261749	258.792682529008
WP03	1.3701597308355	3.27420865779069	0	1.20907047673787	0.346573590279973	0.231049060186648	0.597253156409352	2.11345310124258	2.36995982102409	4.33930613445129	1.47734638148688	0.462098120373297	1.93903705332107	0.998577424517997	3.60994254008776	0	0.231049060186648	1.59583058092735	3.00862910742208	320.029517059401
WP04	5.07618030848849	2.98288935232028	0.693147180559945	3.32461976270252	0.519860385419959	0	0	2.41139239324995	2.45590285745812	3.34389910834515	2.59138972831592	0.693147180559945	0.767528364331349	0.732408192445407	0.924196240746594	0.173286795139986	0	1.4522362755632	3.54972864779642	303.750336228044
WP05	1.14108704786696	2.63693797848656	2.18559278538601	2.55855727861209	0.173286795139986	0.828302216596	0	2.32823877337275	2.32823877337275	4.33657388300486	1.85270251182704	0.963457252632055	1.47693893294777	1.05935127678265	0.998577424517997	0	4.57698405664524	1.87826320105642	2.73588616940949	337.352066707458
WP06	1.00633792268379	4.80323119211179	1.46067554489129	0.922219863528484	0.794513457586986	0	0.767528364331349	1.826879641114	2.37213138136449	3.69642662618281	1.55146852516334	0.231049060186648	3.65783152806463	1.1945063128187	1.16550252048883	0.173286795139986	4.0854364606523	2.30524114954377	2.27283931347171	385.673092048538
WP07	0.173286795139986	3.49305622731053	0.231049060186648	0.693147180559945	0.274653072167027	0.231049060186648	2.31501702124194	2.01341823709247	1.91752421294188	3.21774283292446	1.73384068594529	0.462098120373297	1.96203467715005	0.732408192445407	0.767528364331349	0.346573590279973	0.231049060186648	1.59583058092735	1.27580378131051	282.583928262584
WP08	0.621226662447	4.11033949645801	0.231049060186648	3.63671948783598	0.621226662447	0.231049060186648	0.231049060186648	2.77775678441844	3.50662055809672	2.02772916847945	2.48981440157496	0.828302216596	1.67021176469875	1.3647815207407	0.828302216596	0.346573590279973	0.366204096222703	2.05792870130065	1.46687580944629	305.958935019539
WP09	0.621226662447	4.06781831815442	0.924196240746594	0.447939867307014	0	0.231049060186648	4.22114895279192	0.828302216596	1.32966134885476	1.80458301551113	3.1811706949223	0	0.462098120373297	0	0.693147180559945	0.173286795139986	6.51502815847403	0.828302216596	0.741850978698602	279.113930672099
WP10	0.173286795139986	3.27638275059155	1.83238940843107	1.25923815060341	0	0.231049060186648	3.49949016143628	0	0.597253156409352	3.89480144832114	1.65973920684168	0	0.231049060186648	0	0.366204096222703	0.722592939474041	0.944404448018739	1.52144939715595	2.16794645732868	275.577839354988
WP11	0.346573590279973	2.71296301278785	2.02434817803347	0.693147180559945	0	0	0.597253156409352	0.231049060186648	0.963457252632055	3.43604265075162	1.63679389287783	0	0	0	0	0	0.998577424517997	0.462098120373297	1.76518344977227	193.803112210322
WP12	1.39681216460006	3.0689523777967	5.85131279624397	2.69345452800848	0	0.693147180559945	0	1.05935127678265	0.693147180559945	1.73302074805944	2.7276307108619	0	0.366204096222703	0	0.366204096222703	0.967800252726973	3.18464335878875	0.597253156409352	1.21426336472587	333.184307437462
WP13	0	2.14660306409228	0.366204096222703	0	0.173286795139986	0.854983119153846	0.366204096222703	0.231049060186648	0.231049060186648	0.697584223436513	2.20685941675225	0	0.366204096222703	0	1.75249845734259	0	0	1.76275567689818	2.75018992935696	189.413555070002
WP14	0.447939867307014	1.99113283193558	1.90786170065079	1.18404961209862	0	1.11073483672507	0.231049060186648	0.231049060186648	0	0.901914431275567	1.68484064239005	0	0.462098120373297	0	0.828302216596	0.447939867307014	0.597253156409352	1.1945063128187	4.50236117160213	191.802752414388
WP15	0	3.1500944283383	5.76720962772727	2.18983868714155	0	0.767528364331349	0	0.462098120373297	1.42555537300535	1.47663129854094	4.06758432360719	0	0.231049060186648	0	0.5364793041447	0.946047408479565	1.97296461809105	1.05935127678265	2.24293649017833	335.860455603833
WP16	0.519860385419959	3.21685571228548	4.80099535445006	4.10792714835836	0.173286795139986	3.74937541279573	0.693147180559945	0.767528364331349	0.732408192445407	1.24734447043819	1.68365229403752	0	0.366204096222703	0	0.767528364331349	0	3.07540457371082	0.828302216596	0.683927391826007	303.122750735069
WYC01	2.42577087204785	3.60924342885055	0.648636716351771	1.78471674998638	0	4.10360965956884	0	1.53170661671153	2.8039442252528	3.53375514581965	2.651457128512	1.09861228866811	0.998577424517997	0	5.15363667737631	0.708303336014054	1.38629436111989	1.46481638489081	1.64579091828165	324.754074890938
WYC03	0.346573590279973	2.0714215597618	0.87968577653842	1.26879345380846	0	0	0.924196240746594	0.828302216596	0.693147180559945	3.78412594719194	2.65287372484284	0	0.767528364331349	0	3.04963013655332	0.748933068388498	0.462098120373297	1.59583058092735	0.816718243058032	300.956802118449
WYC04	0.274653072167027	3.69026352633167	2.28372830916458	0.895879734614027	0.915890411532412	0.462098120373297	0.732408192445407	0.462098120373297	0.231049060186648	4.06261336211884	1.71776480154479	0	0.231049060186648	0	0.828302216596	0.748933068388498	1.39655158067548	3.05754616826406	0.652049741638262	245.635503323529
WYC05	0	2.05785576470549	2.8148741661938	2.23541907634004	0	0	1.32966134885476	1.4522362755632	0.231049060186648	3.98331401577223	2.81334088013342	0	0	0.5364793041447	0.902683400367403	0.922219863528484	4.08685361027141	2.08779942086387	0.804969943309893	275.109811757833
WYC06	0.866433975699932	1.64618127657124	1.41616508068312	0	0.173286795139986	0.231049060186648	0.366204096222703	0.732408192445407	0.693147180559945	1.38682308215704	2.09397692407591	0	1.46067554489129	0	1.49244560482607	1.55564406701784	0.828302216596	6.02641784389661	0.920817117055083	213.571835186751
WYC07	0.173286795139986	1.87461922888233	0.231049060186648	1.23541060565233	0	0	0	1.22962648470465	1.656604433192	4.20710194550472	2.91529996587123	0	0.597253156409352	0	2.27187999669144	1.93947655208794	1.70798799313442	2.81644750816935	0.741850978698602	256.191941191449
WYC08	0.621226662447	3.38415720392319	2.17986198520589	3.3714451850166	0	4.22702127209565	0.462098120373297	1.81124066785141	0.693147180559945	2.16829865229281	5.03415663774445	0	0.828302216596	0	2.09718971318611	2.5094609012588	4.44738470477092	4.82882244759218	0.767896915383452	423.885622776396
WYC09	0.447939867307014	2.03696178044534	0.231049060186648	0.693147180559945	0	0.462098120373297	0.924196240746594	0.231049060186648	0.767528364331349	3.70983855666551	2.13743983066271	0.924196240746594	0.693147180559945	0.597253156409352	0.462098120373297	0.693147180559945	0	1.56071040904141	0.412910251128024	197.454801036682
WYC10	0.722592939474041	1.57207859248344	0.828302216596	1.51006367781935	0.173286795139986	0.231049060186648	0	0.597253156409352	0.924196240746594	3.39132344759403	1.96811571882446	0	4.49723551318347	0	5.75657039484942	0.748933068388498	0.231049060186648	1.61209396898383	0.939893030287157	210.497998636267
WYC11	0.346573590279973	3.72380113274677	0.87968577653842	1.25265882352406	0.274653072167027	0	0	0.231049060186648	0.597253156409352	3.69726321755235	1.58568387236454	0	0.597253156409352	0	1.57283295709836	0.346573590279973	0	1.32966134885476	0.850091793226818	244.583878747554
WYC12	0.447939867307014	1.55806817339953	1.656604433192	0	0	0.462098120373297	0.366204096222703	0.828302216596	0.366204096222703	3.61787697017102	1.62497191357843	0.231049060186648	0.462098120373297	0	0.366204096222703	0.447939867307014	0.231049060186648	0.963457252632055	2.65971136846569	204.740363624718
WYC13	0	1.55351274229973	0.231049060186648	0.346573590279973	0	0.462098120373297	0.462098120373297	0.462098120373297	0	4.85732265612883	2.08553010070995	0	0.693147180559945	0	2.19676701606556	0.274653072167027	0.231049060186648	2.1187025535653	0.831015879994743	188.386451367448
WYC16	0.402359478108525	1.69728815367215	3.63056318662576	1.28099099485081	0	0.231049060186648	0.767528364331349	0.231049060186648	0.5364793041447	3.76298099305533	2.78222025255366	0	1.91003326099119	0	0.462098120373297	1.32206675767363	0.462098120373297	0.231049060186648	1.04588407953421	280.080050430986
WYC17	0.173286795139986	3.19218909906826	0.231049060186648	1.29823921272255	0	0.231049060186648	0.5364793041447	0.231049060186648	0	3.15959778758697	1.99803389428193	0	0.366204096222703	0	0.231049060186648	1.41574012003399	0.462098120373297	1.05935127678265	3.7710526533498	227.063679641542
WYC18	0.402359478108525	2.24541231576866	0.693147180559945	0.274653072167027	0.173286795139986	0.231049060186648	0.231049060186648	0.693147180559945	0.462098120373297	3.72017825664853	1.98157014722552	0	0.693147180559945	0	0.462098120373297	0.833051127543801	0.462098120373297	1.57283295709836	1.50841898084458	190.103427467094
WYC19	0.549306144334055	2.75493595333738	0.854983119153846	0.346573590279973	0	0.231049060186648	0.231049060186648	0.597253156409352	0.87968577653842	2.84107424134239	1.72134980872307	0	4.77804747783652	0	0.963457252632055	0	0.231049060186648	1.656604433192	0.86691794117773	211.950530972788
WYC20	0.447939867307014	1.02777089547597	0	0.346573590279973	0	0.366204096222703	1.22118721537655	0.597253156409352	0.366204096222703	3.61163761347889	1.33793947180128	0.462098120373297	4.75587525471844	0	0.366204096222703	0.274653072167027	0.462098120373297	0.963457252632055	0.610952302716579	199.603804507259
WYC21	0	1.82991537534139	0	0.447939867307014	0	0.231049060186648	0.366204096222703	0.693147180559945	0	4.08921070177878	2.03120860361943	0	3.97293016436657	0	0.231049060186648	0.693147180559945	0.231049060186648	1.97829806520653	0.668875889589174	210.379800240027
WYC22	0.274653072167027	1.6040884439113	0.597253156409352	1.03972077083992	0	0	0.231049060186648	0.231049060186648	0.828302216596	3.71789226968503	2.50605242150453	0	3.48335866491521	0.998577424517997	0.462098120373297	1.8931257462551	0.231049060186648	1.41616508068312	2.29972511200962	218.181713332884
WYC23	1.23541060565233	1.05757800731562	0.924196240746594	0	0	0	0.231049060186648	0.231049060186648	0.231049060186648	1.10222334571253	1.11907326076762	0.231049060186648	4.72230688898323	0	0.597253156409352	0.621226662447	0.462098120373297	0.828302216596	4.1222718521409	176.801631035105
WYC24	0.621226662447	1.47348809941573	0.231049060186648	1.2130075659799	0	0	0.366204096222703	0.231049060186648	0.231049060186648	5.27061475371583	1.58916315377936	0	1.42555537300535	0	0.231049060186648	0.447939867307014	0.648636716351771	1.63509159281281	1.29782530700012	199.386002707963
WYC25	4.60346206389325	1.45337678837279	0.366204096222703	0.967800252726973	0.346573590279973	0	0.366204096222703	1.656604433192	0.732408192445407	3.57241607255108	1.64306997778443	0.648636716351771	2.49177974552225	1.42555537300535	2.01341823709247	0.447939867307014	0	5.92720722288505	0.602786815025158	245.211292819643
WYC27	0.519860385419959	2.94399258143822	0.231049060186648	1.47152600786254	0	0.597253156409352	0	1.2904003369693	1.1945063128187	2.81544479573135	1.23057137050993	0.366204096222703	0.828302216596	1.3647815207407	5.63263554937193	0.173286795139986	0.366204096222703	2.03493107747166	0.663484414163053	231.383578229965
WYC28	1.16585977352802	3.93996738455821	0	2.36574126315314	0.346573590279973	1.09861228866811	0	2.23602802795102	0.366204096222703	1.12073643540623	4.67839326307295	0.366204096222703	0.231049060186648	1.52144939715595	1.42555537300535	2.96803429714023	0.231049060186648	4.04622735370799	1.38446913446575	376.449379290386
WYC29	2.89033365104448	1.78583059687582	1.63509159281281	0.402359478108525	0.173286795139986	1.13373246055405	0	0.828302216596	0.462098120373297	1.29248980676531	2.79524292180126	0.462098120373297	0.597253156409352	0.231049060186648	0.998577424517997	1.94329342012063	0	1.86860068876533	0.476029215739315	241.181845153457
WYC30	0.549306144334055	1.75088734134232	0.366204096222703	0.346573590279973	0	0	0	1.64721414086977	0.828302216596	3.08000548044452	1.76661050412988	0	0.924196240746594	1.61209396898383	0.767528364331349	0.173286795139986	0	1.1945063128187	0.485885340237451	190.215764186854
WYC31	1.11933420361955	2.62631780847363	0.366204096222703	3.19783904505354	0	2.63366901733081	0	2.04518829702725	0.597253156409352	2.02261373584761	4.19594285866222	0.231049060186648	3.35486182429282	0.366204096222703	1.05935127678265	3.50159470518167	0	2.66912235599444	2.27741191347551	399.256126257018
WYC32	0	3.39215256716576	1.13373246055405	3.16430696988886	0	2.46707708813767	0	2.65725870762688	2.39764474040527	1.67129851431291	5.73565412787899	0.924196240746594	2.04948943197255	1.52144939715595	3.1391181804535	2.08331758831383	0	4.7842678695498	0.683927391826007	513.973756902454
WYC33	0.173286795139986	1.70716256591304	0	1.73913636078789	0	0.231049060186648	0.231049060186648	0.924196240746594	0.998577424517997	1.50969747104815	2.95524934142209	0.828302216596	1.26888749659011	0.597253156409352	1.9012608248854	1.94371394166638	0	4.81040085177333	0.526982779159134	248.032821840009
WYC34	1.14108704786696	2.52763672250407	0.767528364331349	0.402359478108525	0.519860385419959	0	0.366204096222703	1.56071040904141	0.767528364331349	2.06542060882004	2.50819258701169	0.231049060186648	0.462098120373297	0.597253156409352	2.66789911303146	2.06641254139508	0	3.26043997285397	0.575050241533593	274.976012284565
WYC35	0.519860385419959	1.92747590986784	0	2.34356083581153	0	0	1.2378573555681	1.15524530093324	0.231049060186648	1.18337869676666	3.01888909920854	0.732408192445407	0.462098120373297	0.828302216596	3.01104191751679	2.40180888235032	0	2.18559278538601	0.49510512897139	230.521201483991
WYC36	0.173286795139986	3.74769183818198	3.20446753182268	2.08156869684919	0.274653072167027	0.462098120373297	3.18179433859593	1.76610578884935	2.56751870442286	1.45155402360746	4.28350512116774	0.366204096222703	0.693147180559945	1.3647815207407	1.98354751752924	1.242453324894	0	5.02987857377054	1.00402877600829	351.529539265825
WYC37	1.7570503580145	3.43658068725977	0.462098120373297	3.79540055294166	0.173286795139986	0.799298424266124	0	2.8511107460107	1.41616508068312	1.37104047678127	4.35941264289212	0.231049060186648	0.963457252632055	1.67021176469875	0.366204096222703	1.38036522946556	0	3.86880526935252	0.54059851913118	317.264776256112
WYC38	3.24800671891908	1.33409236523761	3.38057224708946	0.173286795139986	0.173286795139986	0	0.231049060186648	1.3647815207407	0.462098120373297	1.13185972256638	1.61903569191351	0.231049060186648	0.693147180559945	0.597253156409352	0.462098120373297	0.274653072167027	0	1.2904003369693	0.668875889589174	187.898664749031
WYC39	0.173286795139986	3.59079285084094	0	2.09275267030954	0.274653072167027	0.693147180559945	0	3.18690517125546	1.01484081257447	3.32595642871885	5.36116323455533	0.828302216596	0.5364793041447	1.30400766847605	2.78543998860938	3.3639176526706	0	1.1945063128187	0.674071267327871	382.528427089337
WYC40	0.274653072167027	1.40877342755812	0	0.346573590279973	0.173286795139986	0.231049060186648	0	1.61209396898383	0.767528364331349	4.00183071688303	1.45589658551781	0	0.924196240746594	1.52144939715595	2.99489789681462	0.402359478108525	0.732408192445407	1.13373246055405	0.668875889589174	184.634106656758
WYC43	0	1.76529999863102	0	0.823959216501082	0	0.231049060186648	0.366204096222703	1.56071040904141	1.656604433192	1.05935127678265	2.54458306222974	0	0.231049060186648	0	0.597253156409352	1.96388616947892	1.15524530093324	1.38629436111989	0.796564157592331	215.03757957377
WYD01	3.0495504377874	3.72790532478587	0.462098120373297	0.346573590279973	0.346573590279973	3.97047769750363	0.597253156409352	3.71699317025852	0.597253156409352	4.23539075762535	1.62315486821482	3.4354274773628	3.12474778108204	0.597253156409352	2.82822333323689	0.346573590279973	0.231049060186648	1.42555537300535	1.21945874246457	316.280734667912
WYD02	1.5306232023786	4.36375327979495	0	0.447939867307014	0.814524134505371	0.231049060186648	0.767528364331349	3.29997707877778	0.828302216596	4.29505244740193	1.59529035574304	0.693147180559945	3.22153188141793	0.924196240746594	2.80059411330164	0.575646273248511	0	1.22962648470465	0.98099046920884	267.363959974006
WYD03	0.346573590279973	5.15211513647796	0	0	1.6427207405849	2.78684646045695	0.5364793041447	5.79078107705263	3.54656474085217	3.59584115864389	2.54784423756403	2.36224597817019	2.84231516095297	0.462098120373297	3.23460545246902	0.173286795139986	0	1.79787584878412	0.98276511492292	349.801225507845
WYD04	1.42594561866405	4.46451277338152	0	0.173286795139986	0.677012550275553	0.828302216596	0.231049060186648	3.98239079150128	0.597253156409352	3.43942925412441	1.8822943660777	0.366204096222703	0.902683400367403	0.998577424517997	4.00973870938909	0.748933068388498	0	4.99921981452006	1.46226345554624	304.138807729857
WYD05	4.29031140400591	4.22968128634739	0.828302216596	0.447939867307014	0.274653072167027	0	0.648636716351771	1.52144939715595	0	3.44136620144521	1.39211978390518	0.462098120373297	0.87968577653842	0.963457252632055	2.55179688160872	0.794513457586986	0.231049060186648	1.78236917690582	1.89819075655188	278.748278666642
WYD07	0.823959216501082	4.85243325248146	0.231049060186648	0.447939867307014	0.866433975699932	0.597253156409352	0.366204096222703	2.1187025535653	1.656604433192	3.52414017076267	2.26095979192626	0.231049060186648	1.56071040904141	1.05935127678265	3.89833233016966	0.447939867307014	0	4.76424601076644	1.0238625538446	296.827120168451
WYD08	0.402359478108525	3.29363583622034	0.231049060186648	0.447939867307014	0	4.57638934938074	0.693147180559945	1.56682678859747	0.5364793041447	3.78097480636216	1.67111643688896	0	3.36135252543043	0.597253156409352	1.9765297144633	0.346573590279973	0	1.62760064086212	1.01476029464659	251.233723572205
WYD10	0.922219863528484	4.76105047311536	0.231049060186648	0.274653072167027	1.19687293569551	0.597253156409352	0	5.74021508164121	3.6466528148888	4.12016150922175	1.82779536943612	1.1945063128187	3.75991052593417	1.55132011671917	0.998577424517997	0.274653072167027	0.693147180559945	2.32326355663386	1.41906208984344	329.451811684111
WYD11	0.621226662447	4.94043362121145	0.462098120373297	0.447939867307014	0.693147180559945	4.50943612344978	0	3.43258562929452	2.30258509299405	2.65863181861325	2.00231272705918	0.924196240746594	0.462098120373297	0.732408192445407	1.64721414086977	0.447939867307014	0	1.46067554489129	1.20282869220108	290.59830606459
WYD12	1.22070048064659	4.29218684774964	0	0.748933068388498	0.274653072167027	0	0	4.82319023214552	2.07419208935712	3.77539398794339	2.8917664052796	2.95585611106881	3.26779697866595	0.924196240746594	3.31005938926306	0.173286795139986	0.231049060186648	4.07191193548038	1.38782077541989	358.638462220836
WYM01	1.26879345380846	3.4003850252994	0.231049060186648	0.677012550275553	0	0	0.924196240746594	1.77917935990044	0.597253156409352	3.54597168225587	1.4892615186832	0	0.998577424517997	0	0.902683400367403	0.274653072167027	0.462098120373297	1.30400766847605	1.42293950278861	220.691199111054
WYM03	0.693147180559945	2.8211397212289	0.231049060186648	0.173286795139986	0	1.05935127678265	1.24588987276112	0.924196240746594	0.366204096222703	2.94969868881455	1.53172771582468	0.462098120373297	0.732408192445407	0	5.30573423619298	0.274653072167027	0.597253156409352	1.15524530093324	2.69499521217035	269.374100336426
WYM04	1.06916652975401	1.7769688302774	0.462098120373297	0.549306144334055	0	0.231049060186648	0.828302216596	0.963457252632055	0.924196240746594	1.78557649723396	1.68715022947701	0.597253156409352	0.732408192445407	0.231049060186648	1.61734342130654	0.173286795139986	0	0.828302216596	4.00069525275606	242.948017724819
WYM05	1.17053280678105	2.92930222351049	0.462098120373297	0.722592939474041	0.173286795139986	1.46067554489129	1.0729586082894	2.9186316938821	1.40650256839204	1.45869908433981	2.07523078333293	0.963457252632055	1.56071040904141	0	3.39971259821236	1.03972077083992	0.693147180559945	2.24446729727912	2.95657842802443	317.526862099776
WYM06	0.519860385419959	5.34575224251398	0	0.173286795139986	0.833051127543801	4.11439586982868	0.5364793041447	5.71518806173993	3.61533056374206	2.8131547785682	2.67643721418858	3.2660423456261	2.98441738820301	0	3.93816521652739	0.346573590279973	0.366204096222703	3.21349936422491	2.64759456105342	435.081471784717
WYM07	3.53500647011535	5.97112747463057	0.231049060186648	0.519860385419959	1.10770419971083	0.462098120373297	0.963457252632055	5.19667574025244	4.00523291851513	2.94985486827833	2.38973237029153	0.231049060186648	2.40873633670022	0	3.6974353696968	0.274653072167027	0.597253156409352	1.59583058092735	2.0957085611563	359.58329406041
WYM08	2.92297703012467	4.74520955657512	0.767528364331349	0.895879734614027	0.173286795139986	0.231049060186648	1.22118721537655	1.88765349337865	1.49993655677676	3.41502054573598	1.82867297198788	0.231049060186648	2.5451012954198	0.462098120373297	2.89293390220422	0.866433975699932	2.1187025535653	5.03155788997869	1.40533539286165	313.06034498404
WYM09	0.274653072167027	3.24602211933255	0	0.748933068388498	0	0.231049060186648	0.5364793041447	0.963457252632055	1.05935127678265	3.02441938741119	2.02944792380901	0	0.231049060186648	0.462098120373297	0.231049060186648	0.748933068388498	0.231049060186648	0.693147180559945	2.06641162631108	226.096535990842
WYM10	0.346573590279973	3.58236425922157	0	1.07937202838408	0.173286795139986	0	0.462098120373297	1.42555537300535	0.998577424517997	3.62089266037856	1.60944257131914	0.231049060186648	0.597253156409352	0	2.13230988507205	1.25265882352406	0.231049060186648	1.3647815207407	2.04780367547197	230.668214761906
WYM11	2.33795998356247	4.87853766950146	0.366204096222703	0.794513457586986	0.173286795139986	0.597253156409352	0.767528364331349	1.3647815207407	1.52144939715595	2.85787010979616	1.99757036116491	0.231049060186648	3.28765933639931	0	5.22711885684834	0.549306144334055	0.231049060186648	4.3925110495126	1.70734834673208	317.47527777338
WYM12	0.549306144334055	5.22304505478608	0.366204096222703	0.519860385419959	0.274653072167027	0.231049060186648	2.04374216316105	1.64721414086977	0.462098120373297	1.56001529628073	1.95953977565254	0.366204096222703	2.57006839814418	2.61592084582454	2.25075679204725	0.519860385419959	0	1.80536680073481	1.93889519070615	302.873295269251
WYM13	2.13522742950839	3.97553259352161	2.51477736935123	0	0.88159013115404	0.828302216596	0.462098120373297	1.47693893294777	0.924196240746594	2.41657581510674	1.76391697118092	0.693147180559945	3.9552871425407	1.83375273684824	4.10490093668521	0.346573590279973	1.42555537300535	5.79032572795107	2.89717323832316	397.930960508649
WYM14	0	4.56269649691114	0.231049060186648	0.447939867307014	0.173286795139986	0.462098120373297	0	1.656604433192	1.01484081257447	3.9603124915808	1.30001017975215	0.231049060186648	0.462098120373297	1.61209396898383	0.597253156409352	0	0.231049060186648	1.78236917690582	2.38707775276906	270.006354572306
WYM15	0.519860385419959	4.88203114917377	0	0.173286795139986	0.659764332403815	0	1.656604433192	1.91433439593649	1.0729586082894	4.18263444843897	1.22448748271295	0	0.366204096222703	1.2904003369693	0.597253156409352	0.519860385419959	0	0.828302216596	1.85922856816146	270.487875198917
WYM16	0.447939867307014	1.72242730318494	0	1.242453324894	1.4542777899908	0.462098120373297	0	4.25862545328436	0.462098120373297	2.108472563992	2.08496153688985	0.963457252632055	0.732408192445407	0.693147180559945	3.2577929557297	1.44208024894844	0.981479659722147	1.9012608248854	0.36642133678022	259.455155583186
WYM17	0.621226662447	3.63777209043316	0.366204096222703	0.967800252726973	0	0	0.462098120373297	0.231049060186648	0	3.44092936071117	2.41676338403303	0.231049060186648	3.27383932988963	0	2.23234474922216	1.91946587516955	0	0.87968577653842	0.851572191374753	247.971326224116
WYM18	1.33438451992533	3.16142890493448	0	0.693147180559945	0	0.231049060186648	0.231049060186648	0.902683400367403	0	4.44567268107889	1.38158086437795	0	1.05935127678265	0	0.963457252632055	0.621226662447	0	2.57289516506616	0.598522106003775	217.100253560884
WYM19	0.274653072167027	4.00658169481606	0.366204096222703	0.173286795139986	0	0	0.231049060186648	1.63755162857868	0.366204096222703	4.97984440028017	1.2432440197411	1.1945063128187	2.14538345612314	0	3.4056124572455	0.519860385419959	0	3.54430614839111	2.18524500269531	268.068613576531
WYM20	0.659764332403815	2.7248273108811	0.648636716351771	0.794513457586986	0.346573590279973	0	1.34178389691172	1.18511602049647	0.462098120373297	2.20755644267097	2.41389804735987	0.231049060186648	5.6925104619593	0	2.77759648947265	1.242453324894	0	1.49993655677676	1.11564876066477	260.80087186248
WYM24	0.173286795139986	3.89139986828444	0.231049060186648	0.447939867307014	0.173286795139986	0	1.0729586082894	0.693147180559945	0.462098120373297	4.24211777318232	2.25673700439674	0	0.5364793041447	0	5.45646227817488	0.621226662447	0	1.52144939715595	1.62165461636592	266.133644224251
WYM26	0.447939867307014	3.9348085805545	0	0.173286795139986	0.173286795139986	0	0.231049060186648	0.693147180559945	0.732408192445407	3.83662616818907	1.5953385996667	0	3.63374307693975	0	1.76610578884935	0.346573590279973	0	1.826879641114	1.67532319302803	242.870611413583
WYM28	0.447939867307014	4.21931548297298	0	0.621226662447	0.934417404570842	0.462098120373297	0.462098120373297	0.963457252632055	0.828302216596	3.63757542936985	1.62330231320539	0	0.924196240746594	0	0.998577424517997	0.173286795139986	0.924196240746594	0.828302216596	0.626003804953412	239.322561891962
WYM30	0.274653072167027	3.23339516755468	0	0.722592939474041	0	0	0.828302216596	1.3647815207407	2.73725146579173	3.58731501690107	1.54134114737206	0.231049060186648	0.963457252632055	0.693147180559945	1.52144939715595	1.10770419971083	0.732408192445407	5.5765103411126	1.18256003688173	258.827881200256
WYM31	0	3.7258658390602	0.231049060186648	0.967800252726973	0.447939867307014	0	0.231049060186648	1.4522362755632	2.79645327330212	3.02123598100039	2.1264349781725	0	0.597253156409352	0.462098120373297	0.366204096222703	0.693147180559945	0	1.57283295709836	0.354986664255429	269.948205346972
WYM32	1.46305061994362	4.01190268377568	0.648636716351771	0.621226662447	1.44518587894808	0.366204096222703	0.462098120373297	4.33223043498923	1.05935127678265	3.64140693105299	2.54816899215018	0.231049060186648	2.72621292953023	0.366204096222703	2.89547650288718	0.677012550275553	0.963457252632055	5.04534935202315	1.52292203511558	324.21631929136
WYM34	2.51640160050314	4.93963073577356	0	0.895879734614028	0.659764332403815	0.462098120373297	0.924196240746594	1.42555537300535	0.5364793041447	4.47476965884673	1.68345126107908	1.38629436111989	2.77128408913274	0.366204096222703	4.39995253656737	0	0.231049060186648	4.32199206615879	0.831015879994743	313.317636638556
WYM35	0.346573590279973	3.79348244243239	0	1.02358614055553	0.173286795139986	0	1.38104490879718	0.5364793041447	0.767528364331349	4.24018369002003	1.98912337459414	0.231049060186648	1.26139654463942	0.231049060186648	2.86766794927645	1.00633792268379	0.231049060186648	1.93903705332107	2.60289803005057	249.982257140661
WYM36	0.173286795139986	4.51640950781124	0.366204096222703	0.934417404570842	0	0	0.597253156409352	0.693147180559945	1.13373246055405	4.34738397764023	1.40947380829222	0	2.81872282985949	0.828302216596	1.49993655677676	0	0	1.92277366526459	0.626003804953412	237.807859973616
WYM37	0	5.35645353595861	0	0.346573590279973	0.173286795139986	0.231049060186648	1.49244560482607	2.92425506998326	2.66912235599444	3.00390572580608	1.6534757019819	0	3.13010862299086	0.732408192445407	5.3429285447064	0.447939867307014	0	0.902683400367403	1.54884729843592	280.803174050436
WYM38	0	4.50588277037524	0	1.10770419971083	0	0	0.231049060186648	0.597253156409352	0.231049060186648	1.28444140443149	1.43935716800028	0	0.462098120373297	0.693147180559945	1.7309856169634	0.274653072167027	0	0.732408192445407	1.54963319445601	181.397260838617
WYM40	1.88687542070374	4.57662494759276	0.231049060186648	0	1.0891772066724	0.231049060186648	1.52144939715595	1.05935127678265	0.963457252632055	3.23738134618375	1.61112552170673	1.80536680073481	1.69172460507794	0.963457252632055	5.75831712524263	0.794513457586986	0.231049060186648	4.22314307735137	0.377008189945037	329.244324043312
WYM41	0.274653072167027	4.65624469598305	0	1.04741368550661	0	0.5364793041447	1.52144939715595	0.924196240746594	2.5451012954198	3.37783855240711	2.79913773379016	0.924196240746594	0.597253156409352	0.998577424517997	4.93355357080716	0.621226662447	0.366204096222703	3.42547648964624	0.476029215739315	354.517552619327
WYM42	0.173286795139986	4.31344515499866	0	0.274653072167027	0	0	0.366204096222703	0.648636716351771	0.828302216596	3.64307565971028	1.8007800280736	0	0.693147180559945	0.828302216596	2.09718971318611	0.173286795139986	0.231049060186648	1.49993655677676	0.709973328510857	248.871235058008
WYM43	0.346573590279973	4.66465463972318	0	0.621226662447	0	0.231049060186648	1.2904003369693	1.42555537300535	0.924196240746594	2.66644513272866	1.26023987695883	0	0.597253156409352	0.924196240746594	2.56947022241912	0	0.597253156409352	0.902683400367403	2.11582332724025	224.59045584866
WYM44	0.173286795139986	3.89089224875481	0	0	0.693147180559945	0	0.828302216596	0.231049060186648	0.924196240746594	2.09660112088489	2.06067123470389	0	2.2040136782777	0.828302216596	2.41283228029812	0.173286795139986	0	1.4391627045121	0.354986664255429	234.807118759212
WYT01	1.31043675376491	4.65015985740071	0.231049060186648	0.274653072167027	0.549306144334055	0.231049060186648	0	1.88765349337865	0.87968577653842	4.12861018278025	1.73021058833029	0.231049060186648	1.98005708424014	0	0.231049060186648	0.173286795139986	0.231049060186648	2.7035758609915	1.78463090324721	265.937006185205
WYT02	0.922219863528484	4.60860881569287	0.462098120373297	1.02358614055553	0.447939867307014	0.366204096222703	0	1.97829806520653	3.28849137011264	3.59171400775002	1.27330986133062	0.693147180559945	2.80305414906751	0	1.05935127678265	0.173286795139986	0	3.31551568066552	2.00823887358775	268.037073537253
WYT03	0.274653072167027	3.67827499134973	0.231049060186648	0.850299345415539	0.621226662447	0.231049060186648	0	2.1930837373367	0.963457252632055	1.6400496018492	1.9645171079361	0.597253156409352	1.76610578884935	0	0.693147180559945	0.895879734614027	0	4.8408035770254	1.03891405608144	244.602428803628
WYT04	0.173286795139986	4.81478493319231	0.231049060186648	1.03972077083992	0.173286795139986	2.53629020973042	0	2.01341823709247	0.597253156409352	3.0259754389772	1.90066578623381	0	1.49993655677676	0	0.963457252632055	0.274653072167027	0	2.2805384921592	1.19585866874831	243.508254782242
WYT05	1.69948510324373	4.73430153373606	0	0.549306144334055	1.32457934163701	0	0	3.90291845726299	0.366204096222703	4.28071652303178	1.49051644594411	1.80536680073481	3.18688168963569	0	2.19859350465377	0.659764332403815	0	1.78236917690582	0.912411331337521	302.165005961938
WYT06	0.274653072167027	4.67691243240259	0.366204096222703	0.346573590279973	0.346573590279973	0.231049060186648	0	3.49941661039156	1.05935127678265	4.7270262383853	1.462582205135	0.231049060186648	2.09718971318611	0	0.462098120373297	0.173286795139986	0.231049060186648	1.18511602049647	1.00440821087373	257.004496051034
WYT07	0.447939867307014	4.7827507720022	0.366204096222703	0.274653072167027	0.274653072167027	0.462098120373297	0	1.39655158067548	0.902683400367403	4.67286413352831	1.58195815968947	0.231049060186648	2.80305414906751	0	0.5364793041447	0	0	1.57283295709836	1.04943002998761	254.148922845366
WYT08	0.346573590279973	3.90374704570285	0.366204096222703	0.274653072167027	0.621226662447	0	0.231049060186648	1.61734342130654	0.767528364331349	4.66184870534031	1.44923382386637	0	0.732408192445407	0	0.462098120373297	0	0	1.52144939715595	0.78705547666114	198.880970650711
WYT09	0.772760613339579	3.18941294700764	0.597253156409352	0.722592939474041	0	0.693147180559945	0.366204096222703	1.44357778009544	0.693147180559945	2.24727919508237	2.05450278651871	0	1.826879641114	0	1.76275567689818	0.173286795139986	0	8.24139834578407	0.968884579429542	248.737653662513
WYT10	1.242453324894	5.05687320631253	2.48874251873849	0.173286795139986	0	1.55132011671917	0	3.06337922155289	1.15524530093324	4.12394918648194	1.42781006414012	0.767528364331349	2.04518829702725	0	2.17008611350772	0.447939867307014	0.597253156409352	2.31565866404514	1.03891405608144	277.172987438564
WYT100	1.45870268426565	4.48415714187242	4.85556358992494	1.4341430743698	0.772760613339579	0.767528364331349	0.462098120373297	1.11073483672507	0.231049060186648	4.46416075877257	2.26993636728837	0.597253156409352	0.963457252632055	1.05935127678265	2.7295630414814	0.722592939474041	0.597253156409352	3.68168784687878	0.652049741638262	355.73412791694
WYT101	0.173286795139986	2.90181721249899	0.462098120373297	1.48766063814693	0.173286795139986	0.231049060186648	0	0.963457252632055	0	3.13129582461656	1.40790086907464	0.231049060186648	0.231049060186648	0.597253156409352	0.597253156409352	0	0.231049060186648	0	1.16248511857952	153.695614684199
WYT102	0	3.02760316309639	0.231049060186648	0.402359478108525	0	0.231049060186648	0.231049060186648	1.3647815207407	0.231049060186648	3.60870231228994	0.902317909126404	0.231049060186648	0.366204096222703	1.26888749659011	0.767528364331349	0.575646273248511	0	1.2904003369693	1.28459776602472	193.963713722593
WYT103	0	4.27296416043137	0.732408192445407	0.173286795139986	0.621226662447	3.97386182132497	0	5.76488949369855	1.826879641114	3.95498775180166	2.54327403094937	0.462098120373297	2.08460960385849	1.2904003369693	3.93860871490752	0.447939867307014	0	4.12153789121958	0.796564157592331	325.346646846256
WYT104	0.173286795139986	2.80919260314259	0.231049060186648	0.833051127543801	0.346573590279973	0.693147180559945	0.231049060186648	1.52144939715595	0.462098120373297	4.26011910630717	2.04628598957171	0.231049060186648	0.462098120373297	1.39655158067548	0.597253156409352	0.346573590279973	0	2.63218423388101	0.412910251128023	235.645907157263
WYT105	0.173286795139986	4.77203001813375	0.462098120373297	0.772760613339579	0.173286795139986	0.366204096222703	0	0.963457252632055	0.366204096222703	2.73639198367754	1.80997423135736	0.231049060186648	0.366204096222703	1.656604433192	2.50292905687809	0.173286795139986	0	4.77071830033947	0.584906366031729	264.01745639209
WYT106	0.833051127543801	3.91854096827206	0.597253156409352	1.47152600786254	0.173286795139986	0	0	0.5364793041447	0	3.5612561329792	1.87488609457955	0	0.462098120373297	1.2904003369693	0.828302216596	0.402359478108525	0.231049060186648	1.42555537300535	0.454007690049706	224.393277737345
WYT107	1.84939038388101	4.24833203282352	0.231049060186648	0.895879734614027	0.173286795139986	0.828302216596	0	1.62760064086212	0.366204096222703	3.93676225978196	1.45323647176181	0	1.05935127678265	1.42555537300535	1.98354751752924	0.659764332403815	0	4.18547085517034	0.652049741638262	256.457293083641
WYT108	0.447939867307014	3.87856116940544	0.5364793041447	0.402359478108525	0.173286795139986	0.231049060186648	0	1.01484081257447	0.767528364331349	2.96946884577579	1.51336542373395	0	0.462098120373297	0.924196240746594	0.924196240746594	0.519860385419959	0	1.47693893294777	1.39300506133492	227.882649729175
WYT109	0	4.18469869122318	0	1.02358614055553	0.173286795139986	0	0	1.13373246055405	0.5364793041447	3.0361232186225	2.3177277741415	0.231049060186648	0.462098120373297	0.998577424517997	3.59876830940821	0.346573590279973	0.366204096222703	2.27623735721389	1.37698153614505	278.926306080583
WYT110	0.173286795139986	3.74913165703438	0.462098120373297	0.447939867307014	0	0.87968577653842	0	1.47693893294777	0.231049060186648	3.94802112558249	3.06372253310559	0.693147180559945	0.5364793041447	1.46067554489129	6.46340447678069	0.95166562244258	0	5.47965560711696	1.5987631201204	333.932953872525
WYT111	0.173286795139986	4.72325375999263	0.462098120373297	1.06916652975401	0	0.231049060186648	0	1.56071040904141	1.03034748445277	3.94910833965997	1.92842251244962	0.231049060186648	1.05935127678265	0.597253156409352	3.15240014996924	0.447939867307014	0.366204096222703	4.64904270679451	0.62238697524137	274.69001061088
WYT112	0.346573590279973	4.8682418670575	1.47693893294777	1.88342342746216	0	0	0.231049060186648	1.4522362755632	0.693147180559945	3.67330639154704	1.32631501644609	0	0	1.05935127678265	0	0.173286795139986	0	4.76434320847451	0.632973828406188	241.611416732669
WYT113	0	3.76499117642606	2.92856414815041	1.3701597308355	0.346573590279973	0.366204096222703	0.231049060186648	0.828302216596	0.462098120373297	3.78181523407574	2.31818610476701	0.462098120373297	0.462098120373297	1.34178389691172	1.13373246055405	0	0	1.89452658911289	0.575050241533593	283.791729791706
WYT114	0.173286795139986	4.60272550091778	0	0	0.173286795139986	0.231049060186648	0	0.902683400367403	0.462098120373297	2.99967820271583	1.75641246154366	0.231049060186648	0.693147180559945	1.05935127678265	1.99042061326349	0.173286795139986	0	0.828302216596	1.92888437518818	214.177690911095
WYT115	0	2.70916020666067	0	0.722592939474041	0.346573590279973	0.231049060186648	0.231049060186648	0.597253156409352	0.462098120373297	3.16208113115805	2.27007621208377	0.231049060186648	0.231049060186648	1.75249845734259	1.22962648470465	0.549306144334055	0	1.3647815207407	0.901935435182442	212.526080302797
WYT13	2.26371386728395	4.87300274275185	0	0.575646273248511	0.346573590279973	0.231049060186648	0.462098120373297	4.16643144862374	2.2476268785973	4.41166343328041	1.48876214335935	0	2.01736305630814	0	1.08603217934049	0.346573590279973	0.366204096222703	4.46221117228182	0.845556264896164	302.119037622869
WYT14	3.19372008595862	4.97828353820069	0.597253156409352	0.173286795139986	0	0.597253156409352	0.597253156409352	4.40160679968141	2.58894684569517	3.97635673732802	1.67969830182187	0.231049060186648	2.13891076083744	0	1.98354751752924	0.447939867307014	0.231049060186648	3.96203842817553	1.42216154081257	327.855046354725
WYT15	1.22070048064659	4.86510879781128	0.902683400367403	0.659764332403815	0.519860385419959	2.43439001707893	0.87968577653842	5.48663444765839	4.73263178434278	4.11083091159276	1.74401513587194	0	2.03493107747166	0	2.5773102406495	0.794513457586986	0	2.53859702401194	1.52686768477326	350.142444550675
WYT16	0	3.68647307992745	1.05935127678265	0.346573590279973	0.519860385419959	0	0	4.72572242408437	2.03343965067335	4.32172419701961	1.41845404354776	0.998577424517997	2.16958971232389	0	0.693147180559945	0	1.05935127678265	2.66878918921675	0.800828866613714	245.448097036108
WYT17	1.68335047295934	3.75727390785068	1.3647815207407	2.14344063572603	0.850299345415539	1.24588987276112	0.732408192445407	3.87350782518942	1.05935127678265	4.04189726610896	1.40723726305953	1.54165760442809	5.92884144137522	1.30400766847605	3.55113102230489	1.06916652975401	0	3.57720086450219	1.6221439569391	376.62693941686
WYT19	0.519860385419959	3.9715329499207	0.767528364331349	0.274653072167027	0.173286795139986	0.462098120373297	0	2.15796356545076	0.828302216596	4.10439957157927	1.16818832362931	0.462098120373297	1.13373246055405	1.57283295709836	0.597253156409352	0.173286795139986	0.231049060186648	4.24144352703782	0.62238697524137	236.951203426781
WYT20	1.15624320332107	4.15672686129521	0.366204096222703	0.173286795139986	0.447939867307014	3.69384232494519	0.231049060186648	2.40873633670022	2.86496489969336	4.71965213784581	1.30120280524489	0.902683400367403	2.6467425883819	1.64721414086977	1.05935127678265	0	0.963457252632055	4.40318019132615	0.953508770259204	308.756958489588
WYT21	0.794513457586986	3.86773991922403	0.732408192445407	0.173286795139986	1.4341430743698	1.56071040904141	0.366204096222703	4.93876169171929	3.18676425671803	4.41842974390457	1.84559829711937	2.84448672129337	3.7604362054838	1.75249845734259	2.04374216316105	0.621226662447	0.366204096222703	4.8782632745556	2.07276250106128	348.464167588069
WYT22	1.2130075659799	3.2863351465057	0.366204096222703	0.346573590279973	0.722592939474041	2.54510129541981	0	4.55107563163561	3.89278505136465	4.38962601585993	1.5339496523412	1.87826320105642	4.2333964837443	1.52144939715595	1.01484081257447	0.722592939474041	0	3.85688864386893	1.99260308774356	315.836787339639
WYT23	0.447939867307014	4.07978032713565	0.597253156409352	0.346573590279973	0.922219863528484	4.37773348123475	0.597253156409352	6.01409460168404	3.99447632308587	4.26760689969872	1.64913514468964	2.08460960385849	3.41691947213319	1.656604433192	1.49244560482607	0.621226662447	0	4.58916536428751	1.54634393611342	331.598117610896
WYT24	0.519860385419959	4.40295962895442	0.231049060186648	0.447939867307014	0.748933068388498	1.826879641114	0.963457252632055	4.84122415048045	1.91752421294188	4.65759358529435	1.67951039285165	0.366204096222703	3.2230943512875	1.34178389691172	1.11073483672507	0.575646273248511	0	2.96337836927295	1.14743361634269	304.620426605056
WYT25	4.62134054496928	3.88875944111461	0	1.47152600786254	0	0	0	0.998577424517997	0.828302216596	4.26346869133618	2.25781019296183	0.597253156409352	0.693147180559945	0	2.04374216316105	0.823959216501082	0	1.77270666461474	0.54059851913118	260.730400907641
WYT26	3.99522338236108	4.02341735182342	0.231049060186648	0.621226662447	0.173286795139986	0	0.231049060186648	0.231049060186648	0.231049060186648	3.96674580928363	1.238880924029	0.231049060186648	3.18957129085017	1.41616508068312	1.90347567245829	0.519860385419959	0.366204096222703	4.92021845926926	2.12292412475668	281.728118709952
WYT27	2.50442717415654	4.13950927229997	0	0.794513457586986	0	1.01484081257447	0.5364793041447	2.1383656530572	0.828302216596	4.9384901207023	1.53878472241354	0.366204096222703	2.20934712539318	0	0	0.447939867307014	0	2.7295630414814	0.454007690049707	250.067501533196
WYT28	0.173286795139986	4.48762522567144	0.648636716351771	0.621226662447	0.173286795139986	0.231049060186648	0	1.26139654463942	1.03034748445277	4.21550883217526	1.65642453830068	0	0.597253156409352	0	0	0	0.767528364331349	4.62352477837977	1.70090257026345	235.031528154944
WYT29	1.00183329630812	4.12766008339023	0	1.34381960192104	0	0	0.231049060186648	3.41169693734861	0.963457252632055	4.28401464988278	1.49071542732836	0.998577424517997	3.55511474370107	0	2.49102302934407	0.173286795139986	0.231049060186648	4.53994663234174	0.558860429346878	292.647965947233
WYT30	0	3.67660883264076	0	1.29262099875954	0.902729478161056	2.54989754123717	0.231049060186648	0.231049060186648	1.2904003369693	2.87157523408178	2.60390965543682	0.693147180559945	1.64958663012606	0.828302216596	2.1372727559033	0.575646273248511	0.693147180559945	4.72720364751672	0.62238697524137	281.222371465656
WYT31	0.173286795139986	3.77800577482696	0	0.447939867307014	0	4.90209906936533	0.462098120373297	3.73596458472778	0.767528364331349	4.37081893251623	1.35224207007808	0	3.95657513369904	0	3.5982218611984	0.346573590279973	0	4.12019108804057	0.73368549100718	276.770625937156
WYT32	0.621226662447	2.03136730250883	0	0.173286795139986	0	1.79175946922806	0.462098120373297	2.07419208935712	0.693147180559945	3.90667371355432	1.67188440139035	0.231049060186648	1.42555537300535	0.231049060186648	0.767528364331349	0.850299345415539	0.231049060186648	2.68505257727323	0.553028715843984	250.131271822472
WYT33	0.575646273248511	4.13362356805145	0	1.29823921272255	0.346573590279973	0	0.231049060186648	0.462098120373297	1.1945063128187	3.96044218270475	1.73009834789744	1.98614156434326	2.81666148057426	0	0.231049060186648	0.519860385419959	0	3.3472857406003	0.441577493336902	272.699772766082
WYT34	0.850299345415539	3.74003550007533	0	0.402359478108525	1.7424476674754	0	0	3.3325687425917	0.597253156409352	4.93747898199849	1.23720771799074	1.56071040904141	3.82410045584457	0	1.4522362755632	0	0.231049060186648	4.98387685165626	0.652049741638262	299.603829173052
WYT36	1.52619830810375	3.88136445907353	0	0	0.173286795139986	3.93740497015458	0.693147180559945	1.34178389691172	1.22962648470465	3.79098848639384	1.35460084057701	0.231049060186648	2.12557564929954	0	1.24588987276112	0.173286795139986	0.366204096222703	2.5561870360053	1.29487969454259	250.235315664699
WYT37	0.486477537263828	4.60919376199563	0	0.173286795139986	0	0.597253156409352	1.25373337189785	1.16550252048883	0.828302216596	3.18071848366785	1.57971759539728	0.902683400367403	2.50017649513177	0	0	0.402359478108525	0.693147180559945	1.70798799313442	0.668875889589174	242.926320256604
WYT38	1.28099099485081	4.54397031669219	0	0.967800252726973	0	0.231049060186648	0.462098120373297	1.66347752892625	0.231049060186648	3.65676448128169	1.67711393112311	0.231049060186648	1.32966134885476	0.231049060186648	1.03034748445277	0.761130609430856	0.462098120373297	4.16028647666541	1.62043234688212	266.494492319495
WYT39	0.173286795139986	4.24787905244647	0	0.922219863528484	0.173286795139986	1.77917935990044	0	3.29485318088354	0.231049060186648	3.71688909023719	1.67407942858673	0	3.46638630951015	0	1.01484081257447	0.346573590279973	0	4.81735135104897	0.610952302716579	265.661797662079
WYT40	0.173286795139986	3.78918584134017	0	0.447939867307014	0	0	0	2.73697991112634	0.462098120373297	4.09756182505954	1.34688327452882	0	4.16640285622147	0	0.597253156409352	0.173286795139986	0	4.90322271633465	0.776868472703313	241.11372555088
WYT41	0.173286795139986	5.09866139288151	0.231049060186648	0.447939867307014	0.346573590279973	0.462098120373297	0.231049060186648	2.28372830916458	0.366204096222703	4.09713755372032	1.62955049297052	0.366204096222703	3.66704423567134	0	1.08603217934049	0.850299345415539	0	4.40711560085832	0.610952302716579	308.785037287593
WYT42	0.549306144334055	3.97227366750699	0.231049060186648	0.621226662447	0.274653072167027	0.462098120373297	0.366204096222703	3.68981563822128	0.693147180559945	3.85755009219273	1.06995722460111	0.998577424517997	3.98697969210812	0.231049060186648	0.231049060186648	0.274653072167027	0	2.70055924915152	0.59634103855652	239.525202538671
WYT43	1.63777008376085	3.96307235836585	0	0.934417404570842	0.402359478108525	0	0.231049060186648	3.047496568356	1.1945063128187	4.36266350251056	1.51397121906219	2.71304955962802	0.462098120373297	0	0	0.173286795139986	0.462098120373297	2.1187025535653	0.767896915383452	239.785177675828
WYT44	0.173286795139986	3.9206310923644	0	0.519860385419959	0	0	0	0.767528364331349	1.826879641114	3.86645075388208	1.33823312935012	0.462098120373297	1.0729586082894	0	0	0.346573590279973	0.5364793041447	4.33877569263349	1.91198477826784	227.50266389727
WYT45	0.693147180559945	3.71121527107233	0	0.173286795139986	0	0	0.231049060186648	1.86614065299946	4.84196215598338	4.83172534710143	1.17090322044791	0.231049060186648	0.767528364331349	0	0	1.07937202838408	0	3.30149568428974	0.703893383593886	231.164645618021
WYT46	0.173286795139986	4.32289828240162	0	0.621226662447	0.173286795139986	0.828302216596	0	5.02214966863031	0.998577424517997	3.94321818703806	2.16124877505852	0.231049060186648	2.1930837373367	0	0	0.447939867307014	0	3.86790545241729	2.24804634470869	265.348556672076
WYT47	0	1.95306550913735	0.231049060186648	0.173286795139986	0.519860385419959	0.231049060186648	0	1.3647815207407	1.65428154341997	4.22573231718057	1.05295702695489	0	0.693147180559945	0	0	0.274653072167027	0	1.01484081257447	0.731994854200466	164.889023384098
WYT48	1.61847267408807	3.78897854807675	0	0	2.03148170067697	0.597253156409352	0.366204096222703	0.902683400367403	4.53791397555259	4.92906670227524	1.35125779776757	0	0.693147180559945	0	0.462098120373297	0.447939867307014	0.854983119153846	2.12952046851521	0.690897415278783	251.239646858
WYT49	0.274653072167027	3.80712964175968	0.5364793041447	0.346573590279973	0.519860385419959	1.01484081257447	1.74724900501988	1.82409022455716	0.366204096222703	4.38824945230215	2.2436462280631	0	1.61734342130654	0.693147180559945	0.944404448018739	0.346573590279973	0	6.3731461652602	0.955834611059795	320.23337833788
WYT50	3.1151302616682	4.55164234665254	0	0.519860385419959	0.967800252726973	0	0.231049060186648	2.10511933384078	0.648636716351771	4.17541674744601	1.88370914049519	0.462098120373297	2.69382501337902	0	2.10269948050318	0.447939867307014	0	5.11857452399842	0.898795591365474	295.024344535965
WYT51	0.519860385419959	4.73171372068775	0	0.173286795139986	0	0.231049060186648	0.366204096222703	1.3647815207407	0.231049060186648	4.66509498462723	1.40982993461189	0.231049060186648	2.42413279752335	0	1.61209396898383	0.274653072167027	0.5364793041447	5.51604889976696	1.69416428471916	258.806693350489
WYT52	1.17053280678105	4.47741851278282	0	0.274653072167027	0.274653072167027	0	0.462098120373297	1.30400766847605	0.5364793041447	4.64769412025062	1.5501315757895	0	3.49351675135842	0	0.366204096222703	0.346573590279973	0	5.11674164140081	1.10456153170693	256.809051888716
WYT53	3.76318059363378	4.73531915524195	0	0.346573590279973	0	0.231049060186648	0.231049060186648	0.693147180559945	1.15524530093324	3.57511945797262	1.93485098521294	0.231049060186648	2.29414582366595	0	2.88623091789665	0.173286795139986	0.231049060186648	3.0957671377041	3.04172879744949	307.367742026567
WYT54	1.62756458513079	4.48567269700224	0	0.173286795139986	0.866433975699932	0.231049060186648	0.231049060186648	2.01182714417492	1.2904003369693	4.56353672241484	1.14935069005467	0.366204096222703	3.82147608596156	0	1.15524530093324	0.519860385419959	0.366204096222703	4.5493362152562	0.652049741638262	293.295919457228
WYT55	0.447939867307014	4.46835524306415	0	0.447939867307014	0.173286795139986	0.366204096222703	0	1.95643230437793	2.52175842729964	4.90140318065113	1.54193923806057	1.1945063128187	1.8184403717859	0	1.2762137988297	0.173286795139986	1.29727343270354	2.03641586092146	0.575050241533593	270.942725835471
WYT56	1.62756458513079	3.77103450711556	0	0.693147180559945	0.173286795139986	0.462098120373297	0.462098120373297	4.31463146330862	1.89110775572383	4.40430595495366	1.5732376935551	0.231049060186648	3.75761730214439	0	1.76275567689818	1.03578368159788	0	1.05935127678265	0.564463388368775	254.562617964867
WYT57	1.54344652597548	3.33330668417941	0	1.00633792268379	0.173286795139986	1.58739131159925	4.09138392211359	0.231049060186648	0.231049060186648	3.58706372596718	3.09677992164455	0	1.13373246055405	0.231049060186648	1.8184403717859	0.173286795139986	0	1.75249845734259	1.27428401013836	316.6957179917
WYT58	0	3.9513999383166	0	1.40869740079231	0	0	0.597253156409352	0.366204096222703	1.56071040904141	5.57709223992	1.37395451392034	0	1.3647815207407	0.597253156409352	1.05935127678265	0.519860385419959	1.0729586082894	3.93103062179345	0.354986664255429	246.804796462304
WYT59	2.39540700707069	3.58768340952952	0	0.173286795139986	0.173286795139986	0	0.231049060186648	0.597253156409352	1.42555537300535	5.21197243544666	1.11476120629969	0	2.4565335735088	0.693147180559945	1.32966134885476	0.549306144334055	0.231049060186648	5.44415601597247	0.558860429346878	242.325349044454
WYT60	0.173286795139986	4.30761496745059	0	1.14108704786696	1.02358614055553	0.998577424517997	1.24588987276112	3.27481478173189	1.2904003369693	4.30082723535597	2.42650093786478	0.693147180559945	4.78734356170233	0.462098120373297	2.19122672232022	0.519860385419959	0.231049060186648	1.99042061326349	0.441577493336902	293.786525417562
WYT61	0.274653072167027	4.10685600298413	0	0.173286795139986	2.10975385258805	3.46650811960956	0.693147180559945	5.12418092268025	2.15225655185739	4.6068143211274	2.05157192750487	1.52832249289019	4.21580652184203	0.732408192445407	0.597253156409352	0	0	2.55179688160872	0.77051822090748	346.531521717074
WYT62	0.173286795139986	1.5666861092539	0	0.823959216501082	0	0	5.64424106712686	0.231049060186648	0.231049060186648	1.25145009967382	2.00171142553336	0	0.924196240746594	0.366204096222703	0.648636716351771	0.748933068388498	0	1.38104490879718	0.54059851913118	181.5384516438
WYT64	0.814524134505371	2.28030743901234	0	1.47152600786254	0	0.462098120373297	0.462098120373297	0.231049060186648	0.231049060186648	2.94821006091455	2.33264524664475	0	0.597253156409352	0.462098120373297	0.597253156409352	0.486477537263828	0.648636716351771	1.1945063128187	0.441577493336902	198.854621717561
WYT65	0.173286795139986	3.45842012695199	0	0	1.3307524947846	0.597253156409352	0	0.231049060186648	0.828302216596	2.21896733663568	2.32189702379838	0.693147180559945	0	0.924196240746594	0	0.823959216501082	0	3.79192919225053	2.37407609997947	220.533751332554
WYT66	0	2.55462703440412	4.88489795666315	1.26879345380846	0	0.693147180559945	1.73466889569227	1.7309856169634	0.366204096222703	2.93559703830112	2.15842407548029	1.0729586082894	0.366204096222703	0.828302216596	0.462098120373297	0	0.799298424266124	1.61209396898383	0.511931276922301	315.043329059952
WYT67	0.575646273248511	3.67366984157684	0	0.173286795139986	2.02947723559579	0.462098120373297	0	2.8751697782999	0.462098120373297	4.13126107997136	1.61957125133117	0.366204096222703	3.45799701894117	1.30400766847605	1.44357778009544	0	0	4.29064361528415	0.814826067808029	258.239500865231
WYT69	0.173286795139986	2.95276528634013	0.231049060186648	0.173286795139986	0	0.231049060186648	0	1.93903705332107	0.597253156409352	3.6216674398936	1.78299000515156	0	0	0.998577424517997	0.944404448018739	0	0.462098120373297	2.06206954130016	0.584906366031729	211.682582318551
WYT71	0.641237339365384	4.75410711827848	0.462098120373297	0	1.29262099875954	0.366204096222703	1.61734342130654	2.30656128328247	0.597253156409352	4.36901136780697	1.64855643685134	0.902683400367403	2.88623091789665	0	2.69751508796377	1.03972077083992	0	1.88416306008955	0.895585183386609	295.458766840224
WYT72	0.173286795139986	3.89772571212234	0.597253156409352	0	0	0	1.01484081257447	0.693147180559945	0.597253156409352	4.28714716189324	1.09736735606429	0.231049060186648	0.902683400367403	0	0.597253156409352	0.967800252726973	0.231049060186648	3.70459179169828	1.83646684836585	231.736172244515
WYT73	4.50213625919652	3.20339957652862	0.597253156409352	0.346573590279973	0	0.231049060186648	0.462098120373297	1.13373246055405	1.05935127678265	3.76962249638717	1.35827837182844	1.44793514061789	1.59583058092735	0	4.80017631676289	0.693147180559945	0.462098120373297	4.53112216899438	1.20637464265449	277.791217742048
WYT74	0.173286795139986	3.42810281347619	0.231049060186648	0	1.68215715327118	0	0.231049060186648	2.76234167505502	0	3.8994992118556	1.77295468827625	0.597253156409352	4.44852790858986	0	0.998577424517997	0.346573590279973	0	1.87826320105642	0.789918441073061	224.810328954644
WYT75	0.173286795139986	1.94395413423056	0.231049060186648	0.967800252726973	1.18839754777659	0.998577424517997	0.462098120373297	0.597253156409352	1.1945063128187	4.04597753509721	2.28023095629191	0.231049060186648	0.87968577653842	0.597253156409352	2.5873902023794	0.173286795139986	0	3.25913799842692	0.671497195113202	256.78457008887
WYT76	0	3.43421744417257	0	0.274653072167027	1.06916652975401	0	0.231049060186648	1.61734342130654	0.231049060186648	4.16082528128903	1.5578910085357	0	5.50258584781693	0	0.462098120373297	0.346573590279973	0	1.87826320105642	0.575050241533593	236.697247260878
WYT77	0.575646273248511	4.63376814792805	0.231049060186648	0.486477537263828	0.934417404570842	0.231049060186648	0.767528364331349	4.22015163129098	2.55179688160872	4.13431624549529	2.26043519396224	1.56682678859747	4.81206127173354	0.597253156409352	5.10720123317967	0.895879734614027	0	4.12678734354229	2.42134499844513	370.164244951046
WYT78	0.274653072167027	3.8625052935721	0	0.346573590279973	1.27496660695605	1.95264438482782	0.231049060186648	1.79175946922806	0.828302216596	4.33749772772885	1.48648278837301	0	2.83205794139739	0	5.02929708757165	0.693147180559945	0	1.59583058092735	0.476029215739315	259.742746653942
WYT79	0.274653072167027	4.03952119474284	0.231049060186648	0.274653072167027	1.43575079695237	0.231049060186648	0.231049060186648	2.75930675272405	0.231049060186648	4.08227232343562	1.28947321950327	0	1.05935127678265	0	5.46289003975814	0.173286795139986	0	2.38668973586538	0.584906366031729	249.585474805134
WYT80	0.519860385419959	2.91770803619215	0.231049060186648	0.519860385419959	0.173286795139986	0	0.828302216596	0.924196240746594	0	3.83887710348985	1.5105356521796	0	0.924196240746594	0	1.09861228866811	0.346573590279973	0	1.05935127678265	0.610952302716579	193.309852040436
WYT81	2.03522461515196	5.0647070217387	0.231049060186648	0.967800252726973	0.621226662447	0.597253156409352	0.732408192445407	0.963457252632055	1.47693893294777	3.81973527767064	1.99309448874077	0.366204096222703	1.656604433192	0	3.32681619789075	0	0.231049060186648	4.98238593356619	2.30691952449417	326.577020067353
WYT82	1.0151107526366	5.21503707921709	0	0.274653072167027	0.173286795139986	0.87968577653842	1.05935127678265	0.693147180559945	0.366204096222703	3.90098764773353	2.28992435971459	0.854983119153846	2.81112556844104	0	4.96602898542233	0.173286795139986	0.462098120373297	5.07051907017561	0.690897415278783	305.020145829895
WYT83	1.13044714426226	4.26379753312708	0.231049060186648	0.173286795139986	0.173286795139986	0.462098120373297	0.231049060186648	2.4609154832463	2.00211771986724	4.21164034264648	1.75402900364824	1.12243194332882	1.67021176469875	0	4.54869910969034	0.173286795139986	0.799298424266124	5.354575913347	1.52416306055469	281.961492943288
WYT84	0.346573590279973	3.14830401477046	0.597253156409352	0.748933068388498	2.83257496548973	0.693147180559945	0.231049060186648	3.29210729482112	0.597253156409352	4.17694650963153	1.83411156097754	1.6424178950524	2.67864212329726	0	2.27623735721389	1.19687293569551	0.231049060186648	5.17439678285746	0.913847093602307	286.568065553464
WYT85	0.575646273248511	2.20126273876413	0.462098120373297	1.01076281695864	1.32206675767363	0.732408192445407	0.963457252632055	2.15382272545124	1.11073483672507	3.25478988198491	2.37455615069677	0.231049060186648	1.11073483672507	0	2.10087299191497	0.346573590279973	0	2.55696494378737	0.657881455141156	259.400265441807
WYT86	0.748933068388498	4.18540164015928	0.231049060186648	1.09550665866847	0.402359478108525	0.828302216596	0.828302216596	3.1066970786451	0	3.43521734871474	2.41292072950161	2.0086219912751	1.0729586082894	0	2.34975161375195	0.447939867307014	0	4.55309257064423	1.42471623074068	317.701106273092
WYT88	0.346573590279973	2.41749862739235	0.5364793041447	0	0.274653072167027	0.231049060186648	0.462098120373297	0.767528364331349	0.597253156409352	3.06990986769123	1.77115645965124	0.231049060186648	1.13373246055405	0	1.05935127678265	0	0	0.87968577653842	0.705948917515615	179.85273478079
WYT89	0.173286795139986	2.31270612792435	0.767528364331349	1.29823921272255	0.346573590279973	0	0.462098120373297	1.05935127678265	0.462098120373297	3.351335400242	2.74635689320615	0.231049060186648	0.902683400367403	0	1.24588987276112	1.84537547362668	0	1.2904003369693	0.526982779159134	235.171427675955
WYT90	0.274653072167027	3.64946921413461	0.366204096222703	1.17053280678105	0.80471895621705	0	0.231049060186648	0.998577424517997	0.231049060186648	3.10067298829568	2.07073586905573	0	0.693147180559945	0	1.70798799313442	0.748933068388498	0	1.63509159281281	0.602786815025158	232.772765713995
WYT91	0.274653072167027	3.99949695636213	0.597253156409352	0.575646273248511	0.173286795139986	0.693147180559945	0.732408192445407	0.597253156409352	0.366204096222703	4.27003539608546	2.25949879494392	0	0.597253156409352	0	2.17598597254085	0.895879734614027	0	0.924196240746594	0.652049741638262	245.679021285679
WYT92	0.346573590279973	4.51124932159316	0	0.447939867307014	0	0.366204096222703	0.462098120373297	0.828302216596	0.462098120373297	4.63612849369637	2.29390369363902	0	0.732408192445407	0	0.767528364331349	0	0	4.76830042900338	1.80559327438162	250.795732377621
WYT93	0.274653072167027	1.92739010977172	4.18131820077151	0.447939867307014	0.274653072167027	0.231049060186648	0.693147180559945	0	0.231049060186648	4.29123506780742	1.7571431784948	0.231049060186648	0.693147180559945	0	0.693147180559945	1.14108704786696	0	1.13373246055405	0.62238697524137	234.428949435932
WYT96	0.346573590279973	3.40289960005026	0.231049060186648	0.447939867307014	0	0.924196240746594	0.231049060186648	1.47693893294777	0.767528364331349	3.40182747244914	2.32685205634762	0.231049060186648	0	0.963457252632055	1.22962648470465	0.447939867307014	0.462098120373297	3.06433024454702	0.434931776817632	257.848378045155
WYT97	0.173286795139986	4.0394812748761	0	1.00633792268379	0	0.462098120373297	0.231049060186648	0.597253156409352	0.693147180559945	2.88872925339363	1.47281471331271	0	0.693147180559945	1.08603217934049	0.828302216596	0	0	1.47693893294777	2.38974575550601	206.662428543952
WYT99	0	4.40572477105201	0.828302216596	1.4837235489049	0.621226662447	0.693147180559945	0	1.67021176469875	0.462098120373297	3.46263360949304	2.03535496117525	0	3.65271598455835	6.03021934147035	3.80236605790765	0	0	2.0228085294147	0.72502483074769	385.02744128035
