# Supplementary material for: Relationships between community composition, productivity and invasion resistance in semi-natural bacterial microcosms
Source: eLife. 2021 Oct 18;10:e71811. doi: 10.7554/eLife.71811 (PMC8523168; doi:10.7554/eLife.71811)
Supplement: Figure 3—source data 4. — Key column types are mgCO2 (milligrams of CO2 produced), CPM (cells per ml), ATP activity (nM ATP/ml), mG (mg/ml glucosidase), mN (mg/ml chitnase), mX (mg/ml xylosidase), mP (mg/ml phosphatase). Numbers in these column titles represent the day (7 or 14) when the measurement was taken. [file elife-71811-fig3-data4.csv]

Community	mgCO2.7	mgCO2.14	CPM7	CPM14	ATP7	ATP14	mG7	mG14	mN7	mN14	mX7	mX14	mP7	mP14
AE01	0.2566184345	0.27906771725	232750	256350	6507.35	5645.75	43.4	12.5	14.6	8.7	7.5	6	336.4	317.8
AE02	0.23089425275	0.1974256295	309050	238400	7378.95	6613.2	47.1	24.8	15.9	14.5	12.1	9.4	548.6	401.6
AE03	0.307076173	0.179648829	181850	117550	4401.2	3878.4	34.1	17.3	8	10.2	7.1	7	573.8	430.4
AE04	0.2533721475	0.20172849525	155450	258050	4515.4	3876.45	28.8	19.4	10.3	13.7	9	7.8	953.4	653.5
AE06	0.2572903045	0.13524341425	141750	130900	6383.65	4812.15	69.5	20.7	28.5	21.5	11.3	8	908.4	885.6
AE07	0.27522883625	0.18630383875	211050	161050	2329.35	2823.15	17.3	10.7	4.9	5.4	6.3	6.2	206	310.8
AE08	0.18468076675	0.11608323075	268200	170700	2936.15	5859.95	24.5	13	17.6	12.2	8.5	6.7	329.6	515
AE09	0.25874400475	0.194394621	259350	604650	4242.45	3329.8	34.7	16.3	7.7	7.1	7.2	6.7	375.2	341.2
AE10	0.23349589425	0.20300098675	269400	188300	6195.2	5606.8	77.2	90.6	6.8	7.4	26.7	28.2	377.4	353.6
AE102	0.4375	0.675	175950	138850	8852.2	7363.4	63.7	52.9	7	9.1	6.5	6.6	406.6	1614.2
AE104	0.5075	0.5875	130100	193700	9958.55	5824.1	82.9	43	4.9	5.4	6.5	6.4	767.7	1289.2
AE105	0.16425	0.50375	133850	105000	9344.25	3393.45	93.9	33.7	4.9	4.6	6.4	5.4	898.6	1049
AE106	0.10375	0.4785	3000	51850	6942.2	8344.9	10.1	15.5	4.9	5.3	5.6	6.1	96.3	263.1
AE108	0.10775	0.4015	36700	138450	11277.8	7528.95	31.6	28.5	5	5.9	6.3	6.9	626.5	1267.2
AE109	0.5075	0.49575	337050	278600	14.35	4204.8	4.7	15.3	4.5	5.9	5.4	6.3	49.9	271.4
AE11	0.24982101375	0.23093408375	105500	189800	12.7	5161.8	4.7	499.9	4.7	25.1	6.1	12	57.4	255.4
AE111	0.48	0.645	354250	133200	12.05	1499.4	4.8	97.5	4.7	5.3	5.3	9.1	49.2	118.3
AE112	0.12277469025	0.1824389235	262350	467100	713.1	1314.8	30.9	36	4.9	5.3	8.5	8	101	85.4
AE113	0.249100605	0.26421649175	194900	148950	5745.05	8259.15	14.6	11.8	5	5.7	7.1	6.6	761.6	1103.5
AE114	0.3474697355	0.37360458075	38650	80100	3636.2	3844.55	32.8	16.9	7.7	7.9	7.4	7.5	444.2	591
AE115	0.27663889475	0.3423753475	190350	33850	1937.55	3966.7	12.9	12.3	5	4.9	6.5	6.5	223.1	330.8
AE117	0.25048902575	0.30633718125	33300	53300	284.35	4703.55	5.2	25	5.2	5.2	6.1	7.3	60.5	207.5
AE118	0.350310141	0.26881984775	91150	136850	2941.7	8046.55	17.7	12.1	8.1	7.4	7.3	6.8	90.7	154.4
AE119	0.30967933675	0.32382084025	224200	233050	1899.05	3539.45	14.3	18.3	6.3	6.3	8.9	7.7	265.6	186
AE120	0.26455848825	0.36389080775	197300	289700	1637.95	3952.45	22.1	25.9	4.9	5	11.2	9.7	189.2	791.7
AE122	0.2477384545	0.29360729225	60700	134700	2647.3	4513.8	24	22.4	5.2	5.2	8.5	7.5	148	234.8
AE123	0.24794134275	0.4245022965	124300	78850	1068.55	6473.15	8	32.2	4.9	5.5	7.5	8.4	100.7	243.3
AE124	0.25688107875	0.31218029475	92750	65950	2873.3	5158.35	6.5	11.4	5.3	6.7	6.2	6.4	80.6	107.8
AE125	0.22720943575	0.27488046425	305550	729250	141.3	4257.9	5	63.4	4.7	5.3	6.4	13.6	116.1	102.9
AE127	0.342188609	0.3209941785	83500	129350	2730.4	4096.2	30.1	30.4	6.3	6.6	6.8	6.7	284	522.1
AE128	0.224224116	0.3192477365	86800	149800	2404.45	5124	26.5	35.4	6.2	8.7	6.7	7	261.4	606
AE129	0.237296931	0.3990732345	86400	77750	377.05	3919.4	5.4	37.4	4.9	5.3	6.2	6.7	64.9	228.6
AE13	0.22741701225	0.1643814765	211700	205750	3781.45	4019.7	12.6	11.3	5.6	5.5	6.6	6.7	247.1	308.1
AE130	0.276735702	0.3615109765	100450	132150	2782.1	6675.15	66.7	62.3	5.2	6.9	9.7	10.6	94.2	483.7
AE131	0.25633660075	0.35001050675	54050	32000	3183.85	3648.7	52.9	24.6	6.3	6.4	10.2	8.9	337	319.8
AE133	0.249911602	0.353513139	39300	72200	2956.95	6177.25	85.7	92.1	5.2	6	9.6	9.4	150.6	461.3
AE134	0.31237950675	0.40330115425	15450	58650	4330.65	5860.1	64.6	40.1	5.6	6.4	10.1	10	418	415.5
AE135	0.343721207	0.281092165	162850	173400	3143.8	6996.75	18.1	45.1	5.2	5.3	8.1	9.4	227	366.5
AE136	0.27872484125	0.4475803285	46500	74150	1134.5	3383.75	8.1	20.5	12.6	23	6.9	7.4	67.3	81.6
AE137	0.236249954	0.34046352775	68850	159000	1799.6	4066.15	14.9	18.9	4.8	6.7	6.2	7.3	71.9	228.1
AE139	0.23110633975	0.3288059825	470500	121950	4154.3	6496.95	8.6	30.1	4.8	5.8	6.3	7.6	62.4	358.9
AE14	0.23669362025	0.1437074495	115150	146450	3649.9	3574.35	20.7	15.1	5.4	6.1	9.1	8.8	497.7	529.2
AE143	0.233973209	0.26003784425	174850	346800	4764.95	6416.25	40.6	36.1	6.9	7.7	9.7	12.1	267	407.6
AE144	0.228236097	0.32324848675	237500	338950	1529.65	5325.65	18.6	22.7	7.3	9.5	10	12.9	310.9	483.5
AE145	0.29070239975	0.40163865825	68150	107150	4439.35	6422.6	61.7	48.8	5	5.3	9.1	9.7	231	778.2
AE146	0.2510866395	0.35774517625	366450	495700	3984.75	7288.5	15.9	38.2	5.5	6.3	8.4	11.2	306.8	432
AE147	0.22655830425	0.327504292	207600	123550	2576.05	5149.55	12.3	34.6	5.3	5.7	8.6	10.6	140.1	259.1
AE149	0.16989394275	0.2437837015	147650	180850	1798.9	2507.15	21	14.2	4.9	5.1	6.2	5.9	266.2	313.3
AE15	0.21447753225	0.13850238025	515900	503250	4602.6	4421.2	48.7	30.2	12.6	13.9	9.4	8.9	657.6	630.9
AE150	0.19143392925	0.346109908	88100	260950	3214.15	2702.7	13.7	12	4.9	5.3	6.4	5.9	91.2	116.3
AE151	0.2510556225	0.31813071425	1136250	374550	3543.7	4990	40.6	25.4	10.2	10.5	7.7	6.9	194.6	170.8
AE152	0.185627234	0.34733369075	368650	600250	5569.5	5597.85	37.8	19.9	5.4	5.2	5.7	6.3	608.9	535.5
AE153	0.2465296165	0.2856875785	77100	72850	4531.85	5436.8	19.3	18	5.7	4.9	6.8	5.8	221.2	653.7
AE154	0.34856271675	0.52068993175	171700	90400	6955.05	5876.3	19.3	19.1	7	9.2	6	5.8	97.2	134.5
AE156	0.19777938975	0.23401017775	56950	144350	3423.45	4097.8	15.4	23.8	5.8	5.3	6.1	7.4	94.6	190.5
AE157	0.2255247105	0.29972827625	227250	142500	2069.65	3995.4	15	16	9.8	12.1	5.7	6.1	106.4	252.6
AE158	0.2798078815	0.4297909575	485900	351750	1299.3	4310.8	11.6	39.5	12.8	13.6	14.6	13.4	61.3	234.5
AE159	0.2008203575	0.275579201	53850	127950	2277.3	4360.4	22.1	39.9	5.8	5.7	7.3	7.6	363.4	383.6
AE16	0.26361448275	0.141870688	199600	272800	18.15	3975.15	5.3	72.7	4.6	6.3	6.1	12.2	55.6	413.5
AE160	0.175727084	0.42999602525	205700	494250	3821.15	5278.7	25.8	59.6	6.2	7.5	7.1	12.4	243.9	509.2
AE161	0.41706725625	0.46478318025	267500	825000	4711.75	3743.3	47.6	27	10.3	11.2	9.5	9.7	345.1	530.9
AE162	0.385218412	0.53741540275	125750	228150	4028.25	6613.85	43.3	16	6.8	7.6	7.5	7.3	205.7	554.1
AE163	0.34740096325	0.5254971175	114050	331450	5241.05	5714.55	47.3	33.8	6.2	6.6	6.9	6.5	659.7	704.1
AE164	0.323620363	0.52486120125	436600	223850	3746.55	4987.4	28.1	82.5	7	10.8	8.7	15.2	149.7	369.1
AE165	0.26093393425	0.39198755625	31250	53050	2701.75	5233.25	11.9	19.9	5.5	4.9	6.1	7.2	79.4	263.1
AE166	0.381754766	0.492919396	73950	153200	6023.2	4537.75	32.8	17.8	5.7	5.1	6.7	6.2	195.9	214.5
AE167	0.3053360565	0.40817902275	185700	307250	2891.75	2008.5	25.3	11.7	7.6	7	5.9	5.8	80.5	93.3
AE168	0.25883532175	0.47343226875	78250	171600	7159.8	4867.55	18.3	15.2	5.7	8.8	7	6.3	230.4	408.6
AE169	0.416992997	0.54422095025	47550	119600	2364.65	4012.75	11.6	26.4	5.7	7.7	7.1	6.8	108.4	271.4
AE17	0.20058099425	0.1734930525	157850	221750	1929.4	3610.6	8.1	9.7	4.9	5.6	6.3	7.1	742	1169.1
AE170	0.33482470825	0.4521535095	199150	1073400	1876.25	4731.55	18.7	33.2	5.1	5.3	5.6	6.3	113.6	259
AE171	0.37764354725	0.4575359085	194700	299350	3529.35	6076.6	62.3	60.5	4.9	6.3	6.1	9.2	195.5	541.7
AE173	0.287073245	0.5320462845	159850	246050	5367.7	4210.65	49.5	15.8	6.6	5.4	6.8	6	146.2	207.6
AE174	0.35847515725	0.47023358625	45500	91650	4601.8	4544.75	37.3	16.8	6.1	7.7	6.9	5.8	307.4	977.2
AE175	0.34694936775	0.50419805275	817550	253750	3812.4	4465.2	39.8	24.6	6.4	7.1	7.1	6.5	226	527.7
AE176	0.1957825515	0.3626852545	40750	135400	3450.25	4560.9	14	10.5	5.6	5.1	7.2	6.9	158.5	339.2
AE177	0.3125147675	0.4435235645	160500	560200	5502.75	7830.65	33.7	46.6	5.4	7.2	7.1	6.8	155.9	552.8
AE178	0.33645109675	0.45805355525	125750	239800	3429.35	2727.25	12.7	11.1	5.5	5.7	6.3	5.4	147.5	181.6
AE18	0.2452285755	0.2118782775	252000	236350	1740.1	4024.1	11.2	11	4.9	5.6	6.3	6.6	786	1296.4
AE19	0.230641615	0.211652956	216800	177950	360.55	20622.5	22.3	74.2	5.1	8.5	5.8	10.2	55.5	237.2
AE20	0.22901799675	0.2285480345	64650	65050	817.15	1154.95	91.9	57	4.7	4.8	6.7	6.8	69	60.6
AE21	0.2804612535	0.15690214375	435100	306300	1658.4	3107.6	13.8	19.8	6.1	6.5	7.5	8	196.5	418.9
AE24	0.26844863375	0.1500472865	286500	341700	13103.75	3092.95	11.7	55.4	5.1	8.8	6.7	10.3	56.6	82.9
AE25	0.16170170125	0.18500424025	274500	228200	4672.3	4596.2	46.7	38.7	11.3	23.3	7.3	8.4	339.3	463.1
AE28	0.211968455	0.1986212265	127650	122550	800.3	2423.75	8.4	49.8	5.9	6.9	6.3	8.6	57.5	104.4
AE29	0.25937491525	0.2054150395	187550	175250	4860.2	4896.85	109.3	123.3	6.1	7.2	49.3	45.9	552.9	384.3
AE30	0.27201065525	0.2365355135	184250	213750	4137.4	3772.9	93	85.9	8	5.6	26	25.8	698.6	769.1
AE31	0.17353609525	0.1261852445	203300	180750	3688.15	3153.2	16.3	10.3	5.8	6	6.3	6.3	495.2	435.1
AE32	0.23343518725	0.164243094	150200	212950	3701.55	5137.95	70.6	41.4	7.9	9.3	8.1	8.1	728.9	908
AE33	0.139957525	0.21994318075	324250	354150	3142.5	3614.15	14.5	11.5	7.5	7.4	6.9	6.4	78.5	85.8
AE34	0.238535973	0.26840179125	115600	96400	821.2	2447.9	6.1	70	4.9	6.1	6.1	13.2	58.6	314.5
AE35	0.205080011	0.26747280975	400200	320550	742	2510.8	658.2	378	5.1	7.5	6.2	18.8	60.8	109.3
AE36	0.299444783	0.29700296825	112900	172250	133.65	2256.7	5.1	94.9	4.8	6.9	6	11.8	56.7	83.1
AE37	0.24959283725	0.22590845375	159950	148850	6434.55	7459.5	47	27.6	5.6	5.3	7.8	7.7	364.2	582.4
AE38	0.17768794625	0.1682728155	229100	141400	1436.5	4184.5	19.3	46.8	5	5.7	6.9	11.4	59.3	125.1
AE39	0.21323707275	0.19656878525	136450	139000	987.35	1698.95	7.9	11.1	4.9	5.2	6.5	7	320.2	605.7
AE40	0.223650579	0.19168543	185900	157300	3560.7	3651.8	27.8	55.8	14	27.1	10.1	15.2	170.7	225.6
AE41	0.25934043225	0.284044617	471150	185300	3859.45	4081.6	31.8	23	7.6	8.8	8.3	8.8	915	976
AE42	0.27632937325	0.2779853165	281950	58700	4285.85	5190.5	49.6	59.2	7.9	12	14.1	22.1	767.1	1157.4
AE43	0.3409260065	0.335924576	281900	280950	1440.6	3929.8	6.1	41.1	5.2	6.5	6.1	10.5	59.6	125.2
AE44	0.2986097785	0.23629199075	201400	232450	4688.9	6277.7	52.8	27.5	5.3	6	7.6	9.7	701.6	919.5
AE45	0.314290851	0.2402895485	278300	193150	1439.25	4809.85	15.8	10.8	5.3	7.2	6.4	6.9	178.8	223.9
AE46	0.241531767	0.17517939575	158150	146050	2663.55	3715.9	80.4	65.8	10.3	11.7	31.3	29.8	167.1	243.3
AE47	0.22673027325	0.168784106	255100	163700	585.35	4103.65	55.9	171	7	32.1	6.3	10.9	57.5	183.8
AE48	0.27649943525	0.17883682525	240600	152000	376.3	1760.6	35.6	50.4	5.8	8.8	6.2	9.6	56.5	156.1
AE49	0.1530301155	0.3380524315	117500	101850	107.85	2912.65	32	93	6	23.7	6.3	11	55.5	134
AE51	0.385801197	0.4381568665	327400	408150	4225.4	5521.2	21	20.6	7.3	8	12.5	14.8	833.8	1154.8
AE53	0.233907654	0.21580910725	213850	149100	3446.55	3389	30.4	18.7	8.6	8.9	7.3	7.3	459.9	650.4
AE54	0.28117371925	0.1838433595	274150	241750	4564.6	3854.75	57.9	25.9	23.2	21.7	8.7	6.9	618.4	727.5
AE55	0.190882506	0.173845397	154650	73800	5393.15	4483.1	30.4	13.9	10.4	9.4	14.1	11.4	883.9	1050.1
AE56	0.17739386625	0.15343366375	183300	209750	3807.4	3844	70.9	36.3	48.9	27.4	7	6.2	664	559.9
AE57	0.15213414125	0.346689418	156550	180350	2870.9	4333.95	16	12.6	7.1	8.1	6.8	6.3	371.1	774.8
AE58	0.1583574475	0.13496075625	70850	89150	2126.8	2130.65	23.6	12.9	5.4	5.3	6.6	6.2	145.6	128.7
AE59	0.1779774245	0.17151376925	158800	239350	303.9	2192.05	17.3	192.9	5.7	18.3	6.3	13.5	56.5	273.7
AE60	0.249886238	0.21467713075	324550	347200	159.65	3137.15	33.4	108	7.9	19.6	6.2	9.3	57.3	212.6
AE61	0.28154252775	0.313950152	325100	153000	6234.7	5599.65	37.7	17.9	16.5	12.4	7	6.6	479.4	527.5
AE62	0.20739662325	0.17238164975	1281450	345500	4478.25	4129.05	40.5	27.7	17.6	25.9	8.2	7.1	240.7	256.6
AE63	0.151942141	0.127531094	183550	157350	368.85	3062.1	65	246.3	9.9	49.7	6.5	15.7	52.1	226.7
AE64	0.244060847	0.18245254525	221000	213650	3260.4	4105.4	21.7	15	6.3	7.5	6.4	6.8	676.9	892.6
AE65	0.81538347475	0.22840094475	235000	257200	3740.55	3324.55	44.9	21.4	7.5	6.3	8.1	7.4	340.6	262.1
AE66	0.29496020475	0.2689799315	83000	111550	3852.25	3953.05	59.8	41.7	15.4	22.8	13.1	8.8	186.2	174.9
AE67	0.27154630675	0.2018190685	107600	134900	4951.15	5374.4	35.6	19.8	5.1	5.9	6.4	6.9	422.1	586
AE68	0.205322473	0.239269522	79200	212500	5847.8	5397.4	52.1	18.8	8.1	7.4	7.6	7.3	329.1	297.7
AE69	0.2642276915	0.22771140975	136150	263550	7945.35	7516.3	21.7	12.2	8.6	10.3	6.3	6	662.3	648.7
AE70	0.29193694925	0.19276941725	541250	192300	2861.25	3173.1	15.1	9.1	7.2	8.1	7.5	6.8	385.6	525.4
AE71	0.1881989785	0.144215	272500	272450	714.6	2447.95	49.5	95.3	5.4	15.9	6.4	10.9	73.1	353
AE72	0.251098825	0.177157906	245400	203250	296.1	3394.75	16.4	117.6	4.9	6.2	6.2	12.3	59.7	197.1
AE73	0.19338984575	0.22679087425	236800	306950	4017.1	4606.75	28.9	18.7	8.3	7.9	6.3	6.4	337.2	225.4
AE74	0.23643363325	0.194942332	270500	767350	7376.35	12220.45	19.9	22.7	12.5	19.5	8.3	7.5	275.1	348.8
AE76	0.26768881225	0.22072740725	61500	94100	3765.35	3481.8	30.5	23	12.8	13.4	10	7.8	251	202.6
AE77	0.3295702915	0.23839100525	56450	58400	1791.35	3294.45	31.4	32.6	7.8	9	10.1	8.5	160.3	105.3
AE78	0.263500274	0.209672874	134650	67050	4511.35	4609.55	54.6	30.9	5	5.6	9.2	8.2	353.1	329.2
AE79	0.6276575	0.5025	336650	413700	4410.5	2335.15	24.9	8.7	6.2	5.4	6.4	5.6	411.3	403.6
AE80	0.724625	0.7575	331950	542950	9743.45	8725.35	16.1	18.3	5.8	4.8	7.5	7.9	363.4	862.1
AE81	0.516575	0.4525	251250	257950	6918.4	2672.1	36.2	26	5.1	5.7	6.2	5.6	1087.6	1466.3
AE82	0.673	0.5175	390650	444600	49.65	44.4	5.1	9.6	4.8	5.2	5.2	5.2	45.8	77.7
AE83	0.47425	0.5375	139950	100300	6698.7	5658.7	22.1	14.2	8.5	6.6	9.1	7.7	59.6	160.9
AE84	0.519375	0.6875	516450	406950	8027.05	8120.1	12.3	19.9	5.4	6.5	6.7	9.2	64.7	249.4
AE85	0.729	0.43	561350	642500	7921.2	6093.35	15.9	16	5.2	4.9	5.3	5.5	716.5	1049.5
AE86	0.6557	0.47	289200	323950	1933.95	1200.75	9.7	7.3	5.3	5.1	5.8	5.7	248.4	255.4
AE87	0.50555	0.46	253750	406700	8909.6	7897.3	36.4	18.7	11.4	8.6	9.5	6.3	369.7	722.8
AE88	0.579	0.49	513350	267000	10544.8	8189.6	41.3	28.9	8.5	9.7	8.4	8.4	511.1	1040.5
AE89	0.601	0.5225	404000	322650	13841.8	8334.8	62.1	31.3	7.8	7.7	8.2	7.5	509.7	972.2
AE90	0.7355	0.5225	480850	297100	6768.6	5547.8	18.4	15	7	9.2	6.6	5.9	415.4	761.8
AE91	0.652375	0.6925	156850	165850	12448.5	8862.6	58.7	47	7.9	7.8	9.2	8.1	415.2	865.2
AE94	0.5668	0.47	445550	222800	9368.05	7727.25	48.9	63.6	7.8	10.8	9.6	8.3	397.2	966.9
AE96	0.575075	0.4775	201150	209300	4829.2	2964.7	19.9	16.8	5.6	5	6.8	7.4	467.3	395.6
AE99	0.647125	0.5775	323950	283450	6705.2	7038.75	31.9	24.8	9.6	7.4	8.7	8.4	326.5	609.4
BB02	0.1985	0.3755	9200	65200	5573.35	6376.55	7.8	10.1	5.6	6.6	5.6	5.7	394.2	922.1
BB04	0.44	0.355	95700	51250	2437.1	4305.85	7.3	6.5	5.1	5.2	5.5	5.7	731.1	818.2
BB05	0.475	0.40675	140850	154300	81.55	3395.8	4.9	23.5	4.8	5.5	5.3	5.7	45.5	502.1
BB06	0.4325	0.3775	12400	66450	7.55	4277.8	7.3	12.3	5.3	5.5	5.4	5.7	108.2	458.8
BB07	0.5175	0.52	60500	52250	7.6	3908.8	6.3	16.9	4.9	5.3	5.6	5.7	98.1	523.2
BB08	0.2125	0.25325	57250	226750	378.35	4727.05	8.6	212.7	5.4	8.4	5.7	6.6	110.2	825.1
BB09	0.5775	0.405	90750	195900	3544.75	5126.75	33.2	51	5.4	5.4	5.6	6.3	550	1130.3
BB10	0.19	0.43	2650	154450	8463.55	4117.75	9.1	28.5	5	5.8	6.2	5.9	201.3	572.1
BB11	0.43	0.33775	207100	389750	45.6	3636.45	5.1	19.2	4.8	5.9	5.6	5.9	47.7	547.2
BB12	0.51	0.415	33550	43200	13.2	4354.35	4.9	25	4.9	5.5	5.3	6.2	48.4	631.2
BB14	0.32	0.25325	53350	46850	42.45	4226.45	5.9	10.6	4.8	5.1	7.6	5.7	126.2	406.9
BB15	0.3925	0.3395	219200	265550	1378.2	2336.55	6.2	5.9	5.9	5.6	5.3	5.6	216.2	389.5
BB16	0.1825	0.2145	21000	43450	686.4	2277.2	7.5	10.2	5.9	5.4	5.4	5.8	328.6	286
BB17	0.4525	0.324	42450	97650	14701.8	9624.35	7.4	69.6	6.4	5.6	5.5	5.6	180.9	180.6
BB18	0.5275	0.3925	19600	35150	81.05	2855.25	5.5	12.2	5	5.7	5.4	5.6	246.5	321.4
BB20	0.4175	0.34	59150	57200	11248.85	12557.3	7.8	14	5.5	7.6	6.1	7.5	68.6	235.9
BB21	0.445	0.47	74850	49950	3378.5	3136	8.8	9	4.9	5.4	5.5	6.1	403.8	476
BB23	0.37	0.242	66200	58450	45.05	3624.8	5.2	11.3	4.9	5.5	5.3	5.4	50.1	533.1
BB24	0.375	0.3925	9250	41500	80.55	2817.2	4.7	14.6	4.7	5.4	5.2	5.2	47.8	549.6
BB25	0.35175	0.2715	55150	107150	10.5	4344.9	7.6	14.1	4.7	5.2	5.3	7.1	208	415.2
BB26	0.45	0.36225	18850	50450	2476.7	2834.45	10.4	14.1	4.8	5.3	5.7	6.1	122.7	223.7
BB33	0.160425	0.275	36850	255850	2666.45	4211.95	199.6	6.4	4.9	4.5	5.1	5	380.9	542.5
BB34	0.024	0.265	4450	103750	9.75	5435.6	13.8	12.3	5	4.8	5	5.3	32.5	312.4
BB36	0.024	0.231	1400	58900	8.75	1871.2	13.3	62.5	5	4.9	5	6.7	31.2	163.4
BB37	0.0712875	0.2325	32400	78650	5868.05	7350.2	37.7	11.9	5.3	5.3	5	5.2	112.5	229.4
BB38	0.09704	0.235	53550	70700	45.4	2637.95	15.4	10.8	4.9	5.4	4.8	5.2	33.7	197.5
BB39	0.0847175	0.23	43200	61150	1252.05	2079.4	165.2	27.2	6.1	6	6.3	6.5	296.4	554.6
BB43	0.130105	0.245	13350	44350	3861.7	5521.45	21.5	53.9	11	9.5	8.4	42.4	49.4	259
BB44	0.0823375	0.2	140950	424650	3624.1	9478.9	68.8	16.9	5.6	5.9	8.8	8	83.8	327.2
BB45	0.0445	0.2135	7950	125150	11.75	6514.6	14.9	9.4	5.1	4.8	4.9	5.3	32.7	286.8
BB46	0.0837605	0.26325	103500	136600	185.7	3147.15	13.6	46.7	5	5.7	5.4	7.3	32	186.8
BB47	0.027	0.32325	1350	106750	1605.5	2363.45	690.4	70.5	20.5	20.3	11.1	10.1	1307.2	2900
BB48	0.104	0.28	4550	76350	8.65	1639.8	13.6	70.4	4.8	5.7	4.8	7.7	31.9	195.7
BB49	0.0145	0.1725	3800	181500	8.85	1602.35	13.6	60.4	4.8	5.3	4.7	7.4	31.4	214.2
BB50	0.066250325	0.13275	104800	494900	2044.35	2719.75	1189	22.1	6.3	6	6.6	7.6	2548.7	3758.2
BB51	0.137635	0.245	30700	35950	2038.1	4347.95	17.7	12.2	5.2	6.2	5.1	5.8	48.3	131.9
BB53	0.0525	0.21	6950	291200	1088.85	1857.95	42.6	9.5	4.9	6.6	4.9	5.1	98.7	197.1
BB54	0.10703	0.242	255800	162750	1407	4854.75	50.2	37.1	5.3	5.7	5	6.7	64.6	506.8
BB55	0.0905	0.3075	2750	127200	6511.95	7421.5	23.3	13.2	5.6	5.1	5.3	5.2	98.3	187.7
BB56	0.0765105	0.30575	5500	44450	4990.35	8970.1	75.1	15	5.8	6.7	5.8	5.3	94.1	384.7
BB59	0.04575	0.24225	10600	181700	2507.15	2832.35	22.3	8.6	7.9	6.6	5.9	5.6	49	91.6
BB62	0.10156	0.2275	166700	182800	4664.5	6507.15	14.9	36.4	5.3	5.4	5.1	6.1	35.3	1775
BB65	0.089	0.17525	214150	382950	2490.35	5932.5	15.5	9.6	6.2	7.1	5.1	5.6	34	213.1
BB67	0.0255	0.2255	1900	105950	5367.4	6645	24.2	21.3	7	5.4	5.6	13.2	40.1	269.6
BB68	0.126	0.33	18750	80100	4829.8	4005.3	25.6	15.8	5.2	5.6	5.6	7.2	45.8	136.9
BB69	0.07517	0.26425	3900	106400	11.95	5848.5	13.6	8	5	4.7	5	5.3	33	198.1
BB70	0.09392	0.27675	19200	48450	7230.5	5485.2	47.3	7.9	6	5.1	5.4	5.4	135.6	178.1
BB71	0.027500975	0.224	3450	107300	587.35	1571.45	43.5	58.8	5.5	5.4	5.8	7	58.9	120.1
BB72	0.0342500002	0.22025	7850	117250	189.25	2454.75	14.5	38.5	5.2	5.3	4.9	6.2	34.1	217.3
BB73	0.04035	0.1595	8600	46400	1148.35	2385.85	15.2	8.8	5.9	6.7	5.8	5.7	34.3	111
BB74	0.056	0.1815	406900	273650	2213.2	7264	16.6	15.1	58.3	69.9	5.4	5.6	32.8	237.2
BB75	0.047255	0.279	7700	250950	6169.85	5840.45	20	9.1	5.2	5.6	5.3	5.5	46.7	147.1
BB76	0.10975	0.2775	1500	135800	2380.2	5684.25	14.5	12.7	5.4	6.1	5.3	5.7	32.9	235.3
BB77	0.03027075	0.21175	6700	118200	12.9	1679.9	14.2	56.4	5	5.7	4.8	7.3	33.4	173.2
BB78	0.02025	0.2295	2550	160000	3496.4	5170.9	19.9	29.2	5.2	5.8	5.1	7	43	144.9
BB79	0.103975	0.29275	48500	255950	5116.65	6789.9	14.5	8	5.3	5.2	5.1	6.2	49.6	404.4
BB80	0.092295	0.2125	82500	277250	9405.85	8278.8	132.7	27.4	5.5	5.8	5.8	6.7	187.1	431.2
BB81	0.056325	0.15225	24250	120600	1859.1	3364.65	24.8	18	6.2	8.7	6	5.6	55.7	83
BB82	0.09	0.2285	46200	426050	1149.15	6575.15	38.3	25.5	5.7	6	8	7.4	68.7	273
BB83	0.07075	0.223	124650	354350	1192.7	7950.7	32.6	23.6	5.6	6.3	7	6.9	58.5	240.5
BB84	0.106025	0.265	196450	616150	15.35	1685.9	13.8	47	5	5.4	5.2	7.6	32.3	178.1
BB85	0.0312545	0.25775	7050	211950	885.9	5207.3	14.5	10.1	5.1	5.6	5.3	5.4	92.5	481.5
BB86	0.14125	0.3275	50050	102900	1428	2730.1	14.6	18.1	5.1	4.8	5.4	5.4	31.5	205
BB87	0.066025	0.272	14000	42900	1617.5	7053.9	14.3	11.6	5.2	8.6	5.5	5.4	32	259.2
BB89	0.111825	0.19525	68900	173250	16.3	1688.05	14.2	50.8	5	5.9	5.2	8	33.2	199.8
BB90	0.0255	0.24725	2350	107000	15120	8977.1	19.7	48.6	5.6	5.1	5.5	9	38.8	116.9
BB91	0.0533	0.19875	81350	234000	5111.75	4586.45	18.2	8.8	5.4	4.9	5.5	5.2	36	80.5
BB92	0.0475725	0.308	12700	80700	5201.65	4376.3	120.5	20.3	5.4	5.1	5.5	5.7	168.1	377.3
BB93	0.1759	0.325	3300	24250	2196.25	3191.45	20.1	11	7.6	6.9	8.2	6.2	49	124.7
BB94	0.046725	0.18975	45700	121400	7069.25	6437.2	73.1	8.6	6.6	5.9	5.5	5.4	192.6	275.6
BB97	0.055375	0.21025	15300	126750	3985.7	3873.3	14.1	9.5	5.4	5.5	5	5.6	188.3	260.7
BB98	0.11075	0.355	10400	71200	12.7	5101.2	14.2	10.3	5.2	5.8	4.9	5.2	30.4	249
BB99	0.053475	0.2655	9750	136250	2070.25	1336.95	589	8.4	8.8	7.5	7	5.1	589.2	1899.1
BCW01	0.2743617166	0.3176949812	298040	127440	7849.84	5186.76	27.28	31.2	5.36	5.68	7.2	6.64	343.52	541.76
BCW02	0.4551000338	0.4455725326	225160	103040	4743.2	3141.72	20.24	33.44	6.24	5.36	8.24	7.76	377.6	572.08
BCW03	0.5701065704	0.4476845778	245120	120560	1164.92	1638.96	9.44	7.28	4.96	5.2	6.08	6	587.36	852.24
BCW04	0.4721611864	0.436844959	306680	127440	2081.8	3992.88	36	38.24	5.04	8.32	7.28	14.48	118.56	419.28
BCW05	0.1609992114	0.2680652508	261400	65400	4900.24	5290.96	11.6	10.16	5.04	5.84	6.16	6.64	82	303.36
BCW06	0.2597810748	0.3662265634	359680	204640	3010.08	4314.6	75.44	87.2	6.08	7.44	7.76	8.08	162.72	331.76
BCW07	0.4473399908	0.3827327236	408800	203040	3518.48	3347.8	15.04	9.68	6.64	6.96	8.08	6.96	142.08	146.48
BCW08	0.211702664	0.2989462172	272960	345880	1494.88	1847.08	40	17.44	4.96	5.28	8	7.28	61.2	116.96
BCW09	0.2073424918	0.2865832508	34680	318240	6903.56	8191.4	22.64	22.72	6	7.12	8.4	8.48	436.48	784.16
BCW10	0.337623659	0.3992190778	454160	691520	6082.68	8765.72	11.04	39.04	6.08	7.04	7.84	10.32	288.32	556.64
BCW11	0.4669134594	0.4801941968	240160	190960	4457.52	7208.4	12.4	40.32	5.52	7.2	8.72	10.88	148.88	503.04
BCW12	0.376825701	0.368036076	239080	256840	4424.4	4833.44	47.2	51.68	4.96	5.76	7.76	9.76	273.2	574.48
BCW13	0.3827529844	0.4234674254	274320	117480	4325.36	5832.16	22.96	17.36	5.68	7.28	7.76	7.44	495.36	554.56
BCW14	0.184134482	0.2941640936	294280	216840	4145.12	2440.16	19.76	19.6	6.64	5.68	7.2	6.64	867.12	1182.16
BCW15	0.4067707456	0.369648207	185280	237600	6284.2	5189.64	25.36	14.56	6.96	7.68	8.32	7.12	263.44	312.96
BCW16	0.4243713256	0.394555353	394800	264960	2547.88	4344.92	45.6	33.68	5.44	6.16	7.28	7.12	361.36	417.84
BCW17	0.45856524	0.337182713	301920	261360	10112.84	6614.36	16	15.84	5.2	5.36	6.72	6.16	431.2	290.56
BCW18	0.3891927744	0.3960721504	148760	309280	4293.6	4007.64	12	65.52	5.68	6.4	6.48	7.76	161.76	347.68
BCW19	0.36811828	0.32596315	213440	175640	4548.92	3250.16	17.04	12.72	5.84	5.6	6.96	6.48	1305.04	933.52
BCW20	0.4866371672	0.4352064728	285960	141480	2790.32	2774.56	32.08	16.56	4.96	5.04	6.88	6.48	235.84	259.92
BCW21	0.4417645666	0.3872227086	642720	359720	11166.52	5660.24	45.2	28.72	8.16	7.6	8	7.52	702.8	672.88
BCW22	0.2373660332	0.2712340282	59160	151600	3267	4290.6	11.52	42.4	5.76	6.16	7.84	8.32	181.2	490.48
BCW23	0.537662607	0.4797564834	194400	203680	5943.48	6044.56	21.92	33.84	6.4	7.28	8.56	9.44	187.84	582.88
BCW24	0.4850586266	0.4066685868	362120	232080	3970.16	4362.64	10.96	32.4	7.36	6.4	7.6	7.68	200.64	433.68
BCW25	0.3813381104	0.3486921752	303960	175520	6459.12	6580.44	24.16	29.6	5.44	7.04	9.12	11.2	297.92	507.2
BCW26	0.3698072332	0.3770464664	580440	196520	8290.6	7642.4	26.56	32.4	5.36	5.36	9.2	6.96	416.32	648.16
BW01	0.933825	0.6525	965600	822200	9587.3	9542.45	30.7	27.5	8.2	12	7.1	6.8	456	1261.7
BW02	0.955	1.015	754100	750350	6403.3	5301.15	8.5	9.3	5.9	6.3	5.9	5.6	129.8	225.3
BW03	1.107	1.06	993050	684000	4929.5	3292.4	21.1	28.3	7.7	8.2	7.2	6.9	200.2	289.9
BW04	0.95025	0.82	846050	512600	4990.05	3991.4	17.6	19.8	10.8	12.8	8.9	7.7	79.4	163.7
BW05	0.81375	0.6375	823350	918000	4559.25	2594	6.8	5.2	4.9	5	5.4	5.4	95.5	166.1
BW06	0.7754	0.5875	688150	554100	14018.35	15780.3	36.8	29.5	11.2	9.1	7.6	8.2	80.1	151.4
BW07	0.955	0.655	651750	452900	3821.05	2597.7	14.7	16.5	6.6	7.1	7	6	106.7	373.9
BW08	1.034	0.66	842500	463600	15059.25	8961.35	20.6	13.9	6.6	9.3	8.4	6.4	1278.6	1033.3
BW09	0.7226625	0.4975	702350	575250	8257.9	7540.95	45.6	23.4	8.4	8.6	7.3	5.9	422.9	786.9
BW10	0.93675	0.655	414750	667850	7255.9	6452	34.5	25.6	6.2	6.3	6.5	6.7	321.8	639.8
BW11	1.0325	0.7075	380200	495550	6857.85	5788.6	26.2	18.9	8	8.4	9.2	7.3	361.5	887.3
BW12	0.9005	0.76	641000	653700	5818.65	5947.95	20.4	19.6	8	10.2	6.4	5.6	363.7	803.9
BW13	0.92575	0.68	533800	328700	6018.05	5180.25	33	40.8	7.2	9.3	7.3	6.5	496.5	832.1
BW14	0.97525	0.605	542000	432400	9105.5	9433.5	17.3	24.6	7.3	6.2	7.5	7.9	589	1207
BW15	0.95425	0.6925	754450	501400	7224.35	5944.15	20.9	15.6	5.4	5.1	6.1	5.6	168.5	255.4
BW16	0.815625	0.505	373400	334600	35.2	14.65	4.8	4.8	4.9	4.6	5.4	5.3	44.2	79.4
BW17	0.79250575	0.6425	595700	559700	4792.85	2996.3	26.1	33	6.3	5.9	6.8	6.7	352.5	795.6
BW18	0.7265	0.6125	496050	1022450	6065.1	6237.65	29.1	21.9	7.5	7.8	7.2	6.1	1360.7	2401.3
BW19	0.75425	0.805	408200	467100	15864.05	4159.75	33.3	15.2	11.1	7.7	8.6	6	204.4	367.9
BW20	0.74	0.83	653450	453100	3681.9	4284.4	13.7	13.3	6.2	6.2	8.7	6.2	162.2	284.6
BW21	0.542605	0.5425	310350	496350	13691.1	8840.3	61.1	51.1	13	19.6	13.4	13.7	430.1	855
BW22	0.74625	0.6125	901100	859800	7994.65	8210.25	25.8	24.3	7.7	7.9	7.2	6.5	317.9	622
BW23	0.77025	0.64	899000	453300	6228.25	6031.45	20.2	18.3	7.6	8.8	7.1	6.8	474.5	914.6
BW24	0.6989	0.4975	468050	267600	8660.2	6514.2	33	14.4	7.6	7.7	7.7	5.8	363.5	663.2
BWd01	0.28675	0.28	50200	104700	3613.25	5627.2	37	21.2	6.9	9.1	6.3	8.6	183	341.1
BWd02	0.2045	0.38425	48700	104300	3934.2	7480.65	114.7	76.9	31.2	39.7	5.3	5.9	81.9	286.3
BWd03	0.23175	0.4	162900	117500	1967	2950.55	16.6	8.8	4.9	5.3	5.8	5.3	229.2	252.7
BWd04	0.20175	0.4025	90600	109650	3814.3	5062.55	240.1	31.7	5.6	5.8	6.1	6.4	100.7	705.9
BWd05	0.22125	0.4225	66650	148950	4426.9	5223.7	151.2	23.5	6.7	6	5.8	6.2	301.3	709.4
BWd06	0.16325	0.3425	21500	25850	3716.45	6530.85	42.9	50.1	5.9	6.9	6.1	5.5	158.4	288.7
BWd07	0.1885	0.3825	106800	172750	5372.95	6916.45	244	34.1	9.7	10.4	6.3	6.2	213.5	976.6
HW01	0.665375	0.57	416950	444300	16860.45	10415.8	32.7	26.6	13.2	12.1	9.2	6.9	203.3	436.2
HW02	0.88625	0.965	758500	1214900	8724.2	9372.6	15.4	19.3	7.5	9	9.1	10.6	458.2	1133.9
HW03	0.94075	0.765	540100	1083400	10685.8	10153.25	12.9	11.9	8.2	10.7	7	5.6	417.8	800.3
HW04	0.669625	0.5175	572800	565600	14269.75	13186.5	31.3	31.4	10.1	12.5	10	10.1	1178.5	1930.3
HW05	1.0017	0.685	385400	248450	9693.55	6425.6	25.9	22.7	8.5	7.7	8.1	7.5	545.8	1272
HW06	1.10075	0.7725	702150	819400	8118.5	8308.9	42	48.4	7.7	9.4	6.4	6.1	503.7	1146.2
HW07	0.9542	0.8375	842650	670050	9023.85	9991.7	42	47.7	7.7	10.3	7.1	6.5	359.1	1151.6
HW08	0.6691	0.5125	756000	251350	28.95	16.5	4.9	4.9	4.9	4.5	5.2	5.3	44.3	79.2
HW09	0.8679	0.6075	392650	518500	5996.05	4673.5	14.3	18.5	5.2	5.2	6.8	5.9	83.9	139.2
HW10	0.90885	0.725	588500	1083550	5174.8	11993.1	6	5.8	5	4.5	5.3	5.5	56.9	134.5
HW11	1.10725	0.8325	519450	895100	9052.65	3919.8	26.2	13	5.2	4.9	6.3	5.7	295.6	336.1
HW12	1.03625	0.7925	448500	594100	12089	6320.95	106.2	151.2	5.7	5	7.4	9.3	1040.1	2333.8
HW13	0.999	0.6525	643950	747450	6693.6	5397.75	28	24.3	7.7	9.5	7.3	7.7	438.8	757.6
HW14	1.03125	0.94	549850	639750	12081.35	7839.7	47.8	32.4	8.7	9.2	8.8	8.5	445.1	819.8
HW15	0.92575	0.725	459150	562550	7803.2	5829.85	20.2	12.1	7	5.4	6.9	6.5	287.9	496.5
HW16	1.10475	0.7375	838600	369350	8652.85	8697.9	50.4	34.2	7.9	9	7.5	6.7	603	1025.1
LW01	0.3025	0.33425	123350	94800	7.25	2982.75	6.1	13.9	4.7	5.7	5.3	5.7	53.7	527.5
LW02	0.31575	0.4225	83700	36650	6.75	2492.5	4.9	13.2	4.6	5.3	5.2	5.7	47.9	530
LW03	0.3225	0.3325	104000	62200	516.5	1806.2	9.1	13.6	5.8	5.5	5.7	6.3	275.8	185.6
LW04	0.3825	0.4075	234100	77850	1600.5	2383	10.5	26	5.2	8	6.5	6.9	316.9	124
LW05	0.2925	0.29325	172700	314150	10.55	3836.3	4.6	32.1	4.7	5.3	5	5.9	47	591.1
LW06	0.45	0.31025	135550	182850	8	2272.7	6.5	16.1	5.1	5.3	5.4	6.2	78	401.7
LW07	0.53175	0.4175	45800	112050	8.65	4138	6	15.3	4.8	5.3	5.6	5.7	67.5	439.6
LW08	0.44	0.4075	97500	54600	20.85	3554.8	5.2	11	4.8	5.3	5.1	5.6	47.4	282.1
LW09	0.365	0.38	153900	69050	710.85	2591.9	12.9	12.6	9.1	5.8	6.6	6.2	53.3	251.8
LW10	0.385	0.2445	129050	161800	3287.6	3271.7	27.2	24.2	6.7	6.2	5.8	6.1	425.6	744.2
LW11	0.4025	0.4525	60300	44700	2929.05	3437.4	9.5	11.1	4.7	5.2	5.3	6	441.3	593.5
LW12	0.4025	0.4125	163450	143550	293.75	3315.25	7	13.5	4.9	5.2	5.5	5.8	93.6	403
OWW01	0.39425	0.2525	107500	199250	5909.6	7428.35	194	19.7	5.6	6.9	6.1	5.9	318.3	826.8
OWW02	0.271	0.385	829950	91150	4776.9	5829.75	60.8	14.2	5.5	6.1	5.9	5.8	84.3	265.2
OWW03	0.232	0.3275	98350	111450	5155.3	7667.1	194.5	36.8	7.4	11.8	9.1	7.4	214.6	797
OWW04	0.25525	0.415	57050	129550	3914.2	5408.15	103.2	20.5	6.7	6.6	5.8	6.8	176	553.5
OWW05	0.28875	0.45	67700	67850	3748.65	7455.5	190.2	40.1	6	11.1	5.8	6.4	151.9	652.1
OWW06	0.41725	0.498	123650	181700	3952.35	7929.95	25.1	21.1	6.5	6.8	6.2	7.3	151.8	366.9
OWW07	0.50875	0.55	168650	304850	5951.4	5600.45	133.9	19.2	9.2	8.2	6.9	8.7	169.8	517
OWW08	0.35625	0.4875	75500	201900	2853.65	4945.65	174.6	19.3	4.7	5.1	5.1	5.9	90.2	620.1
OWW09	0.57475	0.4425	133150	158850	4092.05	6909.05	61.4	17.7	6.5	6.8	5.3	5.8	205.8	405
OWW10	0.48075	0.615	179550	226900	5257.15	6158.65	130.2	21.5	5.7	6	5.9	6.1	109	360.5
OWW11	0.2195	0.358	108400	56700	3737	5816.8	45.8	21.6	5.8	5.7	5.5	7.3	129.7	283.8
OWW12	0.1595	0.3415	14750	46350	3738.55	8281.5	61.6	19.4	6.8	7.1	6.4	5.6	148.9	393.8
OWW13	0.25225	0.4475	196150	329750	6320.95	7326.75	273.4	22.5	6.5	9.2	6.9	7.2	183.9	1058.8
OWW14	0.1305	0.29	90250	144650	4211.65	6487.85	122.3	64.7	17.2	28	14.8	6.3	168	404.2
OWW15	0.216	0.3725	126400	219750	4163.6	4489.15	87.5	34.9	10.2	18.3	6.4	7.9	121.7	529.2
OWW16	0.2225	0.52	63400	166500	4679.85	5151.15	158.6	19.6	5.9	5.6	6.1	6.6	314.8	696.3
PH01	0.22625	0.45575	2900	119750	2568.1	2849.15	7.5	5.7	6.1	5.4	5.4	5.8	230	265.6
PH02	0.15625	0.4325	2950	61400	8857.65	11676.45	5.9	7.9	5.2	5.5	5.4	5.7	775.8	1031.4
PH03	0.146	0.4625	2450	68050	1308.2	1433.3	6.9	5.5	7.2	6.4	5.4	5.6	175.6	164.9
PH04	0.26875	0.30275	4350	73850	8.2	2415.05	5.2	21.1	5.2	5.8	5.4	7.1	117.3	436.6
PH05	0.26775	0.34225	6250	96750	11.2	3338.75	4.7	16.3	4.6	6.4	5.2	5.7	45.9	427.6
PH06	0.203	0.35375	3100	127800	93.9	3425.9	4.8	15.3	4.6	5.2	5.4	5.7	45.5	439.6
PH07	0.1455	0.294	2500	129850	20.85	3851.05	6	15.5	5.4	5.4	5.6	5.5	235.9	387.6
PH08	0.13425	0.31825	3150	87750	8238.75	7358.55	6.9	15.1	6.7	6.3	5.3	6.2	1067.1	1753.3
PH09	0.13025	0.4405	2350	131050	12.2	3187.35	8	33.3	4.7	5.3	5.4	6.9	56	383.3
PH10	0.15075	0.34775	2600	68250	9.3	3499.75	17.4	18.3	5.5	5.3	5.7	5.8	51.9	472
PH11	0.1855	0.32	2950	90300	103.5	3671.65	5.2	21.8	5.1	5.4	5.3	6.1	146.5	428
PH12	0.15075	0.3375	3550	136550	7.4	4201.55	5.5	15.1	4.6	5.5	4.9	5.7	47.7	478
PH13	0.14175	0.3035	2300	166650	2746	4703.95	9.6	8.5	5.7	7.6	9.6	10.2	392.5	283.3
PH14	0.13525	0.33075	3250	96500	1545.85	2313.95	6.6	6.7	5.3	5.2	5.2	5.6	387.3	279.6
PH15	0.125	0.30225	4950	116350	748.6	3495.05	6.3	11.9	4.8	6.4	5.4	5.6	217.8	236.1
PH16	0.1095	0.302	2500	94000	7.9	2828.2	7.7	20.2	5.6	5.3	5.3	6.2	98.8	473.3
PH17	0.09525	0.2425	1550	221500	279.2	2977.05	8	27.1	5.4	5.7	5.4	7.8	222.5	296.3
PH18	0.101	0.25875	2450	150400	257.25	3993.1	4.7	12.9	4.4	6.2	5.2	5.6	46.5	407.5
PH19	0.1025	0.276	2400	85900	9.85	2998.05	4.8	10.8	4.9	6.3	5.3	5.6	49.1	338.4
PH20	0.1025	0.17725	4250	184350	4151.4	4370.35	45.4	55.5	43.3	51.8	5.5	6.3	447.3	548.1
PH21	0.098	0.15525	2550	229850	10.1	3087.05	5.5	44	4.8	5.7	5.1	7.3	120	430.8
PH22	0.1155	0.15925	3600	187900	820.55	4103.45	4.8	11.3	5.1	5.2	5.4	5.8	48.7	384.8
PH24	0.08325	0.148	2700	100150	563.6	3675.2	4.8	11.5	4.6	5.8	5.6	5.7	47.9	384.1
SAC02	0.163	0.25	1650	13450	1672.65	2157.7	7.8	12.1	6.4	6.4	5.4	6.7	300.6	368.6
SAC03	0.2045	0.2135	1400	24950	955.4	2019.4	4.7	6.2	4.9	5.2	5.4	6.5	33.6	299
SAC04	0.2275	0.2825	1500	9250	991.4	2150.65	5.5	6.4	5.5	6	5.2	6.6	40.3	82.9
SAC05	0.17475	0.187	1500	2400	3191.6	7067.65	20.3	26.9	10.5	11.9	6.3	8.1	446	996
SAC06	0.17525	0.235	2200	3700	3764.2	8948.55	6.6	11.8	5.1	6.1	5.6	6.2	205.8	736.7
SAC07	0.14525	0.15	3350	5050	8315.65	11439.35	19.2	28	5.1	5.2	5.9	7.7	421.8	1162.7
SAC08	0.191	0.275	12650	70650	821.3	2557.05	9.7	7.8	6.4	5.7	5.3	6.3	689.3	840.6
SAC09	0.076375	0.102	1700	6300	3502.4	3239.5	17.4	23.6	7.8	8.3	6.9	9.3	277.8	509.9
SAC10	0.13425	0.1675	28650	4500	3199.45	6471.45	13.4	23.3	5.1	5.5	5.3	7.3	236.9	416.2
SAC11	0.21	0.16575	1250	8100	2154.9	4822.3	10.4	25.7	7.2	6.7	5.3	6.9	230.2	438.8
SAC12	0.182	0.21025	14600	2000	873.5	3136.8	8	132.7	5.6	34.3	6.2	7.5	141.9	450.7
SAC13	0.15075	0.1885	1800	5800	1613.8	1400.85	22.3	46.6	5.6	5.7	5.3	6.8	170.4	242.8
SAC14	0.18125	0.1905	5400	5450	685.8	1044.45	5.5	8.8	5	5.6	5.4	6.5	135.9	372.2
SAC15	0.12675	0.16275	20300	14600	2108.45	2693.15	6.8	9.3	6	6.1	5.6	6.7	282	134.8
SAC16	0.1835	0.2265	4550	19350	8631.2	1948.65	8.1	27.5	8.7	26	5.3	17.7	71.6	183.4
SNG01	0.30308592325	0.376817677	208700	197550	903.85	3352.45	13.5	32.6	4.9	5.2	6.4	10.2	184.6	319.6
SNG02	0.32203219725	0.344942993	173150	285900	3933.75	4803.9	74.1	33.8	4.9	5.2	7.3	7.7	438.5	542.7
SP10	0.31176303875	0.35121793725	181700	228300	12511.4	8461.2	18.6	15	8.3	8	8.8	8.7	246.6	541.8
SP11	0.3902731525	0.55658263475	404000	456600	9699	5320.25	44	36.8	6.3	7.5	9.4	12.3	147.9	244.9
SP12	0.30780103775	0.44097646	376300	217750	4241.85	3588	25.4	40.1	7.1	6.7	8.5	7.7	113.5	465.3
SP13	0.30600954325	0.50562731725	179750	239500	5361.5	7320.75	10.4	35.9	5	6.7	7.4	7.3	388.7	1331.9
SP14	0.29428861775	0.4581968455	394950	341250	2361.5	3921.65	25.3	23.2	6.6	6.2	7.7	7.4	170.7	392.8
SP15	0.3060777535	0.49260701975	343900	302700	6259.35	11113.25	22	19.1	7.3	11.8	10.6	10.4	1347.3	2913.1
SP16	0.204359991	0.37069912325	1461300	1545100	2328.95	4296.8	20.1	62.4	6.2	5.7	6.7	10.2	234.7	754.5
SP17	0.2085605935	0.411051695	690950	946650	14057.45	10894.15	28.9	22.2	5.3	10.5	9.1	10.7	414.4	825.9
WEL01	0.13075	0.36225	2300	122100	4141.35	4528.45	9.7	10.6	7.2	5.2	5.4	5.8	131	154.7
WEL02	0.2625	0.31725	82850	31450	13	2836.85	6	23	4.8	6.3	5.4	5.8	190.9	507
WEL03	0.15975	0.371	1600	73750	7938.75	2322.7	365.8	18.9	6.5	6.1	29.3	5.8	836.4	418.5
WEL04	0.17825	0.375	1700	129400	87.05	2450.2	14.5	17.6	6	6.1	5.7	5.9	61.6	450.2
WEL05	0.16225	0.3595	2100	91750	2446.6	3036.8	7.2	6.5	5.1	4.9	5.5	5.5	298.9	367.5
WEL06	0.14875	0.3305	2050	98350	1901.25	2542.95	8.3	8.2	6.9	5.2	5.5	5.5	200.8	317.1
WEL07	0.17075	0.286	2350	96900	3748.65	7278.1	7.8	8.6	7.1	6.9	5.6	7.1	216.7	765.8
WEL08	0.1575	0.37825	1850	117600	395.75	2105.25	14.3	21.3	8.2	5.6	5.5	6.8	212.1	369.1
WEL09	0.10775	0.36525	2450	96600	14.45	4203.3	8	14.6	5.4	5.4	5.6	5.6	138.8	527.1
WEL10	0.13875	0.4825	2550	163600	13715.85	5379.2	4.9	10.7	4.7	5	5.3	5.7	52.9	521
WEL11	0.1465	0.41	1750	106150	14.6	3179.95	5.7	16.8	4.8	5.2	5.5	5.5	91.4	515.3
WEL12	0.17	0.26025	98550	184650	1610.8	2681.05	7.6	9.1	5.2	5.8	5.4	5.7	262.1	301.7
WEL13	0.1995	0.3025	96100	87700	4425	5030.3	26.4	30.7	12.3	7.9	6.4	7.3	266.3	445.1
WEL14	0.176	0.35	2950	139350	383.8	2525.5	198.3	18.4	5.6	5.7	5.3	6	51.5	437.4
WEL15	0.138	0.339	3650	174350	74.35	3911.85	4.9	18.3	4.6	8.7	5.3	5.6	48	505.3
WEL16	0.12925	0.32675	1950	103550	74.15	3591.3	4.7	13.6	4.7	5.4	5.3	5.8	48.6	422.6
WEL17	0.1125	0.37075	1800	168950	5509.75	5304.4	19.2	24.9	16.9	23.8	5.5	6	632.4	850.6
WEL18	0.20225	0.33675	13650	40300	30.75	3128	7.4	44.7	7	67	5.3	6.9	52.7	509.7
WEL19	0.1525	0.35025	2250	136400	2318	3802.7	12.8	18.2	4.9	5.4	5.5	6	81.4	149.5
WEL20	0.14875	0.3415	2900	195750	9.45	1533.95	4.8	10.1	4.8	5.2	5.3	5.8	47	281.6
WEL22	0.14675	0.35025	5950	211600	15262.2	7204.95	4.9	29.7	4.6	23.7	5.3	6.2	46.9	390.9
WEL23	0.137	0.3005	2800	212550	68.4	3075.3	5.6	20.9	5.2	5.4	5.6	6.1	105.9	330.4
WEL24	0.12275	0.316	2200	144100	2922.7	3173	16.3	18.2	9.1	9.8	7.6	8	543.9	1050.7
WEL25	0.23025	0.455	14850	97250	1316.7	1809.25	8.7	6.2	6.1	5.3	5.6	5.7	125.9	277.4
WEL26	0.1955	0.346	98450	342150	455.3	2378.75	7.6	19.3	10	6.4	5.7	6.2	53.7	288.2
WF01	0.192	0.265	20800	64150	7577.7	6618.55	143.3	15.2	6	5.2	5.8	5.9	154.1	675.7
WF02	0.33725	0.465	48750	134450	8802	5233.15	37.3	15.7	5.8	5.5	5.5	5.5	121.9	257.6
WF04	0.23075	0.42	38350	90700	4447.2	3709.8	127.7	45.5	32.6	26.2	8.1	8.5	130.5	332.1
WF05	0.19775	0.375	170250	112750	4881.7	3660.4	26.4	18.3	6.4	5.7	6.5	6.6	87.5	136.9
WF06	0.21075	0.365	79650	103350	2081.25	3428.85	23.2	15	5.2	5.4	4.8	5.3	246.7	309.3
WF07	0.1976175	0.3475	92600	100700	9199.8	5909.5	126.6	50	12	14	7.6	8.8	365.3	502.5
WGP01	0.0367	0.175	110000	760650	5377.65	4859.8	236	6.4	5.3	5	5.3	5.3	775.2	568.3
WGP02	0.058275	0.24225	39550	215400	16.8	4929.4	13.7	9.7	5.1	5.2	5.1	5.5	32.8	267.1
WGP03	0.03350000085	0.26025	4100	125550	2320	5564.8	69.1	9.5	5.3	5.8	5.2	5.4	46.9	390.4
WGP04	0.068225	0.2215	67650	445900	13.85	1949.6	13.8	48.4	5.1	6.5	4.8	8	32	214.9
WGP05	0.060575	0.2375	335200	833950	1739	5331.2	14	13.8	5.9	6.2	5.1	5.4	31.8	237.4
WGP06	0.062475	0.1885	47700	180000	1594.9	1437.5	395.9	15.6	8.8	10	8.2	6	311.3	500.5
WGP07	0.0473375	0.21425	8050	167750	1187.65	1787.45	14.8	10.5	5.7	6.4	5.1	5.8	32	92.1
WGP08	0.0637975	0.1395	137800	250500	1378.5	2062.75	14.9	8.2	7.5	9	6.6	5.5	32.5	74.2
WGP09	0.06975575	0.3035	17450	126100	9.45	1908	14.2	32.6	5	5.6	4.9	7.6	32.6	195.7
WGP10	0.130475	0.3175	225450	579700	1564.3	2978.65	26.2	76	7.2	36	6.1	7.5	57.8	219.1
WGP11	0.05539	0.30825	15900	167750	1442.85	1922.4	15.2	17.9	7.4	10.4	5.1	5.6	94.7	440
WGP12	0.126475	0.35525	12450	265450	2000.45	4810.75	120.2	28	5.7	6	5.1	5.9	150.6	433.4
WGP13	0.13525	0.325	40550	119350	9.05	3009.5	13.7	58.7	5	5.5	5	7.6	32.8	255.4
WGP14	0.204	0.32	200333.333333333	390533.333333333	1661.8	2486.6	17.2	9.33333333333333	5.06666666666667	5.6	5.2	5.2	23.6	190.4
WGP15	0.175666666666667	0.31	60933.3333333333	227066.666666667	2730.73333333333	2224.93333333333	100.8	40.8	5.33333333333333	5.86666666666667	5.6	6.4	105.6	201.2
WGP16	0.0893333333333333	0.226	47200	102733.333333333	9.53333333333333	3532.86666666667	17.2	12.1333333333333	4.93333333333333	9.73333333333333	4.66666666666667	5.6	22.9333333333333	241.2
WGP17	0.11305	0.24925	95400	261850	1074.55	3910.85	46.5	21.3	5.5	6.4	5	5.9	32.9	195.8
WGP18	0.136	0.242	93550	505300	894.2	4914.65	47.6	35.8	5.1	5.7	5.7	6.7	43	216.7
WGP19	0.214	0.35	80950	169100	3183.85	5668.7	21.8	22.4	5	4.6	4.8	5.8	41.3	135.3
WGP20	0.0843	0.3275	58950	158600	517.45	3501.5	14.1	32	5.2	5.8	4.9	6	32.3	198.5
WiW01	0.292	0.31125	102600	280400	3012.15	4963.15	7.7	10.8	6.2	6.8	5.6	9.9	496.2	1322.1
WiW02	0.421	0.55	104500	206450	4590.1	11236.7	11.1	19	6.9	8.7	5.8	9.1	288.1	777.6
WiW03	0.54225	0.6175	145950	188950	4059	6431.8	13	15.3	8.9	10	5.7	7.4	84.8	176.6
WiW04	0.4575	0.515	79200	75300	4570.55	7047.6	8.2	14	7.2	7.3	5.4	7.9	148.4	451.2
WiW05	0.45725	0.5375	130450	159800	4714.8	4704.25	11.6	14.5	5.9	6.1	7.3	9.6	242.7	570.3
WiW06	0.30825	0.315	28550	49000	1970.85	4272.85	16.3	43.5	5.1	4.8	5.9	6.8	176.1	500.7
WiW07	0.28225	0.3225	30350	59600	3798.55	6745.4	5.3	7.1	5.1	5	5.3	6.5	142.7	454.9
WiW08	0.2925	0.3175	57000	134400	3213.25	2620.55	13	12	6.1	5.6	7.2	8.1	172.9	432.9
WiW09	0.32775	0.315	95600	333950	6382.85	4441.85	8.2	12.1	6.2	6.2	5.2	6.3	132.5	297.4
WiW10	0.37	0.4325	302800	432400	3428.7	3618.6	9.3	20.7	53.9	7.2	5.5	6.7	244.7	288.3
WiW11	0.4	0.4425	38500	113550	1330.3	1099.3	4.5	10.7	4.8	5.1	5.4	6.7	62.8	159.8
WiW12	0.4035	0.455	30650	36200	1179.4	383.1	5.1	6	5.1	5.5	5.4	6.5	261.9	96.8
WiW13	0.39425	0.445	86200	129350	3028.9	6850.7	10.1	64.1	6.2	5.6	5.3	6.6	215.4	542.7
WiW14	0.3595	0.415	109700	108200	4328.65	9905.7	8.4	17	5.1	5.5	5.3	6.8	425.5	1251.1
WiW15	0.35025	0.4275	101350	119950	1258.4	2828.35	6.3	8.2	5.2	5.4	5.7	6.3	41.9	88.1
WiW16	0.28375	0.27625	149300	159150	570.25	2036.7	5.5	13.1	6.4	7.2	5.6	7.1	42.8	324
WiW17	0.22925	0.2635	117950	349700	2446	5211.15	7.9	12.1	7.6	8.7	5.4	8.4	204.8	591
WiW18	0.237	0.2675	23450	75700	2413.45	7135.05	5.8	7.5	5.1	5.4	5.1	6.4	53.7	92.4
WiW19	0.45625	0.51	212850	233050	2435.85	5821.3	5.6	7.4	4.9	5.3	5.5	6.3	219.7	419.3
WiW20	0.30375	0.385	333400	184250	673.55	2294	6.2	11.7	5.4	6	5.5	7	83.2	152.1
WiW21	0.28825	0.37	30600	45450	4035.2	9639.1	6.1	10.4	5.8	6.5	5.5	6.5	344.2	590.8
WiW22	0.54825	0.585	117800	143450	1998.35	4948.7	7.8	13.1	5.3	5.9	5.5	6.9	215.4	749
WiW23	0.31475	0.3775	166100	180800	457.65	1214.4	6.5	8.1	5.3	5.7	5.2	6.4	276.6	166.6
WiW24	0.3555	0.32	127050	467600	1136.5	843.3	4.9	6.6	4.9	5.2	5.3	6.4	223.1	211.4
WiW25	0.2805	0.3	160250	170300	3167.1	5930.9	66	111.4	5.9	6.4	6	7.1	211.7	439.8
WiW26	0.33425	0.3775	136200	153050	2764.45	4471.6	8.7	17.2	5.4	5.8	5.3	6.4	411.7	932.8
WiW27	0.48725	0.575	88850	145950	4968.65	6432.55	12.2	15.3	9.7	7.6	5.7	7	194.5	662
WiW28	0.38025	0.4975	69600	58850	1827.75	6511.45	7.3	16.6	6.9	9.3	5.7	7	118.8	526.6
WiW29	0.49275	0.575	71350	66800	1998.95	1476.4	7.3	7.6	6.5	6.2	5.4	6.5	66.7	207.2
WiW30	0.29975	0.278	110100	1059650	1934.75	6673.95	19.3	41.8	6.1	7.1	12.2	19.9	156.4	409.6
WiW31	0.37	0.395	69600	96400	1532.2	5462.4	6.6	9	6.6	6.1	5.7	7	62.8	316.1
WiW32	0.26425	0.26	29250	33300	2610.6	5059.75	5.9	197.7	5.4	27	5.6	9.3	135.9	348.7
WiW33	0.271	0.3175	230200	306400	3814.3	6652.8	13.4	20.5	6.2	6.6	5.8	7.2	459.4	707.7
WiW34	0.27225	0.3475	76100	101750	2175.45	3540.25	6.7	11.3	5.2	5.5	5.3	6.8	138.6	387.4
WiW35	0.31775	0.4125	22600	42100	1285.1	975.2	5	8.1	5.1	5.3	5.3	6.6	98.8	184.3
WiW36	0.3515	0.4825	72650	90900	87	170.55	4.8	5.7	5.6	6.1	5.4	6.4	36.6	81.3
WiW37	0.394	0.49	80400	91550	4373.45	5767.75	8.6	16.4	7.9	8.6	5.4	6.7	264.8	398.9
WiW38	0.3035	0.445	132150	341850	1675.7	2693.25	6.6	9.4	5.1	5.4	5.5	6.9	145.3	278.6
WiW39	0.34925	0.41	87850	78000	6532.5	6652.1	6.5	7.5	5.3	5.1	5.3	6.8	108.3	291.2
WiW40	0.25525	0.3	60100	125800	1991.55	2341.9	6.4	11.8	5.8	5.7	6.6	6.8	273.1	499.4
WiW41	0.24825	0.3075	184100	203000	4396.7	5037.05	9.5	15.3	5.5	5.8	5.3	6.5	432.1	579.5
WiW42	0.34025	0.415	74350	229450	3636.95	6125.5	11.5	16.6	5.6	5.6	5.9	6.9	269	644
WiW43	0.343	0.3925	93300	290350	1672.45	4196.1	8	10.6	6.6	7.3	5.3	6.5	68.2	330.1
WiW44	0.28075	0.355	322350	299800	2040	2348.6	17.6	28.5	13.2	15.3	6	8.2	168	233
WiW45	0.3495	0.47	185800	289300	1121.2	1065.85	5	6.3	5.2	5.4	5.3	6.1	81.5	352.1
WiW46	0.3215	0.425	175350	149100	711.75	526.45	5.7	6.5	4.8	5.1	5.2	6.2	142.5	167.5
WiW47	0.33075	0.4025	85600	128200	1697.95	3834.95	5.3	49.1	4.8	17.1	5	7.1	40.9	375.8
WiW48	0.32225	0.31	76500	137400	15125.95	1857.4	6.8	29	6.8	11.5	5.5	6.7	57.8	304.1
WiW49	0.22025	0.23575	313450	273750	4496.65	5409.35	7.1	16.5	7.7	7.8	5.3	6.6	281	278.6
WiW50	0.28725	0.395	104550	234000	3303.9	4303.7	8.9	9.3	6.9	6.4	5.6	6.6	197.4	286.5
WiW51	0.3305	0.41	100450	238400	2111.85	2210.25	11.5	10.9	7	6.4	5.6	6.7	299.6	261
WiW52	0.31025	0.3925	43700	44300	3049	4873.45	5.6	13.3	5.2	5.4	5.5	6.6	279.6	443.4
WiW53	0.2285	0.2675	136900	15150	3246.4	3537.7	5.7	7.3	5	5.3	5.2	6.5	250.7	303.1
WiW54	0.34775	0.395	88550	319600	2860.3	3417.7	9.8	17.9	5.5	5.7	5.2	6.7	200.3	420.2
WiW55	0.34775	0.3525	191150	287850	4006	4751.6	5.3	13	5.2	5.4	5.4	6.7	32.9	244.2
WiW56	0.253	0.25	106350	105450	897.45	3201.25	5.9	81.4	4.9	13	5.4	7.5	105.3	277.4
WiW57	0.2635	0.325	163950	101550	2910.95	3853.1	10.3	14	6.3	6.9	5.2	7.6	216.3	413.6
WP01	0.24625	0.29225	120350	89150	3291.6	4678.95	11.7	39.2	5.3	5.8	6.7	9.5	287.1	384.3
WP02	0.22875	0.3175	79050	225350	1214.55	1971	9.3	11.8	6.7	5.6	5.6	6.7	223.6	318.6
WP03	0.40175	0.4	107300	292950	2659.35	6735.5	8.2	17.5	5.5	5.6	5.4	7	110.1	407
WP04	0.2725	0.38	18750	19300	1379.75	4958.95	7.4	12.6	5.2	5.7	5.5	6.4	170.1	456.1
WP05	0.306	0.4225	117000	180100	4921.15	5759	8.9	11.5	7	8.3	5.5	6.6	341.7	701.4
WP06	0.29775	0.405	165600	278050	2937.6	2063.55	6.5	12.7	5.4	7.3	5.5	7	124.6	390.6
WP07	0.2795	0.375	85250	111950	2058.55	1878.35	5.9	9.2	5.7	6.3	5.4	6.8	39.6	95.6
WP08	0.14625	0.1575	78700	52750	4750.55	11885.1	5.2	7.9	5.2	5.7	5.3	6.5	55.1	132.7
WP09	0.194	0.30325	244500	100850	4251.2	3680.35	8.8	14.4	5.6	6.1	5.5	7.3	138.9	316.5
WP10	0.34525	0.485	45950	139650	4211.4	2518.05	19.1	29.6	5	5	5.5	6.7	517.6	610.8
WP11	0.3615	0.44	41600	71600	6819.45	4118.9	5.9	10.2	5.4	5.4	5.6	6.7	88.9	213.2
WP12	0.18675	0.2085	1550	3950	6362.4	7264.05	6.5	9.7	5.5	5.3	5.4	7.3	498.3	598.5
WP13	0.1925	0.20925	39550	4900	5109	4871.5	21.7	44.7	5.8	5.7	5.3	6.8	250.1	408.1
WP14	0.259	0.4475	23300	32100	1686.65	3305.4	21.1	20.2	20.1	14.1	8	10	164.2	277.9
WP15	0.1615	0.2575	2200	7150	5258.3	8118.9	12.9	16.2	8.3	7.6	5.3	6.4	210.7	492.2
WP16	0.11835	0.13475	2100	14300	2151	2708.6	7	9.3	5.4	5.4	5.3	6.3	193.1	418.9
WYC01	0.7731060205	0.57736911775	55900	53200	9952.05	9019.7	11.9	8.8	5.2	5	5.3	5.8	204.5	130.3
WYC03	0.72068094125	0.40263268975	56750	28500	34.55	3698.1	7.3	29.9	4.8	15.6	5.6	7.4	47.5	506.7
WYC04	0.9980817965	0.586135105	147500	66700	71.75	3262.45	29.8	295.7	4.6	5.3	5.3	8.5	72.4	275.9
WYC05	0.719829291	0.562691488	49750	24900	6217.45	4819.95	23.4	21.9	6.5	7.7	5.4	6.3	285.9	607.1
WYC06	0.57780750475	0.407529078	268000	69650	170.1	4159.2	7	18.9	4.5	7.6	5.2	5.8	70.8	420.9
WYC07	0.79483935975	0.463035815	77700	53900	2372.75	2656.8	17.4	10.4	5	5.1	5.6	5.6	93.2	648.7
WYC08	0.63139771175	0.414323975	56400	91450	1027.2	2013.3	14.8	7.2	5.5	7.5	6.1	5.5	196.7	514.5
WYC09	0.84646614175	0.55258446475	59200	53800	2173.95	1237.95	14.3	11.4	8	7.1	5.9	7.2	90.7	165
WYC10	0.801816238	0.50238859475	44350	12650	5490.45	3168.3	13.6	6.7	15.5	21.8	6.4	6.9	86.3	136.4
WYC11	0.68105859625	0.39508494675	134250	66650	10502.6	8866.7	19.9	11.5	4.9	7.3	6.3	6.1	48.4	206.6
WYC12	0.728142604	0.492297942	187650	93350	1244.65	4772.7	5.7	10.2	4.6	5.1	5.3	5.8	41.9	202.3
WYC13	0.839446795	0.61868002525	47150	11950	5536.05	7327	25.1	33.6	7.3	13.5	7	10.8	228.5	468.1
WYC16	0.522431031	0.40411316525	41900	121400	6849.5	6868.5	18.8	12	7	8.1	5.9	6.6	71.7	219.3
WYC17	0.208778123	0.42022717725	66350	138200	2395.45	3294.55	8	11.5	4.9	5.1	5.7	6.6	63.4	231.9
WYC18	0.72421233825	0.495215187	94700	31200	14.6	3122.6	4.7	14	4.5	5.3	5.3	5.7	56.6	317.1
WYC19	0.6365659755	0.38396842125	134000	173850	5498.25	5819.95	17.5	13.4	12.1	15	5.7	6.4	50.8	107.8
WYC20	0.6652262025	0.37950715625	126500	176750	4828.55	3814.35	11.5	23.8	4.4	7	5.3	7.8	185.6	284.8
WYC21	0.769190292	0.42369752525	37900	16250	2951.7	3600.35	9.3	8.9	10.4	12.8	5.4	6	156.1	104.9
WYC22	0.59756369775	0.4117079845	14750	21250	2289.75	2300.75	19.2	15	4.9	5.6	5.8	6.9	133.5	288.5
WYC23	0.557913587	0.4476604725	203250	273650	9930.15	3821.55	17.4	17.4	5	6.5	6.4	8.1	62.9	212.9
WYC24	0.8914299595	0.451887415	116300	82950	1691.25	4846.55	18.1	23.3	5.4	9.1	5.2	5.8	54.1	645.4
WYC25	0.68017476125	0.56612131875	127500	99200	3410.7	4118.3	17.9	15.5	8.5	12.7	6	6.4	199.7	317.2
WYC27	0.78483962325	0.5134083575	79300	81500	6948.85	6681.25	18.1	12	8.7	10.1	6.1	8	156.8	338.8
WYC28	0.70443872375	0.43528814125	2350	82900	6097.35	6567.6	17.7	10.6	5.2	5.8	5.3	5.7	137.1	476.2
WYC29	0.637217562	0.391421358	71800	51000	738.35	4318.85	5.3	10.4	3.8	5.4	5.2	5.6	38.2	308.6
WYC30	0.78894486775	0.53914268875	90250	53350	756.15	3124.1	5.3	18.7	4.9	7.9	5.2	7.8	38.8	298.8
WYC31	0.64763024	0.43713244325	134750	187500	1766.55	2536.6	10.9	9.3	8.4	10.7	5.9	6.3	346.1	896.4
WYC32	0.64563283775	0.46816450775	26350	98200	6594.65	4248.65	30.2	16.6	15.3	9	6.1	8.5	251.7	220.4
WYC33	0.207530576	0.43588014875	28950	46800	8283.35	11380.85	15.3	12.2	5.2	5.1	5.8	5.9	63.1	130.3
WYC34	0.622653922	0.47692403875	1332700	363100	2958.85	4993.75	27.4	34.8	5.5	35.7	5.8	7.4	49.9	417.9
WYC35	0.473285182	0.341163336	140850	146200	4369.55	9143.95	10.3	24.3	5.1	7.9	5.2	6.2	168	865.3
WYC36	0.60819484925	0.39618696125	29300	60650	46.3	5039.9	6.4	26.3	4.7	12.7	5.3	7.9	41.4	501.1
WYC37	0.58651752625	0.350731287	148950	86350	4027.5	2896.75	30.7	28.9	6.7	8.6	8.9	11.3	550.8	1522.6
WYC38	0.63969706	0.4232646915	299550	72050	5501.1	6071.35	12.6	13.1	5.3	6	5.6	6.3	239.8	711.3
WYC39	0.596121346	0.3284314915	242050	222250	4975.1	4355.2	14.9	7.7	4.5	5	6.1	6.2	214.6	346.2
WYC40	0.7567256505	0.32061110925	252800	155650	3952.3	4685.05	17.5	9.6	6.3	8.3	5.4	5.9	80.1	264.9
WYC43	0.52568314175	0.3073446045	221750	126950	5415.55	4062.4	24.8	11.6	5.9	11.7	5.3	6.7	64.1	405.8
WYD01	0.565	0.4025	403150	423400	19.05	7830.2	4.7	20.7	5.8	6.1	5.6	6.2	46.2	1046.6
WYD02	0.5175	0.6175	468900	348000	4538.3	6783.95	39.4	44.6	6.9	7.3	21.1	14.9	64.7	229.1
WYD03	0.56	0.6075	370400	259400	13.55	1614.8	4.8	9	6.2	6.5	5.2	5.4	49.6	225.5
WYD04	0.4225	0.5125	277900	232350	7828.8	5610.9	7.9	13	4.8	6.1	6.8	8.2	64.7	202.9
WYD05	0.3825	0.4775	251250	208950	7396.2	7460.5	53.6	54.8	5.5	5.6	6.4	7.4	359.5	537.4
WYD07	0.4725	0.5825	392250	284100	8107.2	8004.15	17.3	15.2	5.6	6.2	5.6	5.8	555.4	1428.7
WYD08	0.37825	0.47	295100	288250	8782.35	4764.3	14.9	9.2	5.1	5	5.4	5.8	652.2	688.9
WYD10	0.4075	0.5725	275100	299650	11647.7	4786.8	22.3	12.7	5.8	5.2	5.9	5.7	820.3	875.3
WYD11	0.4675	0.6375	321250	165600	10407.2	6221.2	23.2	13.2	5	5.2	5.3	5.5	776.6	747.6
WYD12	0.36	0.5975	338950	234500	223.1	2468.35	8.1	28	4.6	5.2	5.3	7.2	53.5	231.7
WYM01	0.544893452	0.657846768	134250	67500	7695.35	4763.2	24.9	14.5	5.8	5	5.4	6	209.4	477.8
WYM03	0.68622428225	0.6174621415	92250	33150	6782.65	4295.05	12.6	14.2	6.6	7.5	5.5	5.8	176.2	345.1
WYM04	0.74520181175	0.49487667225	48800	45200	132.65	4966.1	6.6	16.2	4.6	5.9	4.9	6.4	188.6	251.1
WYM05	0.77933676375	0.568049829	363750	369200	16.6	5563.1	4.5	13	4.3	4.5	4.6	5.8	39.2	334
WYM06	0.6743174405	0.55771461175	126450	73800	5786.55	5779.2	14.5	14.3	5.5	6.5	5.3	6.1	88.1	275
WYM07	0.69747671525	0.5400121875	86900	63900	5202.15	4580.4	19.1	16.5	5.7	5.5	5.2	5.7	132.7	292.8
WYM08	1.00407373675	0.58524248675	106700	100550	4181.65	4676.75	21.9	20	5.5	6.3	6.1	9.9	88.9	405.4
WYM09	0.67502452825	0.72820930075	67450	33650	8410.1	8401.95	11.6	8.2	6.2	6.2	5.6	6.3	133.5	127.8
WYM10	0.74464434325	0.5917161135	93950	59400	4830.45	2689.8	48.8	35.6	4.7	4.7	5.5	5.8	274.2	592.4
WYM11	0.6965221385	0.602928615	60750	38100	7154.85	7065.1	5.7	504.8	4.4	12	5.1	5.8	42.6	254.4
WYM12	0.68065847875	0.555943444	78400	45450	3938.65	5872.25	12	14.3	5.6	6.4	4.9	6.8	59.9	303.1
WYM13	0.75412722025	0.59318956175	168050	75600	780.75	3790.7	34.1	61.5	4.3	4.9	5.5	6.7	39.2	234.5
WYM14	0.6782274475	0.48374397675	259950	54650	6345.6	6473.3	20.8	18.9	4.8	8.3	14.2	18.4	167.4	739.7
WYM15	0.903505494	0.55375785375	180250	134150	8257.1	8335.9	24.9	14.9	5.2	6.5	5.8	6	262.9	514.3
WYM16	0.74260476975	0.50228447225	94150	59300	5725.35	4416.9	25.4	9.7	7.5	7.5	5.6	5.8	208.1	262.9
WYM17	0.80179982325	0.637742248	123050	33650	8620.9	9843.05	21.4	10.9	10.9	9.5	6.7	5.7	266.2	484
WYM18	0.83656293625	0.6110419875	146100	94850	6302.45	4338.8	16.8	10.9	5.3	5.3	5.3	6	310.9	389.8
WYM19	1.08477723125	0.810148863	85650	156550	6284.7	5452.15	13.7	10.3	6	6.5	5.4	5.5	239.9	644.8
WYM20	0.94127376475	0.562842435	291300	289300	1394.65	1262.05	11.6	7.1	5.9	6.1	5.3	5.5	75.8	155.4
WYM24	0.906720054	0.490583376	99950	41350	1249.9	4991.15	11.5	16.4	4.9	6	5.4	5.8	44.4	545
WYM26	0.799410198	0.561159932	107800	44350	4621.9	3321.15	7.7	16.1	4.7	11.2	5.4	5.9	158.3	115.5
WYM28	0.85552269175	0.529942901	198550	234100	839.6	4048.85	5.1	13.6	4.3	5.5	5.2	5.9	39.1	241.3
WYM30	0.7946764865	0.51720694325	161150	68550	2587.55	2850.6	13.6	13.2	6.2	8.3	5.5	6.3	256.6	463
WYM31	0.85504217775	0.56674684075	218800	108400	2254.35	2558.15	6.2	6.6	4.6	4.9	5.4	6.2	274.2	721.2
WYM32	0.77608999375	0.59125608075	112500	79600	5584.05	5485.05	20.1	19.9	7.2	6.2	5.6	5.8	246.6	166.3
WYM34	0.9958483795	0.6538927085	187150	87650	4199.25	4179.45	29.6	20.7	5.4	5.6	6.2	7.4	227.2	421.7
WYM35	0.801560858	0.560109819	19150	20050	6325.1	7900.35	857.1	1324.6	4.8	5	60.2	98.2	827	2032.6
WYM36	0.9063355455	0.54624895875	316600	147700	8946.6	6957.85	27.7	44.2	6.8	9.8	7.5	13.9	69.1	300.9
WYM37	0.838091315	0.56241959025	145100	61850	3555	5754.1	22.1	33.3	6	7.4	6.2	6.5	138.2	237.6
WYM38	0.74967898725	0.381505204	53100	33950	4464.45	2903.95	9	11.6	8.4	11.4	6.2	6.8	114	89.2
WYM40	0.9196409605	0.478322403	97950	61000	4083.2	2346.8	61.8	23.5	4.9	5.2	6.5	5.7	271.7	846.6
WYM41	0.67216330475	0.542689593	121100	68750	4957.65	5003.9	37.2	20.7	6.2	7.5	6.5	7.5	162.1	673.7
WYM42	0.7829052585	0.5356955225	166250	94450	4976.45	3969.35	4.8	5.3	4.7	4.8	5.7	5.5	70.4	111.6
WYM43	0.84830278675	0.56295190075	53850	40900	3092.65	3024.5	15.6	8.7	4.8	4.8	5.6	5.9	90.1	258.9
WYM44	0.76258081975	0.43875458525	176000	66850	4783.65	3795.8	19.8	11.6	5.4	5.7	6	5.8	129.2	174.9
WYT01	0.21975	0.255	44050	83100	2005.3	2801.15	17.4	8.2	5.1	5	5.5	5.5	275.1	456.6
WYT02	0.2185	0.335	67800	98400	7573.85	7502.8	104.2	20.5	7.5	7.5	5.6	5.4	155.4	359.8
WYT03	0.198	0.3525	85000	73700	12389.25	7395.45	214	23.6	7.2	7.5	9.3	10.6	462.2	826.4
WYT04	0.23775	0.4025	74400	105550	6175.15	5837.05	149.1	17	6.5	7	6.7	6.2	212.2	444.8
WYT05	0.236	0.4475	99050	93150	6517.3	7118.25	186.6	18.1	5.4	6	6.5	6.4	271.8	698.8
WYT06	0.198	0.445	339150	149150	1512.8	2385.15	568.8	7.1	5.4	5.8	5.6	5.5	55.1	1187.7
WYT07	0.245	0.47	294650	264450	6728.75	6683.05	138.8	19.4	8.1	8.2	7	6.9	180.3	450.7
WYT08	0.31525	0.4925	68400	230650	5357.45	5091.25	123.2	13	5.1	5.3	6.8	6.9	196.2	341.3
WYT09	0.224	0.2725	81700	95000	5260.15	5726.7	92.5	20.6	5.4	6.2	7.6	7.8	141.9	487.4
WYT10	0.31125	0.455	101650	177900	2277.25	4232.1	21.2	20.7	5.2	6.5	5.4	6.2	136.6	369.7
WYT100	0.3975	0.605	400850	366250	9968.4	7961.85	48.8	54.7	7.7	13.2	7	7.2	416.6	1326.4
WYT101	0.4275	0.6225	136100	152900	4012.55	6820.4	17.4	46.2	5.9	5.3	5.4	7.9	247.3	546.7
WYT102	0.456	0.3985	174250	144300	12383.8	9348.75	16.5	17.7	5.1	7.7	6.5	7.7	275.6	485.3
WYT103	0.54	0.685	266050	225450	9921.35	7569.7	17.3	15.4	4.8	5	5.6	5.6	587.5	808.8
WYT104	0.44	0.5175	110800	120150	11358.65	10573.65	61.2	132.1	4.9	5.1	6.1	11.3	764.4	2272.4
WYT105	0.5	0.66	217800	179800	15320.4	12178.25	50.1	64.3	11.6	9.8	6.6	6.8	252.4	798.2
WYT106	0.4675	0.685	161100	136650	8856.4	6646.4	51.5	39.8	7.4	7.3	6.7	6.4	450.2	877.1
WYT107	0.39	0.6575	314250	214000	4476.3	6613.35	20.4	24	8.4	13.9	19.8	29.4	153.2	924.1
WYT108	0.30575	0.5275	109900	239600	15.1	2860.95	4.6	12.4	7.8	4.7	5.4	8.4	49.7	256.3
WYT109	0.37475	0.5075	41250	57050	5503.7	5113.95	15.2	75.8	4.6	9.8	9.3	11.5	198.8	813.6
WYT110	0.5075	0.422	360950	375500	7303.8	8236.15	49.7	48.5	5.5	7.2	5.7	7.3	263.5	831.4
WYT111	0.435	0.61	198650	177450	9632.05	7681.15	57	31.2	7.9	5.9	6.7	6.1	1014.8	1160.4
WYT112	0.56	0.745	206200	136400	9048	5185.05	59.3	40.6	6.5	8	9.4	11	730.6	1133.5
WYT113	0.365	0.45	100350	152500	9918.05	6331.7	74.9	45	4.9	5.7	6.8	7.6	576.3	766
WYT114	0.44	0.538	155450	78650	24.45	6602.2	4.8	25	6.2	6.6	5.2	6	48.1	1242.3
WYT115	0.4025	0.5725	249600	268750	7663.1	5753	27.2	22.8	5.4	6.4	7.3	6.8	222.3	434.4
WYT13	0.2725	0.39225	301400	146750	6408.15	5208.95	82.8	22	5.8	6.2	6.2	6.7	298.2	363.5
WYT14	0.17475	0.3	191450	114100	4196.05	3428.4	63.5	21.3	5.1	5.1	5.2	5.4	333.2	628.1
WYT15	0.17575	0.36	121550	123550	7556.25	7198.05	233.2	33.2	8.8	16.5	9.6	7.2	227.3	553.4
WYT16	0.234	0.475	78900	120050	8486.9	7379.85	472.2	17.5	5.9	6.1	6.5	7.4	354.6	974.8
WYT17	0.21075	0.22	220950	101850	4864.1	5079.9	145.4	16.2	7.7	9.2	6.5	5.8	115.5	349.6
WYT19	0.1815	0.31	179350	128150	5153.4	6090.05	124.6	23.9	7.5	6.2	6	6.2	160.6	423.2
WYT20	0.25075	0.395	111600	183900	10212.2	6116.4	235.6	21.5	8	7	6.8	6.1	340.6	463.5
WYT21	0.24275	0.3975	275950	166450	4645.65	5137.75	59.2	26.1	7.4	11.8	6.4	6.1	232.5	251.2
WYT22	0.183	0.31	70700	97350	6278	5174.95	80.6	31.7	5.8	7.7	6	7	232.3	254.4
WYT23	0.201	0.355	130500	132000	5967.05	4913.85	126.8	23.2	10.9	11.7	6.9	7.9	353.4	377.4
WYT24	0.332	0.4525	54600	148700	5893.05	4583.6	135.6	20.4	15.5	10.2	6.8	6.9	205.4	330.5
WYT25	0.233	0.205	59550	75100	8115.5	5106.1	99.1	17.3	6.5	6.5	6.7	6.1	282.6	507.6
WYT26	0.195	0.2945	88150	99400	8177.85	5984.45	148.5	12.4	5.9	6.7	6.8	5.7	223.5	369.1
WYT27	0.28975	0.2925	403400	231050	8990.05	5438.7	157.6	13.2	5.5	5.4	7.3	6.6	293.1	578
WYT28	0.21175	0.3375	87100	79650	9708.45	5748.7	111	38.9	12.3	28.4	22.4	8.5	296.1	322.9
WYT29	0.259425	0.355	283950	263250	5750.7	5778.65	60.2	12.4	6	6.6	5.2	5.6	213.8	301.6
WYT30	0.15825	0.305	411750	115300	3020.65	6161.95	20.6	9.8	5	6.2	5.2	7.6	42.1	262
WYT31	0.20425	0.32625	86200	89600	1952.7	2390.25	25.6	25.3	5.5	11.5	7.6	5.9	201	301.1
WYT32	0.1401125	0.219	77000	113500	5956.4	5801.15	121.6	19.6	6.5	5.7	6.3	6.8	196.2	503.2
WYT33	0.222	0.2075	76500	100700	7716.4	4733.05	112.9	29.2	13.2	9.3	7.5	6.4	197	466.4
WYT34	0.205	0.34	81850	110550	6864.65	7653.35	55	25.6	8.9	14	9.1	7.7	118.3	376.9
WYT36	0.1865	0.35	71650	83000	10125.8	4332.5	96.1	17.3	6.4	6.4	9.8	6.6	208.5	448.3
WYT37	0.23075	0.4	119250	115800	6538.85	4462.9	168.6	13.5	6.3	5.7	5.8	5.4	272.7	468.8
WYT38	0.2215	0.42	166600	99750	6001	4190.75	54.1	19.2	11.6	13.6	8	8	331.1	566.6
WYT39	0.242	0.4225	131000	193050	4337.8	2916	153.6	12.4	6.4	5.8	6.5	5.4	172.1	467.1
WYT40	0.27975	0.3975	75650	244200	1471.1	2026.8	15.6	7.1	4.8	4.8	5.2	5.5	108.1	150.8
WYT41	0.26705	0.305	83050	89350	4163.75	5201.75	56.6	12.9	5.4	5.8	5.2	6.2	146.4	408.5
WYT42	0.2375	0.3575	59300	121000	3231.45	5625.2	67.7	28.4	12.1	14.5	5.8	8.9	95.8	423.8
WYT43	0.268175	0.34	223200	80050	5971.6	5732.05	33.1	25.1	5.4	8.3	6.5	7.2	207.8	348.4
WYT44	0.245225	0.3575	79750	112400	4282.75	4334.8	133.1	24.2	8	9.3	7.3	7.9	157.2	564.7
WYT45	0.236	0.425	215050	91350	4856.05	5264.65	30.9	20.2	7.1	7.1	6.4	7.2	159.6	400.3
WYT46	0.1705	0.357	228850	136350	3781.75	5206.25	155.8	38.3	28.1	24.9	6.5	8.3	75.9	328.8
WYT47	0.1499	0.28025	55700	95700	4604.15	4519.95	131.2	23	6.4	9.9	7.8	7	181.2	494.4
WYT48	0.18025	0.34075	98450	147150	3779.9	2892.55	126.9	10.6	5.6	5.4	5.5	5.6	233.6	344.1
WYT49	0.2325	0.22775	105200	118000	3410.9	3607.85	113.6	28.1	6.2	10.3	7	8	181.7	522.5
WYT50	0.18925	0.33	58850	107850	5478.35	6248.45	21.9	7.6	4.9	6	6	5.4	110.3	158.2
WYT51	0.204	0.345	141550	89400	5109.45	6152.25	89.8	19.7	5.5	5.3	5.4	5.7	148.9	277.3
WYT52	0.214	0.375	90050	135000	2447.65	4583.45	20.4	16.5	5.1	6.5	5.7	5.7	251.3	424.3
WYT53	0.17775	0.3775	229550	175150	4331.85	7062	208.9	20.6	7.3	9.7	7.1	5.7	192.8	426.2
WYT54	0.17275	0.334	108100	86800	4993.15	7129	93.2	29.7	6.5	8.3	5.5	6.5	172.6	417.6
WYT55	0.23225	0.3715	245400	142700	4096.2	6484.2	128.5	35.4	5.9	11.9	8.7	7.3	161	777.3
WYT56	0.23025	0.404	66300	139950	1871.9	4003.5	18.4	16.8	5.2	9.1	8.1	5.8	105.8	188.1
WYT57	0.17835	0.205	46450	104300	5005.2	7117.05	61.1	24.7	5.5	6	6.1	6.6	153.5	417.8
WYT58	0.453	0.45575	180250	222700	4655.5	5146.75	108.4	17.2	6.1	5.2	5.2	5.8	283.1	493.5
WYT59	0.219	0.29525	130850	163650	3918.1	5108.95	113.2	19.9	7	7.2	5.4	6.4	233.7	482.7
WYT60	0.22325	0.315	90500	176750	3040.3	3578.4	25.8	22.2	6.4	12.7	9.9	6.1	85.1	169.4
WYT61	0.2205	0.42275	144700	131400	4104.45	6223.55	77.4	26.5	6	6.8	7	7.7	218.1	465.9
WYT62	0.1965	0.2446	28650	106500	30186.9	18057.3	23.3	37.9	11	557.2	21.1	29.6	53.6	269.6
WYT64	0.3225	0.531	104200	151000	11399.55	10805.3	33.7	28.3	7.4	7.7	6.2	6.6	990.3	2785.5
WYT65	0.12525	0.55275	2650	176300	5658.25	3539.7	23.6	16.9	5	5.1	6.6	6.7	555.4	555.9
WYT66	0.27	0.6475	107050	173100	13.05	5067.05	4.7	5.8	4.7	5.7	5	6.4	47.1	88
WYT67	0.43	0.6675	122200	110500	7055.25	6140	24.9	24.6	5.1	4.6	10	12	426.2	613.5
WYT69	0.4475	0.6175	372000	497550	8676.55	7395.4	24.2	24.6	7.4	8.2	5.8	6	938.3	1784.4
WYT71	0.44775	0.51825	314000	447800	16.55	4892.15	4.7	10.3	4.7	4.8	5.6	5.6	49.6	180
WYT72	0.5525	0.67	288500	163850	9330.65	7119.45	20.3	20.1	8.1	7.4	6.3	6.5	840.4	1848.7
WYT73	0.5225	0.53925	322950	242550	2925.3	3543.4	6.5	8.8	4.6	7.9	6.3	6.5	65.4	184.4
WYT74	0.5875	0.665	468200	212550	50.6	903.4	4.6	12.9	4.5	4.9	5.4	5.7	48.8	249.2
WYT75	0.4925	0.7125	202600	140850	9325.95	10365.55	12.1	14.3	9.5	6	5.5	5.6	911.7	2410
WYT76	0.515	0.625	151600	153100	10799.35	9636.85	28.5	42.1	9.7	16.5	7	8.7	1015.3	3577
WYT77	0.4825	0.6475	310700	371050	356.8	1578.25	12.1	28.4	4.5	4.9	6.6	12.5	49.7	108.1
WYT78	0.5475	0.443	273800	301200	19.6	6141.8	4.6	8.5	4.6	5.8	5.2	5.6	47.5	1432.9
WYT79	0.4625	0.58	296950	231450	8848.55	4073.1	22.1	13.5	6.5	5.6	7.9	6.4	620.2	801.1
WYT80	0.705	0.7725	203900	201500	6608.2	4826.25	15	11.5	5.2	5	5.8	6	538	1052.2
WYT81	0.535	0.635	278250	264000	12493.2	7691	32.4	37	20.5	26.2	7.4	7	616.3	1116.7
WYT82	0.6075	0.6325	336900	181950	11631.85	5860.05	71.9	27.1	11.1	8.8	8.5	6.6	662.7	1027
WYT83	0.555	0.6825	280750	312950	7295.15	7030.85	30.1	29.3	6.4	11	9.9	9.6	740.6	1181.6
WYT84	0.5175	0.57	427950	373250	20.05	5959.55	4.7	18.8	5.4	5.3	5.3	5.9	49.8	1276.3
WYT85	0.4725	0.57	253300	357750	4105.7	3166.8	8.2	10.5	5.1	7.2	6	6.6	63.1	251.1
WYT86	0.443	0.27825	210350	156750	4618.65	12501.35	66.4	79.4	5.1	7.4	6.4	7.4	289.2	992.2
WYT88	0.52	0.525	216900	78200	6814.6	6226.95	12.1	12.2	7.3	8.6	5.8	6.4	420.1	1003.2
WYT89	0.385	0.54	76150	143250	11322.25	8313.15	45.7	41.7	5.5	7	7.4	6.5	568.8	1645
WYT90	0.535	0.53	281050	151100	9590.35	8342.85	27.8	21.8	5.2	5.5	6.4	6.6	319.1	611.8
WYT91	0.5525	0.6525	259250	136000	4222.45	2687.55	37.6	15.1	5.2	5	5.8	5.5	578.9	689.6
WYT92	0.535	0.6375	358700	233100	8238.7	4984.3	29.5	16	5.8	5	5.9	6.3	715.4	1010.4
WYT93	0.4625	0.5275	241900	280000	10010.75	7477.8	26.6	28.4	9	9.3	6.4	7	701.5	1160.6
WYT96	0.445	0.5725	140050	171700	11081.3	8044.8	73.8	60.1	8.5	8.8	11.1	10.9	1017.3	1818.2
WYT97	0.4775	0.44725	352600	318550	3413.2	6699.6	9.2	18.5	4.5	6.9	6.9	7	122.8	284.2
WYT99	0.4975	0.6175	247900	250300	11785.1	9493.7	23.5	13.4	5.3	5.8	5.7	5.7	653.1	1527.1
