# Supplementary material for: Relationships between community composition, productivity and invasion resistance in semi-natural bacterial microcosms
Source: eLife. 2021 Oct 18;10:e71811. doi: 10.7554/eLife.71811 (PMC8523168; doi:10.7554/eLife.71811)
Supplement: Figure 3—source data 5. [file elife-71811-fig3-data5.csv]

	simp	rao	sbw25_phydist	kt2440_phydist	mgCO2.7	mgCO2.14	CPM7	CPM14	ATP7	ATP14	mG7	mG14	mN7	mN14	mX7	mX14	mP7	mP14
AE01	0.85171976799787	0.0309264629509188	-0.347308559744406	-0.341966581766269	0.2566184345	0.27906771725	5.36688968965338	5.40883332177642	3.81340416603627	3.75172164320085	1.63748972951251	1.09691001300806	1.16435285578444	0.939519252618618	0.8750612633917	0.778151250383644	2.52685598712587	2.50215389287136
AE02	0.836414499305505	0.0264515808617583	-0.419562024492569	-0.42746771626724	0.23089425275	0.1974256295	5.49002874792784	5.3773062510682	3.86799456756169	3.8204116570731	1.6730209071289	1.39445168082622	1.20139712432045	1.16136800223497	1.08278537031645	0.973127853599699	2.73925580326851	2.60379370413696
AE03	0.700442980795001	0.0322063192644334	-0.302219852068502	-0.298555454457071	0.307076173	0.179648829	5.25971330539073	5.07022263346096	3.64357110428729	3.58865259815017	1.5327543789925	1.2380461031288	0.903089986991944	1.00860017176192	0.851258348719075	0.845098040014257	2.75876054390998	2.63387226265833
AE04	0.823858112152031	0.0320678856066805	-0.322701672501352	-0.322416558630833	0.2533721475	0.20172849525	5.19159072637921	5.41170386340597	3.65469622864688	3.58843418663801	1.45939248775923	1.28780172993023	1.01283722470517	1.13672056715641	0.954242509439325	0.89209460269048	2.97927514759102	2.81524559191656
AE06	0.84972097284691	0.0398900088508282	-0.25387422694247	-0.250715937238148	0.2572903045	0.13524341425	5.15152306756494	5.11693964655076	3.80506906768547	3.68233915631472	1.84198480459011	1.31597034545692	1.45484486000851	1.33243845991561	1.05307844348342	0.903089986991944	2.9582771255477	2.94723760787067
AE07	0.832184797821407	0.0351038288608709	-0.234042223894571	-0.246001854040534	0.27522883625	0.18630383875	5.32438535649043	5.20696072915571	3.36723474901058	3.45073395375501	1.2380461031288	1.02938377768521	0.690196080028514	0.732393759822969	0.799340549453582	0.792391689498254	2.31386722036915	2.49248101012888
AE08	0.884976017413583	0.033950410150544	-0.336018863455655	-0.334799953926952	0.18468076675	0.11608323075	5.42845877351558	5.23223352111473	3.46777823874684	3.76789391041796	1.38916608436453	1.11394335230684	1.24551266781415	1.08635983067475	0.929418925714293	0.826074802700826	2.51798720302508	2.71180722904119
AE09	0.763377005774522	0.0260347991313999	-0.391286355809185	-0.39319293293664	0.25874400475	0.194394621	5.4138862523296	5.78150405720873	3.62761673258027	3.52241814897033	1.54032947479087	1.21218760440396	0.886490725172482	0.851258348719075	0.857332496431269	0.826074802700826	2.57426282970703	2.53300902249549
AE10	0.65486437373258	0.0295553093664349	-0.29936020544176	-0.298505571976225	0.23349589425	0.20300098675	5.43039759138697	5.27485032001666	3.79205533129228	3.74871506466894	1.88761730033574	1.95712819767681	0.832508912706236	0.869231719730976	1.42651126136458	1.45024910831936	2.57680189582891	2.54851225634104
AE102	0.887036266278717	0.0215281174172438	-0.553643998959308	-0.54928481143513	0.4375	0.675	5.24538927117121	5.14254588408628	3.94705121749146	3.86707839317998	1.80413943233535	1.72345567203519	0.845098040014257	0.959041392321094	0.812913356642856	0.819543935541869	2.60916737430202	3.20795734297294
AE104	0.801318658166215	0.0290782983787037	-0.351333831841735	-0.348627081282552	0.5075	0.5875	5.11427729656159	5.28712962071911	3.9981961082187	3.76522882322039	1.91855453055027	1.63346845557959	0.690196080028514	0.732393759822969	0.812913356642856	0.806179973983887	2.88519154060685	3.1103202968403
AE105	0.666539943681424	0.0193922835629842	-0.149880526150313	-0.169538220020762	0.16425	0.50375	5.12661837552295	5.02118929906994	3.97054444922124	3.53064145456356	1.97266559226611	1.52762990087134	0.690196080028514	0.662757831681574	0.806179973983887	0.732393759822969	2.95356641425701	3.02077548819356
AE106	0.743740695531553	0.0126626053026665	-0.774993553367948	-0.749488956410135	0.10375	0.4785	3.47712125471966	4.71474876072506	3.84149712124049	3.92142113673625	1.00432137378264	1.19033169817029	0.690196080028514	0.724275869600789	0.7481880270062	0.785329835010767	1.98362628712453	2.4201208480857
AE108	0.696175944585178	0.01582570777473	-0.630665434670181	-0.642243469106849	0.10775	0.4015	4.56466606425209	5.14129296008159	4.05222438856174	3.87673441298657	1.4996870826184	1.45484486000851	0.698970004336019	0.770852011642144	0.799340549453582	0.838849090737255	2.79692107533017	3.10284516424542
AE109	0.898040022599553	0.0317972678714555	-0.347538815084719	-0.34648921807962	0.5075	0.49575	5.52769433147481	5.44498111208794	1.15685190107001	3.62374534354367	0.672097857935718	1.1846914308176	0.653212513775344	0.770852011642144	0.732393759822969	0.799340549453582	1.69810054562339	2.43360984332372
AE11	0.790857896011643	0.0362151814007274	-0.137038354809593	-0.149036052909717	0.24982101375	0.23093408375	5.02325245963371	5.27829620809127	1.10380372095596	3.71280117328435	0.672097857935718	2.69888313675259	0.672097857935718	1.39967372148104	0.785329835010767	1.07918124604762	1.75891189239797	2.4072208929274
AE111	0.888174631402277	0.0294276215693179	-0.38817052063185	-0.386664547495517	0.48	0.645	5.5493098589195	5.12450422483428	1.08098704691089	3.17591750651009	0.681241237375587	1.98900461569854	0.672097857935718	0.724275869600789	0.724275869600789	0.959041392321094	1.69196510276736	2.07298474462793
AE112	0.61271647983963	0.0263620211734051	-0.292584989234469	-0.292739900415392	0.12277469025	0.1824389235	5.41888106853436	5.66940986728778	2.85315043644784	3.11885969540959	1.48995847942483	1.55630250076729	0.690196080028514	0.724275869600789	0.929418925714293	0.903089986991944	2.00432137378264	1.93145787068901
AE113	0.72507603573048	0.0253061600678782	-0.141874419440536	-0.158136555512583	0.249100605	0.26421649175	5.28981183911762	5.17304050755106	3.75929381276836	3.91693535369995	1.16435285578444	1.07188200730613	0.698970004336019	0.755874855672491	0.851258348719075	0.819543935541869	2.88172693537642	3.04277233749767
AE114	0.836783715748578	0.0219353200784013	-0.507903399723825	-0.48928971345003	0.3474697355	0.37360458075	4.58714949825434	4.90363251608424	3.56064776247832	3.58484551346021	1.51587384371168	1.22788670461367	0.886490725172482	0.897627091290441	0.869231719730976	0.8750612633917	2.64757855421246	2.77158748088126
AE115	0.731208689851438	0.0073416564928982	-1.01815848153759	-0.881863593653945	0.27663889475	0.3423753475	5.27955288115039	4.52955867302116	3.28725291863327	3.598429356191	1.11058971029925	1.0899051114394	0.698970004336019	0.690196080028514	0.812913356642856	0.812913356642856	2.34849957028384	2.51956550088051
AE117	0.254855534183218	0.00931108831505771	-0.504964975672558	-0.48045071920949	0.25048902575	0.30633718125	4.52244423350632	4.72672720902657	2.45385323258819	3.6724257650525	0.716003343634799	1.39794000867204	0.716003343634799	0.716003343634799	0.785329835010767	0.863322860120456	1.78175537465247	2.31701810104811
AE118	0.360762084054457	0.0154729829017787	-0.447925869798073	-0.431953154836517	0.350310141	0.26881984775	4.95975667299099	5.13624480174614	3.46859838049625	3.90560971426575	1.24797326636181	1.08278537031645	0.90848501887865	0.869231719730976	0.863322860120456	0.832508912706236	1.9576072870601	2.18864729599972
AE119	0.17586983371358	0.00705916439233753	-0.515467434552706	-0.489798893737566	0.30967933675	0.32382084025	5.35063560825895	5.3674491072686	3.27853639940696	3.54893578165216	1.15533603746506	1.26245108973043	0.799340549453582	0.799340549453582	0.949390006644913	0.886490725172482	2.42422807069598	2.26951294421792
AE120	0.447040300191568	0.00866674892306406	-0.550521791502058	-0.522794905629224	0.26455848825	0.36389080775	5.29512708525219	5.46194849520376	3.21430064036975	3.59686638464816	1.34439227368511	1.41329976408125	0.690196080028514	0.698970004336019	1.04921802267018	0.986771734266245	2.27692113206577	2.89856064493971
AE122	0.288932022948224	0.0119802995116343	-0.118105342418856	-0.134694670342054	0.2477384545	0.29360729225	4.78318869107526	5.12936759572299	3.42280315964738	3.65454231220283	1.38021124171161	1.35024801833416	0.716003343634799	0.716003343634799	0.929418925714293	0.8750612633917	2.17026171539496	2.37069809257558
AE123	0.413331243188558	0.01620200066799	-0.457363838760048	-0.44102937870754	0.24794134275	0.4245022965	5.09447112864164	4.89680169766492	3.02879484864894	3.81111567088592	0.903089986991944	1.50785587169583	0.690196080028514	0.740362689494244	0.8750612633917	0.924279286061882	2.00302947055362	2.38614210893082
AE124	0.615739842673504	0.0207645681505799	-0.427895413094224	-0.416397105718627	0.25688107875	0.31218029475	4.96731391828708	4.81921479988238	3.45838097285678	3.71251080618342	0.812913356642856	1.05690485133647	0.724275869600789	0.826074802700826	0.792391689498254	0.806179973983887	1.90633504180509	2.03261876085072
AE125	0.721140591266867	0.0233299715779176	-0.131942790246641	-0.148630099663912	0.22720943575	0.27488046425	5.48508228805585	5.86287643779377	2.15014216184856	3.62919545748789	0.698970004336019	1.80208925788173	0.672097857935718	0.724275869600789	0.806179973983887	1.13353890837022	2.06483221973857	2.01241537476243
AE127	0.582996120848367	0.0152727445825274	-0.481160043817975	-0.461200904693317	0.342188609	0.3209941785	4.9216864754836	5.11176643305256	3.43622627527058	3.61238115323532	1.47856649559384	1.48287358360875	0.799340549453582	0.819543935541869	0.832508912706236	0.826074802700826	2.45331834004704	2.71775369321072
AE128	0.30184669272086	0.0119034967734864	-0.484677594059809	-0.464174643556752	0.224224116	0.3192477365	4.93851972517649	5.17551181336345	3.3810157504471	3.70960912107265	1.42324587393681	1.54900326202579	0.792391689498254	0.939519252618618	0.826074802700826	0.845098040014257	2.41730558324453	2.78247262416629
AE129	0.771801159976292	0.180474856259344	0.382732260477708	0.383595402747962	0.237296931	0.3990732345	4.93651374247889	4.89070039769888	2.57639894512424	3.59321958828748	0.732393759822969	1.57287160220048	0.690196080028514	0.724275869600789	0.792391689498254	0.826074802700826	1.81224469680037	2.35907622605926
AE13	0.910123338356996	0.0431553206975814	-0.206049869121503	-0.21442290212822	0.22741701225	0.1643814765	5.32572085801941	5.31333984388431	3.57765836233687	3.60419364183912	1.10037054511756	1.05307844348342	0.7481880270062	0.740362689494244	0.819543935541869	0.826074802700826	2.39287274540208	2.48869169831694
AE130	0.282581110054018	0.0114828333905807	-0.482657512249211	-0.461624264675215	0.276735702	0.3615109765	5.00194994108427	5.12106716746773	3.44437273624829	3.82446102935352	1.82412583391655	1.79448804665917	0.716003343634799	0.838849090737255	0.986771734266245	1.02530586526477	1.97405090279288	2.68457608738846
AE131	0.587935944537633	0.023150650696771	-0.401009928727487	-0.394483553400033	0.25633660075	0.35001050675	4.73279569828933	4.50514997831991	3.50295259873057	3.56213815667771	1.72345567203519	1.39093510710338	0.799340549453582	0.806179973983887	1.00860017176192	0.949390006644913	2.52762990087134	2.50487845941022
AE133	0.300934176356796	0.00802204354675845	-0.542599320904864	-0.515030278836459	0.249911602	0.353513139	4.59439255037543	4.85853719756964	3.47084398096586	3.79079517806157	1.9329808219232	1.96425963019685	0.716003343634799	0.778151250383644	0.982271233039568	0.973127853599699	2.17782497186468	2.66398345460827
AE134	0.468304707860814	0.0171599552654425	-0.45284358939501	-0.440858122524645	0.31237950675	0.40330115425	4.18892848376085	4.76826801645155	3.63655308578228	3.76790502712349	1.81023251799508	1.60314437262018	0.7481880270062	0.806179973983887	1.00432137378264	1	2.62117628177504	2.61857102812013
AE135	0.416063500202029	0.0130136056412968	-0.501212530621381	-0.480082090349456	0.343721207	0.281092165	5.21178776290089	5.23904909314019	3.49745490961318	3.8448963564675	1.25767857486918	1.65417654187796	0.716003343634799	0.724275869600789	0.90848501887865	0.973127853599699	2.35602585719312	2.56407397897715
AE136	0.70299580604665	0.0376403345374576	-0.199391484201121	-0.205448798742251	0.27872484125	0.4475803285	4.66745295288995	4.8701111553644	3.05480450022095	3.52939826877856	0.90848501887865	1.31175386105575	1.10037054511756	1.36172783601759	0.838849090737255	0.869231719730976	1.82801506422398	1.91169015875386
AE137	0.3989336635949	0.0168677115455598	-0.435666686063744	-0.4225275199687	0.236249954	0.34046352775	4.83790394459294	5.20139712432045	3.25517598449353	3.60918339569176	1.17318626841227	1.27646180417324	0.681241237375587	0.826074802700826	0.792391689498254	0.863322860120456	1.85672889038288	2.35812528527665
AE139	0.732548110430073	0.189071118005786	0.404806947270394	0.405477437883461	0.23110633975	0.3288059825	5.67255962776328	5.08618180464975	3.6184978556175	3.81270952448314	0.934498451243568	1.47856649559384	0.681241237375587	0.763427993562937	0.799340549453582	0.880813592280791	1.79518458968242	2.55497345833324
AE14	0.820395180325073	0.0304543493913428	-0.346910993673735	-0.361653461894874	0.23669362025	0.1437074495	5.06126394230025	5.16568937601762	3.56228096581452	3.55319707632473	1.31597034545692	1.17897694729317	0.732393759822969	0.785329835010767	0.959041392321094	0.944482672150169	2.69696764074402	2.72361983551546
AE143	0.736802395222092	0.027851649643651	-0.184293316791696	-0.199512777123078	0.233973209	0.26003784425	5.24266563664526	5.54007908880417	3.67805834782051	3.80728127726882	1.60852603357719	1.55750720190566	0.838849090737255	0.886490725172482	0.986771734266245	1.08278537031645	2.42651126136458	2.61023417533439
AE144	0.737232151298041	0.12762707694652	0.203630574067828	0.204410965932882	0.228236097	0.32324848675	5.37566361396089	5.53013563824546	3.18459207104159	3.72637262134751	1.26951294421792	1.35602585719312	0.863322860120456	0.977723605288848	1	1.11058971029925	2.49262072204319	2.68439647841902
AE145	0.667378935094922	0.0124330565617124	-0.700038759590966	-0.642376144596587	0.29070239975	0.40163865825	4.83346586017069	5.02999217537785	3.64731938631316	3.80771087496409	1.79028516403324	1.68841982200271	0.698970004336019	0.724275869600789	0.959041392321094	0.986771734266245	2.36361197989214	2.89109122646772
AE146	0.196241435193743	0.0073346645440433	-0.5164113491738	-0.490867862467114	0.2510866395	0.35774517625	5.56401472602912	5.69521891890515	3.60040107930144	3.86263815811869	1.20139712432045	1.58206336291171	0.740362689494244	0.799340549453582	0.924279286061882	1.04921802267018	2.48685535527694	2.63548374681491
AE147	0.27037100611841	0.0128603383174715	-0.461636722973005	-0.443062657677811	0.22655830425	0.327504292	5.31722734917642	5.0918427497381	3.41095428823489	3.71176927932164	1.0899051114394	1.53907609879278	0.724275869600789	0.755874855672491	0.934498451243568	1.02530586526477	2.14643813528577	2.41346741298582
AE149	0.648974438909895	0.0184919649148045	-0.0372538064957587	-0.0523447507754547	0.16989394275	0.2437837015	5.1692334513011	5.25731851309764	3.25500702179176	3.39918031809204	1.32221929473392	1.15228834438306	0.690196080028514	0.707570176097936	0.792391689498254	0.770852011642144	2.42520805113866	2.49596039488171
AE15	0.736423340326429	0.030693455677142	-0.24880458437218	-0.251532345615955	0.21447753225	0.13850238025	5.71256552787331	5.70178378356069	3.66300323312964	3.64554016135051	1.68752896121463	1.48000694295715	1.10037054511756	1.1430148002541	0.973127853599699	0.949390006644913	2.81796180453199	2.79996052740598
AE150	0.436847906062234	0.0158835706164728	-0.179017545110524	-0.198039342558799	0.19143392925	0.346109908	4.94497590841205	5.41655730119148	3.50706614083186	3.43179784163831	1.13672056715641	1.07918124604762	0.690196080028514	0.724275869600789	0.806179973983887	0.770852011642144	1.95999483832842	2.06557971472845
AE151	0.617299046054428	0.0249128369164851	-0.216085861920764	-0.231133808969974	0.2510556225	0.31813071425	6.05547389623002	5.57350980140703	3.54945694858202	3.69810054562339	1.60852603357719	1.40483371661994	1.00860017176192	1.02118929906994	0.886490725172482	0.838849090737255	2.28914283593233	2.23248786635299
AE152	0.508082608560557	0.0235944189638383	-0.0762068351988006	-0.09264399551389	0.185627234	0.34733369075	5.56661423823912	5.77833216872907	3.74581620828184	3.74802125693024	1.57749179983723	1.29885307640971	0.732393759822969	0.716003343634799	0.755874855672491	0.799340549453582	2.78454597405452	2.72875947516787
AE153	0.559375138363061	0.0241604207935009	-0.111785460693052	-0.123860450368545	0.2465296165	0.2856875785	4.88705437805096	4.86242955610601	3.65627552668775	3.73534335718895	1.28555730900777	1.25527250510331	0.755874855672491	0.690196080028514	0.832508912706236	0.763427993562937	2.34478512263266	2.81537848496592
AE154	0.316163883672322	0.0157672368920204	-0.435899699623643	-0.420112608492559	0.34856271675	0.52068993175	5.23477029516092	4.95616843047536	3.84230025649141	3.7691039595176	1.28555730900777	1.28103336724773	0.845098040014257	0.963787827345555	0.778151250383644	0.763427993562937	1.98766626492627	2.12872228433843
AE156	0.779039129388237	0.0234926259968379	-0.47203762590262	-0.489753573658087	0.19777938975	0.23401017775	4.75549372841512	5.15941678821674	3.5344639893137	3.61255075811203	1.18752072083646	1.37657695705651	0.763427993562937	0.724275869600789	0.785329835010767	0.869231719730976	1.97589113640179	2.27989498001164
AE157	0.426335729259371	0.0179834149855712	-0.152401979001536	-0.168373151236109	0.2255247105	0.29972827625	5.356503891894	5.15381486434453	3.31589690781411	3.60156026527619	1.17609125905568	1.20411998265592	0.991226075692495	1.08278537031645	0.755874855672491	0.785329835010767	2.02694162795903	2.40243334621931
AE158	0.638746574082	0.0146713739183164	-0.48022695751478	-0.461083825857328	0.2798078815	0.4297909575	5.68654689906301	5.54623410610678	3.1137094384495	3.63455787418507	1.06445798922692	1.59659709562646	1.10720996964787	1.13353890837022	1.16435285578444	1.12710479836481	1.78746047451842	2.3701428470511
AE159	0.805470806183992	0.0282425783164281	-0.354110699361209	-0.349316048311215	0.2008203575	0.275579201	4.731185707634	5.1070402902232	3.35742024614542	3.63952633097146	1.34439227368511	1.60097289568675	0.763427993562937	0.755874855672491	0.863322860120456	0.880813592280791	2.56038492297202	2.58387859849863
AE16	0.860927029227881	0.0341522979523308	-0.326159882521121	-0.320213515994274	0.26361448275	0.141870688	5.30016053695135	5.43584436598444	1.25887662937213	3.5993535211543	0.724275869600789	1.86153441085904	0.662757831681574	0.799340549453582	0.785329835010767	1.08635983067475	1.74507479158206	2.61647551388857
AE160	0.646077808094747	0.0343866361764644	-0.225751105335127	-0.221352990463901	0.175727084	0.42999602525	5.31323429169472	5.69394667798571	3.58219408633893	3.72252698080248	1.41161970596323	1.77524625974024	0.792391689498254	0.8750612633917	0.851258348719075	1.09342168516224	2.38721180031373	2.70688839498162
AE161	0.329825569784677	0.0153575003878015	-0.106175380500211	-0.120377300880571	0.41706725625	0.46478318025	5.42732378635725	5.91645394854993	3.67318223922794	3.57325463425403	1.67760695272049	1.43136376415899	1.01283722470517	1.04921802267018	0.977723605288848	0.986771734266245	2.53794495929149	2.72501272534116
AE162	0.62153912241705	0.019684938306716	-0.407585501902691	-0.395132962460301	0.385218412	0.53741540275	5.09950799372796	5.35822047310868	3.6051164157672	3.8204543410296	1.63648789635337	1.20411998265592	0.832508912706236	0.880813592280791	0.8750612633917	0.863322860120456	2.31323429169472	2.7435881501599
AE163	0.614649470776912	0.0268903735759929	-0.109438988085862	-0.124909353038221	0.34740096325	0.5254971175	5.05709528961267	5.52041802335355	3.71941830292345	3.75698203696902	1.67486114073781	1.52891670027765	0.792391689498254	0.819543935541869	0.838849090737255	0.812913356642856	2.81934648408045	2.84763434431826
AE164	0.347207500487919	0.0134717381756164	-0.455492975055901	-0.43693126022393	0.323620363	0.52486120125	5.64008373137312	5.34995709871946	3.57363153289814	3.69787420094872	1.44870631990508	1.91645394854993	0.845098040014257	1.03342375548695	0.939519252618618	1.18184358794477	2.17522180034305	2.56714404519566
AE165	0.786975275180942	0.0263990990019422	-0.410938420629519	-0.402755304269295	0.26093393425	0.39198755625	4.49485002168009	4.72468538823736	3.43164516013989	3.71877148211728	1.07554696139253	1.29885307640971	0.740362689494244	0.690196080028514	0.785329835010767	0.857332496431269	1.8998205024271	2.4201208480857
AE166	0.36544928732847	0.01466031292168	-0.465148995905908	-0.450134614846409	0.381754766	0.492919396	4.86893817833291	5.18525876529659	3.77982728413261	3.65684056545565	1.51587384371168	1.25042000230889	0.755874855672491	0.707570176097936	0.826074802700826	0.792391689498254	2.29203443599474	2.33142729652074
AE167	0.439302197133586	0.0185399592898695	-0.421383662246631	-0.41062149172028	0.3053360565	0.40817902275	5.26881190373978	5.48749189155849	3.46116074425403	3.30287183606769	1.40312052117582	1.06818586174616	0.880813592280791	0.845098040014257	0.770852011642144	0.763427993562937	1.90579588036787	1.9698816437465
AE168	0.517785896525374	0.0220505733998141	-0.405008365241512	-0.398091767221264	0.25883532175	0.47343226875	4.89348434621849	5.23451728351269	3.85490089100764	3.68731042133487	1.26245108973043	1.18184358794477	0.755874855672491	0.944482672150169	0.845098040014257	0.799340549453582	2.36248247475117	2.61129836229643
AE169	0.599620890411217	0.0310291389638396	-0.297355002632012	-0.297025982970409	0.416992997	0.54422095025	4.67715052127343	5.07773117965239	3.37376686840687	3.60344210341623	1.06445798922692	1.42160392686983	0.755874855672491	0.886490725172482	0.851258348719075	0.832508912706236	2.03502928220237	2.43360984332372
AE17	0.76738957934573	0.0344151912037419	-0.273796137869868	-0.272585952832894	0.20058099425	0.1734930525	5.19824458622824	5.34586362850376	3.28542227418825	3.55757937781618	0.90848501887865	0.986771734266245	0.690196080028514	0.7481880270062	0.799340549453582	0.851258348719075	2.87040390527903	3.06785166051235
AE170	0.677371799284914	0.0228340683464285	-0.117478009979791	-0.134997165084515	0.33482470825	0.4521535095	5.29918031074535	6.03076159095102	3.27329070525133	3.67500343379825	1.2718416065365	1.52113808370404	0.707570176097936	0.724275869600789	0.7481880270062	0.799340549453582	2.055378331375	2.41329976408125
AE171	0.651790768943879	0.0294440652135085	-0.303710779863523	-0.301238680749393	0.37764354725	0.4575359085	5.28936595152003	5.4761792624817	3.54769472878543	3.7836606492961	1.79448804665917	1.78175537465247	0.690196080028514	0.799340549453582	0.785329835010767	0.963787827345555	2.29114676173189	2.7337588355872
AE173	0.764897730723333	0.0214304702202881	-0.467593855120343	-0.474822445162802	0.287073245	0.5320462845	5.20371264060771	5.3910233693701	3.72978823518154	3.62434914325215	1.69460519893357	1.19865708695442	0.819543935541869	0.732393759822969	0.832508912706236	0.778151250383644	2.16494737262184	2.31722734917642
AE174	0.361547716647381	0.00999506274930235	-0.545040487360103	-0.519348738075422	0.35847515725	0.47023358625	4.65801139665711	4.96213246929824	3.66292773975986	3.6575099983156	1.57170883180869	1.22530928172586	0.785329835010767	0.886490725172482	0.838849090737255	0.763427993562937	2.48770386316373	2.9899834583014
AE175	0.483362011152818	0.0299887706226125	-0.308541835336558	-0.299670182864461	0.34694936775	0.50419805275	5.91251432287369	5.40440605092127	3.58119846087477	3.64984091606916	1.59988307207369	1.39093510710338	0.806179973983887	0.851258348719075	0.851258348719075	0.812913356642856	2.3541084391474	2.72238709417712
AE176	0.142774006396343	0.00585378346153173	-0.523432993792991	-0.496250579748098	0.1957825515	0.3626852545	4.610127613076	5.13161866434913	3.53785056454772	3.6590505502229	1.14612803567824	1.02118929906994	0.7481880270062	0.707570176097936	0.857332496431269	0.838849090737255	2.20002926655377	2.53045584358468
AE177	0.515005979022148	0.0232964091783022	-0.371779560793945	-0.365694776098036	0.3125147675	0.4435235645	5.20547503674089	5.74834310448755	3.74057978246647	3.89379781310479	1.52762990087134	1.66838591669	0.732393759822969	0.857332496431269	0.851258348719075	0.832508912706236	2.19284611518884	2.74256803436614
AE178	0.847113925304144	0.0312969029433359	-0.357076543573361	-0.350869942140818	0.33645109675	0.45805355525	5.09950799372796	5.37984917876283	3.53521181154005	3.43572495042568	1.10380372095596	1.04532297878666	0.740362689494244	0.755874855672491	0.799340549453582	0.732393759822969	2.16879202031418	2.25911584418507
AE18	0.698800540939635	0.0271978901162245	-0.072362630846308	-0.0887761581417214	0.2452285755	0.2118782775	5.40140054078154	5.37355560663893	3.24057420701838	3.60466876452018	1.04921802267018	1.04139268515823	0.690196080028514	0.7481880270062	0.799340549453582	0.819543935541869	2.89542254603941	3.11273902236017
AE19	0.740665958575046	0.0233366125800983	-0.477748658704275	-0.484357057681674	0.230641615	0.211652956	5.33605927786635	5.25029799233986	2.55696549989694	4.31434131227591	1.34830486304816	1.87040390527903	0.707570176097936	0.929418925714293	0.763427993562937	1.00860017176192	1.74429298312268	2.37511468469223
AE20	0.666214455578891	0.0325813437680761	-0.120621161371417	-0.133357547213174	0.22901799675	0.2285480345	4.81056852921641	4.81324730089761	2.91230178504261	3.06256318319429	1.96331551138611	1.75587485567249	0.672097857935718	0.681241237375587	0.826074802700826	0.832508912706236	1.83884909073726	1.78247262416629
AE21	0.778401523544392	0.0408700421452528	-0.198505999962269	-0.204077114778602	0.2804612535	0.15690214375	5.63858908329272	5.48614699680657	3.2196892890858	3.49242511277609	1.13987908640124	1.29666519026153	0.785329835010767	0.812913356642856	0.8750612633917	0.903089986991944	2.29336255471145	2.62211036036122
AE24	0.835646199544912	0.036475943911819	-0.24135140546738	-0.243915569834981	0.26844863375	0.1500472865	5.45712462630341	5.53364497879876	4.11739559880461	3.49037289934375	1.06818586174616	1.74350976472843	0.707570176097936	0.944482672150169	0.826074802700826	1.01283722470517	1.75281643118827	1.91855453055027
AE25	0.837591917009266	0.0320516329778123	-0.335371845890528	-0.330678558376907	0.16170170125	0.18500424025	5.43854234878611	5.3583156400822	3.66953072026909	3.66239891840758	1.66931688056611	1.58771096501891	1.05307844348342	1.36735592102602	0.863322860120456	0.924279286061882	2.53058385964512	2.66567478099389
AE28	0.777768402956376	0.0260083206470724	-0.359551389352898	-0.369653988400509	0.211968455	0.1986212265	5.10602081914027	5.0883133155881	2.90325281689396	3.38448782208676	0.924279286061882	1.69722934275972	0.770852011642144	0.838849090737255	0.799340549453582	0.934498451243568	1.75966784468963	2.01870049866624
AE29	0.778228441686901	0.0373660791473297	-0.231625572295083	-0.240075105244643	0.25937491525	0.2054150395	5.27311706848674	5.2436580266387	3.68665414109546	3.68991680094082	2.0386201619497	2.09096307659573	0.785329835010767	0.857332496431269	1.69284691927723	1.66181268553726	2.74264658993874	2.58467038446435
AE30	0.818997946873696	0.0279082426331572	-0.370401759909194	-0.362449047735273	0.27201065525	0.2365355135	5.26540749653109	5.32990612340021	3.61672751011356	3.57667529446054	1.96848294855394	1.93399316383124	0.903089986991944	0.7481880270062	1.41497334797082	1.41161970596323	2.84422858130163	2.88598281135497
AE31	0.645769538276652	0.0289765345278786	-0.296341085972403	-0.295700408784779	0.17353609525	0.1261852445	5.30813737863804	5.25707830596657	3.5668085758435	3.49875151789085	1.21218760440396	1.01283722470517	0.763427993562937	0.778151250383644	0.799340549453582	0.799340549453582	2.69478063601206	2.63858908329272
AE32	0.791325550568215	0.0285315763473242	-0.313507664490054	-0.323781090721922	0.23343518725	0.164243094	5.17666993266815	5.32827764440977	3.56838362014465	3.7107898736108	1.8488047010518	1.6170003411209	0.897627091290441	0.968482948553935	0.90848501887865	0.90848501887865	2.86266795022859	2.95808584852109
AE33	0.761746978257541	0.0272778891964397	-0.369463698336527	-0.377763221563201	0.139957525	0.21994318075	5.51087998475612	5.54918724613441	3.497275286358	3.55800617335508	1.16136800223497	1.06069784035361	0.8750612633917	0.869231719730976	0.838849090737255	0.806179973983887	1.89486965674525	1.93348728784871
AE34	0.787477786574763	0.162868412827331	0.328436576046237	0.325731041103596	0.238535973	0.26840179125	5.06295783408451	4.98407703390283	2.91444894069855	3.3887936723235	0.785329835010767	1.84509804001426	0.690196080028514	0.785329835010767	0.785329835010767	1.12057393120585	1.76789761601809	2.49762064978129
AE35	0.816109397917399	0.13765971639835	0.238513980916812	0.236564552189449	0.205080011	0.26747280975	5.60227708430019	5.50589578121975	2.87040390527903	3.39981211997867	2.81835787795835	2.57749179983723	0.707570176097936	0.8750612633917	0.792391689498254	1.27415784926368	1.78390357927273	2.0386201619497
AE36	0.657511982695328	0.0340182750748088	-0.0856595730793786	-0.0994818880074554	0.299444783	0.29700296825	5.05269394192497	5.23615923057966	2.12596896309256	3.35347382890307	0.707570176097936	1.97726621242729	0.681241237375587	0.838849090737255	0.778151250383644	1.07188200730613	1.75358305889291	1.91960102378411
AE37	0.830738335590128	0.0384056470442194	-0.233889124872274	-0.233925640619729	0.24959283725	0.22590845375	5.20398424442013	5.17274883898274	3.80851817993497	3.87270971828791	1.67209785793572	1.44090908206522	0.7481880270062	0.724275869600789	0.89209460269048	0.886490725172482	2.5613399414589	2.76522136630498
AE38	0.767597464254071	0.0289470119801513	-0.304144311943358	-0.302260473419574	0.17768794625	0.1682728155	5.3600250891894	5.15044940946088	3.15730563032797	3.62164357219457	1.28555730900777	1.67024585307412	0.698970004336019	0.755874855672491	0.838849090737255	1.05690485133647	1.77305469336426	2.09725730969342
AE39	0.784538390148303	0.0358830649085414	-0.235256902269591	-0.236543414026006	0.21323707275	0.19656878525	5.13497354000592	5.14301480025409	2.99447113050564	3.23018059779569	0.897627091290441	1.04532297878666	0.690196080028514	0.716003343634799	0.812913356642856	0.845098040014257	2.50542132758328	2.7822575736633
AE40	0.762193479436674	0.0752976189568406	-0.00174431036951139	-0.00238474164837237	0.223650579	0.19168543	5.2692793897719	5.19672872262329	3.5515353845608	3.56250698428536	1.44404479591808	1.74663419893758	1.14612803567824	1.43296929087441	1.00432137378264	1.18184358794477	2.23223352111473	2.3533390953113
AE41	0.634712889771359	0.0364637352712007	-0.174919491752658	-0.180221132674344	0.25934043225	0.284044617	5.67315919545419	5.2678754193189	3.5865254189246	3.61083044126571	1.50242711998443	1.36172783601759	0.880813592280791	0.944482672150169	0.919078092376074	0.944482672150169	2.96142109406645	2.98944981766669
AE42	0.607784541987308	0.0504947800360649	-0.114245932166575	-0.116074565024609	0.27632937325	0.2779853165	5.45017209892437	4.76863810124761	3.63203696714625	3.71520919537866	1.6954816764902	1.77232170672292	0.897627091290441	1.07918124604762	1.14921911265538	1.34439227368511	2.884851982746	3.06348347802753
AE43	0.844939283463902	0.0382444940812552	-0.232569411225996	-0.234958706987646	0.3409260065	0.335924576	5.4500950758716	5.44862903643092	3.15854341044067	3.59437044831268	0.785329835010767	1.61384182187607	0.716003343634799	0.812913356642856	0.785329835010767	1.02118929906994	1.77524625974024	2.09760432887441
AE44	0.893845564707588	0.0284408820808	-0.412972108770479	-0.406823540922834	0.2986097785	0.23629199075	5.3040594662176	5.36632955051911	3.67107097065497	3.79780055770718	1.72263392253381	1.43933269383026	0.724275869600789	0.778151250383644	0.880813592280791	0.986771734266245	2.84608958035798	2.9635517335741
AE45	0.890542530232325	0.0374155316219739	-0.264401418837584	-0.264975040645651	0.314290851	0.2402895485	5.44451320633404	5.28589471248084	3.15813623812717	3.68213153267569	1.19865708695442	1.03342375548695	0.724275869600789	0.857332496431269	0.806179973983887	0.838849090737255	2.2523675144599	2.35005409357903
AE46	0.704638450744054	0.0288970501482049	-0.29914436481509	-0.303756413354384	0.241531767	0.17517939575	5.19906919625174	5.16450156130957	3.4254608537472	3.57006401801467	1.90525604874845	1.81822589361396	1.01283722470517	1.06818586174616	1.49554433754645	1.47421626407626	2.22297644989339	2.38614210893082
AE47	0.891778592651903	0.0278641041176383	-0.410612324759483	-0.418070054716611	0.22673027325	0.168784106	5.40671045860979	5.21404867941194	2.76741562269037	3.61317031273957	1.74741180788642	2.23299611039215	0.845098040014257	1.50650503240487	0.799340549453582	1.03742649794062	1.75966784468963	2.26434550705009
AE48	0.834385616213948	0.0378453531296418	-0.280568508718296	-0.274409531418317	0.27649943525	0.17883682525	5.38129562300383	5.18184358794477	2.57553421831986	3.24566069752026	1.55144999797288	1.70243053644553	0.763427993562937	0.944482672150169	0.792391689498254	0.982271233039568	1.75204844781944	2.19340290306242
AE49	0.777517339613963	0.0310366393943401	-0.349987619707042	-0.341152280969391	0.1530301155	0.3380524315	5.07003786660776	5.00796103333618	2.03282014943856	3.4642883005559	1.50514997831991	1.96848294855394	0.778151250383644	1.3747483460101	0.799340549453582	1.04139268515823	1.74429298312268	2.12710479836481
AE51	0.849802650035244	0.0274292776814048	-0.395197998687204	-0.389936500725542	0.385801197	0.4381568665	5.51507867507592	5.61081980083544	3.62586782797682	3.74203347931242	1.32221929473392	1.31386722036915	0.863322860120456	0.903089986991944	1.09691001300806	1.17026171539496	2.92106189079028	3.06250677520868
AE53	0.770127417715008	0.0391602343527537	-0.189467684818137	-0.195113991962369	0.233907654	0.21580910725	5.33010925459283	5.17347764345299	3.53738458329926	3.53007156883738	1.48287358360875	1.2718416065365	0.934498451243568	0.949390006644913	0.863322860120456	0.863322860120456	2.66266340957404	2.81318053258601
AE54	0.817215471564583	0.0288045345624683	-0.352293071286065	-0.347096687649273	0.28117371925	0.1838433595	5.4379882502195	5.38336648275504	3.659402725922	3.58599621711041	1.76267856372744	1.41329976408125	1.3654879848909	1.33645973384853	0.939519252618618	0.838849090737255	2.79126948091027	2.86183299765794
AE55	0.745910768872367	0.0312251258142195	-0.299918716090325	-0.297661757563846	0.190882506	0.173845397	5.1893499243392	4.86805636182304	3.73184249951426	3.65157842634378	1.48287358360875	1.1430148002541	1.01703333929878	0.973127853599699	1.14921911265538	1.05690485133647	2.94640313389905	3.0212306584797
AE56	0.806828409647246	0.0314644798720696	-0.300540577351234	-0.310680479133152	0.17739386625	0.15343366375	5.26316246496222	5.32170196950074	3.58062850556855	3.58478337899651	1.85064623518307	1.55990662503611	1.68930885912362	1.43775056282039	0.845098040014257	0.792391689498254	2.82216807936802	2.74811046749498
AE57	0.819522174054226	0.042514279806083	-0.12207578303265	-0.133253999644412	0.15213414125	0.346689418	5.19465307195293	5.25611614665438	3.45801806529185	3.63688389663554	1.20411998265592	1.10037054511756	0.851258348719075	0.90848501887865	0.832508912706236	0.799340549453582	2.56949095434878	2.88918961204707
AE58	0.685386509007168	0.030817359159774	-0.260274476623806	-0.260803162257658	0.1583574475	0.13496075625	4.85033985458348	4.95012134751137	3.32772665164214	3.32851211440088	1.37291200297011	1.11058971029925	0.732393759822969	0.724275869600789	0.819543935541869	0.792391689498254	2.16316137497702	2.10957854690439
AE59	0.72016800276143	0.0388765341504313	-0.211347580588516	-0.214916506192046	0.1779774245	0.17151376925	5.20085049809108	5.37903343181797	2.48273070007994	3.34085045605158	1.2380461031288	2.28533222764388	0.755874855672491	1.26245108973043	0.799340549453582	1.13033376849501	1.75204844781944	2.43727479741012
AE60	0.777393200811391	0.0702583786863682	-0.0356808579062352	-0.0336465289887693	0.249886238	0.21467713075	5.51128161346714	5.54057971650445	2.20316892287546	3.49653528459346	1.52374646681156	2.03342375548695	0.897627091290441	1.29225607135648	0.792391689498254	0.968482948553935	1.75815462196739	2.32756326018728
AE61	0.836080234291351	0.0270697345425249	-0.418249272918619	-0.409934017521709	0.28154252775	0.313950152	5.51201696949613	5.1846914308176	3.79481556102561	3.74816088275281	1.57634135020579	1.25285303097989	1.21748394421391	1.09342168516224	0.845098040014257	0.819543935541869	2.68069802969764	2.72222246396973
AE62	0.837507331896557	0.0237761628348384	-0.510596847867601	-0.50565228137315	0.20739662325	0.17238164975	6.10770166541864	5.53844805171022	3.65110833457348	3.61585014191869	1.60745502321467	1.44247976906445	1.24551266781415	1.41329976408125	0.913813852383717	0.851258348719075	2.38147609027503	2.40925665203891
AE63	0.755414856095214	0.0648645182108378	-0.037124189715921	-0.0413047843613511	0.151942141	0.127531094	5.26375438884001	5.19686674724924	2.5668497877944	3.4860193694906	1.81291335664286	2.3914644118391	0.99563519459755	1.69635638873333	0.812913356642856	1.19589965240923	1.71683772329952	2.35545152012652
AE64	0.817877654948846	0.0382696079502534	-0.186953926542852	-0.200382684778283	0.244060847	0.18245254525	5.34439227368511	5.32970289715321	3.51327088446552	3.61335547797911	1.33645973384853	1.17609125905568	0.799340549453582	0.8750612633917	0.806179973983887	0.832508912706236	2.83052451409726	2.95065688250451
AE65	0.857190659458627	0.0351952206949217	-0.27709210343504	-0.278315029116114	0.81538347475	0.22840094475	5.37106786227174	5.41027096425218	3.57293546434042	3.5217328689646	1.65224634100332	1.33041377334919	0.8750612633917	0.799340549453582	0.90848501887865	0.869231719730976	2.53224464362658	2.4184670209466
AE66	0.590278507295453	0.0297153152707346	-0.412016588836243	-0.391703724904448	0.29496020475	0.2689799315	4.91907809237607	5.04746957461986	3.58571446383602	3.59693230753466	1.77670118398841	1.62013605497376	1.18752072083646	1.35793484700045	1.11727129565576	0.944482672150169	2.26997967664532	2.24278980947868
AE67	0.654177942083138	0.0258898797818114	-0.427305306737633	-0.413746422879634	0.27154630675	0.2018190685	5.03181227133037	5.1300119496719	3.69470608391288	3.73032998649759	1.55144999797288	1.29666519026153	0.707570176097936	0.770852011642144	0.806179973983887	0.838849090737255	2.62541535215441	2.76789761601809
AE68	0.126938349123488	0.0055300824135525	-0.0723255529126479	-0.0879421106105673	0.205322473	0.239269522	4.89872518158949	5.32735893438633	3.76699251094336	3.73218460471623	1.71683772329952	1.27415784926368	0.90848501887865	0.869231719730976	0.880813592280791	0.863322860120456	2.51732788229437	2.47377883464672
AE69	0.819916919781392	0.028921706392626	-0.356432086562993	-0.364715364348395	0.2642276915	0.22771140975	5.13401764567598	5.42086302055098	3.90011303303751	3.87600410588091	1.33645973384853	1.08635983067475	0.934498451243568	1.01283722470517	0.799340549453582	0.778151250383644	2.82105475504689	2.81204389793023
AE70	0.859382716017865	0.0359796408013288	-0.280596086618233	-0.284826296816409	0.29193694925	0.19276941725	5.73339790936142	5.28397928423848	3.4565558056826	3.50148375907294	1.17897694729317	0.959041392321094	0.857332496431269	0.90848501887865	0.8750612633917	0.832508912706236	2.58613702523079	2.72049006845005
AE71	0.824055677646463	0.0622812708222777	-0.123586183215206	-0.12577595502385	0.1881989785	0.144215	5.43536650661266	5.43528681224013	2.85406301186642	3.3888025429891	1.69460519893357	1.97909290063833	0.732393759822969	1.20139712432045	0.806179973983887	1.03742649794062	1.86391737695786	2.54777470538782
AE72	0.810553765065563	0.0312980605044038	-0.324161627416706	-0.329500856016305	0.251098825	0.177157906	5.38987455839099	5.30803055426611	2.4714384073893	3.53080779699112	1.2148438480477	2.07040732174012	0.690196080028514	0.792391689498254	0.792391689498254	1.0899051114394	1.77597433112937	2.29468662427944
AE73	0.898522659047636	0.0338090929233903	-0.321418715985962	-0.325870748367008	0.19338984575	0.22679087425	5.37438169805088	5.48706763771632	3.60391264301064	3.66339464451522	1.46089784275655	1.2718416065365	0.919078092376074	0.897627091290441	0.799340549453582	0.806179973983887	2.5278875659527	2.35295391171009
AE74	0.911898978747961	0.0345049691604817	-0.319595766338531	-0.331146818115843	0.23643363325	0.194942332	5.43216726944259	5.88499349745346	3.86784151534796	4.08708719845306	1.29885307640971	1.35602585719312	1.09691001300806	1.29003461136252	0.919078092376074	0.8750612633917	2.43949059038968	2.54257647626053
AE76	0.905544624789356	0.038892855859447	-0.245428333761532	-0.252796186530851	0.26768881225	0.22072740725	4.78887511577542	4.97358962342726	3.57580535132128	3.54180382094817	1.48429983934679	1.36172783601759	1.10720996964787	1.12710479836481	1	0.89209460269048	2.39967372148104	2.30663944102426
AE77	0.862200251345626	0.0314464293691805	-0.32470993878479	-0.328998668862544	0.3295702915	0.23839100525	4.75166394626099	4.7664128471124	3.25318044805912	3.51778292062877	1.49692964807321	1.51321760006794	0.89209460269048	0.954242509439325	1.00432137378264	0.929418925714293	2.20493352235414	2.02242837118549
AE78	0.803366259328117	0.0327178606758089	-0.263459312508464	-0.26181878596868	0.263500274	0.209672874	5.12920635774753	4.82639878218762	3.65430652188205	3.66365853014975	1.73719264270474	1.48995847942483	0.698970004336019	0.7481880270062	0.963787827345555	0.913813852383717	2.5478977175631	2.51745982654023
AE79	0.788134866493621	0.0279998901477357	-0.378113853002411	-0.377756909574773	0.6276575	0.5025	5.52717861880396	5.61668552089551	3.64448782641386	3.36831478300918	1.39619934709574	0.939519252618618	0.792391689498254	0.732393759822969	0.806179973983887	0.7481880270062	2.61415870950918	2.60595115756487
AE80	0.772908185251583	0.024278416170829	-0.444456210915638	-0.428517348706866	0.724625	0.7575	5.52107267298294	5.73475983746378	3.98871276084847	3.94078285683695	1.20682587603185	1.26245108973043	0.763427993562937	0.681241237375587	0.8750612633917	0.897627091290441	2.56038492297202	2.93555764509301
AE81	0.790823250185223	0.0767292720326155	-0.0387748661396024	-0.0302851658578127	0.516575	0.4525	5.40010607042854	5.41153553220933	3.8400056679372	3.42685270703537	1.55870857053317	1.41497334797082	0.707570176097936	0.755874855672491	0.792391689498254	0.7481880270062	3.03646919891546	3.16622283457208
AE82	0.818570672444445	0.0277285421279298	-0.338652760375128	-0.334475999753848	0.673	0.5175	5.59178782864559	5.64796945836297	1.6959192528314	1.64738297011462	0.707570176097936	0.982271233039568	0.681241237375587	0.716003343634799	0.716003343634799	0.716003343634799	1.66086547800387	1.89042101880091
AE83	0.676094366657089	0.0322827001158329	-0.168984191257257	-0.178208793580455	0.47425	0.5375	5.14597290280218	5.00130093302042	3.8259905284312	3.75271667011519	1.34439227368511	1.15228834438306	0.929418925714293	0.819543935541869	0.959041392321094	0.886490725172482	1.77524625974024	2.20655604409903
AE84	0.667597333146917	0.0200447173715261	-0.491518641289788	-0.474020983099633	0.519375	0.6875	5.71302828176036	5.60954105281728	3.90455596817877	3.90956137766245	1.0899051114394	1.29885307640971	0.732393759822969	0.812913356642856	0.826074802700826	0.963787827345555	1.8109042806687	2.39689644914252
AE85	0.840122556350913	0.0301184865035447	-0.330426388171591	-0.338076323398912	0.729	0.43	5.74923372698181	5.80787313200333	3.89879097879921	3.78485612457172	1.20139712432045	1.20411998265592	0.716003343634799	0.690196080028514	0.724275869600789	0.740362689494244	2.85521619473336	3.02098244291842
AE86	0.764123250656864	0.0206772967010526	-0.481251926990002	-0.479413150793961	0.6557	0.47	5.46119828862249	5.51047798428135	3.28644524171968	3.079452595311	0.986771734266245	0.863322860120456	0.724275869600789	0.707570176097936	0.763427993562937	0.755874855672491	2.39515159150454	2.4072208929274
AE87	0.687846056742366	0.0162510775266506	-0.557522475931334	-0.525251485351429	0.50555	0.46	5.40440605092127	5.60927417240459	3.94985820665278	3.89747863616044	1.56110138364906	1.2718416065365	1.05690485133647	0.934498451243568	0.977723605288848	0.799340549453582	2.56784945057311	2.85901814388889
AE88	0.859846671613755	0.0221409786403885	-0.499965209537763	-0.495932870314366	0.579	0.49	5.71041356635809	5.42651126136457	4.02303834702287	3.91326269027872	1.6159500516564	1.46089784275655	0.929418925714293	0.986771734266245	0.924279286061882	0.924279286061882	2.70850588095524	3.01724208454765
AE89	0.850951747536036	0.0269445826350926	-0.417633225004021	-0.42417142954333	0.601	0.5225	5.6063813651106	5.50873166944314	4.14119256983438	3.92089518305563	1.79309160017658	1.49554433754645	0.89209460269048	0.886490725172482	0.913813852383717	0.8750612633917	2.70731463358871	2.98775561673852
AE90	0.849637747124346	0.0444363808408686	-0.178547318664143	-0.190085429466783	0.7355	0.5225	5.68200962038212	5.47290265180366	3.83049884960831	3.74412079622569	1.26481782300954	1.17609125905568	0.845098040014257	0.963787827345555	0.819543935541869	0.770852011642144	2.61846649219908	2.88184096832493
AE91	0.860629025939382	0.131734328269342	0.206446707429883	0.205695943967203	0.652375	0.6925	5.19548452303376	5.2197154758555	4.09511702364304	3.94756114852434	1.76863810124761	1.67209785793572	0.897627091290441	0.89209460269048	0.963787827345555	0.90848501887865	2.6182573448404	2.93711651076705
AE94	0.75351629619742	0.0149531006207269	-0.596607974228811	-0.579591073163281	0.5668	0.47	5.64889644800393	5.34791518650169	3.97164920002611	3.88802496321748	1.68930885912362	1.80345711564841	0.89209460269048	1.03342375548695	0.982271233039568	0.919078092376074	2.59900923982334	2.985381560232
AE96	0.724428640803734	0.0195424670398806	-0.491332937996576	-0.482063228826663	0.575075	0.4775	5.30352003690728	5.32076922833869	3.68387519196024	3.471980753371	1.29885307640971	1.22530928172586	0.7481880270062	0.698970004336019	0.832508912706236	0.869231719730976	2.66959578102431	2.59725628292514
AE99	0.864836179930796	0.024951995753134	-0.487315333643467	-0.48065870664028	0.647125	0.5775	5.51047798428135	5.45247646132699	3.82641173634138	3.84749554034907	1.50379068305718	1.39445168082622	0.982271233039568	0.869231719730976	0.939519252618618	0.924279286061882	2.51388318561109	2.78490244988665
BB02	0.833866308863071	0.034040473083456	-0.237662264464628	-0.249106341424182	0.1985	0.3755	3.96378782734556	4.81424759573192	3.74611631710891	3.80458576943941	0.89209460269048	1.00432137378264	0.7481880270062	0.819543935541869	0.7481880270062	0.755874855672491	2.59571661994342	2.96477802202238
BB04	0.373579113612409	0.0167421008736754	-0.432905342539401	-0.417043184930011	0.44	0.355	4.98091193777684	4.70969386972779	3.38687334968418	3.63405889652626	0.863322860120456	0.812913356642856	0.707570176097936	0.716003343634799	0.740362689494244	0.755874855672491	2.86397678390439	2.91285947516235
BB05	0.79709820537171	0.0175529069619466	-0.504188555962367	-0.479360080430459	0.475	0.40675	5.14875685132179	5.18836592606315	1.91142396537629	3.53094210399413	0.690196080028514	1.37106786227174	0.681241237375587	0.740362689494244	0.724275869600789	0.755874855672491	1.65801139665711	2.70079022137435
BB06	0.851140091754974	0.0286300751454555	-0.392714916972961	-0.395095643065988	0.4325	0.3775	4.09342168516223	4.82249498527875	0.877946951629188	3.63122047613855	0.863322860120456	1.0899051114394	0.724275869600789	0.740362689494244	0.732393759822969	0.755874855672491	2.03422726077055	2.66162340922923
BB07	0.849758006486377	0.0220422844092656	-0.476772248348306	-0.460925210319628	0.5175	0.52	4.78175537465247	4.71808629478309	0.880813592280791	3.59204344962936	0.799340549453582	1.22788670461367	0.690196080028514	0.724275869600789	0.7481880270062	0.755874855672491	1.99166900737995	2.71866773531621
BB08	0.324788103766622	0.00949717320809169	-0.0768505032147739	-0.0924349348592626	0.2125	0.25325	4.75777549101193	5.35554729573213	2.57789373830359	3.67459019604297	0.934498451243568	2.32776748990273	0.732393759822969	0.924279286061882	0.755874855672491	0.819543935541869	2.04218159451577	2.91650658711516
BB09	0.778014176385126	0.0157337297619972	-0.504437024374771	-0.49136223293987	0.5775	0.405	4.95784663370815	5.29203443599474	3.54958561118367	3.70984214009153	1.52113808370404	1.70757017609794	0.732393759822969	0.732393759822969	0.7481880270062	0.799340549453582	2.74036268949424	3.05319372760087
BB10	0.938275678364722	0.0446909265235705	-0.216923910239507	-0.218367177699118	0.19	0.43	3.42324587393681	5.18878791263747	3.92755256422416	3.61465997586232	0.959041392321094	1.45484486000851	0.698970004336019	0.763427993562937	0.792391689498254	0.770852011642144	2.30384377488865	2.75747194776567
BB11	0.684725728624761	0.0230057468700483	-0.360559266658256	-0.352191007290769	0.43	0.33775	5.31618009889345	5.59078612386088	1.65896484266444	3.5606776205412	0.707570176097936	1.28330122870355	0.681241237375587	0.770852011642144	0.7481880270062	0.770852011642144	1.67851837904011	2.73814608871206
BB12	0.723616701356145	0.0178674558773638	-0.554268356282951	-0.540828415066206	0.51	0.415	4.52569252450501	4.63548374681491	1.12057393120585	3.63892333443396	0.690196080028514	1.39794000867204	0.690196080028514	0.740362689494244	0.724275869600789	0.792391689498254	1.68484536164441	2.80016699020136
BB14	0.71337970456594	0.0139212666352914	-0.432465866512409	-0.412479330072037	0.32	0.25325	4.72713442376049	4.6707095952238	1.62787769457997	3.62597573552567	0.770852011642144	1.02530586526477	0.681241237375587	0.707570176097936	0.880813592280791	0.755874855672491	2.10105935490812	2.60948768985329
BB15	0.674116855427292	0.00809706332235908	-0.522902872788086	-0.497373957315078	0.3925	0.3395	5.34084054981233	5.42414630575516	3.13931224557867	3.36857507895834	0.792391689498254	0.770852011642144	0.770852011642144	0.7481880270062	0.724275869600789	0.7481880270062	2.33485568961729	2.59050746200858
BB16	0.654867891982399	0.0299807483649253	-0.220185763068212	-0.225843551439221	0.1825	0.2145	4.32221929473392	4.63798978078469	2.83657727484065	3.35740117513951	0.8750612633917	1.00860017176192	0.770852011642144	0.732393759822969	0.732393759822969	0.763427993562937	2.51666755909904	2.45636603312904
BB17	0.639397551433514	0.0101729008797495	-0.740946019032591	-0.677981742884649	0.4525	0.324	4.62787769457997	4.98967224762387	4.16737051040874	3.98337140821217	0.869231719730976	1.84260923961056	0.806179973983887	0.7481880270062	0.740362689494244	0.7481880270062	2.25743856685981	2.25671774597749
BB18	0.455731845791741	0.0301333633502415	-0.0877590860977113	-0.0961573900047895	0.5275	0.3925	4.29225607135648	4.54592532935584	1.90875301918453	3.45564414020607	0.740362689494244	1.08635983067475	0.698970004336019	0.755874855672491	0.732393759822969	0.7481880270062	2.39181692361325	2.50704587242733
BB20	0.215098132892465	0.00477550134131364	-0.51840444489477	-0.490944669899089	0.4175	0.34	4.77195474896395	4.75739602879302	4.05110812563113	4.09889626988251	0.89209460269048	1.14612803567824	0.740362689494244	0.880813592280791	0.785329835010767	0.8750612633917	1.83632411570675	2.3727279408856
BB21	0.414917985347903	0.0137029766183084	-0.742763739568004	-0.677568856815001	0.445	0.47	4.87419180467907	4.698535492562	3.52872392326099	3.4963760540124	0.944482672150169	0.954242509439325	0.690196080028514	0.732393759822969	0.740362689494244	0.785329835010767	2.60616631460762	2.67760695272049
BB23	0.870502952471273	0.0266749440670167	-0.340402779036269	-0.337551650518912	0.37	0.242	4.8208579894397	4.76678451549786	1.65369479531508	3.55928404917113	0.716003343634799	1.05307844348342	0.690196080028514	0.740362689494244	0.724275869600789	0.732393759822969	1.69983772586725	2.72680868252496
BB24	0.138325875808265	0.00549320629614874	-0.527036424432778	-0.499521369558165	0.375	0.3925	3.96614173273903	4.61804809671209	1.90606554475524	3.44981767972029	0.672097857935718	1.16435285578444	0.672097857935718	0.732393759822969	0.716003343634799	0.716003343634799	1.67942789661212	2.74004672405149
BB25	0.784561304879585	0.0194871077542667	-0.515128818876561	-0.503857900422318	0.35175	0.2715	4.74154551677621	5.02999217537785	1.02118929906994	3.63797978539965	0.880813592280791	1.14921911265538	0.672097857935718	0.716003343634799	0.724275869600789	0.851258348719075	2.31806333496276	2.6182573448404
BB26	0.727431361982324	0.00755150458306225	-0.909145158805689	-0.912249286788553	0.45	0.36225	4.27531135454181	4.70286117057293	3.39387340414938	3.45246880039363	1.01703333929878	1.14921911265538	0.681241237375587	0.724275869600789	0.755874855672491	0.785329835010767	2.088844562727	2.34966598409663
BB33	0.794141389499746	0.0281307405910019	-0.389510558402103	-0.387981042863533	0.160425	0.275	4.56643749219507	5.40798542130814	3.42593344441204	3.62448320704028	2.30016053695135	0.806179973983887	0.690196080028514	0.653212513775344	0.707570176097936	0.698970004336019	2.58081097266095	2.73439974252057
BB34	0.867082135632502	0.0351601154743754	-0.106679075590952	-0.121961034515415	0.024	0.265	3.64836001098093	5.01598810538413	0.989004615698537	3.73524748996913	1.13987908640124	1.0899051114394	0.698970004336019	0.681241237375587	0.698970004336019	0.724275869600789	1.51188336097887	2.49471102520526
BB36	0.788223397145025	0.0199858385695462	-0.597255777638169	-0.584345679381056	0.024	0.231	3.14612803567824	4.7701152947871	0.942008053022313	3.2721202088011	1.12385164096709	1.79588001734408	0.698970004336019	0.690196080028514	0.698970004336019	0.826074802700826	1.49415459401844	2.2132520521964
BB37	0.79640159457369	0.0158464277060839	-0.622498882220039	-0.669030876757571	0.0712875	0.2325	4.51054501020661	4.89569872695931	3.76849380568787	3.86629915646034	1.57634135020579	1.07554696139253	0.724275869600789	0.724275869600789	0.698970004336019	0.716003343634799	2.05115252244738	2.36059341356525
BB38	0.627048920548258	0.0254074406489353	-0.110483086850762	-0.126634871994781	0.09704	0.235	4.72875947516787	4.8494194137969	1.6570558528571	3.42126655962207	1.18752072083646	1.03342375548695	0.690196080028514	0.732393759822969	0.681241237375587	0.716003343634799	1.52762990087134	2.29556709996248
BB39	0.738881936543147	0.0381969204431235	-0.197329631971359	-0.208370093680049	0.0847175	0.23	4.63548374681491	4.7863964613723	3.09762167255692	3.31793803963606	2.21801004298436	1.4345689040342	0.785329835010767	0.778151250383644	0.799340549453582	0.812913356642856	2.47187819930729	2.74397986524184
BB43	0.627466989218349	0.02002467785752	-0.297590133146617	-0.314615459561968	0.130105	0.245	4.12548126570059	4.64689362416775	3.58677853215564	3.7420531437264	1.33243845991561	1.73158876518674	1.04139268515823	0.977723605288848	0.924279286061882	1.62736585659273	1.69372694892365	2.41329976408125
BB44	0.640124644399284	0.00826804041959517	-0.870629542630831	-0.84796101541013	0.0823375	0.2	5.14906508020762	5.62803112842078	3.55920017268276	3.97675794159458	1.83758843823551	1.22788670461367	0.7481880270062	0.770852011642144	0.944482672150169	0.903089986991944	1.92324401863028	2.51481329499929
BB45	0.743245381494758	0.0346465786468162	-0.223636007454044	-0.235044118709257	0.0445	0.2135	3.90036712865647	5.09743085394424	1.07003786660776	3.81388775494871	1.17318626841227	0.973127853599699	0.707570176097936	0.681241237375587	0.690196080028514	0.724275869600789	1.51454775266029	2.45757914699576
BB46	0.932975994911191	0.0357658021507719	-0.330832103194977	-0.333536968119783	0.0837605	0.26325	5.01494034979294	5.13545069934551	2.26881190373978	3.49791744282418	1.13353890837022	1.66931688056611	0.698970004336019	0.755874855672491	0.732393759822969	0.863322860120456	1.50514997831991	2.27137687189407
BB47	0.913624261553684	0.0381518118632611	-0.313413773070019	-0.315929645636267	0.027	0.32325	3.13033376849501	5.02836788369706	3.20561030990252	3.37354641901304	2.83910078270715	1.8481891169914	1.31175386105575	1.30749603791321	1.04532297878666	1.00432137378264	3.11634203918834	3.46239799789896
BB48	0.292753791851202	0.010196326080453	-0.185201744435336	-0.205105085335471	0.104	0.28	3.65801139665711	4.88280904139244	0.937016107464814	3.2147908820763	1.13353890837022	1.84757265914211	0.681241237375587	0.755874855672491	0.681241237375587	0.886490725172482	1.50379068305718	2.291590825658
BB49	0.950693082843734	0.039677598605265	-0.238287758027749	-0.247770203718334	0.0145	0.1725	3.57978359661681	5.25887662937213	0.946943270697825	3.2047573846986	1.13353890837022	1.78103693862113	0.681241237375587	0.724275869600789	0.672097857935718	0.869231719730976	1.49692964807321	2.33081946649584
BB50	0.651705090098039	0.0263476707457545	-0.102446017311186	-0.119463107782537	0.066250325	0.13275	5.02036128264771	5.69451745381116	3.31055525058997	3.43452898542744	3.07518185461869	1.34439227368511	0.799340549453582	0.778151250383644	0.819543935541869	0.880813592280791	3.4063187189482	3.57497988821399
BB51	0.772288845519889	0.0190562776842975	-0.570471110347196	-0.604131814635749	0.137635	0.245	4.48713837547719	4.5556988947189	3.3092254889848	3.63828454119877	1.24797326636181	1.08635983067475	0.716003343634799	0.792391689498254	0.707570176097936	0.763427993562937	1.68394713075151	2.12024479554637
BB53	0.147795652242361	0.014605638019624	-0.0816768457466196	-0.097396874547421	0.0525	0.21	3.84198480459011	5.464191370641	3.03696805545898	3.26903402235069	1.62940959910272	0.977723605288848	0.690196080028514	0.819543935541869	0.690196080028514	0.707570176097936	1.99431715266964	2.29468662427944
BB54	0.831341922887081	0.133210967311665	0.212102840024736	0.212230328696184	0.10703	0.242	5.40790054014264	5.21152099724023	3.14829409743475	3.68616687040963	1.70070371714502	1.56937390961505	0.724275869600789	0.755874855672491	0.698970004336019	0.826074802700826	1.81023251799508	2.7048366062114
BB55	0.928461697448545	0.0438049409817927	-0.0568107869416935	-0.0721381344897601	0.0905	0.3075	3.43933269383026	5.10448711131239	3.81371105729769	3.87049169178647	1.36735592102602	1.12057393120585	0.7481880270062	0.707570176097936	0.724275869600789	0.716003343634799	1.99255351783214	2.27346427262135
BB56	0.926891098086132	0.0381310468334561	-0.288516233164091	-0.294784673159099	0.0765105	0.30575	3.74036268949424	4.64787176530623	3.69813100609196	3.95279728465012	1.87563993700417	1.17609125905568	0.763427993562937	0.826074802700826	0.763427993562937	0.724275869600789	1.97358962342726	2.58512218630682
BB59	0.164709133380294	0.00708304504281126	-0.0739646961161996	-0.0897512623775367	0.04575	0.24225	4.02530586526477	5.25935492730803	3.39918031809204	3.45214691910128	1.34830486304816	0.934498451243568	0.897627091290441	0.819543935541869	0.770852011642144	0.7481880270062	1.69019608002851	1.96189547366785
BB62	0.919001970501535	0.0460111698953693	-0.125884419093191	-0.137985158024708	0.10156	0.2275	5.22193559982801	5.26197619139781	3.66880509741182	3.81339081801731	1.17318626841227	1.56110138364906	0.724275869600789	0.732393759822969	0.707570176097936	0.785329835010767	1.54777470538782	3.24919835739111
BB65	0.824078331449008	0.0217369688036408	-0.545500170428489	-0.534632341569387	0.089	0.17525	5.33071807873259	5.58314207385993	3.3962603882149	3.77323774688938	1.19033169817029	0.982271233039568	0.792391689498254	0.851258348719075	0.707570176097936	0.7481880270062	1.53147891704226	2.3285834497142
BB67	0.849964292112849	0.0351462791714733	-0.357972569337445	-0.356397134299091	0.0255	0.2255	3.27875360095283	5.02510096104681	3.72976396184555	3.82249498527875	1.38381536598043	1.32837960343874	0.845098040014257	0.732393759822969	0.7481880270062	1.12057393120585	1.60314437262018	2.43071988786328
BB68	0.388994804987789	0.00720776536233427	-0.097263914305149	-0.113831036016674	0.126	0.33	4.27300127206374	4.90363251608424	3.68392914717082	3.60263505062378	1.40823996531185	1.19865708695442	0.716003343634799	0.7481880270062	0.7481880270062	0.857332496431269	1.66086547800387	2.13640344813399
BB69	0.831375295535526	0.0226660971367955	-0.53495818600992	-0.527198469972316	0.07517	0.26425	3.5910646070265	5.02694162795903	1.07736790528416	3.76704449424367	1.13353890837022	0.903089986991944	0.698970004336019	0.672097857935718	0.698970004336019	0.724275869600789	1.51851393987789	2.29688447553855
BB70	0.804567743567383	0.0231771823305497	-0.540591152920883	-0.529139358547139	0.09392	0.27675	4.28330122870355	4.68529378138678	3.85916833045259	3.73919246733696	1.67486114073781	0.897627091290441	0.778151250383644	0.707570176097936	0.732393759822969	0.732393759822969	2.13225968953104	2.25066391946324
BB71	0.098877355064598	0.00302894229217754	-0.171633179063847	-0.192411252111598	0.027500975	0.224	3.53781909507327	5.03059972196595	2.76889697308849	3.19630056730107	1.63848925695464	1.76937732607614	0.740362689494244	0.732393759822969	0.763427993562937	0.845098040014257	1.7701152947871	2.07954300740291
BB72	0.26632262554117	0.0113132450955459	-0.0857296694960848	-0.101523323152073	0.0342500002	0.22025	3.89486965674525	5.06911285138712	2.27703588817211	3.3900072686997	1.16136800223497	1.5854607295085	0.716003343634799	0.724275869600789	0.690196080028514	0.792391689498254	1.5327543789925	2.33705972632052
BB73	0.827295728655803	0.0265835376120533	-0.480848798840382	-0.47000184365768	0.04035	0.1595	3.93449845124357	4.66651798055488	3.06007427473632	3.37764313580537	1.18184358794477	0.944482672150169	0.770852011642144	0.826074802700826	0.763427993562937	0.755874855672491	1.53529412004277	2.04532297878666
BB74	0.653494549941505	0.0268850365295168	-0.0972728987571107	-0.114345078282979	0.056	0.1815	5.60948768985329	5.43719545247852	3.34502066154211	3.86117583551303	1.22010808804006	1.17897694729317	1.76566855475901	1.84447717574568	0.732393759822969	0.7481880270062	1.51587384371168	2.37511468469223
BB75	0.861054098112253	0.0269419855385666	-0.41457841157066	-0.421918573606477	0.047255	0.279	3.88649072517248	5.39958720001808	3.79027460569221	3.76644631029523	1.30102999566398	0.959041392321094	0.716003343634799	0.7481880270062	0.724275869600789	0.740362689494244	1.66931688056611	2.16761267272753
BB76	0.184822360237104	0.00474173854874094	-0.182111664808732	-0.202426583457662	0.10975	0.2775	3.17609125905568	5.13289976994448	3.37661345085779	3.75467317045755	1.16136800223497	1.10380372095596	0.732393759822969	0.785329835010767	0.724275869600789	0.755874855672491	1.51719589794997	2.37162192717602
BB77	0.833785955094013	0.0239034149938004	-0.49851849154596	-0.493675682386588	0.03027075	0.21175	3.82607480270083	5.07261747654524	1.11058971029925	3.22528343009444	1.15228834438306	1.75127910398334	0.698970004336019	0.755874855672491	0.681241237375587	0.863322860120456	1.52374646681156	2.23854788768133
BB78	0.706601822531491	0.0213370319430335	-0.379133569055659	-0.391030394795396	0.02025	0.2295	3.40654018043396	5.20411998265593	3.54362111156403	3.71356613903524	1.29885307640971	1.46538285144842	0.716003343634799	0.763427993562937	0.707570176097936	0.845098040014257	1.63346845557959	2.16106838547117
BB79	0.577722622202312	0.0120636598613913	-0.101405620440698	-0.1183600744755	0.103975	0.29275	4.68574173860226	5.40815513388626	3.70898571045123	3.83186337814383	1.16136800223497	0.903089986991944	0.724275869600789	0.716003343634799	0.707570176097936	0.792391689498254	1.6954816764902	2.60681114691896
BB80	0.315800641712718	0.0163335668289655	-0.0805251395327379	-0.0954156094833358	0.092295	0.2125	4.91645394854993	5.4428715548212	3.97339804854447	3.91796739099422	2.12287092286444	1.43775056282039	0.740362689494244	0.763427993562937	0.763427993562937	0.826074802700826	2.27207378750001	2.63467875217868
BB81	0.679236498556872	0.029432549595527	-0.280694326168142	-0.282695419503374	0.056325	0.15225	4.38471174293828	5.08134730780413	3.26930275086934	3.52693989442202	1.39445168082622	1.25527250510331	0.792391689498254	0.939519252618618	0.778151250383644	0.7481880270062	1.74585519517373	1.91907809237607
BB82	0.591493835812198	0.00548784480693923	-1.02946215946261	-1.02457086649197	0.09	0.2285	4.66464197555613	5.62946056964229	3.06037672139536	3.81790566490768	1.58319877396862	1.40654018043396	0.755874855672491	0.778151250383644	0.903089986991944	0.869231719730976	1.83695673705955	2.43616264704076
BB83	0.554964889260463	0.0221339825591557	-0.201280509874963	-0.216620972469728	0.07075	0.223	5.09569228283979	5.54943243709754	3.07653121925381	3.90040536673876	1.51321760006794	1.37291200297011	0.7481880270062	0.799340549453582	0.845098040014257	0.838849090737255	1.76715586608218	2.38111508070985
BB84	0.605830764895707	0.0122912912819151	-0.568128056207971	-0.545878412654275	0.106025	0.265	5.29325203314782	5.78968645281712	1.18610837981321	3.22683181065872	1.13987908640124	1.67209785793572	0.698970004336019	0.732393759822969	0.716003343634799	0.880813592280791	1.5092025223311	2.25066391946324
BB85	0.228878069487613	0.00675943541319026	-0.0772464593623184	-0.0930035582628944	0.0312545	0.25775	3.8481891169914	5.32623342090424	2.94738470168474	3.71661259872264	1.16136800223497	1.00432137378264	0.707570176097936	0.7481880270062	0.724275869600789	0.732393759822969	1.96614173273903	2.68259629146055
BB86	0.648457322032748	0.0126573668822981	-0.631791820588019	-0.673861436578871	0.14125	0.3275	4.69940408181534	5.01241537476243	3.15472820744016	3.43617855497218	1.16435285578444	1.25767857486918	0.707570176097936	0.681241237375587	0.732393759822969	0.732393759822969	1.4983105537896	2.31175386105575
BB87	0.912914271570974	0.0325671369695151	-0.335945381061208	-0.351907446716336	0.066025	0.272	4.14612803567824	4.63245729218472	3.20884428934074	3.84842929857558	1.15533603746506	1.06445798922692	0.716003343634799	0.934498451243568	0.740362689494244	0.732393759822969	1.50514997831991	2.41363499719856
BB89	0.646540693409229	0.0251893146407878	-0.0881419157630521	-0.105148161927993	0.111825	0.19525	4.83821922190763	5.23867324328384	1.21218760440396	3.22738530627216	1.15228834438306	1.70586371228392	0.698970004336019	0.770852011642144	0.716003343634799	0.903089986991944	1.52113808370404	2.30059548388996
BB90	0.749368077741622	0.0153868876151473	-0.68923465389071	-0.668908303541972	0.0255	0.24725	3.37106786227174	5.02938377768521	4.17955179116519	3.95313606301416	1.29446622616159	1.68663626926229	0.7481880270062	0.707570176097936	0.740362689494244	0.954242509439325	1.58883172559421	2.06781451116184
BB91	0.846608012221272	0.0241788728407677	-0.516812109087812	-0.502112995525851	0.0533	0.19875	4.91035755727288	5.36921585741014	3.70856960565984	3.66147666333092	1.26007138798507	0.944482672150169	0.732393759822969	0.690196080028514	0.740362689494244	0.716003343634799	1.55630250076729	1.90579588036787
BB92	0.576883797832852	0.0218775830446708	-0.139563067568664	-0.157235920029546	0.0475725	0.308	4.10380372095596	4.90687353472207	3.71614112675597	3.64110708569255	2.08098704691089	1.30749603791321	0.732393759822969	0.707570176097936	0.740362689494244	0.755874855672491	2.22556771343947	2.576686805201
BB93	0.489410664120804	0.0235586385256283	-0.359460997926631	-0.352726094328936	0.1759	0.325	3.51851393987789	4.38471174293828	3.34168177450335	3.50398804478832	1.30319605742049	1.04139268515823	0.880813592280791	0.838849090737255	0.913813852383717	0.792391689498254	1.69019608002851	2.09586645347854
BB94	0.83451201326018	0.0320155199352899	-0.249824022820089	-0.259888607202081	0.046725	0.18975	4.65991620006985	5.08421868673924	3.84937334050988	3.8086970026115	1.86391737695786	0.934498451243568	0.819543935541869	0.770852011642144	0.740362689494244	0.732393759822969	2.28465628278852	2.44027921323559
BB97	0.192473671464316	0.00690072461372001	-0.0716420497052992	-0.0871004570601046	0.055375	0.21025	4.1846914308176	5.10294796800537	3.6005046066455	3.58808113584454	1.14921911265538	0.977723605288848	0.732393759822969	0.740362689494244	0.698970004336019	0.7481880270062	2.27485032001666	2.41614103116833
BB98	0.188291126521964	0.00801174871629713	-0.501966427041442	-0.477300519300544	0.11075	0.355	4.01703333929878	4.85247999363686	1.10380372095596	3.70767235101475	1.15228834438306	1.01283722470517	0.716003343634799	0.763427993562937	0.690196080028514	0.716003343634799	1.48287358360875	2.39619934709574
BB99	0.681592400780663	0.0353994190889146	-0.103698489739953	-0.110093220824554	0.053475	0.2655	3.98900461569854	5.13433651094868	3.31602279331422	3.12611516557901	2.7701152947871	0.924279286061882	0.944482672150169	0.8750612633917	0.845098040014257	0.707570176097936	2.77026273817059	3.27854783377585
BCW01	0.469881740576117	0.018336832655197	-0.0764300600516025	-0.0927793642585041	0.2743617166	0.3176949812	5.47427455472555	5.10530576279308	3.89486080479299	3.71489615293149	1.43584436598444	1.49415459401844	0.72916478969277	0.754348335711019	0.857332496431269	0.822168079368018	2.53595202709217	2.73380693642884
BCW02	0.33270862721671	0.016863412020503	-0.419954791413621	-0.406048650813364	0.4551000338	0.4455725326	5.35249123998817	5.01300585001574	3.67607143733691	3.49716747673401	1.30621050816776	1.52426626876698	0.795184589682424	0.72916478969277	0.915927211697116	0.889861721258188	2.57703198562603	2.75745676503281
BCW03	0.423864972000222	0.0213778513298888	-0.374461700141578	-0.366267425944026	0.5701065704	0.4476845778	5.38937874795251	5.08120323930658	3.06629610154099	3.21456835443001	0.974971994298069	0.862131379313037	0.695481676490197	0.716003343634799	0.783903579272735	0.778151250383644	2.76890436715991	2.93056191401322
BCW04	0.788231937048617	0.0287727420406077	-0.301227170595628	-0.314068156964059	0.4721611864	0.436844959	5.4866854545842	5.10530576279308	3.31843900420019	3.60128625832333	1.55630250076729	1.58251788360406	0.702430536445525	0.920123326290724	0.862131379313037	1.16076856186113	2.07393819063525	2.62250414669454
BCW05	0.424179476884498	0.0170984734102639	-0.0740116208567021	-0.0904848660543516	0.1609992114	0.2680652508	5.41730558324453	4.81557774832427	3.69021735107405	3.72353447825008	1.06445798922692	1.0068937079479	0.702430536445525	0.766412847112399	0.789580712164425	0.822168079368018	1.91381385238372	2.48195831565797
BCW06	0.734807334145031	0.0201905631502773	-0.551925912881789	-0.557794400039448	0.2597810748	0.3662265634	5.55591628955295	5.31099052713458	3.47857803815094	3.63494053913696	1.87760167972927	1.94051648493257	0.783903579272735	0.871572935545879	0.889861721258188	0.907411360774586	2.21144093557867	2.52082402235596
BCW07	0.324682642621116	0.0119219029524288	-0.0728920742842579	-0.0892487421379532	0.4473399908	0.3827327236	5.61151088712666	5.30758160475063	3.54635508672214	3.52475950502886	1.17724783625562	0.985875357308394	0.822168079368018	0.842609239610562	0.907411360774586	0.842609239610562	2.15253294843453	2.16577833129364
BCW08	0.604971079947755	0.0195761384686808	-0.0649626748739115	-0.0811523008292045	0.211702664	0.2989462172	5.43609900948743	5.53892545030358	3.17460633150358	3.2664857058388	1.60205999132796	1.24154648059655	0.695481676490197	0.722633922533812	0.903089986991944	0.862131379313037	1.78675142214556	2.06803735961379
BCW09	0.193116482000366	0.00990016402538817	-0.481809620169174	-0.459314297901009	0.2073424918	0.2865832508	4.54007908880417	5.50275476578036	3.83907310372953	3.91335813378896	1.35487642251623	1.35640832703898	0.778151250383644	0.852479993636856	0.924279286061882	0.928395852256714	2.63996434864037	2.89440468516855
BCW10	0.494727868065563	0.0263871845440599	-0.334363566219859	-0.327861905827409	0.337623659	0.3992190778	5.65720888121736	5.83980474520315	3.78409496953053	3.94278759403901	1.04296907339318	1.59150980899465	0.783903579272735	0.847572659142112	0.894316062684438	1.01367969729119	2.45987476929897	2.74557441140351
BCW11	0.703092638831204	0.0161963101254564	-0.687543433644574	-0.634394156050245	0.4669134594	0.4801941968	5.38050067489919	5.2809424059987	3.64909330044417	3.85783887799498	1.09342168516224	1.60552052343747	0.741939077729199	0.857332496431269	0.940516484932567	1.03662889536216	2.17283636012271	2.70160252002329
BCW12	0.576943297385684	0.0269542371463949	-0.0662983845801822	-0.0824686206469121	0.376825701	0.368036076	5.37854324716164	5.40966266124446	3.64585438365374	3.6842563318395	1.67394199863409	1.71332250498703	0.695481676490197	0.760422483423212	0.889861721258188	0.989449817666692	2.43648069500949	2.75927491371911
BCW13	0.241694092093969	0.00971217298853411	-0.080666895496798	-0.0968821931405238	0.3827529844	0.4234674254	5.43825747210689	5.06996393785076	3.63602225966371	3.76582942994708	1.36097188372594	1.23954972084047	0.754348335711019	0.862131379313037	0.889861721258188	0.871572935545879	2.69492093466678	2.74394854103382
BCW14	0.522145184929389	0.0118495453480238	-0.587104383004648	-0.552602988777094	0.184134482	0.2941640936	5.46876074737046	5.33613939860856	3.61753710776529	3.38741830373174	1.29578694025161	1.29225607135648	0.822168079368018	0.754348335711019	0.857332496431269	0.822168079368018	2.93807920327963	3.07267626031386
BCW15	0.539703459597366	0.0250054538693443	-0.0756011785973817	-0.0918789042055193	0.4067707456	0.369648207	5.26782854204734	5.37584643630916	3.79824999837847	3.7151372323309	1.40414924920969	1.16316137497702	0.842609239610562	0.885361220031512	0.920123326290724	0.852479993636856	2.42068171770385	2.49548883310751
BCW16	0.483840443238101	0.0249148794708146	-0.033723463525298	-0.0487294584085143	0.4243713256	0.394555353	5.5963771439976	5.42318031510479	3.40617896975237	3.63798178449506	1.65896484266444	1.52737208282761	0.73559889969818	0.789580712164425	0.862131379313037	0.852479993636856	2.55794007755334	2.62101001282894
BCW17	0.61549324344487	0.0257142479432091	-0.064810331412339	-0.0808633437513571	0.45856524	0.337182713	5.47989188282086	5.41723912146738	4.00487313611764	3.82048782858172	1.20411998265592	1.19975517725347	0.716003343634799	0.72916478969277	0.827369273053825	0.789580712164425	2.63467875217868	2.46323582684099
BCW18	0.630024889080764	0.0260392823877454	-0.0696923942863594	-0.0859000946806739	0.3891927744	0.3960721504	5.17248616968693	5.49035183668448	3.63282158227898	3.60288870262081	1.07918124604762	1.81637388875236	0.754348335711019	0.806179973983887	0.811575005870593	0.889861721258188	2.20887113824693	2.54117970897645
BCW19	0.527218529755653	0.0251894601047458	-0.0688384598526023	-0.084906872545242	0.36811828	0.32596315	5.32927581223645	5.24462342843235	3.65790829913726	3.51190474110402	1.23146959043068	1.1044871113124	0.766412847112399	0.7481880270062	0.842609239610562	0.811575005870593	3.11562382317855	2.97012362683421
BCW20	0.673366414402167	0.0174396786550376	-0.566230358830167	-0.550242598387632	0.4866371672	0.4352064728	5.45630528839408	5.15069505114271	3.44565401197072	3.44319412089182	1.50623435961213	1.21906033244886	0.695481676490197	0.702430536445525	0.837588438235511	0.811575005870593	2.37261746617896	2.41483969833693
BCW21	0.157504425194213	0.00681996142139243	-0.0804580277792435	-0.0967949899118511	0.4417645666	0.3872227086	5.8080218143876	5.55596458474142	4.04791784811339	3.75283484611157	1.65513843481138	1.45818443557026	0.911690158753861	0.880813592280791	0.903089986991944	0.876217840591642	2.84683175282326	2.82793761996748
BCW22	0.0848186452973959	0.00358164686413474	-0.54113655589943	-0.511383964025664	0.2373660332	0.2712340282	4.77202816532485	5.18069920129603	3.51414913447544	3.63251802842451	1.06145247908719	1.62736585659273	0.760422483423212	0.789580712164425	0.894316062684438	0.920123326290724	2.25815819334079	2.69062130311918
BCW23	0.11074006156049	0.00466077339696055	-0.0740996788249264	-0.0904596938139947	0.537662607	0.4797564834	5.28869626059026	5.30894838630958	3.7740408056298	3.78136469286812	1.34084054981233	1.52943035436699	0.806179973983887	0.862131379313037	0.932473764677153	0.974971994298069	2.27378807956752	2.76557915389784
BCW24	0.542599840602723	0.0186156082615579	-0.0751081743281297	-0.0917232285103184	0.4850586266	0.4066685868	5.55885251169846	5.36563771579461	3.59880800946259	3.63974937698772	1.03981055414835	1.51054501020661	0.866877814337499	0.806179973983887	0.880813592280791	0.885361220031512	2.30241751915062	2.63716939427254
BCW25	0.213956173888703	0.0081313593667614	-0.0755267341946727	-0.0919391893561326	0.3813381104	0.3486921752	5.48281643583817	5.24432661023064	3.81017335310697	3.81825493361142	1.38309692994909	1.47129171105894	0.73559889969818	0.847572659142112	0.959994838328416	1.04921802267018	2.47409965930125	2.70517924487368
BCW26	0.341321545474718	0.0176012333413193	-0.417043342936884	-0.40280701872971	0.3698072332	0.3770464664	5.76375733343608	5.29340675546278	3.91858596206533	3.8832297647377	1.42422807069598	1.51054501020661	0.72916478969277	0.72916478969277	0.963787827345555	0.842609239610562	2.61942727488149	2.81168222583951
BW01	0.873233767194981	0.0262210993102614	-0.410733147161711	-0.408750501964898	0.933825	0.6525	5.98479725708929	5.91497747244433	3.98169631726448	3.97965989303497	1.48713837547719	1.43933269383026	0.913813852383717	1.07918124604762	0.851258348719075	0.832508912706236	2.65896484266443	3.10095610305949
BW02	0.841552923783971	0.0164413078807194	-0.557757775318889	-0.540072482011612	0.955	1.015	5.87742894078822	5.87526388687479	3.80640384936321	3.72437009308714	0.929418925714293	0.968482948553935	0.770852011642144	0.799340549453582	0.770852011642144	0.7481880270062	2.11327469246435	2.35276119172383
BW03	0.901773420016014	0.0306278627801614	-0.375275163038892	-0.378760217181417	1.107	1.06	5.99697111574354	5.83505610172012	3.69280287095	3.51751259301644	1.32428245529769	1.45178643552429	0.886490725172482	0.913813852383717	0.857332496431269	0.838849090737255	2.3014640731433	2.462248215355
BW04	0.922013976326648	0.0432358815333452	-0.233494412715418	-0.227841750863525	0.95025	0.82	5.92739602980313	5.70977860184823	3.6981048972497	3.6011252529877	1.24551266781415	1.29666519026153	1.03342375548695	1.10720996964787	0.949390006644913	0.886490725172482	1.8998205024271	2.21404867941194
BW05	0.915978621070831	0.0384512265849545	-0.319234375861879	-0.315532791324405	0.81375	0.6375	5.9155844898373	5.96284268120124	3.65889340677614	3.41396997174806	0.832508912706236	0.716003343634799	0.690196080028514	0.698970004336019	0.732393759822969	0.732393759822969	1.98000337158375	2.22036963245139
BW06	0.894099051979882	0.0363205377277108	-0.333442981514456	-0.329665374481939	0.7754	0.5875	5.83768311421203	5.7435881501599	4.14669689893267	4.198115255344	1.56584781867352	1.46982201597816	1.04921802267018	0.959041392321094	0.880813592280791	0.913813852383717	1.90363251608424	2.18012587516405
BW07	0.887751654769638	0.0298564194212647	-0.368824813456191	-0.363771648079874	0.955	0.655	5.81408103984037	5.65600232068296	3.58218272064628	3.41458899436304	1.16731733474818	1.21748394421391	0.819543935541869	0.851258348719075	0.845098040014257	0.778151250383644	2.02816441942447	2.57275546515422
BW08	0.87164206687057	0.0286371890721903	-0.366023895177615	-0.362468400276841	1.034	0.66	5.92556990954338	5.66614342729156	4.17780334311486	3.95237343972757	1.31386722036915	1.1430148002541	0.819543935541869	0.968482948553935	0.924279286061882	0.806179973983887	3.10673470009785	3.01422642938923
BW09	0.921001416447652	0.0319391385877235	-0.35681338052837	-0.359869620797692	0.7226625	0.4975	5.84655358675766	5.75985662734068	3.91686961943101	3.87742606122369	1.65896484266444	1.36921585741014	0.924279286061882	0.934498451243568	0.863322860120456	0.770852011642144	2.6262376851469	2.89591954531002
BW10	0.865234710035533	0.0261940311124715	-0.402549655893776	-0.39502042060337	0.93675	0.655	5.6177863946964	5.82467893030867	3.86069128869544	3.80969435871692	1.53781909507327	1.40823996531185	0.792391689498254	0.799340549453582	0.812913356642856	0.826074802700826	2.50758603976301	2.80604423574809
BW11	0.83983364573799	0.024664247303472	-0.429274205480987	-0.419818433061931	1.0325	0.7075	5.58001211252942	5.69508748047331	3.83618798167063	3.76257354027423	1.41830129131975	1.27646180417324	0.903089986991944	0.924279286061882	0.963787827345555	0.863322860120456	2.55810830163055	2.94807048151894
BW12	0.9376409402766	0.039330935776804	-0.263648224707989	-0.260271754444383	0.9005	0.76	5.80685802951882	5.81537848496592	3.76482223455375	3.77436730907396	1.3096301674259	1.29225607135648	0.903089986991944	1.00860017176192	0.806179973983887	0.7481880270062	2.56074330105471	2.90520202866232
BW13	0.862360254969894	0.0251540374314292	-0.432439329834466	-0.429114791922975	0.92575	0.68	5.72737856945149	5.51679970408162	3.77945579168487	3.71435071939785	1.51851393987789	1.61066016308988	0.857332496431269	0.968482948553935	0.863322860120456	0.812913356642856	2.6959192528314	2.92017552201002
BW14	0.900158095575738	0.0292961001621943	-0.35674104519068	-0.35030142356174	0.97525	0.605	5.73399928653839	5.63588568528127	3.95930379870632	3.97467285378423	1.2380461031288	1.39093510710338	0.863322860120456	0.792391689498254	0.8750612633917	0.897627091290441	2.7701152947871	3.08170727009735
BW15	0.77516184587681	0.0222148649972503	-0.430784717459617	-0.423339647094525	0.95425	0.6925	5.87763046287419	5.7001843296222	3.85879877819506	3.77408976026637	1.32014628611105	1.19312459835446	0.732393759822969	0.707570176097936	0.785329835010767	0.7481880270062	2.22659990520736	2.4072208929274
BW16	0.841865598524057	0.0218332989050271	-0.467502928304299	-0.460120482077371	0.815625	0.505	5.57217431361306	5.52452593662638	1.54654266347813	1.16583762469013	0.681241237375587	0.681241237375587	0.690196080028514	0.662757831681574	0.732393759822969	0.724275869600789	1.64542226934909	1.8998205024271
BW17	0.879512398819897	0.0271891514875545	-0.407612073928413	-0.398398323263228	0.79250575	0.6425	5.77502760009884	5.74795530690673	3.68059383725557	3.47658529428173	1.41664050733828	1.51851393987789	0.799340549453582	0.770852011642144	0.832508912706236	0.826074802700826	2.54715912132742	2.9006947744524
BW18	0.832441661741168	0.0234853003546903	-0.494485870032993	-0.478421522976486	0.7265	0.6125	5.69552545396938	6.00964207926614	3.78283796581103	3.79502100246135	1.46389298898591	1.34044411484012	0.8750612633917	0.89209460269048	0.857332496431269	0.785329835010767	3.13376238478735	3.38044642086736
BW19	0.917669599704489	0.0293541068662946	-0.403225361023617	-0.400180354076019	0.75425	0.805	5.61087300038005	5.66940986728778	4.20041407000019	3.61906723041447	1.52244423350632	1.18184358794477	1.04532297878666	0.886490725172482	0.934498451243568	0.778151250383644	2.31048089146268	2.56572978783113
BW20	0.923104455491414	0.0456235827978374	-0.227372338473805	-0.221917658323484	0.74	0.83	5.81521236229935	5.65619406217919	3.5660719889377	3.63189001063862	1.13672056715641	1.12385164096709	0.792391689498254	0.792391689498254	0.939519252618618	0.792391689498254	2.21005084987514	2.45423489574827
BW21	0.888667829164604	0.0587334865992678	-0.135975415960105	-0.137420826248338	0.542605	0.5425	5.49185174972142	5.69578802621553	4.13643834256338	3.94646700326351	1.78604121024255	1.70842090013471	1.11394335230684	1.29225607135648	1.12710479836481	1.13672056715641	2.63356944255409	2.93196611472817
BW22	0.916663666241884	0.0403075057798748	-0.297657077483458	-0.291797114169912	0.74625	0.6125	5.95477298968972	5.93439744078099	3.90279945539984	3.91435638147601	1.41161970596323	1.38560627359831	0.886490725172482	0.897627091290441	0.857332496431269	0.812913356642856	2.50229052791477	2.79379038469082
BW23	0.914687926442608	0.0267762719828494	-0.453538244832684	-0.454976655991027	0.77025	0.64	5.95375969173323	5.65638571905869	3.79436603669014	3.78042173192414	1.30535136944662	1.26245108973043	0.880813592280791	0.944482672150169	0.851258348719075	0.832508912706236	2.67623621676331	2.96123119704466
BW24	0.90709282595816	0.0283495190832334	-0.432991414865569	-0.4414082223987	0.6989	0.4975	5.67029224957883	5.42748610909579	3.93752792179719	3.81386108821151	1.51851393987789	1.15836249209525	0.880813592280791	0.886490725172482	0.886490725172482	0.763427993562937	2.56050441519506	2.82164451754222
BWd01	0.864885262236682	0.0261591298160067	-0.406926445059446	-0.398515596884199	0.28675	0.28	4.70070371714502	5.01994668167884	3.55789801135056	3.75029235097287	1.56820172406699	1.32633586092875	0.838849090737255	0.959041392321094	0.799340549453582	0.934498451243568	2.26245108973043	2.5328817194074
BWd02	0.745005609076882	0.0222738121828295	-0.434226753190957	-0.424704692486917	0.2045	0.38425	4.68752896121463	5.01828430842653	3.59485643405016	3.87393933571855	2.05956341790127	1.88592633980143	1.49415459401844	1.59879050676312	0.724275869600789	0.770852011642144	1.91328390176042	2.4568213480216
BWd03	0.838040968655918	0.0308166092717795	-0.318568711728891	-0.311994466545869	0.23175	0.4	5.21192108430851	5.07003786660776	3.29380435991934	3.46990297858868	1.22010808804006	0.944482672150169	0.690196080028514	0.724275869600789	0.763427993562937	0.724275869600789	2.36021461329535	2.40260524191991
BWd04	0.648829881904209	0.0147136350242173	-0.518053016863024	-0.499825762489386	0.20175	0.4025	4.95712819767681	5.04000863601354	3.58141484791837	3.70436932552976	2.38039216005703	1.50105926221775	0.7481880270062	0.763427993562937	0.785329835010767	0.806179973983887	2.00302947055362	2.84874318189568
BWd05	0.791315762249435	0.0223865160180982	-0.482630009716248	-0.483924458029158	0.22125	0.4225	4.82380015374988	5.17304050755106	3.64609971173744	3.71797822720925	2.17955179116519	1.37106786227174	0.826074802700826	0.778151250383644	0.763427993562937	0.792391689498254	2.47899913167336	2.85089118413592
BWd06	0.319923668636011	0.00993248405705048	-0.520408047129055	-0.495989583872328	0.16325	0.3425	4.3324384599156	4.41246054742996	3.57012829431099	3.81496970903707	1.63245729218472	1.69983772586725	0.770852011642144	0.838849090737255	0.785329835010767	0.740362689494244	2.19975517725347	2.46044678388072
BWd07	0.869236530655744	0.02103886561318	-0.500652528945579	-0.498715712878303	0.1885	0.3825	5.02857125269254	5.23741805604624	3.73021279909742	3.83988324170991	2.38738982633873	1.5327543789925	0.986771734266245	1.01703333929878	0.799340549453582	0.792391689498254	2.32939787936104	2.9897167199481
HW01	0.879899516698554	0.0429324202404448	-0.248264704129035	-0.242122573895506	0.665375	0.57	5.6200839781727	5.64767631324087	4.22686916162377	4.01769263215631	1.51454775266029	1.42488163663107	1.12057393120585	1.08278537031645	0.963787827345555	0.838849090737255	2.30813737863804	2.63968566124268
HW02	0.896907398482858	0.0333089942799727	-0.328273578980459	-0.320936677205738	0.88625	0.965	5.87995558512275	6.08454053206148	3.94072561310803	3.971860082779	1.18752072083646	1.28555730900777	0.8750612633917	0.954242509439325	0.959041392321094	1.02530586526477	2.66105508485338	3.05457475529482
HW03	0.90978616928226	0.0406439168365703	-0.273734039365723	-0.271541888325121	0.94075	0.765	5.73247417728119	6.03478883125118	4.02880704148181	4.00660507980019	1.11058971029925	1.07554696139253	0.913813852383717	1.02938377768521	0.845098040014257	0.7481880270062	2.62096843564429	2.90325281689396
HW04	0.934580515148425	0.029034618824998	-0.410908232384707	-0.415132322781287	0.669625	0.5175	5.7580030092998	5.75250940078884	4.15441636452519	4.1201295391101	1.49554433754645	1.49692964807321	1.00432137378264	1.09691001300806	1	1.00432137378264	3.07132958686034	3.28562481067595
HW05	0.919132912373596	0.032583815324695	-0.354626489841285	-0.356137635199856	1.0017	0.685	5.58591171031943	5.39523900108155	3.98648285476646	3.80791368679289	1.41329976408125	1.35602585719312	0.929418925714293	0.886490725172482	0.90848501887865	0.8750612633917	2.73703353133388	3.1044871113124
HW06	0.911596465165514	0.0350239061125627	-0.326653554052314	-0.322859501460494	1.10075	0.7725	5.84642990018312	5.91349595961712	3.90947579501699	3.91954353214137	1.6232492903979	1.68484536164441	0.886490725172482	0.973127853599699	0.806179973983887	0.785329835010767	2.70217195085771	3.05926040412173
HW07	0.93670269344742	0.0455576963154632	-0.209366136989558	-0.213115944149747	0.9542	0.8375	5.92564722512057	5.82610721152752	3.95539186758855	3.99963938590446	1.6232492903979	1.67851837904011	0.886490725172482	1.01283722470517	0.851258348719075	0.812913356642856	2.55521540512607	3.06130165620604
HW08	0.855640420126227	0.0294949315869226	-0.352239280310322	-0.346402152760932	0.6691	0.5125	5.87852179550121	5.40027888956409	1.46164856806346	1.21748394421391	0.690196080028514	0.690196080028514	0.690196080028514	0.653212513775344	0.716003343634799	0.724275869600789	1.64640372622307	1.89872518158949
HW09	0.909618324535007	0.0389889109590871	-0.271538453252199	-0.262678010999171	0.8679	0.6075	5.59400560178834	5.71474876072506	3.77786524569618	3.66964224702574	1.15533603746506	1.26717172840301	0.716003343634799	0.716003343634799	0.832508912706236	0.770852011642144	1.9237619608287	2.14363923527454
HW10	0.922101843704892	0.0565295232067963	-0.165054338249429	-0.165057109373942	0.90885	0.725	5.76974646717945	6.03484895647086	3.71389356947681	4.07893145489869	0.778151250383644	0.763427993562937	0.698970004336019	0.653212513775344	0.724275869600789	0.740362689494244	1.75511226639507	2.12872228433843
HW11	0.801427530329583	0.0179248922043328	-0.474847742258358	-0.457445244473977	1.10725	0.8325	5.71554375060514	5.95187155712836	3.95677572969259	3.59326390857346	1.41830129131975	1.11394335230684	0.716003343634799	0.690196080028514	0.799340549453582	0.755874855672491	2.47070442972279	2.52646851246948
HW12	0.934082358771974	0.0394312026304798	-0.279273031197746	-0.275439542391839	1.03625	0.7925	5.65176244738011	5.77385955237669	4.08239037758172	3.80078235498367	2.02612451674545	2.17955179116519	0.755874855672491	0.698970004336019	0.869231719730976	0.968482948553935	3.01707509637606	3.36806363550624
HW13	0.913089864015843	0.0317646563828113	-0.383142843616602	-0.386806265465133	0.999	0.6525	5.80885214753512	5.87358214622674	3.82565975597766	3.73221276607919	1.44715803134222	1.38560627359831	0.886490725172482	0.977723605288848	0.863322860120456	0.886490725172482	2.64226661890267	2.87943996599522
HW14	0.887040950597257	0.0292048890486007	-0.386569285740235	-0.380972701124394	1.03125	0.94	5.74024422939025	5.80601029455922	4.08211546613877	3.89429944395518	1.67942789661212	1.51054501020661	0.939519252618618	0.963787827345555	0.944482672150169	0.929418925714293	2.64845759428252	2.91370791398048
HW15	0.914811196386205	0.0341413560905765	-0.330628661879763	-0.324421952742379	0.92575	0.725	5.66195458865302	5.75016112902172	3.89227273824749	3.76565738065775	1.30535136944662	1.08278537031645	0.845098040014257	0.732393759822969	0.838849090737255	0.812913356642856	2.45924166487808	2.6959192528314
HW16	0.841071403514104	0.0201579960189133	-0.491589217611119	-0.483284448057426	1.10475	0.7375	5.92355485806755	5.56743810335701	3.93715917514264	3.93941441026219	1.70243053644553	1.53402610605614	0.897627091290441	0.954242509439325	0.8750612633917	0.826074802700826	2.78031731214015	3.01076623351843
LW01	0.886833366239732	0.0250925455460452	-0.434755711804273	-0.431534739381415	0.3025	0.33425	5.09113915382575	4.97680833733807	0.860338006570994	3.47461685437768	0.785329835010767	1.1430148002541	0.672097857935718	0.755874855672491	0.724275869600789	0.755874855672491	1.72997428569956	2.72222246396973
LW02	0.464902308668965	0.00655550050400872	-0.525985563548278	-0.498031514596624	0.31575	0.4225	4.92272545799326	4.56407397897715	0.829303772831025	3.39663516698369	0.690196080028514	1.12057393120585	0.662757831681574	0.724275869600789	0.716003343634799	0.755874855672491	1.68033551341456	2.72427586960079
LW03	0.859206456439595	0.0228043907486531	-0.518914035028381	-0.515152592127399	0.3225	0.3325	5.01703333929878	4.79379038469082	2.71307032585564	3.25676583794165	0.959041392321094	1.13353890837022	0.763427993562937	0.740362689494244	0.755874855672491	0.799340549453582	2.44059426183983	2.26857797188284
LW04	0.837172363901452	0.0266615901020662	-0.398010674557087	-0.380503603857891	0.3825	0.4075	5.36940141369662	4.89125861690414	3.20425567848015	3.37712404234646	1.02118929906994	1.41497334797082	0.716003343634799	0.903089986991944	0.812913356642856	0.838849090737255	2.5009222391903	2.09342168516224
LW05	0.610032348467143	0.012020639060231	-0.557090563958062	-0.5240221869503	0.2925	0.29325	5.23729233756746	5.49713706405196	1.02325245963371	3.5839125618068	0.662757831681574	1.50650503240487	0.672097857935718	0.724275869600789	0.698970004336019	0.770852011642144	1.67209785793572	2.77166095934889
LW06	0.8939974738807	0.029699764940461	-0.398921614001034	-0.402134975619091	0.45	0.31025	5.1320995219165	5.26209496467406	0.903089986991944	3.35654211194876	0.812913356642856	1.20682587603185	0.707570176097936	0.724275869600789	0.732393759822969	0.792391689498254	1.89209460269048	2.60390183173167
LW07	0.770518389482545	0.0217208595201836	-0.533565028594046	-0.499971769623298	0.53175	0.4175	4.66086547800387	5.04941186087108	0.937016107464814	3.61679048632972	0.778151250383644	1.1846914308176	0.681241237375587	0.724275869600789	0.7481880270062	0.755874855672491	1.82930377283102	2.64305768375145
LW08	0.868335525996642	0.0187537597231979	-0.537155908287064	-0.530852564594761	0.44	0.4075	4.98900461569854	4.73719264270474	1.31910605930978	3.55081517149623	0.716003343634799	1.04139268515823	0.681241237375587	0.724275869600789	0.707570176097936	0.7481880270062	1.67577834167409	2.45040308615537
LW09	0.770281110931986	0.0253408553697434	-0.404677267814508	-0.401897450571353	0.365	0.38	5.18723861983148	4.83916368291465	2.85177796775508	3.41361824168699	1.11058971029925	1.10037054511756	0.959041392321094	0.763427993562937	0.819543935541869	0.792391689498254	1.72672720902657	2.40105572577184
LW10	0.884245784563631	0.028664303562188	-0.386176782055387	-0.38159563802723	0.385	0.2445	5.11075800887989	5.20897851727625	3.51687897177544	3.51477347399751	1.4345689040342	1.38381536598043	0.826074802700826	0.792391689498254	0.763427993562937	0.785329835010767	2.62900161928699	2.87168966568552
LW11	0.853803974283249	0.0202885914428574	-0.476284028271018	-0.469335392972241	0.4025	0.4525	4.78031731214015	4.65030752313194	3.46672678531723	3.53623007263326	0.977723605288848	1.04532297878666	0.672097857935718	0.716003343634799	0.724275869600789	0.778151250383644	2.64473392744719	2.77342072329061
LW12	0.913642404826112	0.0293540242505531	-0.396703732826726	-0.404132911496284	0.4025	0.4125	5.21338492491639	5.15700319683252	2.46797787527979	3.52051628372922	0.845098040014257	1.13033376849501	0.690196080028514	0.716003343634799	0.740362689494244	0.763427993562937	1.97127584873811	2.60530504614111
OWW01	0.904513161933448	0.026564806976367	-0.413524728245227	-0.413793834506584	0.39425	0.2525	5.03140846425162	5.29939833006815	3.77155808601293	3.87089235811132	2.28780172993023	1.29446622616159	0.7481880270062	0.838849090737255	0.785329835010767	0.770852011642144	2.502836638621	2.91740046795525
OWW02	0.857268284567527	0.0250880128373672	-0.432858823942893	-0.429845993371428	0.271	0.385	5.91905192926983	4.95975667299099	3.6791461498237	3.76564993109719	1.78390357927273	1.15228834438306	0.740362689494244	0.785329835010767	0.770852011642144	0.763427993562937	1.92582757462474	2.42357351973274
OWW03	0.826523721012844	0.0250093056004746	-0.398048619109158	-0.384508484711293	0.232	0.3275	4.99277436425536	5.04708007281626	3.71225394305379	3.88463112768365	2.28891960566173	1.56584781867352	0.869231719730976	1.07188200730613	0.959041392321094	0.869231719730976	2.33162971762993	2.90145832139611
OWW04	0.799587827226602	0.0266683379130511	-0.451566543144488	-0.456651966829603	0.25525	0.415	4.75625564875423	5.11243741732184	3.59264301260386	3.73304872865637	2.01367969729119	1.31175386105575	0.826074802700826	0.819543935541869	0.763427993562937	0.832508912706236	2.24551266781415	2.74311762521474
OWW05	0.894449491943678	0.0203505385967792	-0.555280283420595	-0.556580273012787	0.28875	0.45	4.83058866868514	4.83154985199576	3.5738748935652	3.87247677454412	2.2792105126014	1.60314437262018	0.778151250383644	1.04532297878666	0.763427993562937	0.806179973983887	2.18155777386279	2.81431420020746
OWW06	0.856701247037132	0.0241002449532614	-0.47959317104594	-0.49621225360065	0.41725	0.498	5.09219412069732	5.25935492730803	3.59685539652747	3.89927044900833	1.39967372148104	1.32428245529769	0.812913356642856	0.832508912706236	0.792391689498254	0.863322860120456	2.18127177155946	2.56454771175595
OWW07	0.814765513451456	0.0178540230008927	-0.551933030176098	-0.547567163786062	0.50875	0.55	5.22698634552522	5.48408619935794	3.77461914064536	3.74822292426782	2.12678057701201	1.28330122870355	0.963787827345555	0.913813852383717	0.838849090737255	0.939519252618618	2.22993768590793	2.71349054309394
OWW08	0.90410490845224	0.0227121603994895	-0.520772634851334	-0.523313580649324	0.35625	0.4875	4.87794695162919	5.30513631894364	3.45540070585296	3.69422337841284	2.24204423936955	1.28555730900777	0.672097857935718	0.707570176097936	0.707570176097936	0.770852011642144	1.95520653754194	2.79246173134695
OWW09	0.859015591122269	0.0301159498936024	-0.379608662276708	-0.382073588510835	0.57475	0.4425	5.12434117077496	5.20098721916317	3.61194093163627	3.83941833563447	1.78816837114117	1.24797326636181	0.812913356642856	0.832508912706236	0.724275869600789	0.763427993562937	2.31344537042641	2.60745502321467
OWW10	0.667177903092011	0.0154547531810735	-0.492332428400599	-0.478925155862201	0.48075	0.615	5.25418540946209	5.35583449588494	3.72075036873288	3.78948552355968	2.11461098423217	1.33243845991561	0.755874855672491	0.778151250383644	0.770852011642144	0.785329835010767	2.03742649794062	2.55690526905545
OWW11	0.814599437680426	0.0215196746157119	-0.447257521641467	-0.438365021276008	0.2195	0.358	5.03502928220237	4.75358305889291	3.57252309784964	3.76468413163581	1.66086547800387	1.33445375115093	0.763427993562937	0.755874855672491	0.740362689494244	0.863322860120456	2.11293997608408	2.45301239112146
OWW12	0.75182539522074	0.0325810837989872	-0.292594089784114	-0.293368151170472	0.1595	0.3415	4.16879202031418	4.66604973848052	3.57270319334939	3.91810900619582	1.78958071216443	1.28780172993023	0.832508912706236	0.851258348719075	0.806179973983887	0.7481880270062	2.17289469775218	2.5952757118021
OWW13	0.810738916121263	0.0257030013088784	-0.393320825517906	-0.384910029686455	0.25225	0.4475	5.29258831246556	5.5181848042184	3.80078235498367	3.86491137299488	2.4367985102318	1.35218251811136	0.812913356642856	0.963787827345555	0.838849090737255	0.857332496431269	2.26458172923808	3.02481393262931
OWW14	0.541058831266443	0.00505443054542019	-1.01551600897893	-0.974643248845661	0.1305	0.29	4.9554472105777	5.160318437984	3.62445227291601	3.81210080036997	2.08742645703629	1.8109042806687	1.23552844690755	1.44715803134222	1.17026171539496	0.799340549453582	2.22530928172586	2.60659630917928
OWW15	0.760356440745145	0.0152722989636638	-0.586449878338384	-0.570487158928157	0.216	0.3725	5.10174707394637	5.34192888374581	3.61946899986417	3.6521641171156	1.94200805302231	1.54282542695918	1.00860017176192	1.26245108973043	0.806179973983887	0.897627091290441	2.08529057823006	2.72361983551546
OWW16	0.833587659517061	0.0288260385631261	-0.377356679271174	-0.371532700956204	0.2225	0.52	4.80208925788173	5.22141423784234	3.67023193315611	3.71190419659457	2.20030318298158	1.29225607135648	0.770852011642144	0.7481880270062	0.785329835010767	0.819543935541869	2.49803472368703	2.84279639517558
PH01	0.775284245839482	0.0230970452972932	-0.500080635026673	-0.469857406269503	0.22625	0.45575	3.46239799789896	5.0782755220866	3.40961193084644	3.4547153142649	0.8750612633917	0.755874855672491	0.785329835010767	0.732393759822969	0.732393759822969	0.763427993562937	2.36172783601759	2.42422807069598
PH02	0.872898523290119	0.0291020732626497	-0.369271128920397	-0.372010376913713	0.15625	0.4325	3.46982201597816	4.78816837114117	3.94731851563357	4.06731082396165	0.770852011642144	0.897627091290441	0.716003343634799	0.740362689494244	0.732393759822969	0.755874855672491	2.88974977526404	3.0134271270707
PH03	0.655641129480659	0.0179819192936251	-0.472985282545387	-0.460342189682118	0.146	0.4625	3.38916608436453	4.83282812953935	3.11667414479595	3.15633710087081	0.838849090737255	0.740362689494244	0.857332496431269	0.806179973983887	0.732393759822969	0.7481880270062	2.24452451157008	2.21722065564452
PH04	0.79934544855721	0.0340035085644742	-0.241440034006866	-0.247946540505562	0.26875	0.30275	3.63848925695464	4.86835049964797	0.913813852383717	3.38292612659863	0.716003343634799	1.32428245529769	0.716003343634799	0.763427993562937	0.732393759822969	0.851258348719075	2.06929801211553	2.64008373137312
PH05	0.780605256573578	0.0348516690307989	-0.212645829098546	-0.219568425901144	0.26775	0.34225	3.79588001734408	4.98565097369095	1.04921802267018	3.52358390102943	0.672097857935718	1.21218760440396	0.662757831681574	0.806179973983887	0.716003343634799	0.755874855672491	1.66181268553726	2.63103769653674
PH06	0.898598815684881	0.0290087642273335	-0.403853445583597	-0.409571882387324	0.203	0.35375	3.49136169383427	5.10653085382238	1.97266559226611	3.53477468201477	0.681241237375587	1.1846914308176	0.662757831681574	0.716003343634799	0.732393759822969	0.755874855672491	1.65801139665711	2.64305768375145
PH07	0.956164515262101	0.0442827821928405	-0.233368628068357	-0.238563806125403	0.1455	0.294	3.39794000867204	5.11344195396532	1.31910605930978	3.5855791573096	0.778151250383644	1.19033169817029	0.732393759822969	0.732393759822969	0.7481880270062	0.740362689494244	2.3727279408856	2.58838376837873
PH08	0.317838102211043	0.0112249045030229	-0.0793331329678077	-0.0945732354303612	0.13425	0.31825	3.4983105537896	4.94324712513786	3.91586132464823	3.86679224517467	0.838849090737255	1.17897694729317	0.826074802700826	0.799340549453582	0.724275869600789	0.792391689498254	3.02820511990544	3.24385623280651
PH09	0.542587485221232	0.00539127435556522	-0.066524469019417	-0.0825317622293916	0.13025	0.4405	3.37106786227174	5.11743702528262	1.08635983067475	3.50342975557373	0.903089986991944	1.52244423350632	0.672097857935718	0.724275869600789	0.732393759822969	0.838849090737255	1.7481880270062	2.58353881925435
PH10	0.213795872435706	0.00539999552257474	-0.0574412407871675	-0.0731255245685092	0.15075	0.34775	3.41497334797082	4.83410265571279	0.968482948553935	3.54403702220791	1.2405492482826	1.26245108973043	0.740362689494244	0.724275869600789	0.755874855672491	0.763427993562937	1.71516735784846	2.67394199863409
PH11	0.931033805007389	0.0427480482349252	-0.212895525152343	-0.221022880469023	0.1855	0.32	3.46982201597816	4.95568775031351	2.01494034979294	3.56486127538507	0.716003343634799	1.3384564936046	0.707570176097936	0.732393759822969	0.724275869600789	0.785329835010767	2.16583762469013	2.63144376901317
PH12	0.255379687448941	0.00673270049521464	-0.0682332192264446	-0.0837011620519319	0.15075	0.3375	3.55022835305509	5.13529170447575	0.869231719730976	3.62340953617507	0.740362689494244	1.17897694729317	0.662757831681574	0.740362689494244	0.690196080028514	0.755874855672491	1.67851837904011	2.67942789661212
PH13	0.891016187491348	0.0364734374652013	-0.281469203791995	-0.288727248214719	0.14175	0.3035	3.36172783601759	5.22180531799655	3.43870053290074	3.67246269681819	0.982271233039568	0.929418925714293	0.755874855672491	0.880813592280791	0.982271233039568	1.00860017176192	2.59383966108127	2.45224657452044
PH14	0.918406222825342	0.04163693473734	-0.26629573753298	-0.268863895607289	0.13525	0.33075	3.51188336097887	4.98452731334379	3.18916735029849	3.36435397045035	0.819543935541869	0.826074802700826	0.724275869600789	0.716003343634799	0.716003343634799	0.7481880270062	2.58804749698608	2.44653716707364
PH15	0.583947179005014	0.0150407013344626	-0.0577816253488042	-0.0726661891608079	0.125	0.30225	3.69460519893357	5.06576638762275	2.8742498227784	3.54345339311997	0.799340549453582	1.07554696139253	0.681241237375587	0.806179973983887	0.732393759822969	0.7481880270062	2.33805787541976	2.37309598707873
PH16	0.950124105224938	0.0538418640278921	-0.15574081620928	-0.162308448748726	0.1095	0.302	3.39794000867204	4.9731278535997	0.897627091290441	3.45151011793432	0.886490725172482	1.30535136944662	0.7481880270062	0.724275869600789	0.724275869600789	0.792391689498254	1.99475694458763	2.67513650446799
PH17	0.475832510400984	0.0234357979933915	-0.0790798330546755	-0.0932941641538359	0.09525	0.2425	3.19033169817029	5.34537373055909	2.44591541395112	3.47378612874875	0.903089986991944	1.43296929087441	0.732393759822969	0.755874855672491	0.732393759822969	0.89209460269048	2.34733001531695	2.47173165148005
PH18	0.253816483171022	0.0110865271417861	-0.0760998783441764	-0.091679376993625	0.101	0.25875	3.38916608436453	5.17724783625562	2.41035538343447	3.60131018645389	0.672097857935718	1.11058971029925	0.643452676486187	0.792391689498254	0.716003343634799	0.7481880270062	1.66745295288995	2.610127613076
PH19	0.42688266497502	0.0157809437601463	-0.0894207386840428	-0.106069567060004	0.1025	0.276	3.38021124171161	4.93399316383124	0.993436230497612	3.47683887152194	0.681241237375587	1.03342375548695	0.690196080028514	0.799340549453582	0.724275869600789	0.7481880270062	1.69108149212297	2.52943035436699
PH20	0.147994824159235	0.00431815679473701	-0.0640030252628545	-0.080088234762694	0.1025	0.17725	3.62838893005031	5.26564314194214	3.61819458098714	3.64051621888848	1.6570558528571	1.74429298312268	1.63648789635337	1.71432975974523	0.740362689494244	0.799340549453582	2.65059889817266	2.7388598020722
PH21	0.923761596742944	0.0452919433127261	-0.218630324845764	-0.224718315570523	0.098	0.15525	3.40654018043396	5.36144450808633	1.00432137378264	3.4895436636733	0.740362689494244	1.64345267648619	0.681241237375587	0.755874855672491	0.707570176097936	0.863322860120456	2.07918124604762	2.63427569462594
PH22	0.220049076581061	0.00798520714784193	-0.0627083235239008	-0.0783182853234048	0.1155	0.15925	3.55630250076729	5.27392678010053	2.91410504981628	3.61314914597021	0.681241237375587	1.05307844348342	0.707570176097936	0.716003343634799	0.732393759822969	0.763427993562937	1.68752896121463	2.58523506336578
PH24	0.181509583807432	0.00823255504223777	-0.0656949884286731	-0.0814377097842455	0.08325	0.148	3.43136376415899	5.0006509536296	2.75097098443732	3.56528097785095	0.681241237375587	1.06069784035361	0.662757831681574	0.763427993562937	0.7481880270062	0.755874855672491	1.68033551341456	2.58444430716518
SAC02	0.533289312775186	0.0117905853294164	-0.0822628068712612	-0.0976197117070664	0.163	0.25	3.21748394421391	4.12872228433843	3.22340507487107	3.33399106156951	0.89209460269048	1.08278537031645	0.806179973983887	0.806179973983887	0.732393759822969	0.826074802700826	2.47798897625089	2.56655533088305
SAC03	0.933160100897594	0.167913310260575	0.330011341897248	0.328284171690667	0.2045	0.2135	3.14612803567824	4.39707054995941	2.98018523694734	3.3052223519237	0.672097857935718	0.792391689498254	0.690196080028514	0.716003343634799	0.732393759822969	0.812913356642856	1.52633927738984	2.47567118832443
SAC04	0.92673615500093	0.0392233813255286	-0.274868351097213	-0.277828062994361	0.2275	0.2825	3.17609125905568	3.96614173273903	2.99624891456913	3.33256973840392	0.740362689494244	0.806179973983887	0.740362689494244	0.778151250383644	0.716003343634799	0.819543935541869	1.60530504614111	1.91855453055027
SAC05	0.938249554403297	0.0468847867748227	-0.218071401996687	-0.220167739065337	0.17475	0.187	3.17609125905568	3.38021124171161	3.50400845640105	3.84927503449173	1.30749603791321	1.42975228000241	1.02118929906994	1.07554696139253	0.799340549453582	0.90848501887865	2.64933485871214	2.9982593384237
SAC06	0.158370579890159	0.00821186997731579	-0.0677342684484937	-0.0830262818510877	0.17525	0.235	3.34242268082221	3.56820172406699	3.57567269036331	3.95175266905718	0.819543935541869	1.07188200730613	0.707570176097936	0.785329835010767	0.7481880270062	0.792391689498254	2.31344537042641	2.86729066985488
SAC07	0.295662888650111	0.0125914527524091	-0.102617863355288	-0.117622071404696	0.14525	0.15	3.52504480703685	3.70329137811866	3.91989620188749	4.05840134793313	1.28330122870355	1.44715803134222	0.707570176097936	0.716003343634799	0.770852011642144	0.886490725172482	2.62510657540347	3.06546767246565
SAC08	0.829794313023178	0.0242986774342904	-0.499221909392109	-0.495816654774171	0.191	0.275	4.10209052551184	4.84911216618458	2.91450182282731	3.40773922020928	0.986771734266245	0.89209460269048	0.806179973983887	0.755874855672491	0.724275869600789	0.799340549453582	2.83840827849419	2.92458938566942
SAC09	0.859142200866752	0.0297324436315234	-0.381521227477944	-0.385885267425232	0.076375	0.102	3.23044892137827	3.79934054945358	3.54436574422386	3.51047798428135	1.2405492482826	1.37291200297011	0.89209460269048	0.919078092376074	0.838849090737255	0.968482948553935	2.4437322414016	2.70748501196747
SAC10	0.467301288232853	0.0113297467429872	-0.0886866145377682	-0.104236825568321	0.13425	0.1675	4.45712462630341	3.65321251377534	3.50507532754034	3.81100160005739	1.12710479836481	1.36735592102602	0.707570176097936	0.740362689494244	0.724275869600789	0.863322860120456	2.37456506072277	2.61930207587561
SAC11	0.929378364325395	0.0403897201123098	-0.27817451121585	-0.28141830416887	0.21	0.16575	3.09691001300806	3.90848501887865	3.33342712115296	3.6832542247664	1.01703333929878	1.40993312333129	0.857332496431269	0.826074802700826	0.724275869600789	0.838849090737255	2.36210531929377	2.64226661890267
SAC12	0.177908542615047	0.00761496130055219	-0.0712194995439616	-0.0869153465945132	0.182	0.21025	4.16435285578444	3.30102999566398	2.94126290931895	3.49648682929215	0.903089986991944	2.12287092286444	0.7481880270062	1.53529412004277	0.792391689498254	0.8750612633917	2.15198239545747	2.65388755807098
SAC13	0.350032264081057	0.0158870899624612	-0.103530217616356	-0.118177209431466	0.15075	0.1885	3.25527250510331	3.76342799356294	3.20784971113053	3.14639163445786	1.34830486304816	1.66838591669	0.7481880270062	0.755874855672491	0.724275869600789	0.832508912706236	2.23146959043068	2.38524868240322
SAC14	0.815357888357967	0.0327226089556728	-0.258635956765092	-0.270410307117769	0.18125	0.1905	3.73239375982297	3.73639650227664	2.83619748077893	3.01888765423126	0.740362689494244	0.944482672150169	0.698970004336019	0.7481880270062	0.732393759822969	0.812913356642856	2.13321945673249	2.57077636879475
SAC15	0.494971587855586	0.00814883653503013	-0.0742109776304055	-0.0898936373972888	0.12675	0.16275	4.30749603791321	4.16435285578444	3.32396330656902	3.43026054292435	0.832508912706236	0.968482948553935	0.778151250383644	0.785329835010767	0.7481880270062	0.826074802700826	2.45024910831936	2.1296898921993
SAC16	0.635533453270966	0.0315148090294681	-0.153341180869329	-0.164876652297515	0.1835	0.2265	3.65801139665711	4.28668096935493	3.93607118008931	3.28973384182742	0.90848501887865	1.43933269383026	0.939519252618618	1.41497334797082	0.724275869600789	1.24797326636181	1.85491302230786	2.263399331334
SNG01	0.858962328646319	0.027456898069416	-0.440382090221704	-0.438122093138746	0.30308592325	0.376817677	5.31952244906545	5.29567703401746	2.95609636235861	3.52536230930185	1.13033376849501	1.51321760006794	0.690196080028514	0.716003343634799	0.806179973983887	1.00860017176192	2.26623169668989	2.50460677064195
SNG02	0.935666262993312	0.0460711220456069	-0.164231905467174	-0.174811577614084	0.32203219725	0.344942993	5.23842249588548	5.45621415535799	3.59480675592128	3.68159395836863	1.86981820797933	1.52891670027765	0.690196080028514	0.716003343634799	0.863322860120456	0.886490725172482	2.64196959770206	2.73455982157948
SP10	0.823220335244118	0.0279606860156534	-0.42975149080926	-0.427408811235867	0.31176303875	0.35121793725	5.25935492730803	5.35850591149024	4.09730590907437	3.92743196072467	1.26951294421792	1.17609125905568	0.919078092376074	0.903089986991944	0.944482672150169	0.939519252618618	2.39199307225971	2.73383900069715
SP11	0.824131641549734	0.0331177747521117	-0.392685541762902	-0.386563602414963	0.3902731525	0.55658263475	5.6063813651106	5.65953590715422	3.98672695933122	3.72593204039082	1.64345267648619	1.56584781867352	0.799340549453582	0.8750612633917	0.973127853599699	1.0899051114394	2.16996817399689	2.38898878512471
SP12	0.462083231485993	0.0110237615091294	-0.856499239407015	-0.767137962491865	0.30780103775	0.44097646	5.57553421831986	5.3379581636797	3.62755530696129	3.55485243437205	1.40483371661994	1.60314437262018	0.851258348719075	0.826074802700826	0.929418925714293	0.886490725172482	2.05499586152914	2.66773305253327
SP13	0.868687508422991	0.0203573134294736	-0.552678756373953	-0.527123019193668	0.30600954325	0.50562731725	5.25466889905492	5.37930551775058	3.7292863103246	3.86455557616441	1.01703333929878	1.55509444857832	0.698970004336019	0.826074802700826	0.869231719730976	0.863322860120456	2.58961454063127	3.12447161891949
SP14	0.670998590759348	0.0186180165811544	-0.572929922398202	-0.549823012612761	0.29428861775	0.4581968455	5.59654211816175	5.53307266004881	3.37318794991272	3.59346883108305	1.40312052117582	1.3654879848909	0.819543935541869	0.792391689498254	0.886490725172482	0.869231719730976	2.23223352111473	2.59417147911491
SP15	0.83669823639359	0.0208105584090791	-0.582557900230416	-0.545574211773486	0.3060777535	0.49260701975	5.53643217582201	5.48101242095657	3.79652923639414	4.04584108420281	1.34242268082221	1.28103336724773	0.863322860120456	1.07188200730613	1.02530586526477	1.01703333929878	3.12946430978238	3.46435539321083
SP16	0.407984846356746	0.0168920998771779	-0.116904406402038	-0.133291601788763	0.204359991	0.37069912325	6.16473938429143	6.1889565925264	3.36716016480897	3.63314513936744	1.30319605742049	1.79518458968242	0.792391689498254	0.755874855672491	0.826074802700826	1.00860017176192	2.37051308959859	2.87765924411161
SP17	0.785139867804851	0.0184282975663379	-0.585834706423139	-0.57121615603398	0.2085605935	0.411051695	5.83944662116615	5.97618943923046	4.14790654747131	4.03719335071716	1.46089784275655	1.34635297445064	0.724275869600789	1.02118929906994	0.959041392321094	1.02938377768521	2.61741974673718	2.91692746611299
WEL01	0.745515879903074	0.0410749318001577	-0.0247084595731738	-0.0389347602493698	0.13075	0.36225	3.36172783601759	5.08671566394488	3.6171419358019	3.65594957692719	0.986771734266245	1.02530586526477	0.857332496431269	0.716003343634799	0.732393759822969	0.763427993562937	2.11727129565576	2.18949031369937
WEL02	0.689391963394937	0.0317102710852792	-0.104866853459109	-0.119842054850772	0.2625	0.31725	4.91829251275536	4.49762064978129	1.11394335230684	3.45283637284396	0.778151250383644	1.36172783601759	0.681241237375587	0.799340549453582	0.732393759822969	0.763427993562937	2.28080592839367	2.70500795933334
WEL03	0.363659881435436	0.0159280710082394	-0.101506792021575	-0.116737446138883	0.15975	0.371	3.20411998265592	4.8677620246502	3.89975212574713	3.36599311993444	2.5632437011404	1.27646180417324	0.812913356642856	0.785329835010767	1.46686762035411	0.763427993562937	2.92241402414563	2.62169546232928
WEL04	0.891812492995982	0.0353369445759107	-0.328027445587622	-0.320916714960214	0.17825	0.375	3.23044892137827	5.11193427633268	1.93976877545335	3.38920153552833	1.16136800223497	1.24551266781415	0.778151250383644	0.785329835010767	0.755874855672491	0.770852011642144	1.78958071216443	2.6534054906645
WEL05	0.874762177945675	0.0355296036602017	-0.296140611770888	-0.301357067692843	0.16225	0.3595	3.32221929473392	4.96260607292413	3.38856297139807	3.4824161907472	0.857332496431269	0.812913356642856	0.707570176097936	0.690196080028514	0.740362689494244	0.740362689494244	2.47552591503928	2.56525734342021
WEL06	0.891618306337627	0.0322253213371227	-0.357806667995888	-0.36291107278792	0.14875	0.3305	3.31175386105575	4.99277436425536	3.27903922706105	3.40533782107324	0.919078092376074	0.913813852383717	0.838849090737255	0.716003343634799	0.740362689494244	0.740362689494244	2.30276370847298	2.50119624202709
WEL07	0.892502998918437	0.031176341518892	-0.355080952279485	-0.362060207156549	0.17075	0.286	3.37106786227174	4.98632377705077	3.5738748935652	3.86201801843211	0.89209460269048	0.934498451243568	0.851258348719075	0.838849090737255	0.7481880270062	0.851258348719075	2.33585891131982	2.88411536201167
WEL08	0.179543972531859	0.00885493511004232	-0.0700780667611311	-0.0855818227356531	0.1575	0.37825	3.26717172840301	5.07040732174012	2.59742092353439	3.32330367602614	1.15533603746506	1.32837960343874	0.913813852383717	0.7481880270062	0.740362689494244	0.832508912706236	2.32654066851656	2.56714404519566
WEL09	0.943970645519246	0.0413537704232367	-0.218894859923945	-0.228121653755506	0.10775	0.36525	3.38916608436453	4.98497712641549	1.15986784709257	3.62359038779153	0.903089986991944	1.16435285578444	0.732393759822969	0.732393759822969	0.7481880270062	0.7481880270062	2.14238946611884	2.72189301621496
WEL10	0.907136833612321	0.047560071499084	-0.140489987915743	-0.149158708437307	0.13875	0.4825	3.40654018043396	5.2137832993353	4.13722272691473	3.73071769175938	0.690196080028514	1.02938377768521	0.672097857935718	0.698970004336019	0.724275869600789	0.755874855672491	1.72345567203519	2.71683772329952
WEL11	0.302992670221678	0.0140953238198265	-0.0860182091876181	-0.10126276933549	0.1465	0.41	3.24303804868629	5.02591999850202	1.16435285578444	3.50242029140116	0.755874855672491	1.22530928172586	0.681241237375587	0.716003343634799	0.740362689494244	0.740362689494244	1.96094619573383	2.71206014246107
WEL12	0.190868903519306	0.00432454796795202	-0.0632820315158767	-0.0792398922227125	0.17	0.26025	4.99365662861546	5.266349311987	3.20704162093539	3.42830491339415	0.880813592280791	0.959041392321094	0.716003343634799	0.763427993562937	0.732393759822969	0.755874855672491	2.4184670209466	2.47957531017499
WEL13	0.329713766424978	0.0149224729688728	-0.0820337508017436	-0.0967083611538916	0.1995	0.3025	4.98272338766855	4.94299959336604	3.64591327503384	3.70159388653891	1.42160392686983	1.48713837547719	1.0899051114394	0.897627091290441	0.806179973983887	0.863322860120456	2.42537116643894	2.64845759428252
WEL14	0.813121031338189	0.0354857797329204	-0.318436647793269	-0.336319764070928	0.176	0.35	3.46982201597816	5.14410697304932	2.58410497039945	3.40234737284837	2.2973227142053	1.26481782300954	0.7481880270062	0.755874855672491	0.724275869600789	0.778151250383644	1.71180722904119	2.64087877870162
WEL15	0.278760868648754	0.0134370480433217	-0.0851743515459698	-0.100249241765531	0.138	0.339	3.56229286445647	5.241421951712	1.87128097285797	3.59238219340052	0.690196080028514	1.26245108973043	0.662757831681574	0.939519252618618	0.724275869600789	0.7481880270062	1.68124123737559	2.70354929823823
WEL16	0.69835001822721	0.0283143357712842	-0.222385061940363	-0.237436831337188	0.12925	0.32675	3.29003461136252	5.01515010322947	1.8701111553644	3.55525168552223	0.672097857935718	1.13353890837022	0.672097857935718	0.732393759822969	0.724275869600789	0.763427993562937	1.68663626926229	2.62592949271629
WEL17	0.938478141636142	0.041354587365042	-0.186756890625158	-0.197779969074326	0.1125	0.37075	3.25527250510331	5.22775819611091	3.74113189357344	3.72463626638515	1.28330122870355	1.39619934709574	1.22788670461367	1.37657695705651	0.740362689494244	0.778151250383644	2.80099186126017	2.929725378378
WEL18	0.233738076379481	0.011351746787564	-0.0800927991908094	-0.0951205585834736	0.20225	0.33675	4.13513265137678	4.60530504614111	1.48784512011144	3.49526674438781	0.869231719730976	1.65030752313194	0.845098040014257	1.82607480270083	0.724275869600789	0.838849090737255	1.72181061521255	2.70731463358871
WEL19	0.778873812120658	0.0265045812689473	-0.380129556982829	-0.405696698703164	0.1525	0.35025	3.35218251811136	5.13481437032046	3.36511343162758	3.58009206470063	1.10720996964787	1.26007138798507	0.690196080028514	0.732393759822969	0.740362689494244	0.778151250383644	1.9106244048892	2.17464119266045
WEL20	0.324052674998381	0.0136913687647649	-0.0807154303150679	-0.0956474449393463	0.14875	0.3415	3.46239799789896	5.29170177072998	0.975431808509263	3.18581120376029	0.681241237375587	1.00432137378264	0.681241237375587	0.716003343634799	0.724275869600789	0.763427993562937	1.67209785793572	2.44963265047007
WEL22	0.57541593281675	0.0261194755292419	-0.151409357536112	-0.163365871835654	0.14675	0.35025	3.77451696572855	5.32551566336315	4.18361714036817	3.85763097129859	0.690196080028514	1.47275644931721	0.662757831681574	1.3747483460101	0.724275869600789	0.792391689498254	1.67117284271508	2.59206567043225
WEL23	0.892306561604076	0.061266910520641	-0.0994447529601713	-0.103704373744803	0.137	0.3005	3.44715803134222	5.32746110930314	1.83505610172012	3.48788748823809	0.7481880270062	1.32014628611105	0.716003343634799	0.732393759822969	0.7481880270062	0.785329835010767	2.02489596010748	2.51904003864834
WEL24	0.959679757785467	0.0557157655262012	-0.139747944741876	-0.145303378611959	0.12275	0.316	3.34242268082221	5.15866398081399	3.4657842395685	3.50147007210041	1.21218760440396	1.26007138798507	0.959041392321094	0.991226075692495	0.880813592280791	0.903089986991944	2.73551905881517	3.02147873225753
WEL25	0.517173114475804	0.0101675475787945	-0.0650977818102986	-0.0805444184833649	0.23025	0.455	4.17172645365323	4.98788960999775	3.11948683556464	3.25749858129809	0.939519252618618	0.792391689498254	0.785329835010767	0.724275869600789	0.7481880270062	0.755874855672491	2.10002573010786	2.44310645673727
WEL26	0.69264517833127	0.0310643886713927	-0.150206727154941	-0.165301953855496	0.1955	0.346	4.99321572047414	5.53421654433233	2.65829765030819	3.37634880129508	0.880813592280791	1.28555730900777	1	0.806179973983887	0.755874855672491	0.792391689498254	1.72997428569956	2.45969397647797
WF01	0.894929398909743	0.0290485410234139	-0.396508177543171	-0.395890130800784	0.192	0.265	4.31806333496276	4.80719666071095	3.87953740762628	3.82076285409613	2.15624619039734	1.18184358794477	0.778151250383644	0.716003343634799	0.763427993562937	0.770852011642144	2.18780263871842	2.82975391892497
WF02	0.778654623430635	0.0268581091220519	-0.336588953576141	-0.325794559369078	0.33725	0.465	4.68797462003456	5.12856080655932	3.94458136422693	3.71876318328517	1.57170883180869	1.19589965240923	0.763427993562937	0.740362689494244	0.740362689494244	0.740362689494244	2.08600370561838	2.41094585868777
WF04	0.896866330427389	0.0267823977220601	-0.426717094898002	-0.428546043015724	0.23075	0.42	4.583765368285	4.9576072870601	3.6480866610305	3.56935049688252	2.10619089726342	1.65801139665711	1.51321760006794	1.41830129131975	0.90848501887865	0.929418925714293	2.1156105116743	2.52126887559839
WF05	0.893916038320653	0.0306320295559159	-0.373962687189687	-0.373227419846714	0.19775	0.375	5.23108712058482	5.05211655055	3.68857108676739	3.56352854667875	1.42160392686983	1.26245108973043	0.806179973983887	0.755874855672491	0.812913356642856	0.819543935541869	1.94200805302231	2.13640344813399
WF06	0.882810639634166	0.0422803409749981	-0.247750553785866	-0.247465998509716	0.21075	0.365	4.90118578013715	5.01431048096331	3.3183242508504	3.53514848669057	1.3654879848909	1.17609125905568	0.716003343634799	0.732393759822969	0.681241237375587	0.724275869600789	2.39216914948974	2.49037992000318
WF07	0.870830554849297	0.0261579807139142	-0.415646013449732	-0.408731569344613	0.1976175	0.3475	4.96661098668193	5.00302947055362	3.96377838605854	3.77155073698497	2.10243370568134	1.69897000433602	1.07918124604762	1.14612803567824	0.880813592280791	0.944482672150169	2.56264967221192	2.70113606609253
WGP01	0.723972639259584	0.0293106299821407	-0.321106711859884	-0.317620897173184	0.0367	0.175	5.04139268515823	5.88118486960355	3.73059253310204	3.68661839669364	2.37291200297011	0.806179973983887	0.724275869600789	0.698970004336019	0.724275869600789	0.724275869600789	2.88941376404271	2.75457765604473
WGP02	0.838140254055384	0.0420142238607981	-0.198382853725199	-0.205386082846934	0.058275	0.24225	4.5971464878337	5.33324569896196	1.22530928172586	3.69279406074842	1.13672056715641	0.986771734266245	0.707570176097936	0.716003343634799	0.707570176097936	0.740362689494244	1.51587384371168	2.42667388802137
WGP03	0.194825323160734	0.00758176086048201	-0.0743023962014161	-0.0901111212728654	0.03350000085	0.26025	3.61278385671974	5.09881671704894	3.3654879848909	3.74544956032262	1.8394780473742	0.977723605288848	0.724275869600789	0.763427993562937	0.716003343634799	0.732393759822969	1.67117284271508	2.59150980899465
WGP04	0.706338938091955	0.0190415254185801	-0.53186022016027	-0.544079158590599	0.068225	0.2215	4.83026780093364	5.64923747234961	1.14144977340047	3.28994551617667	1.13987908640124	1.68484536164441	0.707570176097936	0.812913356642856	0.681241237375587	0.903089986991944	1.50514997831991	2.33223641549144
WGP05	0.376640318014008	0.0142479504952593	-0.20397196716505	-0.222606334181632	0.060575	0.2375	5.52530400995824	5.92114001301778	3.24029958200271	3.72682497539067	1.14612803567824	1.13987908640124	0.770852011642144	0.792391689498254	0.707570176097936	0.732393759822969	1.50242711998443	2.37548071461857
WGP06	0.86740393038413	0.0256835439936508	-0.128095607306879	-0.146492225479795	0.062475	0.1885	4.67851837904011	5.25527250510331	3.20273345804544	3.15760785336167	2.5975855017522	1.19312459835446	0.944482672150169	1	0.913813852383717	0.778151250383644	2.49317912068252	2.69940408181534
WGP07	0.487364823484511	0.0195320773595901	-0.173121037781942	-0.190158007764902	0.0473375	0.21425	3.90579588036787	5.22466252884103	3.07468847308281	3.25223390220582	1.17026171539496	1.02118929906994	0.755874855672491	0.806179973983887	0.707570176097936	0.763427993562937	1.50514997831991	1.96425963019685
WGP08	0.64843642910133	0.0163086183546746	-0.616176674427543	-0.618313578197702	0.0637975	0.1395	5.13924921757161	5.39880773020326	3.13940677044179	3.31444659578719	1.17318626841227	0.913813852383717	0.8750612633917	0.954242509439325	0.819543935541869	0.740362689494244	1.51188336097887	1.87040390527903
WGP09	0.426639174346348	0.015858884883631	-0.0632046531648144	-0.0777894910394965	0.06975575	0.3035	4.2417954312952	5.10071508657308	0.975431808509263	3.28057837036808	1.15228834438306	1.51321760006794	0.698970004336019	0.7481880270062	0.690196080028514	0.880813592280791	1.51321760006794	2.291590825658
WGP10	0.714453239158752	0.0121496979384229	-0.0687156344079456	-0.0848511367836852	0.130475	0.3175	5.35305023964259	5.76320330037077	3.19432004530342	3.47401947535378	1.41830129131975	1.88081359228079	0.857332496431269	1.55630250076729	0.785329835010767	0.8750612633917	1.76192783842053	2.34064237756071
WGP11	0.583562869050396	0.0158048861818694	-0.0717671440646222	-0.0881867312246486	0.05539	0.30825	4.20139712432045	5.22466252884103	3.15922118379038	3.28384375779584	1.18184358794477	1.25285303097989	0.869231719730976	1.01703333929878	0.707570176097936	0.7481880270062	1.97634997900327	2.64345267648619
WGP12	0.583231025526023	0.0249211447162909	-0.08481877110763	-0.099985934781118	0.126475	0.35525	4.09516935143176	5.42398272967718	3.30112770093098	3.68221278852976	2.07990446766672	1.44715803134222	0.755874855672491	0.778151250383644	0.707570176097936	0.770852011642144	2.17782497186468	2.6368889069838
WGP13	0.71281919226026	0.00852847712113839	-0.868140234968044	-0.874198827957386	0.13525	0.325	4.60799085854717	5.07682242334277	0.956648579205203	3.47849434766081	1.13672056715641	1.76863810124761	0.698970004336019	0.740362689494244	0.698970004336019	0.880813592280791	1.51587384371168	2.4072208929274
WGP14	0.834605832296159	0.0212270026485244	-0.530737267355759	-0.527602778026323	0.204	0.32	5.30175321728308	5.5916581082899	3.22057875463283	3.39560592931323	1.23552844690755	0.970036776622557	0.70472233322511	0.7481880270062	0.716003343634799	0.716003343634799	1.37291200297011	2.27966694404846
WGP15	0.244011185270868	0.00827558132304655	-0.516253041276633	-0.491429552902585	0.175666666666667	0.31	4.78485493667815	5.3561533845709	3.43627929167529	3.34731700255325	2.00346053210951	1.61066016308988	0.726998727936262	0.768391413094488	0.7481880270062	0.806179973983887	2.02366391819779	2.30362797638389
WGP16	0.61100426838404	0.0148377785019473	-0.458286255391777	-0.440344950265858	0.0893333333333333	0.226	4.67394199863409	5.01171137966274	0.97924477840938	3.54812724710832	1.23552844690755	1.08398012892939	0.693140460675295	0.988261596728756	0.669006780958576	0.7481880270062	1.36046718351585	2.38237730346811
WGP17	0.753177366569381	0.0125542698710083	-0.670384870098823	-0.653232098081241	0.11305	0.24925	4.97954837470409	5.4180525782375	3.03122662850022	3.59227115897909	1.66745295288995	1.32837960343874	0.740362689494244	0.806179973983887	0.698970004336019	0.770852011642144	1.51719589794997	2.29181268746712
WGP18	0.544395694653826	0.0102022259035273	-0.482311154237347	-0.461607259309489	0.136	0.242	4.97104379183603	5.70354929823823	2.95143466553201	3.69149259470507	1.67760695272049	1.55388302664387	0.707570176097936	0.755874855672491	0.755874855672491	0.826074802700826	1.63346845557959	2.33585891131982
WGP19	0.635756429772677	0.00885694849053131	-0.899007088210793	-0.880476772957434	0.214	0.35	4.90821685308939	5.22814360759774	3.50295259873057	3.75348347378545	1.3384564936046	1.35024801833416	0.698970004336019	0.662757831681574	0.681241237375587	0.763427993562937	1.6159500516564	2.13129779659762
WGP20	0.72620117188066	0.0231116485626894	-0.462080051760542	-0.451313850607386	0.0843	0.3275	4.77048380943111	5.20030318298159	2.71386839128222	3.54425413068401	1.14921911265538	1.50514997831991	0.716003343634799	0.763427993562937	0.690196080028514	0.778151250383644	1.5092025223311	2.29776051109913
WiW01	0.755096206061285	0.0378182863173833	-0.249368496157438	-0.251074879888587	0.292	0.31125	5.0111473607758	5.44777800929462	3.47887659520138	3.69575740096558	0.886490725172482	1.03342375548695	0.792391689498254	0.832508912706236	0.7481880270062	0.99563519459755	2.69565675993619	3.12126430522958
WiW02	0.802022988639515	0.0142087528206942	-0.571446481727211	-0.561617048029855	0.421	0.55	5.01911629044707	5.31481488721072	3.66182214718761	4.05063878612477	1.04532297878666	1.27875360095283	0.838849090737255	0.939519252618618	0.763427993562937	0.959041392321094	2.45954325828041	2.89075625191822
WiW03	0.727267450819184	0.0123899995602637	-0.622869978769002	-0.608770272549462	0.54225	0.6175	5.16420409932403	5.27634689625303	3.60841905131729	3.80833253134879	1.11394335230684	1.1846914308176	0.949390006644913	1	0.755874855672491	0.869231719730976	1.92839585225671	2.24699069924155
WiW04	0.810543736880935	0.0148550727211971	-0.580401318820465	-0.543442227240425	0.4575	0.515	4.89872518158949	4.8767949762007	3.65996846431332	3.84804124689058	0.913813852383717	1.14612803567824	0.857332496431269	0.863322860120456	0.732393759822969	0.897627091290441	2.17143390094301	2.65436909097529
WiW05	0.850149261535017	0.0164686495979081	-0.563348243093589	-0.531302942506198	0.45725	0.5375	5.11544408343624	5.20357677497797	3.67346327485943	3.67249039358157	1.06445798922692	1.16136800223497	0.770852011642144	0.785329835010767	0.863322860120456	0.982271233039568	2.38506977633193	2.75610337158511
WiW06	0.738029803510373	0.0109313192136384	-0.787858773503501	-0.771937989392426	0.30825	0.315	4.45560611258187	4.69019608002851	3.29465357169128	3.63071764701431	1.21218760440396	1.63848925695464	0.707570176097936	0.681241237375587	0.770852011642144	0.832508912706236	2.24575935596728	2.69957759139891
WiW07	0.78682632774878	0.0282852862450479	-0.343603133821003	-0.349021787944396	0.28225	0.3225	4.48215869541128	4.77524625974024	3.57961784736033	3.82900770829139	0.724275869600789	0.851258348719075	0.707570176097936	0.698970004336019	0.724275869600789	0.812913356642856	2.15442397311465	2.65791593682995
WiW08	0.888611978014203	0.0859638743081528	0.0171694274785183	0.0177143273991904	0.2925	0.3175	4.75587485567249	5.12839926871781	3.50694451621342	3.4183924504408	1.11394335230684	1.07918124604762	0.785329835010767	0.7481880270062	0.857332496431269	0.90848501887865	2.23779499327392	2.63638758581316
WiW09	0.877026821993476	0.0564422657698249	-0.12391102840734	-0.127277135811575	0.32775	0.315	4.9804578922761	5.52368144780075	3.80501463842358	3.64756388846004	0.913813852383717	1.08278537031645	0.792391689498254	0.792391689498254	0.716003343634799	0.799340549453582	2.12221587827283	2.47334096418594
WiW10	0.661085259858522	0.00988617671931809	-0.579930331132096	-0.543455331097786	0.37	0.4325	5.48115587082803	5.63588568528127	3.53512948743506	3.5585405788546	0.968482948553935	1.31597034545692	1.73158876518674	0.857332496431269	0.740362689494244	0.826074802700826	2.38863396935179	2.45984464238821
WiW11	0.83800182121822	0.0254501411176704	-0.441776795863387	-0.41991026499139	0.4	0.4425	4.5854607295085	5.05518713855575	3.12394959108183	3.04111622796949	0.653212513775344	1.02938377768521	0.681241237375587	0.707570176097936	0.732393759822969	0.826074802700826	1.7979596437372	2.20357677497797
WiW12	0.776286416375478	0.0153193467906987	-0.620781716530527	-0.604396294424609	0.4035	0.455	4.48643047885443	4.55870857053317	3.07166112344179	2.58331215198308	0.707570176097936	0.778151250383644	0.707570176097936	0.740362689494244	0.732393759822969	0.812913356642856	2.41813549842523	1.98587535730839
WiW13	0.857651999694859	0.0614345805304738	-0.147074244464549	-0.145582300825742	0.39425	0.445	4.93550726582471	5.11176643305256	3.48128493521298	3.83573494968297	1.00432137378264	1.80685802951882	0.792391689498254	0.7481880270062	0.724275869600789	0.819543935541869	2.33324569896196	2.73455982157948
WiW14	0.689787501660116	0.0131485626583404	-0.517376068951553	-0.498514154007675	0.3595	0.415	5.04020662757471	5.03422726077055	3.63635247164967	3.99588517097962	0.924279286061882	1.23044892137827	0.707570176097936	0.740362689494244	0.724275869600789	0.832508912706236	2.62889956442061	3.0972920240919
WiW15	0.754473750131891	0.192081790258236	0.385766948827638	0.387485407611746	0.35025	0.4275	5.00582375302903	5.07900025230385	3.09981870961523	3.45153315111613	0.799340549453582	0.913813852383717	0.716003343634799	0.732393759822969	0.755874855672491	0.799340549453582	1.6222140229663	1.94497590841205
WiW16	0.79948772966185	0.0433077409497204	-0.288404708799729	-0.282938400526047	0.28375	0.27625	5.17405980772503	5.20180664295702	2.75606529394869	3.30892706339405	0.740362689494244	1.11727129565576	0.806179973983887	0.857332496431269	0.7481880270062	0.851258348719075	1.63144376901317	2.51054501020661
WiW17	0.826986789488305	0.0383646144842605	-0.283657327314914	-0.285267658006399	0.22925	0.2635	5.07169794522161	5.54369563230924	3.38845645270027	3.71693357426726	0.897627091290441	1.08278537031645	0.880813592280791	0.939519252618618	0.732393759822969	0.924279286061882	2.31132995230379	2.77158748088126
WiW18	0.88505801728689	0.0237742241205602	-0.502125790672005	-0.49017874480042	0.237	0.2675	4.3701428470511	4.87909587950007	3.38263830586901	3.85339702084913	0.763427993562937	0.8750612633917	0.707570176097936	0.732393759822969	0.707570176097936	0.806179973983887	1.72997428569956	1.96567197122011
WiW19	0.904868599268682	0.0328280996930253	-0.357648483339007	-0.354683695013641	0.45625	0.51	5.32807365451316	5.3674491072686	3.3866505408664	3.76501998117585	0.7481880270062	0.869231719730976	0.690196080028514	0.724275869600789	0.740362689494244	0.799340549453582	2.34183005692051	2.62252486240357
WiW20	0.777221469141917	0.0257474407341794	-0.454530786478295	-0.456053534503943	0.30375	0.385	5.52296559549199	5.26540749653109	2.82836984047191	3.36059341356525	0.792391689498254	1.06818586174616	0.732393759822969	0.778151250383644	0.740362689494244	0.845098040014257	1.92012332629072	2.182129214053
WiW21	0.556793227445063	0.0126144784683061	-0.528464795144634	-0.513158427618959	0.28825	0.37	4.48572142648158	4.65753388755799	3.60586506489299	3.98403648584467	0.785329835010767	1.01703333929878	0.763427993562937	0.812913356642856	0.740362689494244	0.812913356642856	2.53681086599154	2.77144048663991
WiW22	0.752781501332785	0.0197495688369474	-0.484677825366296	-0.462062967231137	0.54825	0.585	5.07114529045108	5.15670055258202	3.30067155483923	3.69449112681708	0.89209460269048	1.11727129565576	0.724275869600789	0.770852011642144	0.740362689494244	0.838849090737255	2.33324569896196	2.87448181769947
WiW23	0.720122923324074	0.0269185541060337	-0.144318256988582	-0.159857466946298	0.31475	0.3775	5.22036963245139	5.25719842613934	2.66053346669809	3.08436175855141	0.812913356642856	0.90848501887865	0.724275869600789	0.755874855672491	0.716003343634799	0.806179973983887	2.44185217577329	2.22167499707077
WiW24	0.835135516186605	0.0246721544128304	-0.4112558770262	-0.419284990632295	0.3555	0.32	5.10397466938639	5.6698745024898	3.05556944006099	2.9259821003271	0.690196080028514	0.819543935541869	0.690196080028514	0.716003343634799	0.724275869600789	0.806179973983887	2.34849957028384	2.32510498297141
WiW25	0.910521450225682	0.0378497351608239	-0.322222695486598	-0.32656734912118	0.2805	0.3	5.20479803819086	5.2312146479626	3.50066177627452	3.77312060152207	1.81954393554187	2.04688519083771	0.770852011642144	0.806179973983887	0.778151250383644	0.851258348719075	2.32572085801941	2.64325522502477
WiW26	0.49989385520266	0.0163820808934285	-0.42523052013463	-0.411655497966815	0.33425	0.3775	5.13417710757677	5.18483333393335	3.44160873935688	3.6504629474807	0.939519252618618	1.23552844690755	0.732393759822969	0.763427993562937	0.724275869600789	0.806179973983887	2.61458086699749	2.96978853741494
WiW27	0.668949365245842	0.0326916422001694	-0.270816528367901	-0.257527540499296	0.48725	0.575	4.94865743214132	5.16420409932403	3.69623840539471	3.80838317065226	1.08635983067475	1.1846914308176	0.986771734266245	0.880813592280791	0.755874855672491	0.845098040014257	2.28891960566173	2.8208579894397
WiW28	0.704909371063733	0.0162242015638916	-0.548528704034405	-0.543754782874621	0.38025	0.4975	4.84260923961056	4.76974646717945	3.26191679257642	3.81367771005487	0.863322860120456	1.22010808804006	0.838849090737255	0.968482948553935	0.755874855672491	0.845098040014257	2.07481644064517	2.72148085477005
WiW29	0.817235438639147	0.0178315346779018	-0.494680436567125	-0.479616659128491	0.49275	0.575	4.85339397745067	4.82477646247555	3.30080193118882	3.16920403652362	0.863322860120456	0.880813592280791	0.812913356642856	0.792391689498254	0.732393759822969	0.812913356642856	1.82412583391655	2.3163897510732
WiW30	0.371716271187289	0.0116177917866447	-0.433781304690356	-0.415271651770347	0.29975	0.278	5.04178731897175	6.02516244246379	3.28662485533174	3.82438294867696	1.28555730900777	1.62117628177504	0.785329835010767	0.851258348719075	1.08635983067475	1.29885307640971	2.19423674872383	2.61235994796777
WiW31	0.75132707359385	0.0221543065709165	-0.415528933899665	-0.407912508077487	0.37	0.395	4.84260923961056	4.98407703390283	3.18531545800366	3.73738349943464	0.819543935541869	0.954242509439325	0.819543935541869	0.785329835010767	0.755874855672491	0.845098040014257	1.7979596437372	2.49982449583958
WiW32	0.418999977318718	0.0119736404645575	-0.463801200248361	-0.442378841894478	0.26425	0.26	4.4661258704182	4.52244423350632	3.41674033367636	3.70412905907246	0.770852011642144	2.29600666931367	0.732393759822969	1.43136376415899	0.7481880270062	0.968482948553935	2.13321945673249	2.54245194737598
WiW33	0.82321213236706	0.0185336265218052	-0.527007662699857	-0.513981996413424	0.271	0.3175	5.36210531929377	5.48628876096057	3.58141484791837	3.82300446765138	1.12710479836481	1.31175386105575	0.792391689498254	0.819543935541869	0.763427993562937	0.857332496431269	2.66219099085901	2.84984919560526
WiW34	0.84531451717374	0.024720910893779	-0.441318468497498	-0.442976380619385	0.27225	0.3475	4.88138465677057	5.00753441789726	3.33754910602743	3.5490339314571	0.826074802700826	1.05307844348342	0.716003343634799	0.740362689494244	0.724275869600789	0.832508912706236	2.14176323027579	2.58815961638309
WiW35	0.220355050656624	0.00682596562659486	-0.529165343074	-0.501843725850171	0.31775	0.4125	4.3541084391474	4.62428209583567	3.10893692358826	2.98909369261033	0.698970004336019	0.90848501887865	0.707570176097936	0.724275869600789	0.724275869600789	0.819543935541869	1.99475694458763	2.26552533521907
WiW36	0.7764684155002	0.0215289035565801	-0.479755245374645	-0.470898805538369	0.3515	0.4825	4.86123561863404	4.95856388322197	1.93951925261862	2.23185172374342	0.681241237375587	0.755874855672491	0.7481880270062	0.785329835010767	0.732393759822969	0.806179973983887	1.56348108539441	1.91009054559407
WiW37	0.872873840206082	0.0282074451914058	-0.403707450758072	-0.407240621658243	0.394	0.49	4.90525604874845	4.96165834863772	3.64082416576519	3.76100642786022	0.934498451243568	1.2148438480477	0.897627091290441	0.934498451243568	0.732393759822969	0.826074802700826	2.42291798076766	2.60086403630984
WiW38	0.677920351652214	0.00935914677242397	-0.566220623591603	-0.543369926680171	0.3035	0.445	5.12106716746773	5.53383558423606	3.22419626966024	3.43027666851777	0.819543935541869	0.973127853599699	0.707570176097936	0.732393759822969	0.740362689494244	0.838849090737255	2.16226561429802	2.44498111208794
WiW39	0.612717388445841	0.0170057733359824	-0.46210292945338	-0.449608710623947	0.34925	0.41	4.94374176583131	4.89209460269048	3.81507941839936	3.82295876927895	0.812913356642856	0.8750612633917	0.724275869600789	0.707570176097936	0.724275869600789	0.832508912706236	2.03462845662532	2.464191370641
WiW40	0.645363267970131	0.014217674632244	-0.461822050451012	-0.442881645486394	0.25525	0.3	4.77887447200274	5.09968064110925	3.29919121431126	3.36956834659655	0.806179973983887	1.07188200730613	0.763427993562937	0.755874855672491	0.819543935541869	0.832508912706236	2.43632170013973	2.69844853801533
WiW41	0.781014764171982	0.0170437369387817	-0.580482762568533	-0.587401678848398	0.24825	0.3075	5.26505378850401	5.30749603791321	3.64312683341833	3.70217626187941	0.977723605288848	1.1846914308176	0.740362689494244	0.763427993562937	0.724275869600789	0.812913356642856	2.63558426631123	2.76305344029961
WiW42	0.810202497076165	0.0264947349310111	-0.349448264265387	-0.366109349901096	0.34025	0.415	4.87128097285797	5.36068806203068	3.56073733050938	3.78714154420037	1.06069784035361	1.22010808804006	0.7481880270062	0.7481880270062	0.770852011642144	0.838849090737255	2.42975228000241	2.80888586735981
WiW43	0.787489392612081	0.0154353089985535	-0.43687424092207	-0.417853878687694	0.343	0.3925	4.9698816437465	5.46292183036934	3.2233531428532	3.62284582960033	0.903089986991944	1.02530586526477	0.819543935541869	0.863322860120456	0.724275869600789	0.812913356642856	1.83378437465648	2.51864552433031
WiW44	0.796096797511642	0.0149310153101616	-0.566223912924562	-0.535983289222012	0.28075	0.355	5.50832767454712	5.47683162851226	3.3096301674259	3.3708090565455	1.24551266781415	1.45484486000851	1.12057393120585	1.1846914308176	0.778151250383644	0.913813852383717	2.22530928172586	2.36735592102602
WiW45	0.860068351665362	0.0284811183335734	-0.382952092619475	-0.380450425918078	0.3495	0.47	5.26904570965762	5.46134843364798	3.04968308908825	3.0276960895348	0.698970004336019	0.799340549453582	0.716003343634799	0.732393759822969	0.724275869600789	0.785329835010767	1.91115760873998	2.54666602507018
WiW46	0.486028174728731	0.0145325040849084	-0.447551085963412	-0.430718797014497	0.3215	0.425	5.24390577021752	5.17347764345299	2.85232747581899	2.72135713002246	0.755874855672491	0.812913356642856	0.681241237375587	0.707570176097936	0.716003343634799	0.792391689498254	2.15381486434453	2.22401481137286
WiW47	0.890893610605989	0.0223001519422778	-0.536630661247612	-0.542102037720582	0.33075	0.4025	4.93247376467715	5.1078880251828	3.22992489730734	3.5837597059993	0.724275869600789	1.69108149212297	0.681241237375587	1.23299611039215	0.698970004336019	0.851258348719075	1.61172330800734	2.57495677576451
WiW48	0.853491705444077	0.0559527614707509	-0.159163402424278	-0.148816830182078	0.32225	0.31	4.88366143515362	5.13798673272353	4.17972266046839	3.26890544121201	0.832508912706236	1.46239799789896	0.832508912706236	1.06069784035361	0.740362689494244	0.826074802700826	1.76192783842053	2.48301642014413
WiW49	0.593391902918977	0.0186056750633346	-0.433131038668701	-0.420126034058977	0.22025	0.23575	5.49616827417498	5.43735412784817	3.65288908525881	3.73314508241286	0.851258348719075	1.21748394421391	0.886490725172482	0.89209460269048	0.724275869600789	0.819543935541869	2.44870631990508	2.44498111208794
WiW50	0.697937786026584	0.0170048602823034	-0.586488001873006	-0.593766995129915	0.28725	0.395	5.01932403715369	5.36921585741014	3.51902689394331	3.63384199014776	0.949390006644913	0.968482948553935	0.838849090737255	0.806179973983887	0.7481880270062	0.819543935541869	2.29534714833362	2.45712462630341
WiW51	0.830001292755341	0.0264647390790437	-0.434113369378647	-0.427887634583095	0.3305	0.41	5.00194994108427	5.3773062510682	3.32466306798784	3.34444139924163	1.06069784035361	1.03742649794062	0.845098040014257	0.806179973983887	0.7481880270062	0.826074802700826	2.47654180902743	2.41664050733828
WiW52	0.783680894839747	0.0201229090425371	-0.455222634364109	-0.445034545016426	0.31025	0.3925	4.64048143697042	4.64640372622307	3.48415742436538	3.68783651470445	0.7481880270062	1.12385164096709	0.716003343634799	0.732393759822969	0.740362689494244	0.819543935541869	2.44653716707364	2.64679568877847
WiW53	0.525258659295742	0.0178699047829134	-0.222346841817649	-0.239221928602601	0.2285	0.2675	5.13640344813399	4.18041263283832	3.51140202968927	3.5487210015899	0.755874855672491	0.863322860120456	0.698970004336019	0.724275869600789	0.716003343634799	0.812913356642856	2.39915433395822	2.48158593636762
WiW54	0.861225525577405	0.0290253039221576	-0.341202548313121	-0.34840234411683	0.34775	0.395	4.94718856552609	5.50460677064195	3.45641158610518	3.5337339384132	0.991226075692495	1.25285303097989	0.740362689494244	0.755874855672491	0.716003343634799	0.826074802700826	2.30168094929358	2.62345604806993
WiW55	0.88513296461717	0.0412720560307428	-0.236586293947481	-0.243099285237714	0.34775	0.3525	5.28137430235505	5.45916623379115	3.60271094495756	3.67683987365989	0.724275869600789	1.11394335230684	0.716003343634799	0.732393759822969	0.732393759822969	0.826074802700826	1.51719589794997	2.38774565960886
WiW56	0.790833390311188	0.0168875310433434	-0.470761908418509	-0.458826673507866	0.253	0.25	5.02673749423875	5.02304658407551	2.95301026189773	3.50531959147649	0.770852011642144	1.9106244048892	0.690196080028514	1.11394335230684	0.732393759822969	0.8750612633917	2.02242837118549	2.44310645673727
WiW57	0.864250396290935	0.0256350774137912	-0.442242013275741	-0.462704761636025	0.2635	0.325	5.21471142100538	5.00667992774083	3.46403474583366	3.58581028045983	1.01283722470517	1.14612803567824	0.799340549453582	0.838849090737255	0.716003343634799	0.880813592280791	2.33505651943909	2.61658053008589
WP01	0.849035688911038	0.0350230701243133	-0.183494930709502	-0.200687410299663	0.24625	0.29225	5.08044609461105	4.95012134751137	3.51740705365215	3.67014840427743	1.06818586174616	1.59328606702046	0.724275869600789	0.763427993562937	0.826074802700826	0.977723605288848	2.45803319249651	2.58467038446435
WP02	0.435052889495296	0.0152313528123603	-0.487124821647697	-0.473254076033164	0.22875	0.3175	4.89790187426823	5.352857562407	3.08441539833186	3.29468662427944	0.968482948553935	1.07188200730613	0.826074802700826	0.7481880270062	0.7481880270062	0.826074802700826	2.34947179921439	2.50324577146511
WP03	0.775939158891846	0.0215619686889537	-0.46145570475808	-0.457734892059463	0.40175	0.4	5.03059972196595	5.46679350234354	3.42477549907116	3.82836984047191	0.913813852383717	1.24303804868629	0.740362689494244	0.7481880270062	0.732393759822969	0.845098040014257	2.04178731897175	2.60959440922522
WP04	0.764191506697829	0.0352642763569741	-0.256764067470341	-0.258832920978338	0.2725	0.38	4.27300127206374	4.28555730900777	3.1398004027373	3.69538972941763	0.869231719730976	1.10037054511756	0.716003343634799	0.755874855672491	0.740362689494244	0.806179973983887	2.23070431361257	2.65906007224094
WP05	0.813810943658453	0.0311120335673168	-0.289461004139265	-0.289988862362223	0.306	0.4225	5.06818586174616	5.25551371281953	3.6920666028271	3.76034707852991	0.949390006644913	1.06069784035361	0.845098040014257	0.919078092376074	0.740362689494244	0.819543935541869	2.53364497879876	2.84596576154548
WP06	0.850605013107228	0.0234904709012376	-0.499793472469369	-0.507842968813344	0.29775	0.405	5.21906033244886	5.44412289941292	3.46799265952115	3.31461499633484	0.812913356642856	1.10380372095596	0.732393759822969	0.863322860120456	0.740362689494244	0.845098040014257	2.09551804232315	2.59173223895184
WP07	0.529083682024477	0.0172492638506269	-0.488055703868044	-0.477342576665117	0.2795	0.375	4.93069438766454	5.04902409791505	3.31356142001477	3.27377651919002	0.770852011642144	0.963787827345555	0.755874855672491	0.799340549453582	0.732393759822969	0.832508912706236	1.59769518592551	1.9804578922761
WP08	0.776046512558089	0.0244204044105622	-0.518751220639898	-0.504919026860049	0.14625	0.1575	4.89597473235906	4.72222246396973	3.67674389344324	4.07500284018835	0.716003343634799	0.897627091290441	0.716003343634799	0.755874855672491	0.724275869600789	0.812913356642856	1.74115159885179	2.12287092286444
WP09	0.894912263233496	0.0341478442711686	-0.36138344519469	-0.356263134270343	0.194	0.30325	5.38827886345964	5.00367590254878	3.6285115370662	3.5658891218911	0.944482672150169	1.15836249209525	0.7481880270062	0.785329835010767	0.740362689494244	0.863322860120456	2.14270224573762	2.50037371435337
WP10	0.76065845568948	0.023190130248851	-0.469672489251147	-0.452204303494292	0.34525	0.485	4.66228551572213	5.14504094003702	3.62442649279586	3.40106434948451	1.28103336724773	1.47129171105894	0.698970004336019	0.698970004336019	0.740362689494244	0.826074802700826	2.71399426766064	2.78589902838438
WP11	0.680674395527188	0.0225210072583676	-0.454297705902228	-0.44017475851105	0.3615	0.44	4.61909333062674	4.85491302230786	3.83374934949561	3.61478124814108	0.770852011642144	1.00860017176192	0.732393759822969	0.732393759822969	0.7481880270062	0.826074802700826	1.94890176097021	2.32878720035453
WP12	0.902003426767474	0.0355391990243116	-0.323474623124659	-0.327091555777957	0.18675	0.2085	3.19033169817029	3.59659709562646	3.8036209694447	3.86117882486454	0.812913356642856	0.986771734266245	0.740362689494244	0.724275869600789	0.732393759822969	0.863322860120456	2.69749088717106	2.77706415474243
WP13	0.1679295894339	0.00797481959343747	-0.0745914014268215	-0.0901596610247663	0.1925	0.20925	4.5971464878337	3.69019608002851	3.70833590268226	3.68766270688584	1.33645973384853	1.65030752313194	0.763427993562937	0.755874855672491	0.724275869600789	0.832508912706236	2.3981136917305	2.61076659477327
WP14	0.346305066096877	0.0110839489201452	-0.0970026158304329	-0.11255613708384	0.259	0.4475	4.36735592102602	4.50650503240487	3.22702497065148	3.51922402275697	1.32428245529769	1.30535136944662	1.30319605742049	1.14921911265538	0.903089986991944	1	2.21537315278342	2.44388854677737
WP15	0.920089844592112	0.0362561457838034	-0.290525979437081	-0.299647062777256	0.1615	0.2575	3.34242268082221	3.85430604180108	3.72084536013243	3.9094971922595	1.11058971029925	1.20951501454263	0.919078092376074	0.880813592280791	0.724275869600789	0.806179973983887	2.3236645356081	2.69214160936678
WP16	0.870227881039824	0.0318067461432417	-0.374526770068711	-0.376722702884486	0.11835	0.13475	3.32221929473392	4.15533603746506	3.33264041038746	3.43274487412905	0.845098040014257	0.968482948553935	0.732393759822969	0.732393759822969	0.724275869600789	0.799340549453582	2.28578227377939	2.62211036036122
WYC01	0.831204155188348	0.0348728199565166	-0.310925440593508	-0.31188682787884	0.7731060205	0.57736911775	4.74741180788642	4.72591163229505	3.99791254928701	3.95519209291763	1.07554696139253	0.944482672150169	0.716003343634799	0.698970004336019	0.724275869600789	0.763427993562937	2.31069331234336	2.11494441571258
WYC03	0.620209640692026	0.0219362310270016	-0.385899465744649	-0.378847862012323	0.72068094125	0.40263268975	4.75396586586516	4.45484486000851	1.53844805171022	3.5679786507012	0.863322860120456	1.47567118832443	0.681241237375587	1.19312459835446	0.7481880270062	0.869231719730976	1.67669360962487	2.70475090429067
WYC04	0.794102543780526	0.0168507053461375	-0.524839204925628	-0.502437338079826	0.9980817965	0.586135105	5.16879202031418	4.82412583391655	1.85582190540603	3.51354386444121	1.47421626407626	2.47085132452612	0.662757831681574	0.724275869600789	0.724275869600789	0.929418925714293	1.85973856619715	2.44075170047919
WYC05	0.416760457785833	0.0104499491262929	-0.487124891891428	-0.463735637528517	0.719829291	0.562691488	4.69679308508174	4.39619934709574	3.79361230141099	3.683042533086	1.36921585741014	1.34044411484012	0.812913356642856	0.886490725172482	0.732393759822969	0.799340549453582	2.45621415535799	2.78326023287295
WYC06	0.583966591105971	0.0208136552465823	-0.105044714141005	-0.122218680888555	0.57780750475	0.407529078	5.42813479402879	4.84292112075998	2.23070431361257	3.61900980442552	0.845098040014257	1.27646180417324	0.653212513775344	0.880813592280791	0.716003343634799	0.763427993562937	1.85003325768977	2.62417892574802
WYC07	0.742735339509128	0.0235172718894562	-0.372200649111401	-0.364022358178709	0.79483935975	0.463035815	4.89042101880091	4.73158876518674	3.37525198206896	3.42435886259033	1.2405492482826	1.01703333929878	0.698970004336019	0.707570176097936	0.7481880270062	0.7481880270062	1.96941591235398	2.81204389793023
WYC08	0.929340896039181	0.0338193222336251	-0.345991034711543	-0.347651665282062	0.63139771175	0.414323975	4.75127910398334	4.96118370981244	3.01165501072478	3.30390849353595	1.17026171539496	0.857332496431269	0.740362689494244	0.8750612633917	0.785329835010767	0.740362689494244	2.29380435991934	2.71138537909845
WYC09	0.364307674504369	0.00650674169845078	-0.542623549813626	-0.515963271609868	0.84646614175	0.55258446475	4.77232170672292	4.73078227566639	3.33724955126186	3.09270310416503	1.15533603746506	1.05690485133647	0.903089986991944	0.851258348719075	0.770852011642144	0.857332496431269	1.9576072870601	2.21748394421391
WYC10	0.731505337758611	0.0310060890493207	-0.247613445132038	-0.250597154241903	0.801816238	0.50238859475	4.64689362416775	4.10209052551184	3.73960794089959	3.5008262973417	1.13353890837022	0.826074802700826	1.19033169817029	1.3384564936046	0.806179973983887	0.838849090737255	1.93601079571521	2.13481437032046
WYC11	0.824248794588905	0.0208565085240918	-0.512716740550391	-0.518308366757309	0.68105859625	0.39508494675	5.12791429437159	4.82380015374988	4.02129682534371	3.94776201459436	1.29885307640971	1.06069784035361	0.690196080028514	0.863322860120456	0.799340549453582	0.785329835010767	1.68484536164441	2.3151303171836
WYC12	0.645010684165888	0.0288367182826769	-0.293942895183391	-0.293519855290396	0.728142604	0.492297942	5.2733485687491	4.9701143222851	3.09504724344897	3.67876413655789	0.755874855672491	1.00860017176192	0.662757831681574	0.707570176097936	0.724275869600789	0.763427993562937	1.6222140229663	2.3059958827708
WYC13	0.612723061409287	0.00941146891736622	-0.496341978621738	-0.471912884335609	0.839446795	0.61868002525	4.67348169707335	4.07736790528416	3.74320000388838	3.86492619153901	1.39967372148104	1.52633927738984	0.863322860120456	1.13033376849501	0.845098040014257	1.03342375548695	2.35888620440587	2.67033864112744
WYC16	0.436304297848637	0.014713277789932	-0.440945409976074	-0.424391635917322	0.522431031	0.40411316525	4.6222140229663	5.08421868673924	3.83565887000828	3.83686190258338	1.27415784926368	1.07918124604762	0.845098040014257	0.90848501887865	0.770852011642144	0.819543935541869	1.8555191556678	2.34103863167752
WYC17	0.749142705806198	0.0308113898971409	-0.246134961181656	-0.257740452042269	0.208778123	0.42022717725	4.82184092720045	5.14050804303818	3.37938711030136	3.5177961030383	0.903089986991944	1.06069784035361	0.690196080028514	0.707570176097936	0.755874855672491	0.819543935541869	1.80208925788173	2.36530074863799
WYC18	0.500648157557908	0.0101361295871988	-0.551699705870627	-0.520899126256341	0.72421233825	0.495215187	4.97634997900327	4.49415459401844	1.16435285578444	3.49451635537372	0.672097857935718	1.14612803567824	0.653212513775344	0.724275869600789	0.724275869600789	0.755874855672491	1.75281643118827	2.50119624202709
WYC19	0.765956523037415	0.0310898174118194	-0.254182742434939	-0.270360813943541	0.6365659755	0.38396842125	5.12710479836481	5.24017469501928	3.74022448289779	3.76491925358161	1.24303804868629	1.12710479836481	1.08278537031645	1.17609125905568	0.755874855672491	0.806179973983887	1.70586371228392	2.03261876085072
WYC20	0.608369884991997	0.0242234350784282	-0.351973168863086	-0.347579333352284	0.6652262025	0.37950715625	5.10209052551184	5.24735942246894	3.68381673291675	3.58142054085856	1.06069784035361	1.37657695705651	0.643452676486187	0.845098040014257	0.724275869600789	0.89209460269048	2.26857797188284	2.45453998496482
WYC21	0.450053565946073	0.0104875486327846	-0.4904410281213	-0.468016245003623	0.769190292	0.42369752525	4.57863920996807	4.21085336531489	3.47007221529011	3.55634472178954	0.968482948553935	0.949390006644913	1.01703333929878	1.10720996964787	0.732393759822969	0.778151250383644	2.19340290306242	2.02077548819356
WYC22	0.429663727104956	0.0146063968714661	-0.441401898697147	-0.424820066326049	0.59756369775	0.4117079845	4.16879202031418	4.32735893438633	3.35978806769036	3.3618694306986	1.28330122870355	1.17609125905568	0.690196080028514	0.7481880270062	0.763427993562937	0.838849090737255	2.12548126570059	2.46014581749175
WYC23	0.608303116431895	0.0241968085783456	-0.0773802489312559	-0.0940307368312964	0.557913587	0.4476604725	5.30803055426611	5.43719545247852	3.99695580878544	3.58223954613532	1.2405492482826	1.2405492482826	0.698970004336019	0.812913356642856	0.806179973983887	0.90848501887865	1.79865064544527	2.32817566143832
WYC24	0.625033646607129	0.0129314934585086	-0.447950754525809	-0.427074911364001	0.8914299595	0.451887415	5.06557971472845	4.91881639036038	3.22820780960568	3.68543269754626	1.25767857486918	1.36735592102602	0.732393759822969	0.959041392321094	0.716003343634799	0.763427993562937	1.73319726510657	2.80982896106789
WYC25	0.774469197796325	0.129913248993056	0.229652586254265	0.226432595785568	0.68017476125	0.56612131875	5.10551018476997	4.99651167215418	3.53284352120324	3.61471797987283	1.25285303097989	1.19033169817029	0.929418925714293	1.10380372095596	0.778151250383644	0.806179973983887	2.3003780648707	2.50133317864557
WYC27	0.688709560401093	0.0276277403020861	-0.366471263340405	-0.367529740118493	0.78483962325	0.5134083575	4.8992731873176	4.91115760873998	3.84191293696721	3.82485772255285	1.25767857486918	1.07918124604762	0.939519252618618	1.00432137378264	0.785329835010767	0.903089986991944	2.19534605834842	2.52994340165867
WYC28	0.921396023958807	0.0328843130688322	-0.353223676941729	-0.362020774412145	0.70443872375	0.43528814125	3.37106786227174	4.91855453055027	3.78514112510326	3.81740669419013	1.24797326636181	1.02530586526477	0.716003343634799	0.763427993562937	0.724275869600789	0.755874855672491	2.13703745478951	2.67778939106886
WYC29	0.61606315813634	0.0260827352291792	-0.099372300127153	-0.116092288790646	0.637217562	0.391421358	4.8561244442423	4.70757017609794	2.86826227921595	3.63536812062459	0.724275869600789	1.01703333929878	0.57978359661681	0.732393759822969	0.716003343634799	0.7481880270062	1.58206336291171	2.48939592172713
WYC30	0.432538200642415	0.0211388430327142	-0.385904102720548	-0.376730247139437	0.78894486775	0.53914268875	4.9554472105777	4.72713442376049	2.87860795649383	3.49472492685479	0.724275869600789	1.2718416065365	0.690196080028514	0.897627091290441	0.716003343634799	0.89209460269048	1.58883172559421	2.47538059314336
WYC31	0.671922128349784	0.0309933514165492	-0.128696119187624	-0.142590611941087	0.64763024	0.43713244325	5.12952877385878	5.27300127206374	3.24712593410983	3.40425198811691	1.03742649794062	0.968482948553935	0.924279286061882	1.02938377768521	0.770852011642144	0.799340549453582	2.53920159929413	2.95250184786302
WYC32	0.962012399718521	0.0479789965208879	-0.200270738887523	-0.205316920330416	0.64563283775	0.46816450775	4.42078061954857	4.99211148778695	3.81919175104201	3.62825095577075	1.48000694295715	1.22010808804006	1.1846914308176	0.954242509439325	0.785329835010767	0.929418925714293	2.40088321554836	2.34321159017975
WYC33	0.52730061017726	0.0143219026039309	-0.171077210951508	-0.190343862523759	0.207530576	0.43588014875	4.46164856806346	4.67024585307412	3.91820601218076	4.05617469936344	1.1846914308176	1.08635983067475	0.716003343634799	0.707570176097936	0.763427993562937	0.770852011642144	1.80002935924413	2.11494441571258
WYC34	0.668339768044323	0.0245884918187219	-0.128435295829772	-0.144564491582036	0.622653922	0.47692403875	6.12473239772003	5.56002624891289	3.47112294899858	3.69842679665807	1.43775056282039	1.54157924394658	0.740362689494244	1.55266821611219	0.763427993562937	0.869231719730976	1.69810054562339	2.62107237114363
WYC35	0.644301366166729	0.0248858287680546	-0.134772592078763	-0.152753317744353	0.473285182	0.341163336	5.14875685132179	5.16494737262184	3.64043671326794	3.96113384262963	1.01283722470517	1.38560627359831	0.707570176097936	0.897627091290441	0.716003343634799	0.792391689498254	2.22530928172586	2.93716670371503
WYC36	0.899013526202961	0.0362371416902965	-0.30391075083552	-0.30721593203421	0.60819484925	0.39618696125	4.46686762035411	4.78283080520259	1.66558099101795	3.70242191940603	0.806179973983887	1.41995574848976	0.672097857935718	1.10380372095596	0.724275869600789	0.897627091290441	1.6170003411209	2.69992440274248
WYC37	0.904397535473904	0.0346166614587717	-0.314954041535157	-0.320942821414075	0.58651752625	0.350731287	5.17304050755106	4.93626234190348	3.60503554909126	3.4619110156368	1.48713837547719	1.46089784275655	0.826074802700826	0.934498451243568	0.949390006644913	1.05307844348342	2.74099393158489	3.18258582545729
WYC38	0.577743829682758	0.0246703800138784	-0.0905369635035694	-0.107646020033524	0.63969706	0.4232646915	5.47646932392638	4.85763398515001	3.74044953970589	3.78328526971816	1.10037054511756	1.11727129565576	0.724275869600789	0.778151250383644	0.7481880270062	0.799340549453582	2.37984917876283	2.85205280869785
WYC39	0.934785194281461	0.0458612575964375	-0.237362424998121	-0.235088335999466	0.596121346	0.3284314915	5.38390508697691	5.34684176964225	3.69680181453134	3.63900810352324	1.17318626841227	0.886490725172482	0.653212513775344	0.698970004336019	0.785329835010767	0.792391689498254	2.33162971762993	2.53932706353938
WYC40	0.609026643407328	0.0175757764268473	-0.403832759808007	-0.389557895538514	0.7567256505	0.32061110925	5.40277706961035	5.19214912501853	3.59684990236287	3.67071423014551	1.24303804868629	0.982271233039568	0.799340549453582	0.919078092376074	0.732393759822969	0.770852011642144	1.90363251608424	2.42308195829723
WYC43	0.160261720572243	0.00657309012236373	-0.0853999872621226	-0.101756816604852	0.52568314175	0.3073446045	5.34586362850376	5.10363270520974	3.73364256988753	3.60878268352965	1.39445168082622	1.06445798922692	0.770852011642144	1.06818586174616	0.724275869600789	0.826074802700826	1.80685802951882	2.60831204269733
WYD01	0.813589699756787	0.0271060680842699	-0.37027535582574	-0.367661182384373	0.565	0.4025	5.60546666413537	5.62675085368339	1.27989498001164	3.89377285500649	0.672097857935718	1.31597034545692	0.763427993562937	0.785329835010767	0.7481880270062	0.792391689498254	1.66464197555613	3.01978073040365
WYD02	0.745335788204413	0.0176466386263153	-0.473014664539285	-0.457897051020593	0.5175	0.6175	5.67108023273885	5.54157924394658	3.65689320112102	3.83148263836362	1.59549622182557	1.64933485871214	0.838849090737255	0.863322860120456	1.32428245529769	1.17318626841227	1.8109042806687	2.3600250891894
WYD03	0.905100563231955	0.0266824584784	-0.445453814005214	-0.438925155230815	0.56	0.6075	5.5686709780099	5.41396997174806	1.13193929521042	3.20811874073828	0.681241237375587	0.954242509439325	0.792391689498254	0.812913356642856	0.716003343634799	0.732393759822969	1.6954816764902	2.35314654621398
WYD04	0.874137358656543	0.0298148638993108	-0.3843063815168	-0.394608954593161	0.4225	0.5125	5.44388854677737	5.36614267681489	3.89369519841586	3.74903252857956	0.897627091290441	1.11394335230684	0.681241237375587	0.785329835010767	0.832508912706236	0.913813852383717	1.8109042806687	2.30728204703335
WYD05	0.737286542183101	0.0193001264474393	-0.574884749039203	-0.596426847480525	0.3825	0.4775	5.40010607042854	5.32004237547964	3.86900864636518	3.87276793470648	1.72916478969277	1.73878055848437	0.740362689494244	0.7481880270062	0.806179973983887	0.869231719730976	2.5556988947189	2.73029766209715
WYD07	0.807818068038693	0.0227966549754392	-0.518505913694757	-0.529667368967183	0.4725	0.5825	5.59356295225897	5.45347123372294	3.9088708869466	3.90331521883997	1.2380461031288	1.18184358794477	0.7481880270062	0.792391689498254	0.7481880270062	0.763427993562937	2.74460587541424	3.15494104473033
WYD08	0.745706811742106	0.0206444287151104	-0.454920228677096	-0.450504374458168	0.37825	0.47	5.46996920949996	5.45976931596674	3.94361074090316	3.67799910046869	1.17318626841227	0.963787827345555	0.707570176097936	0.698970004336019	0.732393759822969	0.763427993562937	2.81438079446994	2.83815618475215
WYD10	0.86051433214091	0.033852465819233	-0.336215125480325	-0.341888485434425	0.4075	0.5725	5.43949059038968	5.4766142820325	4.06624017635577	3.68004528235746	1.34830486304816	1.10380372095596	0.763427993562937	0.716003343634799	0.770852011642144	0.755874855672491	2.91397271155097	2.94215692846749
WYD11	0.696487392366837	0.0175932286946741	-0.62171026656745	-0.644087772057246	0.4675	0.6375	5.50684313633935	5.21906033244886	4.01733390068085	3.7938741633263	1.3654879848909	1.12057393120585	0.698970004336019	0.716003343634799	0.724275869600789	0.740362689494244	2.89019738621003	2.87366929270679
WYD12	0.87962979072677	0.0325473713213665	-0.323833520796678	-0.335958887874128	0.36	0.5975	5.53013563824546	5.3701428470511	2.34849957028384	3.39240674056846	0.90848501887865	1.44715803134222	0.662757831681574	0.716003343634799	0.724275869600789	0.857332496431269	1.72835378202123	2.36492603378998
WYM01	0.443889379051617	0.0125090324672845	-0.528670208437125	-0.506892215236384	0.544893452	0.657846768	5.12791429437159	4.82930377283103	3.88622837720348	3.67789881730265	1.39619934709574	1.16136800223497	0.763427993562937	0.698970004336019	0.732393759822969	0.778151250383644	2.32097667734282	2.67924614541386
WYM03	0.73614287801802	0.028809554781496	-0.34620998147904	-0.350164388109078	0.68622428225	0.6174621415	4.9649663748311	4.52048353274079	3.83139940707085	3.63296822395252	1.10037054511756	1.15228834438306	0.819543935541869	0.8750612633917	0.740362689494244	0.763427993562937	2.24600590407603	2.53794495929149
WYM04	0.728403729903433	0.0257895865225795	-0.0784090334194799	-0.0920365768309409	0.74520181175	0.49487667225	4.68841982200271	4.65513843481138	2.12270725431835	3.69601546048857	0.819543935541869	1.20951501454263	0.662757831681574	0.770852011642144	0.690196080028514	0.806179973983887	2.27554168840131	2.39984671271292
WYM05	0.736400859936433	0.0274282116326306	-0.135792088050998	-0.153335537294499	0.77933676375	0.568049829	5.56080300199396	5.56726169235387	1.22010808804006	3.74531686671017	0.653212513775344	1.11394335230684	0.633468455579587	0.653212513775344	0.662757831681574	0.763427993562937	1.59328606702046	2.52374646681156
WYM06	0.932639274738775	0.0327779616036235	-0.370213599530181	-0.379092836358698	0.6743174405	0.55771461175	5.10191883368042	4.86805636182304	3.76241971009541	3.76186772429739	1.16136800223497	1.15533603746506	0.740362689494244	0.812913356642856	0.724275869600789	0.785329835010767	1.94497590841205	2.43933269383026
WYM07	0.930246179589028	0.031442200431206	-0.407198070092975	-0.408046977840263	0.69747671525	0.5400121875	4.93901977644867	4.8055008581584	3.71618287058824	3.66090340599672	1.28103336724773	1.21748394421391	0.755874855672491	0.740362689494244	0.716003343634799	0.755874855672491	2.12287092286444	2.46657107238635
WYM08	0.754927473095048	0.0219725603894958	-0.495842834640942	-0.474457128669621	1.00407373675	0.58524248675	5.02816441942447	5.00238207493276	3.621347679981	3.66994415491548	1.34044411484012	1.30102999566398	0.740362689494244	0.799340549453582	0.785329835010767	0.99563519459755	1.94890176097021	2.60788374435699
WYM09	0.633939594908886	0.0220280032550574	-0.457534041252986	-0.455830086145871	0.67502452825	0.72820930075	4.82898195400792	4.52698506856	3.92480115979197	3.92438009272343	1.06445798922692	0.913813852383717	0.792391689498254	0.792391689498254	0.7481880270062	0.799340549453582	2.12548126570059	2.10653085382238
WYM10	0.744760927586263	0.0205829165666556	-0.483807407572303	-0.471335745975334	0.74464434325	0.5917161135	4.97289678443654	4.77378644498119	3.68398759108555	3.42971998924944	1.68841982200271	1.55144999797288	0.672097857935718	0.672097857935718	0.740362689494244	0.763427993562937	2.43806745045349	2.77261504984917
WYM11	0.906199405146143	0.0375756253672662	-0.290221408750884	-0.298656706824147	0.6965221385	0.602928615	4.78354628227035	4.58092497567562	3.85460053329424	3.8491183132675	0.755874855672491	2.70311934623608	0.643452676486187	1.07918124604762	0.707570176097936	0.763427993562937	1.62940959910272	2.40551710697638
WYM12	0.65823822524199	0.0163068738234057	-0.622365288307681	-0.658789125503678	0.68065847875	0.555943444	4.89431606268444	4.65753388755799	3.59534738984134	3.7688045365724	1.07918124604762	1.15533603746506	0.7481880270062	0.806179973983887	0.690196080028514	0.832508912706236	1.77742682238931	2.48158593636762
WYM13	0.861054888409306	0.0372681817514741	-0.280540933000556	-0.287453464533564	0.75412722025	0.59318956175	5.2254385168055	4.87852179550121	2.89251199290224	3.57871941526262	1.5327543789925	1.78887511577542	0.633468455579587	0.690196080028514	0.740362689494244	0.826074802700826	1.59328606702046	2.3701428470511
WYM14	0.843943398308171	0.0214587683169944	-0.54139662501969	-0.516965021427683	0.6782274475	0.48374397675	5.4148898217696	4.73759016628572	3.80247269252521	3.81112573452071	1.31806333496276	1.27646180417324	0.681241237375587	0.919078092376074	1.15228834438306	1.26481782300954	2.22375545365724	2.86905561870191
WYM15	0.878384561457827	0.0235369580921027	-0.459265259852167	-0.459209978722609	0.903505494	0.55375785375	5.25587527339147	5.12759067700796	3.91682754427681	3.92095249605757	1.39619934709574	1.17318626841227	0.716003343634799	0.812913356642856	0.763427993562937	0.778151250383644	2.41979058610636	2.71121652432109
WYM16	0.807812253202269	0.0411137370077812	-0.0578545575476712	-0.0724299487781974	0.74260476975	0.50228447225	4.97382032435268	4.77305469336426	3.75780204095472	3.64511756680654	1.40483371661994	0.986771734266245	0.8750612633917	0.8750612633917	0.7481880270062	0.763427993562937	2.31827208021163	2.41979058610636
WYM17	0.425220179996699	0.0117494380163726	-0.532845747476471	-0.508544045915817	0.80179982325	0.637742248	5.09008161803882	4.52698506856	3.93555260742916	3.99312969120842	1.33041377334919	1.03742649794062	1.03742649794062	0.977723605288848	0.826074802700826	0.755874855672491	2.42520805113866	2.68484536164441
WYM18	0.625301576204127	0.0120634655967362	-0.521739982823235	-0.506626346882002	0.83656293625	0.6110419875	5.1646502159343	4.97703733522468	3.79950940892044	3.63736963148476	1.22530928172586	1.03742649794062	0.724275869600789	0.724275869600789	0.724275869600789	0.778151250383644	2.49262072204319	2.5908418347816
WYM19	0.817921537887538	0.0250986484022229	-0.386297354468352	-0.375861301709729	1.08477723125	0.810148863	4.93272736730153	5.19465307195293	3.79828455148034	3.73656779567257	1.13672056715641	1.01283722470517	0.778151250383644	0.812913356642856	0.732393759822969	0.740362689494244	2.38003024796783	2.80942502879703
WYM20	0.761761179796753	0.0259228683335629	-0.118902299395047	-0.136143231313469	0.94127376475	0.562842435	5.46434048462767	5.46134843364798	3.14446523116493	3.10107656116322	1.06445798922692	0.851258348719075	0.770852011642144	0.785329835010767	0.724275869600789	0.740362689494244	1.87966920563205	2.1914510144649
WYM24	0.83734270138274	0.0269954481972742	-0.392482428927713	-0.38844677640915	0.906720054	0.490583376	4.99978279845414	4.61647551388857	3.09687526805969	3.69820062199864	1.06069784035361	1.2148438480477	0.690196080028514	0.778151250383644	0.732393759822969	0.763427993562937	1.64738297011462	2.73639650227664
WYM26	0.749566655533981	0.0235897329392562	-0.442676715405115	-0.444411849588599	0.799410198	0.561159932	5.03261876085072	4.64689362416775	3.66482054479562	3.52128849098566	0.886490725172482	1.20682587603185	0.672097857935718	1.04921802267018	0.732393759822969	0.770852011642144	2.19948091486236	2.06258198422816
WYM28	0.832801862201121	0.11588145014566	0.143246353417071	0.143259377848546	0.85552269175	0.529942901	5.2978698913999	5.36940141369662	2.92407242991036	3.607331687517	0.707570176097936	1.13353890837022	0.633468455579587	0.740362689494244	0.716003343634799	0.770852011642144	1.59217675739587	2.38255732190879
WYM30	0.83575782140571	0.035108462856102	-0.249540108728801	-0.256790931478673	0.7946764865	0.51720694325	5.20723030984835	4.83600745912553	3.41288875054779	3.45493628080285	1.13353890837022	1.12057393120585	0.792391689498254	0.919078092376074	0.740362689494244	0.799340549453582	2.40925665203891	2.66558099101795
WYM31	0.781593433053739	0.0262587074352998	-0.435226089881994	-0.445184129627781	0.85504217775	0.56674684075	5.34004731766139	5.03502928220237	3.35302134350619	3.40792600623425	0.792391689498254	0.819543935541869	0.662757831681574	0.690196080028514	0.732393759822969	0.792391689498254	2.43806745045349	2.85805571805036
WYM32	0.881040523936775	0.026868245701874	-0.409312759647386	-0.40672351998865	0.77608999375	0.59125608075	5.05115252244738	4.90091306773767	3.74694929833768	3.73918059082142	1.30319605742049	1.29885307640971	0.857332496431269	0.792391689498254	0.7481880270062	0.763427993562937	2.39199307225971	2.22089224921952
WYM34	0.83856395158277	0.0205682144864013	-0.452299650418669	-0.438723573375628	0.9958483795	0.6538927085	5.27218983145044	4.94275192042981	3.62317173088668	3.62111913400445	1.47129171105894	1.31597034545692	0.732393759822969	0.7481880270062	0.792391689498254	0.869231719730976	2.35640832703898	2.62500360101486
WYM35	0.82036179284466	0.0243759091417451	-0.453247682884272	-0.43817575017938	0.801560858	0.560109819	4.28216877830464	4.3021143769562	3.8010673961095	3.897646331759	2.93303149510241	3.12208475071087	0.681241237375587	0.698970004336019	1.77959649125782	1.99211148778695	2.91750550955255	3.30805192124266
WYM36	0.869534668658784	0.0249419131684935	-0.415665757444701	-0.409732550033079	0.9063355455	0.54624895875	5.50051091052634	5.16938049531195	3.95165802059175	3.84247506182541	1.44247976906445	1.64542226934909	0.832508912706236	0.991226075692495	0.8750612633917	1.1430148002541	1.8394780473742	2.47842218774008
WYM37	0.908809704999111	0.0284863770262328	-0.402824274355937	-0.412788259561692	0.838091315	0.56241959025	5.16166741243774	4.79133970396514	3.55083960506578	3.75997740518566	1.34439227368511	1.52244423350632	0.778151250383644	0.869231719730976	0.792391689498254	0.812913356642856	2.14050804303818	2.37584643630916
WYM38	0.714471015036663	0.0140754017592985	-0.715926161362434	-0.713289544047949	0.74967898725	0.381505204	4.72509452108147	4.53083977861652	3.64976796340871	3.46298913444161	0.954242509439325	1.06445798922692	0.924279286061882	1.05690485133647	0.792391689498254	0.832508912706236	2.05690485133647	1.95036485437612
WYM40	0.906556279934198	0.0336553846251294	-0.281859181694598	-0.293962356827793	0.9196409605	0.478322403	4.99100444033076	4.78532983501077	3.61100065270505	3.37047607954429	1.79098847508882	1.37106786227174	0.690196080028514	0.716003343634799	0.812913356642856	0.755874855672491	2.43408963841789	2.92767826413799
WYM41	0.907321687734948	0.031515623295322	-0.37882081423343	-0.373951412907777	0.67216330475	0.542689593	5.08314414314305	4.8372727025023	3.6952758632075	3.69930862198818	1.5705429398819	1.31597034545692	0.792391689498254	0.8750612633917	0.812913356642856	0.8750612633917	2.20978301484852	2.82846654735268
WYM42	0.834744419834414	0.0271013004338935	-0.378177654426741	-0.370173957650962	0.7829052585	0.5356955225	5.22076165397514	4.97520196225785	3.69691964493045	3.59871939479202	0.681241237375587	0.724275869600789	0.672097857935718	0.681241237375587	0.755874855672491	0.740362689494244	1.84757265914211	2.04766419460156
WYM43	0.805588078675783	0.031525856749976	-0.313292287456157	-0.309344865039091	0.84830278675	0.56295190075	4.731185707634	4.61172330800734	3.49033077300365	3.48065358884337	1.19312459835446	0.939519252618618	0.681241237375587	0.681241237375587	0.7481880270062	0.770852011642144	1.95472479097906	2.41313205043487
WYM44	0.762288608578984	0.0332391545523543	-0.227791997045514	-0.233872950997064	0.76258081975	0.43875458525	5.24551266781415	4.825101411598	3.67975939660133	3.57930332146215	1.29666519026153	1.06445798922692	0.732393759822969	0.755874855672491	0.778151250383644	0.763427993562937	2.11126251365907	2.24278980947868
WYT01	0.73531821881189	0.0366896688386542	-0.295117725747131	-0.286802460541771	0.21975	0.255	4.64394591274807	4.91960102378411	3.3021793538132	3.44733636567042	1.2405492482826	0.913813852383717	0.707570176097936	0.698970004336019	0.740362689494244	0.740362689494244	2.43949059038968	2.65953590715422
WYT02	0.88485829732983	0.026543822824404	-0.445278107843812	-0.435168314050811	0.2185	0.335	4.83122969386706	4.99299509843134	3.87931669967346	3.87522336974031	2.01786771896351	1.31175386105575	0.8750612633917	0.8750612633917	0.7481880270062	0.732393759822969	2.1914510144649	2.55606115900953
WYT03	0.560842725768426	0.0174917738906192	-0.633771557758721	-0.593015658031081	0.198	0.3525	4.92941892571429	4.86746748785905	4.09304501656814	3.86896460518496	2.33041377334919	1.37291200297011	0.857332496431269	0.8750612633917	0.968482948553935	1.02530586526477	2.66482994114309	2.91719030851156
WYT04	0.839686203010951	0.0310266637118294	-0.373498728664782	-0.375483570557388	0.23775	0.4025	4.87157293554588	5.02345823764368	3.7906475114671	3.76619341347995	2.17347764345299	1.23044892137827	0.812913356642856	0.845098040014257	0.826074802700826	0.792391689498254	2.32674537956532	2.648164778574
WYT05	0.889129509897599	0.0291795418066669	-0.401118752793348	-0.406991433587091	0.236	0.4475	4.99585447987457	4.96918285923226	3.8140677126092	3.85237323678863	2.27091163941048	1.25767857486918	0.732393759822969	0.778151250383644	0.812913356642856	0.806179973983887	2.43424945239648	2.84435289631089
WYT06	0.865305059088124	0.0191944829567174	-0.486247381819988	-0.461103392205533	0.198	0.445	5.53039182140104	5.17362325769808	3.17978151583698	3.37751569663559	2.75495958772171	0.851258348719075	0.732393759822969	0.763427993562937	0.7481880270062	0.740362689494244	1.74115159885179	3.07470675647187
WYT07	0.79509726676198	0.0147219832938938	-0.539434852427287	-0.516483663540519	0.245	0.47	5.46930644543117	5.422343571355	3.82793439282374	3.8249747103595	2.14238946611884	1.28780172993023	0.90848501887865	0.913813852383717	0.845098040014257	0.838849090737255	2.2559957267224	2.65388755807098
WYT08	0.757023062753239	0.0129250463252551	-0.543390879206375	-0.522000336793445	0.31525	0.4925	4.83505610172012	5.36295345894429	3.72895812655	3.70682442309405	2.09061070782841	1.11394335230684	0.707570176097936	0.724275869600789	0.832508912706236	0.838849090737255	2.29269900304393	2.53313628827864
WYT09	0.607479588037631	0.0155952067467309	-0.12377908383291	-0.139846969768395	0.224	0.2725	4.91222205653242	4.97772360528885	3.72099812880078	3.75790443267555	1.96614173273903	1.31386722036915	0.732393759822969	0.792391689498254	0.880813592280791	0.89209460269048	2.15198239545747	2.68788552484871
WYT10	0.815960483515475	0.0231143321259834	-0.445413053145299	-0.434649259249918	0.31125	0.455	5.00710738297406	5.25017594808392	3.35741071074714	3.62655592106283	1.32633586092875	1.31597034545692	0.716003343634799	0.812913356642856	0.732393759822969	0.792391689498254	2.13545069934551	2.56784945057311
WYT100	0.900308076979445	0.0499401948233615	-0.208624445593718	-0.201502458287569	0.3975	0.605	5.60298188793341	5.56377763336217	3.99862545651286	3.90101399128552	1.68841982200271	1.73798732633343	0.886490725172482	1.12057393120585	0.845098040014257	0.857332496431269	2.61971926561173	3.1226745132062
WYT101	0.78048308920185	0.0973401264435399	0.0592000333125546	0.0675143077801412	0.4275	0.6225	5.13385812520333	5.18440748541232	3.60342045714846	3.83380984572665	1.2405492482826	1.66464197555613	0.770852011642144	0.724275869600789	0.732393759822969	0.897627091290441	2.3932241163613	2.73774907389156
WYT102	0.574652333408554	0.0218409617266861	-0.424549872209776	-0.411450273056632	0.456	0.3985	5.24117278677005	5.15926633109349	4.09285392948241	3.97075354623149	1.21748394421391	1.24797326636181	0.707570176097936	0.886490725172482	0.812913356642856	0.886490725172482	2.44027921323559	2.68601029131529
WYT103	0.920984772532117	0.0289135832093503	-0.393401085984729	-0.385779282325958	0.54	0.685	5.42496326326074	5.35305023964259	3.99657077070861	3.87907866801707	1.2380461031288	1.18752072083646	0.681241237375587	0.698970004336019	0.7481880270062	0.7481880270062	2.76900787094377	2.90784114258294
WYT104	0.441468318413443	0.0106396076520602	-0.49600988834975	-0.473675917843783	0.44	0.5175	5.04453976039241	5.07972377513992	4.05532671760823	4.02422493065918	1.78675142214556	2.12090281761453	0.690196080028514	0.707570176097936	0.785329835010767	1.05307844348342	2.88332067838298	3.35648478060522
WYT105	0.733655530652567	0.0167508101792995	-0.616391589073067	-0.645872445125093	0.5	0.66	5.33805787541976	5.25478968739721	4.18527010443007	4.08558488518131	1.69983772586725	1.80821097292422	1.06445798922692	0.991226075692495	0.819543935541869	0.832508912706236	2.4020893505721	2.902111723448
WYT106	0.689938878372446	0.0145874657533253	-0.61150390081438	-0.577055789437242	0.4675	0.685	5.20709554041922	5.13560963602868	3.94725722325794	3.822586474855	1.71180722904119	1.59988307207369	0.869231719730976	0.863322860120456	0.826074802700826	0.806179973983887	2.6534054906645	2.94304911100841
WYT107	0.891311665504265	0.0226339101918211	-0.479448267039926	-0.459570686777066	0.39	0.6575	5.497275286358	5.33041377334919	3.65091918509012	3.82042150758926	1.3096301674259	1.38021124171161	0.924279286061882	1.1430148002541	1.29666519026153	1.46834733041216	2.18525876529658	2.96571897024422
WYT108	0.842630547853423	0.0274646662632245	-0.39038474345175	-0.392919357719983	0.30575	0.5275	5.04099769242349	5.37948681371727	1.17897694729317	3.45651026783188	0.662757831681574	1.09342168516224	0.89209460269048	0.672097857935718	0.732393759822969	0.924279286061882	1.69635638873333	2.40874860618424
WYT109	0.852465117368063	0.0281640606883501	-0.398521158335261	-0.397355968723002	0.37475	0.5075	4.61542395288594	4.75625564875423	3.74065475300808	3.70875647753657	1.18184358794477	1.87966920563205	0.662757831681574	0.991226075692495	0.968482948553935	1.06069784035361	2.29841638006129	2.91041093991469
WYT110	0.931738294047711	0.040363489086235	-0.228885966094627	-0.232446234102385	0.5075	0.422	5.55744704614936	5.57460994134019	3.86354887240061	3.91572424755977	1.69635638873333	1.68574173860226	0.740362689494244	0.857332496431269	0.755874855672491	0.863322860120456	2.42078061954857	2.9198100201702
WYT111	0.895631524656351	0.0391593309345402	-0.306666545375284	-0.307860266285331	0.435	0.61	5.29808856939138	5.24907600368361	3.98371872834354	3.8854262462379	1.75587485567249	1.49415459401844	0.897627091290441	0.770852011642144	0.826074802700826	0.785329835010767	3.00638045854969	3.06460772013063
WYT112	0.841506068939663	0.0215468185776246	-0.467049281548297	-0.458535642373636	0.56	0.745	5.3142886609475	5.13481437032046	3.9565525919174	3.71475294869408	1.77305469336426	1.60852603357719	0.812913356642856	0.903089986991944	0.973127853599699	1.04139268515823	2.8636796678759	3.05442152446254
WYT113	0.532200903064459	0.0150020650410441	-0.491353029483455	-0.474897247670034	0.365	0.45	5.0015173768235	5.1832698436828	3.99642629337527	3.80152032952716	1.87448181769947	1.65321251377534	0.690196080028514	0.755874855672491	0.832508912706236	0.880813592280791	2.76064861958136	2.8842287696326
WYT114	0.854445928494242	0.0288949947525452	-0.403953392197474	-0.413819384987328	0.44	0.538	5.19159072637921	4.89569872695931	1.38827886345964	3.81968867624706	0.681241237375587	1.39794000867204	0.792391689498254	0.819543935541869	0.716003343634799	0.778151250383644	1.68214507637383	3.09422648522204
WYT115	0.441418835480177	0.0179512211337168	-0.432547077230504	-0.419640411338304	0.4025	0.5725	5.39724458101039	5.42934847292366	3.88440449294085	3.7598943740255	1.4345689040342	1.35793484700045	0.732393759822969	0.806179973983887	0.863322860120456	0.832508912706236	2.34693946269899	2.63788981658079
WYT13	0.828800340599208	0.0178295430030659	-0.529086832545074	-0.517847955143307	0.2725	0.39225	5.47914324797861	5.16657810991965	3.80673266902653	3.71675018871926	1.91803033678488	1.34242268082221	0.763427993562937	0.792391689498254	0.792391689498254	0.826074802700826	2.47450763911698	2.56050441519506
WYT14	0.870079994558402	0.0253949218664476	-0.471759652347663	-0.475936474426332	0.17475	0.3	5.28205537068371	5.05728564441822	3.62284065459176	3.53509148643037	1.80277372529198	1.32837960343874	0.707570176097936	0.707570176097936	0.716003343634799	0.732393759822969	2.52270499273475	2.79802879340407
WYT15	0.913142903210579	0.0309093074197731	-0.368027270777421	-0.36487722143822	0.17575	0.36	5.08475496317935	5.0918427497381	3.87830631820485	3.85721485907831	2.36772854608698	1.52113808370404	0.944482672150169	1.21748394421391	0.982271233039568	0.857332496431269	2.35659943572497	2.74303915480493
WYT16	0.766329134622498	0.0187016128361116	-0.57251946524299	-0.534471923838465	0.234	0.475	4.89707700320942	5.07936216439305	3.9287490849734	3.86804753460972	2.67412598274271	1.24303804868629	0.770852011642144	0.785329835010767	0.812913356642856	0.869231719730976	2.5497387312649	2.98891552051269
WYT17	0.812366450110414	0.0254752074408702	-0.440959520865778	-0.447904988700658	0.21075	0.22	5.34429400589831	5.00796103333618	3.68700249492458	3.7058551630958	2.16256440652302	1.20951501454263	0.886490725172482	0.963787827345555	0.812913356642856	0.763427993562937	2.06258198422816	2.54357142396237
WYT19	0.543937382936066	0.0137182730337289	-0.539594349063358	-0.510710284263726	0.1815	0.31	5.25370138101199	5.10771861052026	3.7120938531249	3.78462085825438	2.09551804232315	1.37839790094814	0.8750612633917	0.792391689498254	0.778151250383644	0.792391689498254	2.20574554094266	2.62654565902713
WYT20	0.771314245125122	0.0168656677723476	-0.523240905254541	-0.495174604758729	0.25075	0.395	5.04766419460156	5.26458172923808	4.00911931162045	3.78649587963633	2.37217528611506	1.33243845991561	0.903089986991944	0.845098040014257	0.832508912706236	0.785329835010767	2.53224464362658	2.66604973848052
WYT21	0.839818130001755	0.0278969728616594	-0.378128581340108	-0.369371315302286	0.24275	0.3975	5.44083039840128	5.22128379949269	3.6670464872562	3.71077296792137	1.77232170672292	1.41664050733828	0.869231719730976	1.07188200730613	0.806179973983887	0.785329835010767	2.36642295722597	2.40001963506516
WYT22	0.819839912056858	0.0302803097008539	-0.333024947273072	-0.328243508554778	0.183	0.31	4.8494194137969	4.98833595585605	3.79782131136402	3.71390615802673	1.90633504180509	1.50105926221775	0.763427993562937	0.886490725172482	0.778151250383644	0.845098040014257	2.36604920980024	2.40551710697638
WYT23	0.867956878059811	0.0275963340824154	-0.399446376919563	-0.382039543511288	0.201	0.355	5.1156105116743	5.12057393120585	3.77575967696478	3.69142189508941	2.10311925354571	1.3654879848909	1.03742649794062	1.06818586174616	0.838849090737255	0.897627091290441	2.54826654517075	2.57680189582891
WYT24	0.789026723919416	0.0217880784344574	-0.433353491868456	-0.418210133396741	0.332	0.4525	4.73719264270474	5.17231096852195	3.77034012591306	3.66120671075416	2.13225968953104	1.3096301674259	1.19033169817029	1.00860017176192	0.832508912706236	0.838849090737255	2.31260043926126	2.51917146382166
WYT25	0.839545914776655	0.0160736471502652	-0.569145141046984	-0.549009038320239	0.233	0.205	4.7748817658188	4.87563993700417	3.90931528208604	3.70808931595646	1.99607365448528	1.2380461031288	0.812913356642856	0.812913356642856	0.826074802700826	0.785329835010767	2.45117215751254	2.70552161342267
WYT26	0.86554559016735	0.0321990578597793	-0.339902487743048	-0.344485647282593	0.195	0.2945	4.94522231663534	4.99738638439731	3.9126391403624	3.77702424280575	2.17172645365323	1.09342168516224	0.770852011642144	0.826074802700826	0.832508912706236	0.755874855672491	2.34927752746796	2.56714404519566
WYT27	0.856921272844728	0.0823912110119205	0.00632923380681676	0.0117222661776239	0.28975	0.2925	5.60573589387675	5.36370597285472	3.95376210715745	3.73549510368778	2.19755621315354	1.12057393120585	0.740362689494244	0.732393759822969	0.863322860120456	0.819543935541869	2.46701581843844	2.76192783842053
WYT28	0.739248580973968	0.0362862087012335	-0.317138152982642	-0.305480483619259	0.21175	0.3375	4.94001815500766	4.90118578013715	3.98714989827254	3.75956964527076	2.04532297878666	1.58994960132571	1.0899051114394	1.45331834004704	1.35024801833416	0.929418925714293	2.4714384073893	2.50906804501716
WYT29	0.843723466429787	0.0215708537322667	-0.466529989507675	-0.457765275044522	0.259425	0.355	5.45324187301948	5.42036837985752	3.75972071210426	3.76182639101045	1.77959649125782	1.09342168516224	0.778151250383644	0.819543935541869	0.716003343634799	0.7481880270062	2.33000770087276	2.47943133719774
WYT30	0.75393896941896	0.0326540943756664	-0.338838418870705	-0.335002113244395	0.15825	0.305	5.61463360784179	5.0618293072947	3.4801004068772	3.78971816999322	1.31386722036915	0.991226075692495	0.698970004336019	0.792391689498254	0.716003343634799	0.880813592280791	1.62428209583567	2.41830129131975
WYT31	0.778195830842132	0.0199201177506663	-0.484265159424079	-0.46905634115936	0.20425	0.32625	4.93550726582471	4.95230800966212	3.29063552626155	3.37844332686543	1.40823996531185	1.40312052117582	0.740362689494244	1.06069784035361	0.880813592280791	0.770852011642144	2.30319605742049	2.47871075551276
WYT32	0.602376309190898	0.0233938825492791	-0.367062737892337	-0.360731386876829	0.1401125	0.219	4.88649072517248	5.05499586152914	3.77498385495651	3.76351409514008	2.08493357493672	1.29225607135648	0.812913356642856	0.755874855672491	0.799340549453582	0.832508912706236	2.29269900304393	2.70174063243721
WYT33	0.808070493280029	0.024472572007137	-0.513358447570611	-0.502119155163404	0.222	0.2075	4.88366143515362	5.00302947055362	3.88741473235833	3.67514109238462	2.05269394192497	1.46538285144842	1.12057393120585	0.968482948553935	0.8750612633917	0.806179973983887	2.29446622616159	2.66875854175096
WYT34	0.881870545599476	0.0277319360761682	-0.404135507355132	-0.407352560939519	0.205	0.34	4.91301868374796	5.04355874691473	3.83661839926489	3.88385157476849	1.74036268949424	1.40823996531185	0.949390006644913	1.14612803567824	0.959041392321094	0.886490725172482	2.07298474462793	2.5762261374496
WYT36	0.753136601245242	0.0200303583396314	-0.501152083163156	-0.481337021930236	0.1865	0.35	4.85521619473336	4.91907809237607	4.00542934515687	3.63673857138595	1.98272338766855	1.2380461031288	0.806179973983887	0.806179973983887	0.991226075692495	0.819543935541869	2.31910605930978	2.65156873886579
WYT37	0.639983796962758	0.018313675853796	-0.522288540513995	-0.501080725937747	0.23075	0.4	5.07645838771215	5.06370855939142	3.81550137484258	3.64961715573259	2.22685757028872	1.13033376849501	0.799340549453582	0.755874855672491	0.763427993562937	0.732393759822969	2.43568513794163	2.67098760301003
WYT38	0.888617959670092	0.055483386102992	-0.180044377395025	-0.183040567339838	0.2215	0.42	5.22167499707077	4.99891290435879	3.7782236267661	3.62229175368545	1.73319726510657	1.28330122870355	1.06445798922692	1.13353890837022	0.903089986991944	0.903089986991944	2.51995918075207	2.75327657018442
WYT39	0.769929369931031	0.0211734335254139	-0.503034008683131	-0.48860751278865	0.242	0.4225	5.11727129565576	5.28566980596007	3.6372695244189	3.46478751964594	2.18639121569549	1.09342168516224	0.806179973983887	0.763427993562937	0.812913356642856	0.732393759822969	2.23578087032756	2.66940986728778
WYT40	0.828999074074521	0.020080059605044	-0.513247687789934	-0.51125507727328	0.27975	0.3975	4.87880893235921	5.38774565960886	3.16764219548217	3.30681089561863	1.19312459835446	0.851258348719075	0.681241237375587	0.681241237375587	0.716003343634799	0.740362689494244	2.03382569395331	2.17840134153376
WYT41	0.905059736364746	0.0213861416239257	-0.537534505324989	-0.537697425502147	0.26705	0.305	4.91933963678741	4.95109455684166	3.61948464569923	3.71614947584342	1.75281643118827	1.11058971029925	0.732393759822969	0.763427993562937	0.716003343634799	0.792391689498254	2.16554107672237	2.61119206086843
WYT42	0.816719980201159	0.0232699082214462	-0.450438227782297	-0.449953430026759	0.2375	0.3575	4.77305469336426	5.08278537031645	3.50939744050251	3.75013796809047	1.83058866868514	1.45331834004704	1.08278537031645	1.16136800223497	0.763427993562937	0.949390006644913	1.98136550907854	2.62716095237478
WYT43	0.817221993784538	0.0230892976563377	-0.425330533472303	-0.404060145612198	0.268175	0.34	5.34869419026554	4.90336133625532	3.77609070936599	3.75830997004167	1.51982799377572	1.39967372148104	0.732393759822969	0.919078092376074	0.812913356642856	0.857332496431269	2.31764554322116	2.54207814633563
WYT44	0.852190227270582	0.0162543301570314	-0.633032834585685	-0.623604667150008	0.245225	0.3575	4.90173069172922	5.05076631123304	3.63172272375699	3.63696906469571	2.12417805547468	1.38381536598043	0.903089986991944	0.968482948553935	0.863322860120456	0.897627091290441	2.19645254170339	2.75181778773688
WYT45	0.862947649394723	0.0315673203371924	-0.331473739897012	-0.317061030207781	0.236	0.425	5.33253944689011	4.96070855168856	3.68628314977484	3.72136950408348	1.48995847942483	1.30535136944662	0.851258348719075	0.851258348719075	0.806179973983887	0.857332496431269	2.20303288701471	2.60238559010511
WYT46	0.860043016545851	0.024802250202947	-0.443162781258192	-0.441294408822984	0.1705	0.357	5.35955091676332	5.13465514227765	3.57769281556954	3.71652501875086	2.19256745333655	1.58319877396862	1.44870631990508	1.39619934709574	0.812913356642856	0.919078092376074	1.88024177589548	2.51693180886801
WYT47	0.305878082694997	0.00334911238041278	-0.524062709230481	-0.494583780066881	0.1499	0.28025	4.74585519517373	4.98091193777684	3.66314946419996	3.65513363064231	2.11793383503964	1.36172783601759	0.806179973983887	0.99563519459755	0.89209460269048	0.845098040014257	2.25815819334079	2.69407846208076
WYT48	0.895608663098884	0.0976847497430131	0.0685878486457387	0.0702884528790701	0.18025	0.34075	4.99321572047414	5.16776026643563	3.57748031041324	3.4612808748101	2.1034616220947	1.02530586526477	0.7481880270062	0.732393759822969	0.740362689494244	0.7481880270062	2.36847283844036	2.53668467262093
WYT49	0.84027916350188	0.0262351531075129	-0.405413986518532	-0.394095794766363	0.2325	0.22775	5.02201573981772	5.07188200730613	3.53286898704597	3.55724847301445	2.055378331375	1.44870631990508	0.792391689498254	1.01283722470517	0.845098040014257	0.903089986991944	2.25935492730803	2.71808629478309
WYT50	0.872929980444082	0.0326270051501086	-0.374978351411449	-0.369737656394503	0.18925	0.33	4.76974646717945	5.03282014943856	3.73864977494478	3.79577229895493	1.34044411484012	0.880813592280791	0.690196080028514	0.778151250383644	0.778151250383644	0.732393759822969	2.04257551244019	2.19920647916166
WYT51	0.86382026203016	0.0214494108693445	-0.471232708171528	-0.466455297880054	0.204	0.345	5.15090987370112	4.95133751879592	3.70837415359448	3.78903397494267	1.9532763366673	1.29446622616159	0.740362689494244	0.724275869600789	0.732393759822969	0.755874855672491	2.17289469775218	2.44294986957786
WYT52	0.787034263624336	0.022007378800681	-0.439057488316692	-0.431284040669892	0.214	0.375	4.95448371715555	5.13033376849501	3.38874931627747	3.66119249807455	1.3096301674259	1.21748394421391	0.707570176097936	0.812913356642856	0.755874855672491	0.755874855672491	2.40019248859258	2.62767303176662
WYT53	0.874646019997615	0.0568319045582847	-0.172935526169825	-0.170843686477178	0.17775	0.3775	5.36087729710204	5.24341014165371	3.63667340979535	3.84892771322708	2.31993843998031	1.31386722036915	0.863322860120456	0.986771734266245	0.851258348719075	0.755874855672491	2.28510702956681	2.62961344537818
WYT54	0.891489589476345	0.0245993746415979	-0.457541469238811	-0.451077814788426	0.17275	0.334	5.03382569395331	4.93851972517649	3.69837461295953	3.85302861471299	1.96941591235398	1.47275644931721	0.812913356642856	0.919078092376074	0.740362689494244	0.812913356642856	2.23704079137919	2.62076048999421
WYT55	0.857654632067741	0.0212014114750907	-0.457800428999312	-0.438815849299484	0.23225	0.3715	5.38987455839099	5.15442397311465	3.61238115323532	3.8118564018515	2.10890312766731	1.54900326202579	0.770852011642144	1.07554696139253	0.939519252618618	0.863322860120456	2.20682587603185	2.89058866770549
WYT56	0.844129016635159	0.0210662962835831	-0.48381502871567	-0.471698607658529	0.23025	0.404	4.82151352840477	5.14597290280218	3.27228264429087	3.60243983284319	1.26481782300954	1.22530928172586	0.716003343634799	0.959041392321094	0.90848501887865	0.763427993562937	2.02448566769917	2.27438879555038
WYT57	0.875354632870829	0.0347936955190564	-0.30471677423635	-0.307453162820623	0.17835	0.205	4.66698571832966	5.01828430842653	3.69942143589346	3.85230001692259	1.78604121024255	1.39269695325967	0.740362689494244	0.778151250383644	0.785329835010767	0.819543935541869	2.18610837981321	2.62096843564429
WYT58	0.841605224155517	0.0713088742681638	-0.0406441355081425	-0.0366011443825694	0.453	0.45575	5.25587527339147	5.34772021703404	3.66796633098433	3.71153307319336	2.03502928220237	1.23552844690755	0.785329835010767	0.716003343634799	0.716003343634799	0.763427993562937	2.4519398693651	2.69328715700566
WYT59	0.822056099630319	0.0347465292900039	-0.279462891872752	-0.268761543836136	0.219	0.29525	5.1167737269759	5.21391600964402	3.59307551611353	3.70833165237294	2.05384642685225	1.29885307640971	0.845098040014257	0.857332496431269	0.732393759822969	0.806179973983887	2.36865871239223	2.68367729881869
WYT60	0.845754447972426	0.0238135443046468	-0.433759738314348	-0.425822117240981	0.22325	0.315	4.9566485792052	5.24735942246894	3.48291643950227	3.5536888851646	1.41161970596323	1.34635297445064	0.806179973983887	1.10380372095596	0.99563519459755	0.785329835010767	1.92992956008459	2.22891340599469
WYT61	0.855621350365827	0.0271259427839461	-0.377325280914043	-0.373726343469773	0.2205	0.42275	5.16046853111904	5.11859536522376	3.61325496950219	3.79403818302049	1.88874096068289	1.42324587393681	0.778151250383644	0.832508912706236	0.845098040014257	0.886490725172482	2.3386556655787	2.66829271044822
WYT62	0.605204245040898	0.00749158458658976	-0.155651805232622	-0.175426837000691	0.1965	0.2446	4.45712462630341	5.02734960777476	4.47981851606979	4.25665281337714	1.36735592102602	1.57863920996807	1.04139268515823	2.74601110775193	1.32428245529769	1.47129171105894	1.72916478969277	2.43071988786328
WYT64	0.334752244643635	0.0149855195178529	-0.446228002659798	-0.429936769844018	0.3225	0.531	5.01786771896351	5.17897694729317	4.05688770779488	4.033636829205	1.52762990087134	1.45178643552429	0.869231719730976	0.886490725172482	0.792391689498254	0.819543935541869	2.99576677904997	3.44490316279546
WYT65	0.870241688346532	0.0347191223207436	-0.281236796098885	-0.282776988364178	0.12525	0.55275	3.42324587393681	5.24625231229932	3.75268213209621	3.54896645584907	1.37291200297011	1.22788670461367	0.698970004336019	0.707570176097936	0.819543935541869	0.826074802700826	2.74460587541424	2.74499667403856
WYT66	0.503474694804469	0.0229386698600603	-0.382510458138844	-0.373262611899837	0.27	0.6475	5.02958667163046	5.23829706787539	1.1156105116743	3.70475518978839	0.672097857935718	0.763427993562937	0.672097857935718	0.755874855672491	0.698970004336019	0.806179973983887	1.6730209071289	1.94448267215017
WYT67	0.711025657437378	0.0210478258189128	-0.427878185052229	-0.419952483961812	0.43	0.6675	5.08707120590654	5.04336227802113	3.84851240741663	3.78816837114117	1.39619934709574	1.39093510710338	0.707570176097936	0.662757831681574	1	1.07918124604762	2.62961344537818	2.78781456706302
WYT69	0.333034460138596	0.0125652372055957	-0.473817920931064	-0.454909389121204	0.4475	0.6175	5.5705429398819	5.69683673057516	3.93834707381637	3.86896166894747	1.38381536598043	1.39093510710338	0.869231719730976	0.913813852383717	0.763427993562937	0.778151250383644	2.97234171632575	3.25149221456958
WYT71	0.861735739417339	0.0251831883396777	-0.422614038268851	-0.409633734794664	0.44775	0.51825	5.49692964807322	5.65108408924301	1.21879799811174	3.68949976463031	0.672097857935718	1.01283722470517	0.672097857935718	0.681241237375587	0.7481880270062	0.7481880270062	1.6954816764902	2.25527250510331
WYT72	0.848133141037197	0.0218386909060526	-0.522597514418863	-0.496895143335405	0.5525	0.67	5.46014581749175	5.21444644571839	3.96991189900699	3.85244644431225	1.30749603791321	1.30319605742049	0.90848501887865	0.869231719730976	0.799340549453582	0.812913356642856	2.92448604373392	3.26686644122118
WYT73	0.840202906862232	0.0335597192893514	-0.310579444444763	-0.320195811378592	0.5225	0.53925	5.50913528887917	5.38480127896208	3.46617041115788	3.54942018083649	0.812913356642856	0.944482672150169	0.662757831681574	0.897627091290441	0.799340549453582	0.812913356642856	1.81557774832427	2.26576091671761
WYT74	0.762735699205389	0.0334412218678998	-0.300535883880792	-0.297745741527299	0.5875	0.665	5.67043140936061	5.32746110930314	1.7041505168398	2.95588008622538	0.662757831681574	1.11058971029925	0.653212513775344	0.690196080028514	0.732393759822969	0.755874855672491	1.68841982200271	2.39654803798713
WYT75	0.690831849798338	0.0279588543083416	-0.328050503677841	-0.32137071163144	0.4925	0.7125	5.30663944102426	5.14875685132179	3.96969308270519	4.01559235087058	1.08278537031645	1.15533603746506	0.977723605288848	0.778151250383644	0.740362689494244	0.7481880270062	2.95985195479961	3.38201704257487
WYT76	0.770125403088661	0.0247784003325223	-0.404027687616971	-0.399736237408826	0.515	0.625	5.18069920129603	5.18497519069826	4.03339761660654	3.98393509913339	1.45484486000851	1.62428209583567	0.986771734266245	1.21748394421391	0.845098040014257	0.939519252618618	3.00659438618414	3.55351894014897
WYT77	0.904973511961314	0.0264056798408569	-0.444468562113244	-0.442869176808842	0.4825	0.6475	5.49234125325497	5.56943243592494	2.55242484570409	3.19817579799939	1.08278537031645	1.45331834004704	0.653212513775344	0.690196080028514	0.819543935541869	1.09691001300806	1.69635638873333	2.03382569395331
WYT78	0.814086397863195	0.0185516165631002	-0.470080625518576	-0.458254708885333	0.5475	0.443	5.43743344379797	5.47885496752866	1.29225607135648	3.78829567008318	0.662757831681574	0.929418925714293	0.662757831681574	0.763427993562937	0.716003343634799	0.7481880270062	1.67669360962487	3.15621588267676
WYT79	0.788267091528296	0.0226526489459062	-0.432255872514719	-0.426021073769453	0.4625	0.58	5.47268332961304	5.36445718511883	3.94687210927498	3.60992507272166	1.34439227368511	1.13033376849501	0.812913356642856	0.7481880270062	0.897627091290441	0.806179973983887	2.79253176190131	2.9036867317365
WYT80	0.556917748881569	0.0142994786197644	-0.514301152131331	-0.489045627981679	0.705	0.7725	5.30941722577814	5.30427505047713	3.82008317861952	3.68360981463211	1.17609125905568	1.06069784035361	0.716003343634799	0.698970004336019	0.763427993562937	0.778151250383644	2.73078227566639	3.02209829746114
WYT81	0.913817637335354	0.0311677119319273	-0.373894775727032	-0.377647621415233	0.535	0.635	5.44443517300675	5.42160392686983	4.0966736925249	3.88598281135497	1.51054501020661	1.56820172406699	1.31175386105575	1.41830129131975	0.869231719730976	0.845098040014257	2.78979216773068	3.04793651613808
WYT82	0.914277284648002	0.0261931758519377	-0.444053218929845	-0.446031449555736	0.6075	0.6325	5.52750101098112	5.25995205992225	4.06564879305139	3.7679013215866	1.85672889038288	1.43296929087441	1.04532297878666	0.944482672150169	0.929418925714293	0.819543935541869	2.8213169705911	3.01157044359728
WYT83	0.927751305568223	0.0336698106767564	-0.325617497192017	-0.328446325718481	0.555	0.6825	5.4483197649335	5.49547495588932	3.8630342261133	3.84700783255814	1.47856649559384	1.46686762035411	0.806179973983887	1.04139268515823	0.99563519459755	0.982271233039568	2.86958370771342	3.07247048230389
WYT84	0.857335627878493	0.0382667026698874	-0.255822416753808	-0.257282033580573	0.5175	0.57	5.63139303071276	5.57199981639706	1.3021143769562	3.77521346781152	0.672097857935718	1.27415784926368	0.732393759822969	0.724275869600789	0.724275869600789	0.770852011642144	1.69722934275972	3.10595276923698
WYT85	0.590304040574833	0.0281549930388484	-0.326029736709799	-0.323077530348135	0.4725	0.57	5.40363518979055	5.55357964243181	3.61338721266621	3.50062063626767	0.913813852383717	1.02118929906994	0.707570176097936	0.857332496431269	0.778151250383644	0.819543935541869	1.80002935924413	2.39984671271292
WYT86	0.846982719025975	0.0255535535436077	-0.466225705808343	-0.45915210880669	0.443	0.27825	5.32294251635301	5.19520754950275	3.66451505277958	4.09695691427948	1.82216807936802	1.8998205024271	0.707570176097936	0.869231719730976	0.806179973983887	0.869231719730976	2.46119828862249	2.99659922270017
WYT88	0.225640934584591	0.00807792783597757	-0.519267688019472	-0.495433135969904	0.52	0.525	5.33625955201419	4.89320675305985	3.83344036891742	3.79427537851869	1.08278537031645	1.08635983067475	0.863322860120456	0.934498451243568	0.763427993562937	0.806179973983887	2.62335268153799	3.00138752348664
WYT89	0.310418230321839	0.0127981369280044	-0.472375682348113	-0.452759165140964	0.385	0.54	4.88166990767206	5.15609463063943	4.05393274005765	3.91976561685274	1.65991620006985	1.62013605497376	0.740362689494244	0.845098040014257	0.869231719730976	0.812913356642856	2.75495958772171	3.21616590228599
WYT90	0.640039487049138	0.0211021173720836	-0.458864765122528	-0.449919134128638	0.535	0.53	5.44878358962896	5.17926446433903	3.98183445704501	3.92131443527052	1.44404479591808	1.3384564936046	0.716003343634799	0.740362689494244	0.806179973983887	0.819543935541869	2.50392680419351	2.78660947264866
WYT91	0.833939522229309	0.0195562886094965	-0.4906457496203	-0.475653466177392	0.5525	0.6525	5.41371876506108	5.13353890837022	3.62556451558996	3.42935655274584	1.57518784492766	1.17897694729317	0.716003343634799	0.698970004336019	0.763427993562937	0.740362689494244	2.7626035495668	2.83859725281666
WYT92	0.879112819773822	0.0820343921431285	-0.00247647122351867	0.00233349111750955	0.535	0.6375	5.55473137667597	5.36754227352058	3.91585868895835	3.69760417418553	1.46982201597816	1.20411998265592	0.763427993562937	0.698970004336019	0.770852011642144	0.799340549453582	2.85454893581295	3.00449333754727
WYT93	0.654888583489932	0.0224713201951696	-0.380176437634785	-0.371128024338219	0.4625	0.5275	5.38363586836188	5.44715803134222	4.00046661580696	3.87377384540527	1.42488163663107	1.45331834004704	0.954242509439325	0.968482948553935	0.806179973983887	0.845098040014257	2.84602767536438	3.06468256622851
WYT96	0.830030789277094	0.0340035902740148	-0.261554971449262	-0.268870459241987	0.445	0.5725	5.14628311315959	5.23477029516092	4.04459071253214	3.90551525166984	1.86805636182304	1.77887447200274	0.929418925714293	0.944482672150169	1.04532297878666	1.03742649794062	3.00744904449775	3.25964165342886
WYT97	0.774684561170219	0.0173997732125556	-0.656041931427548	-0.600131367667212	0.4775	0.44725	5.5472823079633	5.50317760941806	3.5331617369606	3.82604887389805	0.963787827345555	1.26717172840301	0.653212513775344	0.838849090737255	0.838849090737255	0.845098040014257	2.08919836680515	2.45362407359145
WYT99	0.851498779272852	0.0317591345260099	-0.351452440634433	-0.350022985426278	0.4975	0.6175	5.39427652676782	5.39846084960822	4.07133327199093	3.97743550393563	1.37106786227174	1.12710479836481	0.724275869600789	0.763427993562937	0.755874855672491	0.755874855672491	2.81497968376076	3.18386747715217
