# Supplementary material for: Relationships between community composition, productivity and invasion resistance in semi-natural bacterial microcosms
Source: eLife. 2021 Oct 18;10:e71811. doi: 10.7554/eLife.71811 (PMC8523168; doi:10.7554/eLife.71811)
Supplement: Figure 4—source data 1. — Key columns are model (model specification type in terms of extent to which productivity mediates the effect of composition), df (degrees of freedom), cfi (comparative fit index), rsq_inv (R2 for invasion), AICc (AIC value), and Delta AICc (delta AIC value). [file elife-71811-fig4-data1.csv]

	model	df	cfi	rsq_inv	AICc	Delta_AICc
1	No mediation	348	0.60744536183781	0.207800252796846	37864.5012692291	166.981250049881
2	Partial	347	0.630722413525577	0.488972181950132	37697.5200191793	0
3	Complete	348	0.629780687951597	0.511238435325666	37702.9337772985	5.41375811925536
