# Supplementary material for: Relationships between community composition, productivity and invasion resistance in semi-natural bacterial microcosms
Source: eLife. 2021 Oct 18;10:e71811. doi: 10.7554/eLife.71811 (PMC8523168; doi:10.7554/eLife.71811)
Supplement: Figure 4—source data 2. — Key columns include Model (model specification type in terms of extent to which productivity mediates the effect of composition), Interpretation (path being represented by the coefficient), Std.coefficient (standardised regression coefficient). [file elife-71811-fig4-data2.csv]

	Model	Path	Interpretation	Std.coefficient
1	No mediation	A	Invasion ~ Productivity	0
2	No mediation	B	Productivity ~ Composition	0.506042520225313
3	No mediation	C	Invasion ~ Composition	-0.455851130081791
4	Partial mediation	A	Invasion ~ Productivity	-0.630337458644414
5	Partial mediation	B	Productivity ~ Composition	0.470883915542622
6	Partial mediation	C	Invasion ~ Composition	-0.127149407034458
7	Partial mediation	D = A * B	Invasion ~ Productivity | Composition	-0.296815770639668
8	Partial mediation	E = A - D	Productivity-only effect on invasion	-0.333521688004747
9	Complete mediation	A	Invasion ~ Productivity	-0.715009395270905
10	Complete mediation	B	Productivity ~ Composition	0.505141831751421
11	Complete mediation	C	Invasion ~ Composition	NA
12	Complete mediation	D = A * B	Invasion ~ Productivity | Composition	-0.361181155646621
13	Complete mediation	E = A - D	Productivity-only effect on invasion	-0.353828239624284
