# Supplementary material for: Relationships between community composition, productivity and invasion resistance in semi-natural bacterial microcosms
Source: eLife. 2021 Oct 18;10:e71811. doi: 10.7554/eLife.71811 (PMC8523168; doi:10.7554/eLife.71811)
Supplement: Source data 1. — OTU names are their species-level taxonomic assignments. [file elife-71811-data1.csv]

Community	candidatus_rhabdochlamydia.spp.	epilithonimonas.lactis	sphingobium.yanoikuyae	methylobacterium.organophilum	anaerosporobacter.spp.	bdellovibrio.spp.	alkanindiges.spp.	bacillus.thermoamylovorans	anoxybacillus.spp.	paenibacillus.spp.	achromobacter.xylosoxidans	exiguobacterium.undae	bacillus.niacini	caenimonas.spp.	paenibacillus.favisporus	erythrobacter.spp.	barnesiella.spp.	carnobacterium.maltaromaticum	lautropia.spp.	granulicella.spp.	owenweeksia.spp.	exiguobacterium.panipatensis	paucimonas.spp.	leptotrichia.buccalis	rhodobacter.spp.	cytophaga.spp.	methylobacillus.flagellatus	escherichia_shigella.spp.	streptomyces.yanglinensis	alkanindiges.illinoisensis	bradyrhizobium.elkanii	burkholderia.andropogonis	desulfovibrio.spp.	cedecea.spp.	streptomyces.olivoviridis	pseudomonas.rhizosphaerae	pseudomonas.alcaligenes	lactobacillus.iners	pelosinus.spp.	anaerococcus.octavius	virgibacillus.necropolis	tepidimonas.spp.	clostridium.intestinale	pseudomonas.marincola	hyphomicrobium.spp.	dysgonomonas.spp.	paenibacillus.barengoltzii	tissierella.praeacuta	roseomonas.spp.
AE01	0	1	0	0	2	0	0	0	0	2	1	0	1	147	0	1	0	1	0	0	0	0	6	0	0	0	0	87	0	0	0	0	0	11	0	15	0	0	0	0	0	0	0	5	0	0	0	0	0
AE02	1	2	4	0	0	0	0	0	0	2	1	1	1	60	4	8	0	0	0	0	0	0	9	0	1	0	0	71	0	0	1	0	0	2	0	27	0	0	0	0	0	0	0	15	0	0	0	0	0
AE03	2	1	1	0	0	0	0	0	0	0	1	2	1	1	0	0	0	0	0	0	0	0	2	0	0	0	0	147	0	8	0	0	0	0	0	15	1	0	0	0	0	0	0	9	0	0	1	0	0
AE04	0	66	0	0	0	0	0	0	0	3	1	2	1	1	1	1	0	1	0	0	0	1	4	0	0	0	0	101	0	1	0	0	0	9	0	20	0	0	0	0	0	0	0	24	0	0	0	0	0
AE06	1	2	0	0	0	0	0	0	1	1	183	1	0	25	0	0	0	0	0	0	0	0	14	0	0	0	0	156	0	2	0	0	0	3	0	8	0	0	0	0	0	0	0	14	0	1	0	0	0
AE07	0	1	0	0	0	0	0	16	1	2	1	0	1	1	1	1	0	1	0	0	0	0	14	1	0	0	2	11	0	0	0	1	0	9	0	21	0	0	0	1	0	5	0	15	0	0	2	0	0
AE08	0	1024	0	0	0	0	0	34	3	0	191	0	0	66	0	0	1	1	0	0	0	0	12	1	0	0	0	47	0	0	0	0	1	1	0	42	1	0	0	0	0	0	0	10	0	1	5	0	0
AE09	0	0	1	0	1	0	0	0	0	2	0	0	0	2	1	0	0	0	0	0	0	0	12	2	0	0	0	23	0	4	0	0	0	2	0	70	0	0	0	0	0	1	0	5	0	0	0	0	0
AE10	0	1	0	0	1	0	0	23	1	0	0	0	1	4	1	0	0	0	1	0	0	0	1	3	0	0	0	60	0	0	0	1	0	30	0	1	11	0	1	0	14	0	0	2	0	0	0	0	0
AE102	1	0	0	0	0	0	0	0	0	1	1	0	1	2	11	0	0	0	0	0	0	0	3	2	0	0	0	45	0	2	0	0	0	0	0	24	0	0	0	0	0	0	0	272	0	0	0	0	0
AE104	1	0	1	0	0	0	0	0	0	0	0	0	1	1	0	1	1	0	0	0	0	0	3	0	0	0	1	33	0	5	6	0	0	0	0	29	0	0	0	0	0	0	0	1	4	0	0	0	0
AE105	0	0	6	0	0	0	0	0	0	0	0	0	1	1	0	1	3	0	0	0	0	0	10	0	3	1	3	10	3	0	4	0	0	0	2	1	0	0	0	0	0	0	0	1	4	0	0	0	0
AE106	0	0	421	0	0	1	0	0	0	0	0	0	1	11	0	0	0	0	0	0	0	0	211	0	2	0	0	8	0	0	2	0	0	0	0	7	0	0	0	0	0	0	0	1	0	0	0	0	0
AE108	0	0	1	0	0	0	0	1	0	0	0	0	1	1	0	2	0	0	0	0	0	3	3	0	0	0	0	5	2	0	4	0	0	0	15	16	2	0	0	0	0	0	0	49	2	0	0	0	0
AE109	0	0	0	0	0	0	0	9	0	0	0	0	0	4	0	0	0	0	0	0	0	0	0	0	0	0	0	58	0	0	21	0	0	8	0	601	0	0	0	0	0	61	0	13	1	1	0	0	0
AE11	0	0	1	0	0	0	0	0	0	1	0	0	1	0	0	0	0	0	0	0	2	1	8	2	0	0	3	22	0	3	0	0	0	13	0	4	4	5	0	0	0	0	0	1	0	0	0	0	0
AE111	0	0	43	0	0	0	0	0	0	0	0	0	0	1	0	1	1	0	0	0	0	0	24	0	3	0	0	2966	0	0	5	0	0	1	0	6	2	0	0	0	0	1	0	7	4	2	0	0	1
AE112	0	0	6	0	0	0	0	0	0	0	0	0	1	5	0	3	0	0	0	0	1	0	6	0	1	0	0	3	0	4	14	0	0	0	0	0	0	0	0	0	0	3	0	0	3	0	0	0	0
AE113	0	0	0	0	0	0	0	0	0	0	0	0	0	1	0	0	0	0	0	0	0	0	26	0	0	0	2	6	0	0	12	0	0	0	0	1	0	0	0	26	0	4	0	0	2	0	0	0	0
AE114	0	0	6	0	0	1	0	0	0	0	0	0	1	2	0	0	0	0	0	0	0	0	32	0	0	0	0	13	0	2	11	0	0	0	0	8	0	0	0	0	0	2	0	5	6	0	0	0	0
AE115	2	0	0	0	0	0	0	0	0	0	0	0	0	1	0	0	0	0	0	1	0	0	47	0	21	0	4	13	0	0	2	0	0	0	0	6	2	0	0	0	1	0	0	4	1	0	0	0	0
AE117	0	0	9	0	0	0	0	0	0	0	0	0	2	1	0	0	0	0	0	0	2	0	7	0	0	0	0	228	0	0	22	0	2	1	0	0	0	0	0	0	0	0	0	1	1	0	0	0	0
AE118	0	0	6	0	0	0	0	0	0	0	0	0	1	2	0	0	0	0	0	0	0	0	15	0	2	0	12	309	1	1	14	0	0	0	0	1	3	0	0	0	0	1	0	0	2	0	0	0	0
AE119	0	0	5	0	0	0	0	0	0	0	1	0	0	2	0	2	4	0	0	0	1	0	8	0	0	0	1	372	0	0	4	0	0	1	0	3	0	0	0	0	0	0	0	1	2	0	0	0	0
AE120	0	0	0	0	0	0	0	0	0	0	0	0	0	2	0	0	0	0	0	0	0	0	4	0	0	0	30	218	0	0	1	0	0	1	0	2	0	0	0	0	0	0	0	33	0	0	0	0	0
AE122	0	0	19	0	0	0	0	0	0	0	0	0	2	2	0	0	0	0	0	1	1	0	12	0	1	0	0	47	0	5	20	0	1	0	0	1	10	0	0	0	0	0	0	0	2	0	0	0	0
AE123	1	0	30	0	0	0	0	0	0	0	0	0	2	2	0	0	25	0	0	0	0	0	15	0	0	0	0	278	0	0	0	0	0	0	0	2	0	0	0	0	0	1	0	0	1	0	0	0	0
AE124	0	0	7	0	0	0	0	0	0	0	0	0	0	1	0	0	0	0	0	0	0	0	8	0	0	0	0	549	0	0	0	0	0	2	0	0	0	0	0	0	0	11	0	5	0	0	0	0	0
AE125	0	0	0	0	0	1	0	0	0	0	0	0	0	5	0	0	0	1	0	0	0	0	22	0	0	0	0	5	0	0	4	0	0	0	0	0	0	0	0	0	0	0	0	28	2	0	0	0	0
AE127	0	0	54	0	0	1	0	0	0	0	0	0	0	1	0	46	0	0	0	0	0	0	126	0	0	0	109	308	0	1	3	0	3	0	0	4	0	0	0	0	0	1	0	36	0	0	0	0	0
AE128	1	0	0	0	0	0	0	0	0	0	0	0	0	10	0	0	0	0	0	0	0	0	18	0	1	0	0	322	0	21	1	0	0	0	0	0	5	0	0	0	0	0	0	27	1	0	0	0	0
AE129	0	0	1	0	0	0	0	1	0	0	6	0	0	2	0	0	0	0	0	0	0	0	41	0	0	0	0	356	0	0	6	0	0	1	0	3	0	0	0	0	0	0	0	4	0	0	0	0	0
AE13	0	2	3	0	0	0	0	0	0	0	1	0	0	0	0	3	0	0	0	0	0	0	1	0	0	0	0	57	0	0	4	0	1	4	0	1138	1	0	0	0	0	1	0	39	0	2	0	0	0
AE130	0	0	15	0	0	0	0	0	0	0	0	0	1	2	0	26	0	0	0	1	0	0	15	0	1	0	11	413	0	0	1	0	0	4	0	1	0	0	0	0	0	9	0	1	1	0	0	0	0
AE131	0	0	10	0	0	0	0	0	0	135	1	0	0	7	0	0	0	0	0	0	0	0	19	0	0	0	0	182	0	0	0	0	15	0	0	1	0	0	0	0	0	0	0	0	0	0	0	0	0
AE133	2	0	36	0	0	0	0	5	1	0	0	0	1	1	0	0	0	0	0	0	0	0	58	0	3	0	3	246	0	0	2	0	0	0	0	2	0	0	0	0	0	1	0	0	2	0	0	0	0
AE134	0	0	24	0	0	0	0	0	0	0	0	0	1	0	0	0	0	0	0	0	0	0	5	0	2	0	0	247	0	0	21	0	0	1	1	0	1	0	0	0	0	0	0	0	1	0	0	0	0
AE135	0	0	222	30	0	0	0	0	0	0	0	0	0	7	0	0	0	0	0	0	0	0	43	0	0	0	0	303	0	0	2	0	0	0	0	1	0	0	0	20	0	13	0	0	2	0	0	0	0
AE136	0	0	5	0	0	7	0	0	0	2	0	0	1	1	0	0	0	0	0	0	1	0	14	0	1	0	1	174	0	0	4	0	1	0	0	0	3	0	0	0	0	0	0	1	3	0	0	0	0
AE137	1	0	10	0	0	1	0	0	0	0	0	0	0	1	0	7	0	0	0	0	2	0	9	0	0	0	8	308	0	0	6	0	1	0	0	1	0	0	0	0	0	3	0	0	3	0	0	0	0
AE139	0	0	0	0	0	0	0	0	0	0	0	0	1	2	0	0	1	0	0	0	0	0	7	0	0	0	0	370	0	5	2	0	1	0	0	0	0	0	0	0	0	1	0	0	1	0	0	0	0
AE14	0	0	0	0	0	6	0	1	0	2	3	0	0	0	0	0	0	0	0	0	1	0	5	1	0	0	0	47	0	1	0	2	0	3	0	33	2	0	2	1	0	0	0	4664	0	0	0	0	0
AE143	0	0	73	0	0	0	0	0	0	3	0	0	3	16	0	1	1	0	0	1	0	0	0	0	1	0	0	95	0	87	5	0	0	0	0	2	0	0	0	0	0	0	0	1	1	0	0	0	0
AE144	2	0	3	0	0	0	0	0	0	0	0	0	1	2	0	0	0	0	0	0	0	0	7	0	2	0	0	314	0	0	7	0	0	1	0	2	0	0	0	0	0	0	0	1	2	0	0	0	0
AE145	1	0	6	0	0	1	0	0	0	0	0	0	0	5	0	2	0	0	0	0	0	0	5	0	1	0	0	165	0	0	2	0	1	3	0	6	0	0	0	0	0	0	0	1	0	0	0	0	0
AE146	0	0	1	0	0	0	0	0	0	0	7	0	0	3	0	10	4	0	0	0	0	0	17	0	2	0	0	346	1	0	6	0	0	0	0	1	0	0	0	0	0	0	0	3	1	0	0	0	0
AE147	0	0	1	0	0	0	0	3	0	0	0	0	5	5	0	0	0	0	0	0	0	0	2	0	0	0	0	331	0	0	7	0	0	0	0	2	0	0	0	0	0	38	0	0	2	0	0	0	0
AE149	0	0	5	0	0	0	0	3	0	1	0	0	5	1	0	3	0	0	0	0	0	0	0	0	1	0	0	8	3	1	1	0	0	0	0	0	0	0	0	0	0	8	0	0	1	0	0	0	0
AE15	0	0	4	0	0	0	0	0	0	2	0	0	2	0	1	0	0	0	0	0	0	0	4	1	1	0	0	122	0	3	0	0	0	18	0	3	3	0	1	0	0	0	1	6	0	0	0	0	0
AE150	1	0	18	0	0	0	0	0	0	0	0	0	1	6	0	18	0	0	0	1	1	0	42	0	0	0	2	28	1	0	2	0	0	0	0	0	0	0	0	0	0	14	0	4	1	0	0	0	0
AE151	0	0	50	0	0	1	0	1	0	0	0	0	1	23	0	0	0	0	0	0	0	0	96	0	1	1	17	4	0	0	7	0	0	0	0	2	1	0	0	0	1	0	0	8	1	0	0	0	0
AE152	1	0	0	0	0	0	0	0	0	2	0	0	0	0	1	0	2	0	0	0	0	0	13	0	0	0	2	4	0	4	1	0	0	0	0	0	0	0	0	0	0	0	0	0	0	0	0	0	0
AE153	34	0	0	0	1	0	0	0	0	197	0	0	0	4	0	3	1	0	0	0	0	0	14	0	0	0	0	68	0	0	7	0	0	0	0	0	4	0	0	0	0	0	0	0	0	0	0	0	0
AE154	2	0	0	0	0	0	2	1	0	1905	2	0	0	1	0	0	0	0	0	0	0	0	0	0	0	0	0	286	0	5	0	0	0	0	0	0	0	0	1	0	0	0	0	1	0	0	0	0	0
AE156	1	0	0	0	0	0	0	0	0	0	0	0	0	71	6	0	43	0	0	0	0	0	75	0	0	0	0	6	0	0	0	0	0	0	0	12	0	0	0	0	0	1	0	33	0	0	0	0	0
AE157	1	0	0	0	0	0	0	0	0	4	0	0	0	3	0	0	0	0	0	0	0	0	18	0	1	0	0	91	0	0	0	0	0	0	0	1	0	3	0	0	0	0	0	0	1	0	0	0	0
AE158	1	0	0	0	0	0	0	0	0	0	0	0	0	1	0	3	0	0	0	0	0	0	4	0	0	0	2	518	0	1	2	0	0	0	0	3	0	0	0	0	0	0	0	1	0	0	0	0	0
AE159	0	0	0	0	0	0	0	0	0	1	106	0	2	23	1	40	0	0	0	0	0	0	30	0	1	0	0	384	0	39	1	0	0	1	0	1	0	0	2	0	0	0	0	1	0	0	0	0	0
AE16	0	0	1	0	0	0	0	0	1	0	0	0	26	4	0	0	0	0	2	0	0	0	143	1	5	0	0	87	0	10	1	0	1	2	0	12	1	0	1	0	0	13	0	2	0	1	0	0	0
AE160	0	0	0	0	0	0	0	0	0	0	9634	0	15	3	7	21	1	0	2	0	0	0	25	0	0	0	0	6	0	142	22	0	0	0	0	2	0	24	0	0	0	0	0	1	0	0	0	0	0
AE161	1	0	28	0	0	0	0	0	0	1	16	0	0	0	194	0	0	0	0	0	0	0	11	0	0	0	0	33	0	0	2	0	0	0	0	1	0	0	0	0	0	0	0	10	0	0	0	0	0
AE162	0	0	0	0	0	0	0	0	0	65	0	0	0	0	11	0	0	0	0	0	0	0	2	0	0	0	0	238	0	0	0	0	0	0	0	1	0	0	0	0	0	0	0	2	0	0	0	0	0
AE163	0	0	0	0	1	0	0	0	0	4	0	0	0	1	1	0	0	0	0	0	0	0	11	0	2	0	7	26	0	0	0	0	0	0	0	0	0	0	0	0	0	0	0	0	0	0	0	0	0
AE164	1	0	0	0	0	0	0	0	0	1	0	0	0	0	0	0	0	0	0	0	0	0	1	0	0	0	0	295	0	2	0	0	0	1	0	1	1	0	0	0	0	0	0	0	0	0	0	0	0
AE165	1	0	1	0	0	0	0	0	0	0	1	0	0	15	0	0	0	0	0	0	0	0	84	0	0	0	0	207	0	0	0	0	26	1	0	1	0	0	0	0	0	0	0	6	0	0	0	0	0
AE166	0	0	9	1	0	0	1	0	0	5	5	0	0	2	0	0	0	0	0	0	0	0	6	0	0	1	0	304	0	0	0	0	0	0	0	0	0	0	0	0	0	0	0	4	0	0	0	0	0
AE167	0	0	2	0	0	0	0	0	0	119	1	0	0	1	0	0	0	0	0	0	0	0	0	0	1	0	0	250	0	0	0	0	0	0	0	2	0	0	0	0	0	0	0	1	0	0	0	0	0
AE168	0	0	4	0	0	0	0	0	0	0	1	0	1	2	0	2	0	0	0	0	0	0	8	0	0	1	0	245	0	7	0	0	0	0	0	1	0	0	0	0	0	1	0	6	0	0	0	0	0
AE169	0	0	1	0	0	0	1	0	0	0	2	0	0	0	1	2	0	0	0	0	0	0	5	0	0	0	0	205	0	2	0	0	0	1	0	1	4	0	0	0	0	0	0	4	0	0	0	0	0
AE17	3	0	0	0	0	0	0	0	0	1	0	0	0	151	0	0	3	0	0	0	0	1	7	0	0	0	0	29	0	2	2	0	0	1	0	10	2	0	0	0	0	1	0	5	0	0	0	0	0
AE170	9	0	0	0	0	0	0	0	0	0	2	0	0	6	0	2	0	0	0	0	0	0	6	0	0	0	9	10	0	16	0	0	0	0	0	2	0	0	0	0	0	0	0	3	0	0	0	0	0
AE171	0	0	0	0	0	0	0	0	0	1	2	0	0	0	0	0	0	0	0	0	0	0	0	0	1	1	0	197	0	0	3	0	0	0	0	1	0	0	0	0	0	0	0	0	0	0	0	0	0
AE173	1	0	0	0	0	0	0	0	0	0	0	0	0	0	0	136	0	0	0	0	0	0	259	0	0	0	0	4	0	0	0	0	0	0	0	2	0	0	0	0	0	0	0	95	0	0	0	0	0
AE174	0	0	7	0	0	0	0	0	0	0	2	0	0	1	0	0	0	0	0	0	0	0	0	0	0	0	0	307	0	0	3	0	1	0	0	2	0	3	0	0	0	0	0	1	0	0	0	0	0
AE175	0	0	0	0	104	2	1	0	0	1	0	0	0	0	0	0	1	0	0	0	0	0	0	0	0	0	0	272	0	0	2	0	0	1	0	0	0	0	0	0	0	0	0	0	0	0	0	0	0
AE176	1	0	0	0	0	0	0	0	0	2	0	0	1	2	0	0	0	0	0	1	1	0	7	0	0	0	1	328	0	3	3	0	2	0	0	1	0	0	0	0	0	0	0	7	6	0	0	0	0
AE177	0	0	15	0	0	1	0	0	0	6	0	0	0	0	0	0	0	0	0	1	0	0	5	0	0	0	0	273	0	0	0	0	0	0	0	1	0	0	0	0	0	0	0	14	0	0	0	0	0
AE178	1	0	27	0	0	2	0	0	0	2464	0	5	1	0	0	1	0	0	0	2	0	0	18	0	1	0	0	15	0	0	1	0	0	10	0	9	2	0	0	0	0	0	0	11	0	0	0	0	1
AE18	1	0	0	0	0	1	0	0	0	2	0	0	0	0	0	1	0	0	0	0	0	0	1	0	0	0	1	2	0	0	0	0	0	0	0	0	0	0	0	0	0	0	0	0	0	0	0	0	0
AE19	3	0	0	0	0	0	0	0	0	2	1	0	0	0	0	0	4	5	0	0	0	0	2	0	70	0	0	8	0	1	3	0	0	0	0	5	0	0	2	0	0	0	0	2	0	3	0	0	0
AE20	0	0	0	0	2	0	0	0	0	1	0	0	0	0	0	0	0	0	0	0	0	0	0	0	0	0	0	81	0	0	0	0	0	1	0	0	0	0	0	0	0	5	0	0	0	0	0	0	0
AE21	2	0	0	0	0	0	0	5	0	0	5	0	1	5	0	6	3	0	1	0	0	0	2	0	0	0	0	149	0	6	0	0	0	1	0	2	0	3	0	0	0	3	0	2	0	0	0	0	0
AE24	1	0	2	0	0	0	0	0	0	0	0	0	0	2	0	0	0	0	0	0	0	0	6	0	0	0	0	143	0	1	0	0	0	1	0	1	0	0	0	0	0	0	0	1	0	0	0	0	0
AE25	0	1	7	0	0	0	0	0	0	6	0	0	0	3	0	0	0	0	0	0	0	0	8	0	0	0	0	169	0	1	1	0	0	9	1	9	0	0	0	0	0	0	0	2	0	0	0	0	0
AE28	0	1	1	0	0	0	0	0	1	2	2	0	1	115	0	1	0	0	0	0	0	0	1	0	0	0	0	13	0	0	0	0	0	1	3	96	0	0	0	0	0	1	1	9	1	0	0	0	0
AE29	0	0	0	0	0	0	0	1	0	7	2	0	0	190	0	1	0	0	0	0	0	0	3	0	0	0	0	31	0	0	0	0	0	1	2	9	0	0	0	0	0	3	3	6	0	0	0	0	0
AE30	0	0	0	0	0	0	0	1	0	4	0	0	0	0	0	0	0	0	0	0	0	0	2	0	0	0	0	170	0	0	0	1	0	2	2	5	0	0	0	1	0	1	0	0	0	0	0	0	0
AE31	0	0	0	0	1	0	0	0	0	3	0	0	0	0	0	0	0	0	0	0	0	0	3	0	0	1	0	78	0	4	2	0	0	24	4	0	0	0	0	0	0	0	1	0	0	0	0	1	0
AE32	0	2	1	4	2	0	0	0	0	3	0	0	1	0	0	0	0	0	0	1	2	0	7	0	1	0	0	30	0	0	20	0	0	7	2	8	4	0	0	6	0	1	1	1	0	0	0	0	0
AE33	0	0	1	0	0	0	0	0	0	2	0	0	1	175	3	0	0	0	0	0	0	0	17	0	12	0	0	14	0	0	17	0	0	0	2	10	0	0	0	0	0	2	2	4	0	0	1	1	0
AE34	1	0	0	0	0	0	0	0	0	4	0	0	0	0	3	1	0	0	0	0	0	0	3	0	0	0	0	156	0	0	0	0	0	1	3	1	0	0	0	0	0	1	0	1	0	0	0	1	0
AE35	0	0	1	0	2	1	0	1	0	3	0	0	0	4	4	3	0	0	0	0	0	0	3	0	0	1	0	131	0	0	0	0	0	0	1	9	0	0	0	0	0	6	0	5	0	1	0	0	0
AE36	0	0	0	0	0	0	0	2	0	3	1	0	0	2	0	0	0	0	0	0	0	1	7	0	0	0	0	10	0	0	1	0	0	2	5	3	0	0	0	0	0	0	1	1	0	0	0	0	0
AE37	0	0	0	0	0	0	0	0	0	2	0	0	1	1	1	2	0	0	0	0	0	0	2	0	0	0	1	164	0	3	0	0	0	13	3	2	0	0	0	1	0	2	0	1	0	1	0	0	0
AE38	1	1	0	0	1	0	0	0	0	5	3	0	0	2	3	1	0	0	0	0	0	0	6	0	0	0	0	41	0	3	0	0	0	0	0	12	0	0	0	0	0	5	0	6	0	0	0	0	0
AE39	0	2	0	0	1	1	0	1	0	8	1	0	0	3	4	2	0	0	0	0	0	0	16	0	0	0	0	87	0	0	12	0	0	2	1	10	0	0	0	0	0	0	1	4	0	0	0	0	0
AE40	1	0	0	0	2	0	0	0	0	1	0	0	1	2	0	0	0	0	0	0	0	0	0	0	0	0	0	136	0	1	2	0	0	2	3	1	1	0	0	0	0	3	1	1	0	0	0	0	0
AE41	0	1	0	0	0	0	0	0	0	4	1	0	1	441	0	0	3	0	0	0	0	0	7	0	0	2	0	120	0	2	2	0	0	0	0	1	6	0	0	0	0	1	0	1	0	0	0	0	0
AE42	0	1	1	0	0	0	0	0	0	8	3	0	0	4	0	0	1	0	0	0	0	0	4	0	2	0	0	172	0	0	1	2	0	3	3	5	0	0	0	0	0	1	1	4	0	0	0	2	0
AE43	0	62	0	0	1	1	0	1	0	6	1	0	1	2	0	1	0	0	0	1	0	0	3	0	40	0	0	110	0	1	1	0	0	5	1	9	0	0	0	0	0	0	1	3	0	0	0	0	0
AE44	0	285	2	0	0	1	0	1	0	4	328	0	0	36	1	0	0	0	0	0	0	0	4	0	0	1	0	202	0	0	4	0	0	8	2	11	0	0	0	0	0	1	0	135	0	0	0	0	0
AE45	0	0	2	0	0	2	0	0	0	5	14	0	0	2	1	1	0	0	0	0	0	0	7	0	1	0	0	84	0	0	0	0	0	9	1	28	0	0	0	0	0	0	2	14	0	0	0	0	0
AE46	0	0	0	0	0	0	0	0	0	4	0	0	4	1	2	0	1	0	0	0	0	0	4	0	0	0	0	63	0	0	1	0	0	8	1	10	0	0	0	0	0	7	2	5	0	0	0	0	1
AE47	0	59	0	0	1	0	0	7	0	5	0	0	1	0	0	1	0	0	0	0	0	0	4	0	0	0	0	44	0	3	0	0	0	4	2	84	0	0	0	0	0	72	1	22	0	0	0	0	0
AE48	0	0	1	0	1	0	0	0	0	2	0	0	0	13	1	1	0	0	0	0	0	0	9	0	0	0	0	123	0	0	0	0	0	0	1	9	0	0	0	0	0	3	0	10	0	0	0	0	0
AE49	0	0	0	0	0	0	0	0	0	1	0	0	0	0	0	0	0	0	0	0	0	0	3	5	0	0	0	85	0	1	0	2	0	8	0	20	0	0	1	0	0	0	0	2	0	2	0	0	0
AE51	1	0	0	0	0	0	0	0	0	0	0	0	0	0	0	0	0	0	1	0	0	0	4	0	0	0	0	65	0	0	0	122	0	9	0	465	1	0	0	0	0	0	0	77	0	0	0	0	0
AE53	0	9	2	0	1	0	0	0	0	1	0	0	0	28	4	3	0	0	0	0	0	0	3	3	0	1	0	115	0	0	0	0	1	1	0	3	0	0	1	0	0	0	0	0	0	2	0	0	0
AE54	0	1	3	0	0	0	0	0	1	4	0	0	1	3	1	9	2	0	0	0	0	0	3	0	0	0	0	92	0	4	0	0	0	7	0	15	1	0	0	2	0	0	0	3	0	1	0	0	0
AE55	0	5	5	0	1	0	1	0	0	0	0	0	0	0	0	0	3	0	0	0	0	0	7	1	3	0	4	36	0	7	0	0	0	7	0	24	10	0	0	0	0	7	0	5	0	0	0	0	0
AE56	0	0	9	2	1	0	0	0	0	1	1	0	0	6	1	0	0	0	0	0	0	0	13	6	0	1	0	62	0	3	4	0	0	4	0	20	1	0	0	0	0	23	0	7	0	1	0	0	0
AE57	0	0	0	0	1	1	0	0	0	1	0	0	0	0	1	6	0	0	0	0	0	0	8	5	0	0	0	36	0	6	0	0	1	2	0	9	0	0	1	0	0	0	0	0	0	1	0	0	0
AE58	0	0	0	0	0	0	0	0	0	0	1	0	0	8	0	0	0	0	1	0	0	0	0	2	0	1	0	24	0	9	8	0	0	3	0	6	3	0	0	0	0	1	0	7	0	3	0	0	0
AE59	0	1	11	0	0	0	0	0	0	1	1	0	1	125	1	4	0	0	0	0	0	0	15	1	1	0	0	171	0	1	0	0	1	0	0	2	3	0	0	14	0	0	0	4	0	1	0	0	0
AE60	0	0	0	0	0	0	0	0	0	0	0	0	1	0	0	5	0	0	0	0	0	0	2	3	0	0	3	237	0	1	3	0	4	13	0	7	2	0	0	1	0	0	0	3	0	1	0	0	0
AE61	0	2	6	0	0	0	0	0	0	1	0	0	0	55	0	0	0	0	0	0	0	0	0	3	0	0	0	128	0	4	1	0	0	7	0	92	0	0	0	0	0	1	0	2	0	1	0	0	0
AE62	0	35	0	0	0	1	0	0	0	1	3	0	0	1	0	3	0	0	0	0	0	0	6	6	0	0	0	26	0	0	0	0	0	6	0	21	0	0	6	0	0	0	0	5	0	0	0	0	0
AE63	0	0	0	0	0	0	0	11	0	3	0	0	1	0	0	0	0	0	0	0	0	0	25	4	0	0	0	416	0	0	0	0	0	29	0	5	0	0	0	0	0	1	1	0	0	0	0	0	0
AE64	0	0	1	0	1	0	0	0	0	2	0	0	6	1	0	0	0	0	0	0	0	0	4	5	0	0	0	21	0	8	0	0	0	0	0	15	9	0	0	0	0	0	0	15	0	4	0	0	0
AE65	0	2	0	0	0	0	0	0	0	0	2	0	1	2	0	0	0	0	0	0	0	0	8	0	0	0	0	288	0	0	0	0	0	29	0	18	0	0	0	0	0	0	1	3	0	0	0	0	0
AE66	0	0	1	0	2	0	0	0	0	2	2	0	4	1	0	0	4	0	0	0	0	0	14	0	0	0	0	37	0	0	0	0	0	3	0	16	0	0	0	0	0	6	0	2	0	0	0	0	0
AE67	7	0	7	0	0	0	0	2	0	2	0	0	1	0	0	0	0	0	0	0	0	2	14	0	1	0	0	28	0	9	1	0	0	1	0	13	1	0	0	0	0	0	0	2	0	3	0	0	0
AE68	0	0	0	0	0	0	0	1	0	0	0	0	2	1	0	3	1	1	0	0	0	0	0	0	0	0	0	7	0	0	1	0	0	0	0	4	0	0	0	0	0	2	0	4	0	1	0	0	0
AE69	1	0	0	0	0	0	0	0	0	5	0	0	0	0	0	0	0	2	0	0	0	0	1	0	0	0	0	66	0	0	0	0	0	10	0	566	0	0	0	0	0	0	0	41	0	0	0	0	0
AE70	2	0	1	0	0	0	0	0	0	3	1	0	1	0	0	1	1	1	0	0	0	0	4	0	0	0	0	61	0	0	2	0	0	4	0	79	0	0	0	0	0	0	0	8	0	0	0	0	0
AE71	0	0	0	0	0	0	0	0	0	1	0	0	1	0	0	0	0	1	0	0	2	0	0	0	0	0	0	102	2	3	0	0	0	0	0	25	0	0	0	0	0	2	0	19	0	0	0	0	0
AE72	1	0	1	0	0	0	0	0	0	7	0	0	0	2	0	0	0	0	0	0	1	2	5	0	0	0	0	57	0	6	0	0	0	18	0	1107	0	0	0	0	0	0	0	5	0	0	0	0	0
AE73	0	1	9	0	1	0	0	0	0	82	0	0	0	64	0	0	0	0	0	0	0	0	6	2	0	0	12	35	0	0	0	0	0	1	0	103	0	0	0	0	0	10	0	5	0	0	0	0	0
AE74	0	1	30	0	2	1	0	0	0	3	0	0	0	0	0	0	0	0	0	0	0	0	14	1	0	0	0	16	0	0	3	0	0	5	0	739	0	0	0	0	0	2	0	113	0	0	0	0	0
AE76	0	2	5	0	0	0	0	0	0	2	2	0	0	92	0	13	1	0	1	0	0	0	59	1	0	0	0	18	0	3	0	0	0	3	0	950	0	0	0	0	0	0	0	33	0	0	0	0	0
AE77	0	0	10	0	0	0	0	0	0	2	30	0	0	117	0	6	0	0	0	0	0	0	30	0	0	0	0	105	0	34	0	0	0	2	0	1277	0	0	0	0	0	0	0	29	0	0	0	0	0
AE78	0	0	84	0	0	0	0	0	0	1	596	0	2	0	1	0	1	0	0	0	0	0	31	1	0	0	0	98	0	0	3	0	0	13	0	8	0	0	0	0	0	0	0	5	0	0	0	0	0
AE79	0	1	4	0	0	1	0	0	0	0	1	0	0	0	0	1	0	0	1	0	0	0	0	0	0	0	0	325	0	0	2	0	0	3	0	1513	0	0	0	0	0	0	0	9	0	103	0	0	0
AE80	0	0	5	0	0	1	0	0	0	2	0	0	0	1	19	1	0	0	0	0	0	0	9	0	0	0	1	51	0	0	2	0	0	24	0	42	0	0	0	0	0	5	0	10	0	1	0	0	0
AE81	0	2	2	0	0	0	0	13	0	0	0	0	0	2	1	0	0	0	0	0	0	0	10	0	0	0	0	191	0	0	2	0	0	3	0	24	0	0	0	0	0	132	0	8	0	0	0	0	0
AE82	0	1	16	0	1	2	0	0	0	1	0	0	0	1	0	3	1	0	0	0	0	0	10	1	0	0	1	525	0	0	11	0	0	16	0	7	0	0	0	0	0	1	0	23	0	0	0	0	0
AE83	0	0	3	0	0	3	0	0	0	33	1	0	0	0	62	28	0	0	0	0	0	0	9	2	8	0	4	142	3	0	0	0	3	0	1	47	0	0	0	0	0	11	0	51	0	0	0	0	0
AE84	0	2	6	0	0	0	0	0	0	293	1	0	0	0	0	0	1	0	0	0	0	0	19	0	0	0	1	213	0	0	1	0	2	1	0	225	0	0	0	0	0	0	0	273	0	1	0	0	0
AE85	0	0	3	0	1	0	0	0	0	25	2	0	0	0	0	0	0	0	0	0	0	0	12	1	31	0	21	92	0	0	0	0	0	7	0	486	0	0	0	0	0	0	0	27	0	0	0	0	0
AE86	0	1	3	0	0	0	0	0	0	0	1	0	0	1	0	0	0	0	0	0	0	0	9	1	0	0	0	278	0	0	7	0	0	2	0	1685	0	0	0	0	0	0	0	38	0	0	0	0	0
AE87	0	0	2	0	0	2	0	0	0	1	0	0	0	0	0	7	0	0	0	0	0	0	5	0	1	0	0	54	0	1	1	0	0	24	0	18	0	0	0	0	0	0	0	6	0	36	0	0	0
AE88	0	1	8	0	0	0	0	0	0	2	0	0	0	1	22	0	0	0	1	0	0	0	8	0	1	0	5	13	0	0	0	0	0	1	0	21	1	0	0	0	0	0	0	78	0	0	0	0	0
AE89	0	1	4	0	0	1	0	1	0	0	0	0	0	1	36	2	0	0	0	0	1	0	6	0	0	0	0	36	0	0	0	0	0	5	0	38	0	0	0	0	0	7	0	2741	0	0	0	0	0
AE90	0	0	17	0	0	0	0	0	0	1	1	0	0	7	3	23	0	0	0	0	0	0	32	1	0	0	1	45	0	3	1	0	0	4	0	259	0	0	0	0	0	7	0	930	0	0	0	0	0
AE91	0	0	0	0	0	0	0	0	0	7	1	0	0	5	0	0	1	0	1	0	0	0	14	0	0	0	0	243	0	0	0	0	1	2	0	1814	0	0	0	0	0	0	0	11	0	0	0	0	0
AE94	0	1	0	0	0	0	0	0	0	2	3	0	0	0	0	1	0	0	0	0	0	0	1	0	0	0	0	174	0	0	0	0	2	3	0	243	0	0	0	0	0	0	0	6	0	0	0	0	0
AE96	0	1	24	0	0	0	0	0	0	0	1	0	0	0	0	0	0	0	0	0	0	0	3	1	0	0	0	72	0	1	0	0	0	22	0	14	0	0	0	0	0	0	0	4	0	0	0	0	0
AE99	0	0	4	0	0	0	0	0	0	0	0	0	2	85	4	1	0	0	0	0	0	0	4	0	0	0	0	127	0	0	0	0	0	2	0	1948	0	0	0	0	0	0	0	47	2	0	0	0	0
BB02	1	3	17	0	0	0	0	0	0	3	1	0	52	26	0	0	3	0	1	0	2	0	100	2	0	1	61	140	0	0	71	1	0	1	0	6	49	0	0	0	0	38	0	60	0	7	0	0	0
BB04	0	1	19	0	0	0	0	0	0	2	2	0	0	5	1	6	2	0	0	0	0	0	12	1	0	0	12	283	0	0	0	0	0	0	0	3	4	0	0	0	0	0	0	5	0	3	0	0	0
BB05	0	2	11	0	0	0	0	0	0	2	1	0	0	1	0	0	1	0	0	0	3	0	7	0	0	0	1	498	0	0	0	0	0	0	0	9	0	0	0	0	0	1	0	3	0	2	0	0	0
BB06	0	1	11	0	22	0	0	0	0	18	2	0	0	1	0	0	1	0	0	0	1	0	7	0	0	0	1	55	0	12	0	1	6	7	0	9	3	0	0	0	0	0	0	13	0	48	0	0	0
BB07	0	1	25	0	0	0	0	0	0	1369	2	0	0	1	0	0	1	0	1	1	0	0	3	4	0	0	0	172	0	0	0	0	0	1	0	9	0	0	0	0	0	0	0	12	0	3	0	0	0
BB08	0	1	7	0	0	0	0	0	0	12	0	0	0	2	0	0	5	0	0	0	0	0	15	1	0	1	0	31	0	0	4	1	0	0	0	1	0	0	0	0	0	4	0	0	2	12	0	0	0
BB09	0	1	19	0	0	0	0	0	0	2	2	0	0	4	1	0	2	0	1	0	1	0	3	1	0	0	0	217	0	0	0	0	0	1	0	262	5	0	0	1	0	5	0	16	0	1	0	0	0
BB10	0	0	8	0	0	0	0	1	0	1	1	0	0	26	0	18	2	0	1	0	0	0	141	0	2	0	0	568	0	150	0	1	1	2	3	39	0	0	0	0	0	5	0	11	0	1	0	0	0
BB11	0	2	32	0	0	0	0	0	1	6	2	0	0	1	0	3	2	0	0	0	0	0	14	1	0	0	0	1712	0	6	1	0	0	1	0	2	0	0	0	0	0	0	0	8	0	2	0	0	0
BB12	0	0	28	0	0	1	0	0	0	6	8	0	1	6	0	10	2	0	0	0	0	0	11	0	1	0	0	345	0	1	5	2	1	16	0	179	0	0	0	0	0	1	0	12	0	2	0	0	0
BB14	0	2	16	0	0	1	0	0	0	2	1	1	0	0	1	8	1	0	0	1	0	2	11	1	0	0	0	79	0	12	1	0	0	13	0	5	0	0	0	3	0	0	0	9	0	1	0	0	0
BB15	1	0	13	0	0	1	0	0	0	10	2	0	0	2	0	1	0	1	0	0	1	0	4	1	0	0	0	309	0	1	0	0	0	1	0	7	0	0	0	0	0	1	0	12	0	10	0	0	0
BB16	0	0	23	0	0	0	0	0	0	2	4	0	1	5	1	8	0	0	1	0	6	7	10	1	0	0	0	9030	0	10	0	0	0	30	0	7	0	0	0	0	2	0	0	3	0	0	0	0	0
BB17	0	0	7	0	0	0	0	0	0	0	0	0	0	6	0	0	4	0	0	0	0	0	27	0	0	0	1	51	0	0	10	0	0	21	0	1	0	0	0	0	0	1	0	0	0	0	0	0	0
BB18	0	0	13	0	0	0	0	1	0	1	1	0	0	0	0	0	0	0	0	0	0	0	3	0	0	0	1	4	0	2	0	0	0	0	0	0	1	0	0	0	0	0	0	0	0	0	0	0	0
BB20	0	0	12	0	0	1	0	3	0	8	0	0	0	1	0	0	1	0	0	0	0	0	0	0	0	0	0	65	0	5	0	0	0	16	0	0	0	0	0	0	0	1	0	0	0	1	0	0	0
BB21	0	0	9	0	0	0	0	1	0	2739	0	0	0	1	0	0	0	0	0	0	0	0	11	0	1	0	0	5	0	2	0	0	0	0	0	19	2	0	0	0	0	0	0	0	0	0	0	0	0
BB23	0	0	14	0	0	0	0	1	0	2	1201	0	0	2	1	2	0	0	0	0	0	0	6	0	0	0	0	19	0	1	0	0	0	7	0	2	0	0	0	0	0	1	0	0	0	0	0	0	0
BB24	0	0	10	0	0	0	0	0	0	1	9	0	0	4	0	0	0	0	0	0	0	0	2	0	0	0	0	360	0	8	1	0	0	0	0	1	0	0	0	0	0	0	0	2	0	0	0	0	0
BB25	0	0	11	0	0	0	0	0	0	0	1	0	0	1	0	0	0	0	0	0	0	0	8	0	2	0	0	41	1	3	1	0	0	20	0	3	9	0	0	0	0	0	0	3	0	0	0	0	0
BB26	0	0	10	0	0	0	0	0	0	1	2	0	0	1	0	1	0	0	0	0	0	0	10	0	0	0	0	2	0	0	0	0	4	0	0	7	0	0	0	0	0	0	0	2	0	0	0	0	0
BB33	0	0	12	0	0	0	0	1	0	1	1	0	0	0	0	4	0	0	0	0	0	0	28	0	0	0	0	21	0	2	2	0	0	14	0	3	0	0	0	0	0	1	0	3	0	0	1	0	0
BB34	0	0	6	0	4	0	0	1781	124	5	1	0	1	2	0	0	0	0	0	6	0	0	52	0	0	0	3	6	25	0	9	0	0	0	0	1	12	0	0	0	0	1	0	11	0	1	306	0	0
BB36	1	0	166	0	0	0	0	0	0	1	1	0	0	0	0	0	0	0	0	0	0	0	411	0	0	0	0	3	0	0	68	0	1	0	0	5	0	0	0	0	0	0	0	182	0	0	0	0	0
BB37	0	0	7	0	0	0	0	0	0	0	1	0	0	1	0	0	0	0	0	0	0	0	16	0	0	0	0	2	1	3	0	0	0	1	0	40	0	0	0	0	0	0	0	6017	0	28	0	0	0
BB38	0	0	7	0	0	0	0	0	0	5	0	0	1	0	0	0	0	0	0	0	0	17	46	0	0	0	0	6	0	0	1	0	0	0	0	0	0	0	0	0	0	1	1	2	0	0	0	0	0
BB39	0	0	3	0	0	0	0	1	0	2	5067	0	1	0	0	0	0	0	0	0	0	0	5	0	1194	1	0	3	0	0	0	0	0	0	0	0	0	0	0	0	0	0	2	2	0	0	0	0	0
BB43	0	0	71	0	0	37	0	0	0	2	0	2	0	2	0	0	0	0	0	0	0	0	0	0	2	0	0	105	0	0	29	0	0	0	0	7	46	0	0	0	0	0	0	62	0	0	0	0	0
BB44	0	0	4	0	1	3	0	0	0	1	0	1	0	0	0	1	0	0	0	0	0	0	4	0	1	0	0	300	0	0	0	0	1	0	0	18	1	0	1	0	0	0	0	6	0	2	0	0	0
BB45	0	0	15	0	0	0	0	0	0	0	0	0	1	0	0	44	0	0	0	0	0	0	219	0	0	0	1	3	0	1	18	0	216	0	0	6	1	0	0	0	0	0	0	2	0	0	0	0	0
BB46	0	1	230	0	0	2	1	0	0	0	0	1	0	2	0	0	0	0	0	0	0	0	472	0	0	0	0	1	0	189	0	0	0	1	2	16	79	0	0	0	0	0	0	4	0	0	0	0	0
BB47	0	0	10	0	0	0	0	0	0	0	287	2	0	53	0	0	0	0	0	0	0	21	464	0	117	0	0	3	0	0	36	0	8	0	0	10	1	0	0	0	0	1	0	5	0	0	0	0	0
BB48	0	0	28	0	0	0	0	4	0	3	0	0	0	2	0	23	0	0	0	0	0	0	48	0	2	0	0	15	2	14	5	0	0	0	0	1	1	0	2	0	0	12	0	2	0	0	0	0	0
BB49	0	0	0	0	0	1	0	0	0	0	0	0	1	8	0	0	0	1	0	0	0	0	156	0	0	0	0	9	0	2	37	40	1	1	0	4	76	0	0	0	0	1	1	96	0	0	0	0	0
BB50	0	0	10	0	0	0	0	0	0	3	1	0	0	6	0	12	0	0	0	0	0	0	1	0	0	0	0	9	0	0	0	0	0	0	0	3	0	0	0	0	0	0	1	102	0	0	0	0	0
BB51	0	0	0	0	0	0	0	0	0	0	0	0	0	0	0	1	0	0	0	0	0	0	4	0	0	0	0	8	0	0	6	0	0	0	0	84	0	0	0	0	0	0	0	6853	0	0	0	0	0
BB53	0	0	0	0	0	0	0	0	0	0	2	0	0	0	0	0	0	0	0	0	0	0	0	0	0	0	0	21	0	0	2	0	0	0	0	1	0	0	0	0	0	0	0	0	0	0	0	0	0
BB54	2	0	0	0	7	0	0	0	0	2	3	0	0	0	0	0	0	0	0	0	1	0	2	0	0	1	0	194	0	5	0	0	0	2	0	18	0	0	0	0	0	0	1	3	0	0	0	0	0
BB55	0	0	0	0	0	0	0	0	62	2	1	0	12	0	0	0	502	0	0	0	0	0	6	0	0	0	0	3	0	0	0	0	0	0	0	2	0	0	0	0	0	0	1	0	0	1	0	0	0
BB56	0	0	0	0	0	200	0	0	0	7	1	0	0	0	1	0	1	0	0	0	161	0	246	0	0	0	0	6	0	2	0	0	0	0	0	18	0	0	0	0	0	25	0	1	0	0	0	0	0
BB59	0	0	0	0	0	0	0	1	0	3	1	0	0	0	1	14	16	0	0	0	0	0	1	0	0	0	0	3	0	0	6	0	9	0	0	8	9	0	0	0	0	0	0	71	0	1	0	0	0
BB62	0	0	24	0	1	0	0	0	0	1	2	0	34	11	0	40	57	0	0	0	0	0	198	0	0	0	0	8	16	0	0	0	0	0	0	12	1	0	0	2	0	0	0	1	0	1	0	0	0
BB65	0	0	915	0	0	1	0	182	42	0	0	0	120	2	0	1	0	0	0	0	0	0	841	0	0	0	202	2	0	0	0	0	0	0	0	14	0	0	1	0	0	0	0	40	0	0	0	0	0
BB67	0	0	653	0	0	0	0	0	0	0	1	331	2	0	0	0	0	4	0	0	0	0	102	0	1	0	208	8	0	1	0	0	1	0	0	15	0	0	0	0	0	0	0	2	0	0	0	0	0
BB68	0	0	0	0	0	0	0	0	0	0	0	0	0	0	0	0	0	0	3	0	8	0	20	0	0	0	0	7	0	12	0	0	9	0	0	2	0	0	0	0	0	0	0	0	0	0	0	0	0
BB69	0	0	336	0	0	1	0	0	0	0	2	0	0	1	0	0	0	1	0	0	0	0	372	0	81	0	0	96	0	237	112	0	0	1	0	17	0	0	0	0	0	0	0	160	0	0	0	0	0
BB70	0	0	0	0	0	2	0	0	0	0	1	0	0	8	0	0	0	0	0	0	0	0	396	0	0	0	506	15	14	0	0	0	1	0	0	17	0	0	0	0	0	0	0	281	0	0	2	0	0
BB71	0	0	1	0	0	0	0	0	0	1	1	0	0	0	1	0	1	0	0	0	0	0	3	0	0	0	0	1	102	0	3	0	0	0	0	4	1	0	0	0	0	0	0	1	0	0	0	0	0
BB72	0	0	12	0	1	0	0	0	0	1	0	0	0	0	98	0	0	0	0	0	0	0	34	0	0	0	1	0	3	0	0	0	0	0	0	3	6	0	0	0	0	0	0	4	0	0	0	0	0
BB73	0	0	0	0	0	0	1	0	0	0	1	0	0	2	0	0	0	1	0	0	0	0	583	0	0	0	0	0	0	0	2	0	0	0	0	12	0	0	0	0	0	592	0	1	0	0	0	0	0
BB74	0	0	1	0	0	1	0	1	0	0	0	1	0	0	0	2	1	0	0	0	0	0	8	1	0	0	4	1	0	7	3	0	0	0	0	4	0	0	0	0	0	0	0	2	0	0	0	4	0
BB75	1	0	189	0	0	1	146	0	0	0	0	0	0	1	0	0	67	0	0	0	0	0	1	0	0	0	0	3	0	0	75	0	0	1	2	11	199	0	0	0	0	0	0	12	0	0	0	0	0
BB76	0	0	0	0	0	0	0	0	0	0	1	0	0	0	0	11	0	0	0	0	0	0	12	0	0	0	10	1	0	0	0	0	0	0	8	3	7	0	0	0	0	0	0	0	0	0	0	0	0
BB77	0	0	254	0	0	0	0	0	0	0	0	0	0	10	0	0	0	0	0	0	0	0	711	0	0	0	0	321	0	0	0	0	0	0	0	9	0	0	0	0	0	0	0	1	0	0	0	0	0
BB78	0	0	67	0	0	2	0	0	0	1	0	0	0	21	0	0	0	0	0	0	0	0	284	0	0	0	0	1	0	0	1	0	0	0	1	8	0	0	0	0	0	1	1	0	0	0	0	0	0
BB79	0	0	0	0	0	0	0	0	0	0	0	0	0	0	0	0	0	0	0	0	4	0	8	0	0	0	16	17	0	0	1	0	0	0	0	19	0	0	0	0	0	0	0	2	0	0	0	0	0
BB80	0	0	0	0	0	2	0	0	0	0	0	0	0	10	0	0	1	0	0	0	0	0	61	0	0	0	0	12	0	3	0	0	0	0	0	3	0	0	0	0	0	0	0	0	0	0	0	0	0
BB81	8	0	1	0	0	0	0	0	0	0	0	0	0	1	0	0	0	1	0	0	0	0	9	0	0	0	0	43	0	0	0	0	0	10	0	5	2	0	0	3	0	0	0	7	0	0	0	0	0
BB82	0	0	0	0	0	2	0	0	0	0	0	0	0	0	0	1	0	0	0	0	0	0	3	1	0	0	0	3	0	3	0	0	0	0	0	62	0	0	0	0	0	0	0	75	0	0	0	0	0
BB83	0	0	4	0	0	1	0	0	0	0	0	0	0	0	0	0	0	0	0	0	0	0	3	0	0	0	0	2	0	6	0	0	0	1	0	5	0	0	0	0	0	0	0	5	0	0	0	0	0
BB84	0	0	2	0	0	1	0	0	0	0	0	0	0	1	0	0	0	1	0	0	0	0	4	0	0	0	2	65	0	0	0	0	0	19	0	13	0	0	0	0	0	0	0	1	0	0	0	0	0
BB85	0	0	1	0	0	1	0	1	1	0	0	0	0	0	0	0	0	0	0	0	0	3	4	1	0	0	0	4	0	0	0	0	0	1	0	2	0	0	0	0	0	0	0	0	0	0	0	0	0
BB86	0	0	0	5	0	1	0	0	0	0	0	0	0	8	0	6	6	0	0	0	0	0	14	0	0	0	0	4	0	0	2	0	0	0	2	7845	3	0	0	0	0	3	0	74	0	0	2	0	0
BB87	0	0	2	0	0	1	0	0	0	0	0	0	0	1	0	0	0	0	0	0	0	0	166	2	0	0	122	54	0	135	0	0	0	0	2	2607	33	0	0	0	0	0	0	82	0	0	0	0	0
BB89	0	0	2	0	0	1	0	0	0	6	0	0	0	0	0	1	0	0	0	0	0	0	12	2	0	0	0	1	0	0	0	0	0	0	0	1	1	0	0	0	0	1	0	0	0	0	0	0	0
BB90	0	0	0	0	1	0	0	0	0	0	0	0	0	72	1	0	0	0	0	0	0	0	488	0	0	0	0	3	0	1	0	0	0	0	0	50	0	0	0	0	0	0	0	69	0	0	0	0	0
BB91	0	2	2	0	0	1	0	0	0	0	0	0	0	49	0	0	29	0	0	0	0	0	768	1	0	0	0	2	0	0	0	0	1	0	0	16	0	0	0	0	0	0	0	6	0	0	0	0	0
BB92	0	1	32	0	0	1	0	0	0	3	1	0	0	0	0	0	0	1	0	0	0	0	61	0	0	0	0	2	0	30	0	0	0	0	2	3	12	0	0	0	0	0	0	2	0	0	0	0	0
BB93	0	0	16	0	0	0	0	0	0	0	0	0	0	0	0	0	0	0	0	0	0	0	22	0	0	0	0	275	0	0	0	0	0	1	0	6	0	0	0	0	0	0	0	2	0	0	0	0	0
BB94	0	0	26	0	0	1	0	0	0	2	1	0	0	0	0	0	0	0	0	0	0	0	366	0	0	0	0	1	0	0	0	0	3	0	0	8	0	0	0	0	0	0	0	2	0	0	0	0	0
BB97	0	0	2	0	0	0	0	0	0	7	0	0	1	0	1	0	0	0	0	0	0	0	17	2	0	0	0	11	1	0	0	0	0	0	1	2	0	0	0	0	0	0	0	1	0	0	0	0	0
BB98	0	0	1	0	0	0	0	0	0	0	0	0	0	2	0	0	0	0	1	0	0	0	6	0	0	0	0	260	0	8	0	0	0	1	0	7	0	0	0	0	0	0	0	2	0	145	0	0	0
BB99	0	0	1	0	0	1	0	0	0	2	0	0	1	1	0	0	0	0	1	0	0	0	1	3	0	0	0	2	0	0	0	0	0	0	0	3	1	0	0	0	0	1	0	0	0	0	0	1	0
BCW01	0	0	12495	0	0	0	0	0	0	1	1	0	2	0	0	8	0	1	0	0	0	0	4	0	1	0	0	7	0	0	2	1	0	0	0	3	0	0	0	0	0	0	0	2	0	0	0	0	0
BCW02	0	0	2703	0	0	0	0	0	0	2	0	0	0	0	0	1	0	0	0	0	0	0	0	0	0	0	0	231	0	2	1	0	0	1	0	4	0	0	0	0	0	1	1	0	0	0	0	0	0
BCW03	0	0	4105	0	0	0	0	0	0	3	0	0	0	0	0	1	0	0	0	0	0	0	0	0	0	0	0	217	0	0	0	0	0	0	0	6	0	0	0	0	0	0	0	2	0	0	0	0	0
BCW04	0	0	5573	0	3	0	0	0	0	131	1	0	1	0	15	1	2	0	0	0	0	0	3	0	0	0	0	5	0	0	1	0	0	1	0	14	0	0	0	0	0	0	0	3	0	0	0	0	0
BCW05	0	0	12917	0	98	0	0	0	0	1	0	0	0	0	0	3	0	1	0	0	0	0	0	0	1	0	0	0	0	0	6	0	0	0	0	5	0	0	0	0	2	1	0	0	0	0	0	0	0
BCW06	0	0	2015	0	0	0	0	0	0	1	0	0	0	0	38	0	0	0	0	0	0	0	3	0	0	0	0	3	0	1	0	0	0	0	0	23	0	0	0	0	0	0	0	17	0	0	0	0	0
BCW07	0	0	14387	0	2	0	0	0	0	133	0	0	0	0	3	4	0	0	0	0	0	0	3	0	1	0	0	1	0	0	6	0	0	1	0	3	0	0	1	0	0	0	0	0	0	1	0	0	0
BCW08	1	0	3420	0	0	0	0	0	0	983	0	0	0	0	337	1	0	1	0	0	1	0	6	0	1	0	0	7	0	2	0	0	0	0	0	6	0	0	0	0	0	0	0	3	0	0	0	0	0
BCW09	0	0	563	0	0	0	0	0	0	53	3	0	0	0	0	0	2	0	0	0	0	0	1	1	0	0	0	301	0	0	1	1	0	0	0	1	1	0	0	0	0	0	0	4	0	1	0	0	0
BCW10	0	1	916	0	0	0	0	0	0	12	1	0	0	1	0	3	1	0	0	0	0	0	2	0	0	0	0	271	0	0	1	0	0	3	0	3	0	0	0	0	0	0	0	3	0	5	0	0	0
BCW11	2	0	151	0	0	0	0	0	0	437	1	0	0	0	0	0	3	0	0	0	0	0	3	1	0	1	0	11	0	0	0	0	0	0	0	40	0	0	0	0	0	0	0	24	0	1	0	0	0
BCW12	0	1	6877	0	0	0	0	1	0	5	1	0	0	2	2	3	2	0	0	0	1	0	1	3	0	0	1	10	0	0	0	1	0	0	0	3	1	0	7	0	0	0	0	0	0	1	0	0	1
BCW13	0	0	16088	0	0	1	0	0	0	11	1	0	0	0	0	8	0	0	0	0	0	0	1	1	3	0	0	10	0	0	1	1	0	0	0	1	0	0	0	0	0	0	0	4	0	1	0	0	0
BCW14	0	2	216	0	0	0	0	0	0	74	2	0	0	0	0	0	1	0	0	0	0	0	0	0	0	1	1	213	0	2	1	0	0	2	0	13	0	0	0	0	0	0	0	10	0	4	0	0	0
BCW15	0	0	11579	0	0	0	0	0	3	22	2	0	0	0	1	2	1	0	0	0	0	0	3	1	1	0	0	9	0	0	3	0	0	0	0	3	0	0	0	0	0	11	0	2	0	0	0	0	0
BCW16	0	0	4521	0	0	0	0	0	1	6	3	0	0	0	0	1	0	0	0	0	1	0	1	0	1	1	0	2	0	0	0	0	0	0	0	3	1	0	0	0	0	0	0	1	0	2	0	0	0
BCW17	1	0	6495	0	0	0	0	1	0	1461	0	0	0	2	0	2	0	0	0	0	0	0	0	0	1	0	0	12	0	0	0	0	0	0	0	0	0	0	0	0	0	0	0	0	0	0	0	0	0
BCW18	1	0	9092	0	0	0	0	1	0	10	2	0	2	0	1	4	1	0	0	0	0	0	0	0	3	0	0	7	0	0	0	0	0	0	0	0	0	0	0	0	0	0	0	0	0	0	0	0	0
BCW19	0	0	6843	0	0	0	0	3	0	7	0	0	1	0	0	4	0	0	0	0	0	0	2	0	0	0	0	6	0	0	0	0	0	0	0	1	0	0	1	0	0	0	0	3	0	0	0	0	0
BCW20	0	0	1321	0	0	0	0	0	0	212	1	0	0	1	0	2	0	0	0	1	0	0	3	0	0	0	0	174	0	3	0	0	0	1	0	3	1	0	0	0	0	2	0	11	0	0	1	0	0
BCW21	0	0	17134	0	0	0	0	0	0	1	0	0	0	0	0	4	0	0	0	0	0	0	1	0	3	0	0	6	0	1	2	0	1	0	0	0	0	0	0	0	0	0	0	1	0	0	0	0	0
BCW22	1	0	154	0	0	0	0	0	1	0	2	0	0	0	0	0	0	0	0	0	0	0	2	0	0	0	0	292	0	3	0	0	0	0	0	0	0	0	0	0	0	2	0	0	0	0	0	0	0
BCW23	0	0	17717	0	0	0	0	0	0	4	1	0	0	1	0	6	0	0	0	0	0	0	2	0	0	0	0	5	0	0	3	0	0	0	0	2	0	0	0	0	0	0	0	2	0	0	0	0	0
BCW24	0	0	11639	0	0	0	0	2	0	0	0	0	3	2	0	4	0	0	0	0	0	0	2	0	2	0	0	4	0	0	1	0	0	0	0	3	0	0	1	0	0	2	0	0	0	0	0	0	1
BCW25	1	0	16392	0	0	0	0	0	0	3	1	0	0	1	0	12	0	0	0	0	0	0	0	4	2	1	0	7	0	0	2	1	0	0	0	2	0	0	0	0	0	0	0	0	0	1	0	0	0
BCW26	0	0	1015	0	0	0	0	0	0	5	2	0	0	1	0	0	0	0	1	0	0	0	2	0	1	0	1	267	0	1	0	1	0	0	0	7	0	0	0	0	0	0	0	3	0	1	0	0	0
BW01	0	1	19	0	0	0	0	0	0	1	18	0	0	6	0	0	0	0	0	0	0	0	4	0	2	0	0	282	0	0	1	0	0	11	0	33	0	0	0	0	0	1	19	1127	0	10	0	0	0
BW02	0	4	11	0	5	0	0	0	0	0	14	0	0	7	0	0	1	0	0	0	0	0	6	0	7	0	0	112	0	2	0	0	0	6	0	425	0	0	0	0	0	0	0	33	0	6	0	0	0
BW03	0	5	24	0	18	2	0	0	0	0	1	0	0	1	1	0	1	11	0	0	0	0	2	0	214	0	0	150	0	1	0	0	0	15	0	889	0	0	0	0	0	1	0	22	0	140	0	0	3
BW04	0	24	15	0	18	0	0	0	0	3	152	0	0	3	3	0	0	1	0	0	0	0	1	0	26	0	0	164	0	0	1	0	0	5	0	55	0	0	0	0	0	0	2	9	0	67	0	0	0
BW05	0	3	18	0	1	0	0	0	0	3	1	0	15	27	1	0	0	58	0	0	0	0	1	0	14	0	1	35	0	1	1	0	0	3	0	78	1	0	0	0	0	1	131	93	0	85	0	0	0
BW06	0	1	19	0	0	0	0	0	0	0	0	0	0	70	0	1	0	10	0	0	0	0	16	0	3	0	0	89	0	0	0	2	0	16	0	41	0	0	61	0	0	0	0	11	0	132	0	0	0
BW07	1	3	28	0	1	0	1	0	0	0	3	0	1	27	0	0	0	0	0	0	0	0	2	0	7	0	0	88	0	0	1	1	0	9	0	250	0	0	0	0	0	1	0	19	0	3	0	0	0
BW08	0	10	29	0	0	0	0	0	0	0	3	0	0	17	0	0	0	1	0	0	0	0	12	0	12	0	0	79	0	0	1	0	0	8	0	147	0	0	0	0	0	1	3	7	0	1	0	0	0
BW09	1	4	1	0	0	0	0	0	0	0	8	0	0	24	0	0	0	2	0	0	0	0	0	3	2	0	0	200	0	0	0	0	1	2	0	575	2	0	197	0	0	0	0	28	0	83	0	0	0
BW10	0	459	0	0	19	0	0	0	0	1	24	0	0	19	5	1	3	0	0	0	0	0	3	2	1	0	0	269	0	3	0	0	0	9	0	301	0	0	0	0	0	0	0	98	0	224	0	0	0
BW11	0	74	1	0	0	0	0	0	0	1	0	0	0	13	0	0	0	0	0	0	0	0	1	2	19	1	0	145	0	1	0	0	1	10	0	315	1	0	0	0	0	0	5	41	0	116	0	0	0
BW12	0	81	1	0	10	0	0	0	0	70	10	0	0	51	0	0	0	0	0	0	0	0	0	3	15	0	0	236	0	0	0	1	0	4	0	78	0	0	0	0	0	0	189	18	0	153	0	0	0
BW13	0	2	0	0	2	0	0	0	0	0	1	0	0	6	0	1	0	0	0	0	0	0	0	2	1	0	1	143	0	1	0	0	0	1	0	1169	1	0	0	0	0	0	1	12	0	2	0	0	0
BW14	0	2	0	0	2	0	0	0	0	1	3	0	0	1	0	0	0	0	1	0	0	0	0	3	45	0	0	161	0	0	0	0	0	10	0	38	0	0	1	0	0	1	0	13	0	80	0	0	0
BW15	0	1	0	0	0	2	0	0	0	1	14	0	1	45	0	2	0	0	0	0	1	0	2	0	0	0	0	85	0	0	2	0	0	11	0	549	2	0	1	0	0	0	37	9	0	135	0	0	0
BW16	0	3	0	0	5	0	0	0	0	1	28	0	0	1	0	1	0	0	0	0	0	0	1	1	0	0	0	180	0	1	0	0	1	9	0	556	0	0	0	0	0	0	0	33	0	1	0	0	0
BW17	0	40	2	0	0	0	0	0	0	1	115	0	0	3	2	0	1	0	0	0	0	0	7	0	0	0	0	209	0	1	0	0	0	16	0	446	3	0	0	0	0	0	0	11	0	102	0	0	0
BW18	0	2	2	0	0	0	0	0	0	1	4	0	0	0	0	0	0	0	0	0	0	0	2	0	1	0	0	86	0	2	0	0	1	24	0	149	0	0	0	0	0	0	0	9	0	34	0	0	0
BW19	0	511	2	0	0	0	0	0	0	150	0	0	0	23	0	0	1	0	1	0	0	0	25	1	21	0	0	185	0	0	0	0	0	7	0	524	0	0	0	0	0	0	0	124	0	0	0	0	0
BW20	0	96	660	0	0	0	0	0	0	1	0	0	0	1	0	0	0	0	0	0	0	0	0	0	0	0	0	263	0	0	1	0	0	8	0	117	0	0	0	0	0	0	0	29	0	32	0	0	0
BW21	0	5	909	0	91	0	0	0	0	1	1	0	0	90	0	0	1	1	1	0	0	0	2	0	6	0	0	233	0	2	0	0	0	14	0	120	0	0	0	0	0	0	0	82	0	10	0	0	0
BW22	0	32	397	0	2	1	0	0	0	98	100	0	0	15	0	1	0	0	1	0	0	0	1	0	0	0	0	153	0	1	2	0	0	10	0	190	0	0	0	0	0	0	0	15	0	1	0	0	0
BW23	0	76	0	0	1	2	0	0	0	0	7	0	0	38	0	0	2	0	0	0	0	0	42	1	1	0	0	114	0	1	1	0	0	5	0	106	0	0	0	0	0	0	0	46	0	24	0	0	0
BW24	0	194	4	0	18	467	0	0	0	11	232	0	0	6	0	1	0	7	1	0	0	0	3	0	4	0	1	83	0	0	0	0	0	11	0	101	0	0	6	0	0	1	0	13	0	4	0	0	0
BWd01	0	2	0	0	0	0	0	0	0	1	84	1	0	1	0	0	0	0	0	0	1	0	59	1	0	0	0	163	0	0	0	0	0	13	1	12	0	0	0	0	0	0	0	7	0	0	0	0	0
BWd02	2	1	0	0	0	0	0	0	0	1	2	1	6	0	13	0	1	0	0	0	0	0	2	0	0	0	0	79	0	1	0	0	0	17	0	11	0	0	0	0	0	0	0	12	0	0	0	0	0
BWd03	0	1	1	0	0	1	0	0	0	0	1	0	1	0	0	0	0	0	0	0	0	0	5	1	0	0	0	170	0	0	1	0	0	4	0	20	4	0	0	0	0	2	0	57	0	0	0	0	0
BWd04	1	1	2	0	0	0	0	0	0	0	1	0	0	1	0	0	0	0	0	0	0	0	4	1	0	0	0	447	0	0	0	0	0	1	0	74	0	0	0	0	0	1	0	6	0	107	0	0	0
BWd05	1	0	0	0	1	0	0	0	0	452	0	1	1	2	0	0	0	0	0	0	0	0	3	0	0	0	0	262	0	1	0	0	0	8	0	362	0	0	0	0	0	0	0	22	0	6	0	0	0
BWd06	0	2	0	0	0	0	0	0	0	0	0	1	0	1	0	0	0	0	0	0	0	0	10	0	0	0	5	330	0	0	0	0	0	1	0	25	0	0	0	13	0	4	0	6	0	0	0	0	0
BWd07	0	1	2	0	0	0	0	0	0	2	1	0	0	1	0	4	1	0	0	0	0	0	2	0	0	0	0	401	0	1	0	0	1	14	0	1906	0	0	0	0	0	0	0	24	0	0	0	0	0
HW01	0	5	7	0	0	0	0	0	0	4	9	0	0	1	0	0	0	0	0	0	0	0	3	0	53	0	0	59	0	0	0	0	0	2	0	23	0	0	0	0	0	0	0	13	0	5	0	0	0
HW02	0	12	9	0	0	1	0	0	0	1	78	0	0	6	0	0	1	0	0	0	0	0	1	1	0	0	0	235	0	1	1	0	0	2	0	407	0	0	0	0	0	2	0	24	0	1	0	0	0
HW03	0	14	7	0	0	0	0	0	0	5	21	0	0	64	3	2	0	0	0	0	0	0	109	1	4	0	0	66	0	2	0	2	0	5	0	121	0	0	0	0	0	0	0	43	0	84	0	0	0
HW04	1	7	23	0	0	2	0	0	0	5	55	0	1	120	0	0	0	0	0	0	0	0	0	1	6	0	0	151	0	0	1	1	0	12	0	958	0	0	0	0	0	1	0	1561	0	32	0	0	0
HW05	0	11	15	0	0	0	0	0	0	2	76	0	0	68	0	0	0	0	0	0	0	0	4	1	3	0	1	63	0	0	0	0	0	1	0	370	0	0	0	0	0	0	0	43	0	189	0	0	0
HW06	0	8	12	0	0	1	0	0	0	14	1	0	0	60	2	1	0	0	0	0	0	0	3	0	4	0	0	147	0	0	1	0	0	4	0	448	0	0	0	0	0	1	0	96	0	30	0	0	0
HW07	1	1	11	0	0	0	0	0	0	109	0	0	0	36	1	1	0	14	0	0	0	0	2	2	3	0	0	67	0	0	0	0	0	7	0	168	0	0	0	0	0	0	0	68	0	158	0	0	0
HW08	0	2	22	0	0	0	0	1	0	4	0	0	0	9	0	0	1	0	0	0	0	0	6	0	0	0	0	48	0	1	0	0	0	1	0	138	0	0	0	0	0	1	0	941	0	52	0	0	0
HW09	0	4	12	0	0	113	0	0	0	1	73	0	0	21	0	0	0	0	0	0	0	0	11	0	0	0	0	134	3	1	0	0	0	3	0	220	9	0	0	0	0	1	0	57	0	4	0	0	0
HW10	0	112	11	0	0	2	0	0	0	0	0	0	0	7	8	1	0	0	0	1	0	0	4	0	1	0	0	54	0	1	0	0	1	0	0	207	1	0	0	1	0	0	0	39	0	0	0	0	0
HW11	0	0	19	0	0	1	0	0	0	0	4	0	2	4	0	0	1	0	0	1	0	0	2	0	10	0	0	168	0	0	0	0	0	8	0	213	0	0	0	0	0	1	0	76	0	2	0	0	0
HW12	0	6	23	0	1	1	0	0	0	1	50	2	0	23	0	1	1	1	0	1	0	0	3	0	647	0	1	114	0	0	0	0	0	8	0	106	1	0	0	0	0	1	0	38	0	204	0	0	0
HW13	1	4	15	0	0	632	0	0	0	0	155	4	0	51	3	0	2	0	0	0	0	0	1	0	4	0	0	80	0	0	0	0	0	5	0	141	1	0	1	0	0	0	0	34	0	0	0	0	0
HW14	0	117	13	0	0	11	0	0	0	1	49	0	0	15	6	0	0	0	0	1	0	0	0	0	4	0	0	115	0	1	0	0	0	6	0	543	0	0	0	0	0	0	0	52	0	0	0	1	0
HW15	0	32	15	0	0	0	0	0	0	1	58	1	0	154	0	0	0	0	0	1	0	0	3	0	1	0	0	88	0	0	0	0	0	6	0	587	2	0	0	0	0	0	0	114	0	2	0	1	0
HW16	0	0	24	0	0	0	1	0	0	1	48	0	0	46	0	0	0	0	0	2	0	0	3	0	1	0	0	217	0	1	0	0	0	7	0	988	0	0	0	0	0	1	0	41	0	2	0	1	0
LW01	1	2	0	0	9	0	0	94	4	7	9	0	0	53	11	0	0	0	1	0	0	0	3	3	0	0	0	152	0	5	0	0	0	4	0	578	0	0	0	1	0	0	0	12	0	0	4	0	0
LW02	0	0	6	0	0	0	0	0	0	0	0	0	2	8	0	0	0	0	0	0	0	0	10	0	1	0	0	270	1	0	0	0	6	14	0	3	0	0	0	0	0	0	0	4	0	0	0	0	0
LW03	1	3	2	0	0	108	0	0	0	1	3	1	0	0	0	0	0	0	0	0	0	0	11	1	0	0	1	25	0	0	1	0	0	4	0	784	0	0	1	0	0	0	0	17	0	0	0	0	0
LW04	1	1	0	0	0	0	0	0	0	0	1	0	1	0	0	0	0	0	0	0	0	0	4	1	0	0	0	133	0	3	1	0	0	0	0	326	0	0	0	0	0	0	0	12	0	0	0	0	0
LW05	1	0	0	0	0	0	0	0	0	0	0	0	0	0	0	0	0	0	1	0	0	0	6	1	0	0	0	479	0	0	1	0	0	2	0	40	0	0	0	0	0	2	0	6	0	0	0	0	0
LW06	0	1	4	0	0	0	0	0	0	0	0	1	0	0	0	0	0	0	0	0	0	0	6	2	0	0	0	736	0	2	1	0	1	18	0	1538	1	0	0	0	0	0	0	25	0	0	0	0	0
LW07	0	1	16	0	0	0	0	7	0	6	1	0	0	3	0	0	3	0	1	0	0	0	6	1	0	0	0	181	0	1	0	1	0	3	0	31	0	0	0	0	0	0	0	27	0	1	0	0	0
LW08	0	1	18	0	0	0	0	0	0	5	0	0	0	0	1	2	1	0	0	0	0	0	4	2	2	0	0	196	0	6	0	1	0	2	0	910	0	0	0	0	0	0	0	43	0	0	0	0	0
LW09	0	0	31	0	0	0	0	1	0	3	8	0	0	18	0	0	0	0	1	0	0	0	7	0	1	1	0	44	0	1	2	1	0	9	0	19	0	0	0	0	0	123	0	412	0	1	0	0	0
LW10	0	0	17	0	0	0	0	0	0	3	936	0	0	0	0	0	0	0	0	0	1	0	20	0	0	0	0	426	0	0	0	0	0	5	0	32	0	0	0	0	0	5	0	18	0	1	0	0	0
LW11	0	1	14	0	0	0	0	0	1	2	9	0	0	6	0	0	1	0	0	0	0	0	8	0	0	0	7	251	0	0	0	3	0	2	0	1440	0	0	0	0	0	3	0	19	0	1	0	0	0
LW12	0	0	18	0	0	0	0	0	0	2	25	0	0	3	20	0	0	0	1	0	1	0	20	17	0	0	0	2163	0	0	1	0	0	12	0	1692	0	0	0	0	0	0	0	42	0	2	0	0	0
OWW01	1	0	1	0	5	5	0	0	0	0	149	1	0	66	3	0	0	0	0	0	0	0	4	0	0	0	3	182	1	4	0	0	0	8	0	124	0	0	2	0	0	0	0	811	0	0	0	0	0
OWW02	1	3	0	0	0	0	0	0	0	0	2	1	0	2	0	1	0	0	0	0	0	0	4	0	0	0	1	425	1	0	0	0	0	5	0	14	0	0	34	0	0	0	0	145	0	0	0	0	0
OWW03	1	2	0	0	47	0	0	0	0	0	1	1	0	2	11	0	1	0	1	0	0	0	4	0	0	0	2	291	0	6	0	0	1	1	0	11	2	0	16	0	0	0	0	5	0	7	0	0	0
OWW04	1	144	2	0	0	1	0	0	0	0	82	3	0	2	1	0	0	0	0	0	0	0	5	1	0	0	6	591	0	0	1	0	0	43	0	44	0	0	0	0	0	0	0	308	0	0	0	0	0
OWW05	0	3	0	0	2	1	0	1	0	1	0	2	0	1	1	0	1	0	0	0	0	0	7	0	0	0	0	57	0	2	7	0	0	10	0	474	0	0	0	4	0	0	0	845	0	4	0	0	0
OWW06	1	0	2	0	0	0	0	0	0	1	74	2	0	4	0	2	0	0	0	0	0	0	5	1	0	0	0	16	0	4	0	0	0	6	0	2850	1	0	0	0	0	0	0	155	0	0	0	0	0
OWW07	0	1	0	0	0	0	0	0	0	0	18	1	0	0	0	1	0	0	0	0	0	0	3	0	0	0	0	31	0	1	0	0	0	13	0	241	0	0	0	0	0	0	0	88	0	0	0	0	0
OWW08	3	0	0	0	0	0	0	0	0	0	0	0	0	2	1	2	0	0	0	0	0	0	5	1	0	0	0	73	1	1	0	0	0	4	0	1981	0	0	0	1	0	0	0	93	3	0	0	0	0
OWW09	0	0	14	0	0	0	0	0	0	2	13	0	0	19	0	4	0	0	0	0	0	0	6	0	0	0	0	1369	0	1	0	0	0	16	0	885	0	0	3	0	0	0	0	47	0	0	0	0	0
OWW10	0	0	12	0	0	0	0	0	0	1	0	0	0	13	0	0	0	0	0	0	0	0	4	0	0	0	0	362	0	0	0	0	0	23	0	736	0	0	0	0	0	0	0	27	0	0	0	0	0
OWW11	0	0	8	0	1	11	0	1	0	73	0	0	0	18	0	0	0	0	0	0	0	0	1	0	0	0	0	1000	0	0	0	0	0	3	0	306	0	0	0	0	0	1	0	95	0	1	0	0	0
OWW12	0	0	13	0	0	0	1	2	1	1	3	0	0	0	18	0	1	0	0	0	0	0	61	0	0	0	0	62	0	0	1	0	0	23	0	9	0	0	1	0	0	0	0	4	0	2	0	0	0
OWW13	1	0	9	0	0	0	0	0	0	1	1	0	0	0	0	11	0	0	0	0	0	0	6	0	2	0	0	990	0	1	0	0	0	0	0	198	0	0	0	0	1	0	0	4	0	0	0	0	0
OWW14	0	0	4	0	1	0	0	0	0	5	2	0	1	0	0	0	0	0	0	0	0	0	5	0	1	0	0	10	0	2	0	0	0	0	0	11	3	0	2	0	0	0	0	8	0	0	0	0	0
OWW15	0	0	12	0	0	0	0	2	1	1	2	0	5	4	0	0	0	0	0	0	0	0	13	0	1	0	0	454	0	0	0	0	3	14	0	619	0	0	0	0	0	2	0	1250	0	0	0	0	0
OWW16	0	0	41	0	6	0	0	0	0	299	11	0	2	237	5	1	9	0	0	0	0	0	13	0	0	0	0	223	0	3	0	0	0	23	0	8	0	0	1	0	0	2	0	16	0	0	0	0	0
PH01	0	1	1	0	0	0	0	0	0	3	3	0	0	5	0	0	0	0	0	0	1	0	12	0	0	0	0	184	0	0	0	0	0	5	1	17	1	0	0	0	0	0	0	3	0	1	0	0	0
PH02	1	0	0	0	0	0	0	0	0	4	1	0	1	1	172	6	0	0	0	0	0	0	6	0	0	0	0	145	0	0	0	0	0	4	2	807	0	0	0	0	0	0	1	20	0	0	0	0	0
PH03	0	0	3	0	16	0	0	0	0	1	0	0	1	14	0	0	0	0	0	0	0	0	13	0	3	6	0	46	0	9	0	0	0	24	2	19	0	0	0	0	0	1	0	308	0	0	0	0	0
PH04	0	1	0	0	0	0	0	0	0	2	398	0	1	3	2	0	0	0	0	0	0	0	6	0	0	0	0	335	0	0	0	0	0	9	2	24	4	0	0	0	0	1	0	4	0	1	0	0	0
PH05	0	1	6	0	2	1	0	0	0	25	10	0	0	1	3	1	0	0	0	0	0	0	8	0	0	1	0	142	0	0	0	0	0	2	4	985	0	0	0	0	0	0	0	7	1	0	0	0	0
PH06	0	0	0	0	0	0	0	1	0	0	11	0	0	7	23	0	0	0	0	0	0	0	16	0	1	0	0	2437	0	1	1	0	0	12	1	2147	0	0	0	0	0	6	2	28	0	0	0	0	2
PH07	0	0	95	0	0	0	0	0	0	1	0	0	0	85	4	94	0	0	0	0	0	0	335	0	0	0	0	171	0	111	0	0	0	4	0	167	0	0	0	0	0	3	1	41	167	0	0	0	0
PH08	0	0	0	0	1	0	0	1	0	3	1	0	0	4	646	0	0	0	0	0	0	0	10	0	0	0	0	11	0	0	0	0	0	3	2	11	0	0	0	0	0	0	1	0	0	2	0	0	0
PH09	0	1	6	0	0	0	0	0	0	1	0	0	0	0	0	5	3	0	0	0	0	0	6	5	0	0	6	0	0	0	0	0	0	0	0	4	1	6	0	0	0	0	0	0	0	1	0	0	0
PH10	0	1	3	0	0	0	0	0	0	0	0	7	0	0	0	6	0	0	0	0	0	0	12	4	0	4	0	0	0	0	0	0	0	0	0	1	0	0	0	0	0	0	0	1	0	2	0	0	0
PH11	0	0	19	0	0	0	0	0	0	2	0	0	0	58	0	228	0	0	0	0	0	0	283	0	65	0	0	5	0	110	0	0	0	0	0	9	71	0	0	0	0	0	0	34	6	1	0	0	71
PH12	0	0	0	0	0	0	0	0	0	1	0	0	1	1	0	0	0	0	0	0	0	0	11	4	0	0	0	12	0	0	0	0	0	0	0	2	0	0	0	0	0	0	0	3	0	1	0	0	0
PH13	1	0	0	0	0	251	0	0	0	0	1	0	1	42	1	0	0	0	0	0	0	0	239	1	0	0	0	5	0	288	163	0	2	0	0	13	0	0	0	0	0	0	0	10	0	1	0	0	0
PH14	0	1	1	0	0	0	0	0	0	1	0	0	0	30	818	45	1	0	1	0	0	0	701	2	19	0	0	1	0	0	14	0	48	0	0	11	49	0	0	0	0	0	0	1	0	0	0	0	0
PH15	0	0	0	0	0	0	0	0	0	9	1	0	0	4	0	14	0	0	0	30	0	0	19	0	0	0	26	16	0	14	0	0	0	0	0	0	0	0	0	6	0	0	0	0	0	0	0	0	0
PH16	241	0	92	0	0	1	0	0	0	0	0	0	43	9	0	119	0	0	0	0	0	0	273	0	0	0	144	1	0	0	0	0	0	0	0	23	0	0	0	0	0	220	0	0	44	1	0	0	0
PH17	23	0	22	0	0	0	1	28	5	1	0	0	0	22	0	29	14	0	0	0	0	0	42	0	0	18	0	0	0	50	24	0	0	0	0	3	15	18	0	0	0	9	0	20	0	0	0	0	0
PH18	0	0	17	0	0	0	0	1	0	0	0	0	0	9	122	0	0	1	0	0	9	8	15	0	3	0	0	4	0	66	0	0	0	0	0	2	0	0	0	0	7	9	1	6	0	0	0	0	0
PH19	0	0	0	0	0	5	0	0	0	0	0	0	0	0	0	0	0	0	0	1	0	0	12	0	0	0	0	3	0	0	0	0	0	0	0	1	0	0	0	0	0	40	0	2	0	0	0	0	0
PH20	0	0	1	0	0	1	0	1	0	1	0	0	1	1	0	0	0	0	0	0	0	0	2	0	1	0	0	1	0	1	0	0	0	0	0	1	0	0	0	0	0	0	1	0	0	1	0	0	0
PH21	1	0	442	0	0	0	0	87	12	0	0	0	46	56	0	45	0	0	0	0	139	0	366	0	24	0	0	75	0	0	95	0	0	1	0	11	139	0	0	0	0	121	0	2	0	0	0	0	0
PH22	1	0	0	0	0	1	0	2	0	6	1	0	0	9	0	4	1	1	0	1	0	0	5	0	0	0	0	6	0	7	6	1	0	0	0	0	0	0	0	0	0	48	0	2	0	0	0	0	0
PH24	1	0	0	0	0	0	0	0	0	2	0	0	0	10	0	0	1	0	0	0	0	0	14	0	7	0	0	3	0	18	0	0	0	1	0	2	0	0	0	0	0	0	1	2	0	0	0	0	0
SAC02	0	0	0	0	0	0	0	0	0	1	0	1	0	0	274	0	1	0	0	0	0	0	32	1	15	0	0	4	0	0	0	0	0	0	0	3	0	0	0	1	0	0	0	1	0	0	0	0	0
SAC03	0	0	0	0	1	0	0	0	0	1	1	0	1	150	6	0	0	0	0	0	0	0	232	0	0	0	0	116	0	95	0	0	1	1	0	7	0	0	0	0	0	0	0	9	0	0	0	0	0
SAC04	1	3	80	0	0	0	0	0	0	1	2	4	0	62	1	0	0	0	0	0	0	0	1377	0	4	0	0	6	0	1	0	0	0	0	0	15	0	0	0	0	0	0	0	2	0	1	0	0	0
SAC05	1	1	0	0	0	0	0	2	0	1	0	0	15	1	0	0	0	0	0	0	0	0	211	0	0	0	169	13	0	0	11	0	0	0	0	13	103	0	0	0	0	0	0	5	0	0	0	0	0
SAC06	0	0	0	0	0	0	0	0	0	4	1	2	1	0	0	0	0	1	0	0	0	0	63	1	0	0	0	1	0	0	0	0	0	0	0	5	0	0	0	0	0	0	0	1	0	0	0	0	0
SAC07	1	0	0	0	0	1	0	1	0	1	1	1	0	0	3	0	0	0	0	0	1	0	144	0	0	0	0	0	0	0	0	0	0	0	0	7	0	0	0	0	0	0	0	1	0	0	0	0	0
SAC08	0	0	3	0	0	0	0	0	0	0	0	2	0	0	0	0	0	0	0	0	0	0	658	2	0	0	6	12	3	1	4	0	378	0	0	16	0	0	0	0	0	116	0	32	0	0	0	0	0
SAC09	0	1	21	0	0	0	0	2	0	6	4	0	8	0	5	0	237	0	0	0	1	0	512	0	1	0	0	146	0	1	26	0	1	0	0	6	0	0	0	0	0	1	0	6	0	1	0	0	0
SAC10	0	2	6	0	0	1	0	1	0	6	1	0	0	3	529	0	1	0	0	0	1	1	64	1	4	0	0	7	0	0	1	1	0	0	0	3	0	0	0	0	0	1	0	5	0	4	0	0	0
SAC11	1	1	317	0	0	0	0	0	0	1	1	0	0	65	13	0	238	0	0	0	0	0	590	0	2	0	593	10	0	0	14	1	0	0	0	19	0	0	0	0	0	1	0	7	0	5	0	0	0
SAC12	0	2	44	0	0	1	0	0	0	12	1	0	0	2	3	0	2	0	0	1	0	0	15	3	3	1	0	9	0	0	7	1	0	0	0	4	28	0	0	0	0	0	0	4	0	1	0	0	0
SAC13	0	1	13	0	0	0	0	11	0	11	1	0	2	0	2	0	1	0	0	0	0	0	138	0	0	0	0	10	0	0	38	0	0	0	0	9	0	0	0	0	0	8	0	3	0	5	0	0	0
SAC14	0	0	117	0	0	1	0	9	0	0	4	0	0	59	0	0	2	0	0	0	1	0	9	0	0	0	0	7	0	0	114	253	0	1	0	9	0	0	0	1	0	1	0	10	0	4	0	0	0
SAC15	2	0	10	0	0	0	0	0	0	6	0	0	0	1	1	1	1	0	0	0	1	0	39	1	0	1	1	8	0	0	1	0	0	0	0	2	1	0	0	0	0	0	0	4	0	5	0	0	0
SAC16	0	0	9	0	0	0	0	0	0	4	1	0	0	51	1	0	3	0	1	0	1	0	345	2	0	0	0	72	0	1	16	1	0	0	0	4	0	0	0	0	0	0	0	7	0	0	0	0	0
SNG01	0	0	2079	0	0	1	0	1	0	0	1	0	1	32	0	2	0	0	0	2	0	0	103	0	3	0	0	50	0	0	0	0	0	4	0	7	1	0	0	0	0	1	0	2	0	0	0	1	0
SNG02	0	0	10	0	0	1	0	205	22	1	0	3	1	7	0	0	0	0	0	176	0	0	154	0	1	0	0	124	0	0	89	0	1	0	0	1	0	0	0	0	0	0	0	18	0	0	0	1	0
SP10	0	0	4427	0	0	2	1	0	0	0	0	3	0	1	0	1	0	0	0	0	0	0	1	1	2	0	0	9	0	0	0	0	0	0	0	16	7	0	0	0	0	1	0	7	0	0	0	0	0
SP11	0	0	2686	0	0	0	0	0	0	1	0	0	0	0	0	1	0	0	2	0	0	0	1	7	2	0	1	14	0	1	0	0	0	0	0	371	5	0	0	0	0	1	0	37	0	0	0	1	0
SP12	0	0	1584	0	0	1	0	0	0	0	0	0	0	7	0	2	0	0	0	0	0	0	1	13	1	0	2	7	0	2	0	0	0	0	0	38	5	0	1	0	0	0	0	8	0	0	0	0	0
SP13	0	0	1746	0	0	0	0	0	0	43	1	0	1	0	0	1	0	0	0	4	0	0	2	4	1	0	0	186	0	0	0	0	0	23	0	18	3	0	0	0	0	0	0	4	0	0	0	0	0
SP14	0	3	4362	0	0	1	0	0	1	1	0	1	0	1	0	1	0	1	0	0	0	0	4	22	0	0	0	4	0	0	0	0	0	0	0	21	1	0	0	0	0	5	0	9	0	0	0	0	0
SP15	0	0	1483	0	0	3	0	0	0	10	2	0	0	266	0	1	0	0	0	1	0	0	0	0	0	0	0	620	0	0	0	0	1	91	0	21	7	0	0	0	0	0	0	6	0	1	0	0	0
SP16	0	0	13657	0	0	1	0	0	0	10	1	0	0	62	0	8	0	0	0	1	0	0	2	4	0	0	0	29	0	3	1	0	0	8	0	9	606	0	0	0	0	0	0	0	0	0	0	0	0
SP17	0	0	4050	0	0	1	0	0	0	1	0	1	0	1	0	2	0	0	0	4	0	0	4	0	2	0	0	22	0	4	0	0	0	1	0	23	1	0	0	0	0	0	0	10	0	0	0	0	0
WEL01	0	2	9	1	0	1	0	2	0	2	2	6	5	6	0	12	0	0	0	462	1	0	29	2	6	0	0	11	0	0	0	0	0	0	0	0	9	0	0	1	0	7	0	4	0	0	0	0	0
WEL02	0	4	27	0	0	1	0	36	12	5	22	4	26	0	3	0	0	0	0	0	1	0	72	2	28	0	0	4	0	0	2	0	0	0	0	3	0	0	1	1	0	129	0	5	0	0	0	1	0
WEL03	0	2	47	0	0	1	0	1	0	4	0	4	0	4	398	10	2	0	0	1	0	0	169	2	0	0	11	21	0	129	10	0	8	1	0	5	0	0	0	0	0	1	0	25	0	0	0	0	0
WEL04	0	0	120	0	0	0	0	0	0	3	1	2	0	86	0	684	0	0	0	3	0	0	1512	0	1	0	0	4	0	40	1	0	0	0	0	28	58	0	0	1	0	0	0	14	0	0	0	0	0
WEL05	0	2	664	0	0	0	0	0	0	0	1	4	0	156	1	0	0	0	1	0	0	0	825	0	1	0	496	9	0	2	322	0	1	0	0	26	3	0	2	0	0	0	0	10	0	0	0	0	0
WEL06	0	1	130	0	0	2	0	0	0	2	0	2	0	4	1	408	0	0	0	65	0	0	1576	1	0	0	0	10	0	0	1	0	1	5	0	23	70	0	0	0	0	50	0	5	16	0	0	0	0
WEL07	0	0	32	0	0	0	0	1	0	3	0	4	0	54	1	2	0	0	0	1	2	0	879	1	3	0	0	33	0	0	121	0	252	1	0	31	13	0	1	330	0	1	0	9	0	1	0	0	0
WEL08	0	1	21	0	0	0	0	1	0	5	1	1	0	19	0	22	1	0	0	3	12	0	30	0	0	0	0	3	0	15	0	0	0	0	0	10	7	0	1	1	0	3	0	3	0	0	0	0	0
WEL09	0	0	202	0	0	0	0	0	0	1	3	0	0	2	0	130	0	0	0	114	0	0	171	0	1	0	0	54	0	9	25	0	0	1	0	15	0	0	0	0	0	4	0	0	0	0	0	0	0
WEL10	0	0	0	0	0	11	0	0	0	1	0	0	0	66	0	71	0	0	0	0	0	0	126	0	1	0	101	52	0	0	3	0	0	0	0	18	9	0	1	0	0	16	0	2	1	0	0	0	16
WEL11	0	0	9	0	0	0	0	0	0	4	0	0	0	12	1	12	1	0	0	7	0	0	47	0	10	0	0	1	0	0	1	0	0	1	0	2	10	0	0	0	0	0	0	0	0	0	0	0	0
WEL12	2	0	1	0	0	0	0	0	0	3	0	0	0	0	1	0	0	0	0	0	0	0	7	0	0	0	0	2	0	1	0	0	2	0	0	0	0	0	1	0	0	0	0	0	0	0	0	0	0
WEL13	0	0	0	0	0	0	0	0	0	1	0	0	0	2	0	13	1	0	0	4	0	0	63	0	0	0	0	9	0	0	6	0	4	0	0	1	4	0	0	0	0	10	0	4	2	0	0	0	0
WEL14	0	0	1	0	40	2	0	0	0	15	4	9	0	29	0	53	0	0	0	0	0	6	42	0	4	0	0	2	0	70	13	0	0	0	0	7	16	0	0	0	0	12	0	10	0	0	0	0	0
WEL15	1	0	4	0	0	0	0	0	0	2	0	0	0	4	0	0	0	0	0	0	0	0	31	0	0	0	47	0	0	0	0	0	0	0	0	2	0	0	0	0	0	0	0	0	0	0	0	0	0
WEL16	0	0	0	0	0	0	0	0	0	1	0	0	0	28	0	0	0	0	0	0	0	0	153	0	90	0	0	1	0	0	0	0	0	0	0	0	51	0	0	0	0	26	0	4	0	0	0	0	0
WEL17	0	0	43	0	0	1	0	0	0	2	1	1	0	38	1	26	0	0	64	1	0	0	23	0	0	0	0	5	0	0	1	0	0	0	0	7	49	0	1	45	0	0	0	3	0	0	0	1142	0
WEL18	0	0	9	0	0	1	0	0	0	23	1	3	1	13	0	0	0	0	0	0	38	0	10	0	0	0	0	0	0	14	7	0	0	0	0	5	0	0	0	0	0	18	0	2	0	0	0	0	0
WEL19	0	1	45	0	106	0	0	5	2	1	0	1	3	3	0	11	0	0	0	1	0	0	47	0	4	0	0	2	22	1	0	0	0	0	0	7	1	0	0	0	0	2	0	0	0	0	0	0	0
WEL20	0	0	12	0	0	1	1	264	5	4	0	4	55	4	0	0	0	0	0	2	0	0	25	0	0	0	0	3	0	12	0	0	0	1	0	3	17	0	0	0	1	131	0	6	0	0	0	1	0
WEL22	0	0	6	0	0	0	0	0	0	5	0	3	0	0	0	0	0	0	0	0	0	0	44	0	0	0	0	17	0	1	15	0	0	3	0	4	1	0	0	0	0	0	0	7	0	0	0	0	0
WEL23	1	0	8	0	0	0	0	0	0	4	18	2	7	7	0	0	0	0	0	1	0	0	187	0	1	0	0	63	0	0	0	0	0	0	0	13	1	0	0	0	0	18	0	37	0	1	0	0	0
WEL24	104	0	9	0	0	0	0	0	0	1	0	2	0	72	0	58	46	0	0	0	0	0	249	0	1	0	134	74	0	0	0	0	1	7	0	30	1	0	0	0	0	99	0	2	5	0	0	0	0
WEL25	0	1	1	0	0	0	0	0	0	3754	0	0	0	1	0	0	0	0	10	0	0	0	14	8	2	0	0	2	0	1	0	0	0	0	0	3	2	11	1	0	0	3	0	7	0	0	0	0	0
WEL26	0	0	17	0	0	0	0	0	0	0	0	0	35	18	0	0	0	0	0	0	0	0	106	2	0	0	0	10	0	1	14	0	1	0	3	15	36	0	0	0	0	3	0	0	0	1	0	0	0
WF01	0	0	0	0	0	79	0	0	0	0	1	0	0	12	0	1	2	0	0	0	0	0	5	0	3	0	1	120	0	0	0	0	0	15	0	889	0	0	0	0	0	0	0	33	0	0	0	0	0
WF02	0	2	0	0	0	1	0	0	0	0	0	0	0	1	0	0	0	0	0	0	0	0	6	2	0	0	1	94	0	1	0	0	0	18	0	57	1	0	0	0	0	0	0	7	0	0	0	0	0
WF04	0	2	1	0	0	1	0	0	0	0	2	1078	1	150	0	0	0	0	0	0	0	1	146	1	0	0	0	116	0	0	0	0	1	7	0	915	0	0	0	0	0	0	0	80	0	1	0	0	0
WF05	2	19	2	0	0	0	0	0	0	1	94	2	2	7	12	0	0	0	0	0	0	0	6	1	0	0	0	198	0	1	1	0	2	13	0	70	0	0	0	0	0	0	0	99	0	0	0	1	0
WF06	0	1	0	0	0	0	0	0	0	0	7	2	0	4	0	0	0	0	0	0	0	0	9	0	0	0	0	111	0	0	0	0	0	13	0	312	0	0	0	0	0	1	0	36	0	0	0	0	0
WF07	0	2	2	0	0	0	0	0	0	9	1	1	0	131	0	0	0	0	3	0	0	0	146	1	0	0	1	189	0	0	1	0	0	1	0	671	1	0	0	0	0	0	0	28	0	0	0	0	0
WGP01	0	1	2	0	0	0	0	1	0	0	3	1	1	3	0	0	0	0	1	0	0	0	0	0	2	0	1	4	0	0	0	0	0	0	0	11	0	0	0	0	0	0	0	5	0	0	0	0	0
WGP02	0	2	3	0	0	0	0	30	0	0	46	0	0	1	0	1	0	0	1	0	0	0	4	0	0	0	0	36	0	0	1	0	0	1	0	5	2	0	0	0	0	0	0	1	0	0	2	0	0
WGP03	0	1	1	0	0	0	0	0	0	2	0	0	0	0	328	0	0	0	0	0	0	0	9	1	0	0	0	5	0	8	0	0	0	0	0	5	0	0	0	0	0	0	0	0	0	0	1	0	0
WGP04	1	1	0	0	0	1	0	0	0	4	0	2	0	1	0	0	0	0	0	0	0	0	1	1	0	0	0	1	0	1	0	0	0	0	0	29	0	0	0	0	0	0	0	50	0	1	0	0	0
WGP05	1	0	80	0	0	2	0	0	0	0	0	1	0	2	0	1	2	0	0	0	1	0	44	1	0	0	0	13	0	64	0	0	0	0	0	5	0	0	0	2	0	0	0	5	0	0	0	0	0
WGP06	0	2	0	0	0	0	0	13	1	0	0	5	0	1	0	0	1	9	0	0	0	0	12	0	0	0	0	1	1	1	0	0	2	0	6	1	0	0	0	0	0	0	0	1	0	0	0	0	0
WGP07	0	1	0	0	0	0	0	15	3	0	289	0	0	0	1	0	0	0	0	0	0	0	9	0	0	0	0	2	0	0	0	0	1	0	2	2	0	0	0	0	0	3	0	1	0	0	0	0	1
WGP08	0	1	0	0	0	0	0	0	0	1	0	1	0	10	0	0	0	0	0	0	0	0	9	0	0	0	0	4	0	0	0	0	0	0	0	17	0	0	1	0	0	0	0	9	0	0	0	0	0
WGP09	1	2	21	0	0	0	0	0	0	65	2	0	0	0	8	1	0	0	0	0	0	0	48	1	0	0	0	12	0	0	2	0	0	0	0	6	0	4	0	3	0	6	0	17	0	5	0	0	0
WGP10	0	0	6	0	0	1	0	5	1	5048	1	0	1	0	322	0	4	0	0	0	0	0	5	4	1	0	3	11	0	1	2	0	0	0	5	3	0	0	0	0	0	18	0	4	0	2	0	0	0
WGP11	0	1	12	0	0	0	0	0	0	9	1	0	6	0	524	0	3	0	0	0	5	0	1	1	1	0	0	6	0	1	0	1	0	0	0	2	0	0	1	0	0	0	0	2	0	0	0	0	0
WGP12	0	0	18	0	0	1	0	1	0	5	2	0	0	1	1	0	3	0	0	0	1	0	0	3	0	0	0	4409	0	0	1	2	0	2	0	3	0	0	0	0	0	0	0	17	0	4	0	0	0
WGP13	6	1	17	0	0	1	0	2	0	0	2	0	0	2	1	0	8	0	0	0	1	0	2	0	1	0	0	6	0	6	10	2	4	0	0	36	0	0	0	0	0	1	0	15	0	3	0	0	0
WGP14	5	0	12	0	0	0	0	0	0	16	200	0	0	1	29	0	0	0	0	0	0	0	1	1	0	0	0	117	0	4	0	0	0	15	0	113	0	0	0	0	0	1	0	1772	0	0	0	0	0
WGP15	0	2	11	0	0	0	0	0	0	1	15	0	0	1	0	0	10	0	0	11	0	4	10	0	1	0	0	338	4	0	2	6	0	0	0	6	0	0	0	0	0	0	0	6	0	3	0	0	0
WGP16	1	1	10	0	1	0	0	0	0	0	7	0	0	1	0	0	0	0	0	0	0	0	29	0	7	0	24	364	0	7	3	1984	0	12	0	29	7	0	0	0	0	1	0	7	0	0	0	0	0
WGP17	0	0	0	0	1	0	0	0	0	1	0	0	0	0	0	0	0	0	0	0	2	0	2	2	0	0	0	326	0	0	0	0	0	2	0	16	0	0	0	0	0	1	0	1	0	89	0	0	0
WGP18	0	1	0	0	2	0	0	0	0	12	0	0	0	0	0	4	0	0	0	0	0	4	2	1	0	0	0	179	0	5	3	0	0	30	0	6	0	0	0	0	0	2	0	1	0	0	0	0	5
WGP19	0	0	0	0	0	0	0	0	0	11	0	0	0	0	0	0	0	0	0	0	0	0	0	1	0	0	0	3	0	5	0	0	0	0	0	40	0	0	2	0	0	2	0	29	0	0	0	0	0
WGP20	0	2	1	0	0	0	0	0	0	1	0	0	0	0	0	0	0	0	0	0	0	0	2	1	0	0	0	264	0	0	0	0	0	1	0	84	1	0	1	0	0	0	0	17	0	0	0	0	0
WiW01	0	1	0	0	0	0	0	121	0	0	53	0	0	1	1	0	0	0	0	0	0	0	24	1	0	0	1	2753	9	0	0	0	1	1	0	9	0	0	0	0	0	8	0	3	0	0	0	0	0
WiW02	0	2	4	0	0	0	0	2	0	0	0	3	0	1	0	0	0	0	0	0	0	0	6	0	0	0	0	261	0	19	0	0	0	8	0	6	0	0	0	0	0	4	0	9	0	0	0	1	0
WiW03	0	1	1	0	0	1	0	0	0	0	0	2	0	3	0	1	0	0	0	0	0	0	3	0	1	0	1	43	0	12	0	0	0	21	0	71	0	0	0	0	0	0	0	52	0	0	0	0	0
WiW04	0	0	6	0	0	0	0	0	0	0	3	0	0	1	0	0	14	0	0	0	0	0	1	0	0	0	1	125	0	1	0	0	3	10	0	12	1	0	0	4	0	0	0	116	0	1	0	0	0
WiW05	0	0	0	0	0	0	0	0	0	1	0	1	0	2	1	0	4	1	0	0	0	0	9	0	0	0	0	166	0	0	0	0	0	17	0	18	0	0	0	0	0	0	0	17	0	0	0	0	0
WiW06	0	2	7	0	0	0	0	0	0	0	0	0	0	2	0	12	0	21	0	0	0	0	29	0	6	0	0	29	0	6	0	0	0	8	0	29	0	0	0	0	0	0	0	48	0	0	0	0	0
WiW07	0	0	0	0	0	0	0	0	0	2	1	0	17	3	73	0	0	0	0	0	0	0	60	0	0	0	1	39	0	0	0	0	0	13	0	12	1	0	0	254	0	11	0	5	0	0	0	0	0
WiW08	0	2	2	0	0	0	0	2	0	1	0	0	0	1	1	0	1	0	0	0	0	0	10	0	0	0	0	133	2	2	0	0	0	10	0	134	0	0	0	1	0	4	0	82	0	0	0	0	0
WiW09	1	0	14	0	0	0	0	1	0	3	1	0	0	1	0	0	4	0	0	0	0	0	55	1	0	0	0	425	0	0	0	1	0	4	0	472	0	0	0	0	0	0	0	12	0	0	0	0	0
WiW10	0	0	14	0	0	0	0	0	0	4	1	0	0	12	0	0	0	0	0	0	0	0	4	0	0	0	0	256	0	1	0	2	0	2	0	4	0	0	0	0	0	3	0	7	0	0	0	0	0
WiW11	1	0	16	0	0	0	0	2	5	4	1	0	0	1	0	0	0	1	0	0	0	0	19	0	0	0	0	150	0	0	8	0	0	4	0	16	0	0	0	0	0	27	0	29	0	2	0	0	0
WiW12	0	0	13	0	0	0	0	0	0	1	1	0	0	4	1	0	16	0	0	0	0	0	41	0	0	0	0	187	0	0	0	0	0	2	0	74	0	0	0	0	0	0	0	39	0	0	0	0	0
WiW13	1	0	12	0	0	0	0	0	0	4	2	0	0	0	0	0	1	0	0	0	1	0	21	1	2	0	1	122	0	0	1	2	8	2	0	7	0	0	0	0	0	2	0	11	0	0	0	0	0
WiW14	0	0	14	0	0	0	0	0	0	1	1	0	0	24	0	0	0	0	0	0	1	0	9	0	2	0	1	135	0	0	1	2	0	10	0	13	0	0	0	0	0	1	0	101	0	0	0	0	0
WiW15	1	0	11	0	0	0	0	0	0	1	7	0	0	3	1	0	3	0	1	0	0	0	34	0	0	0	0	342	0	0	3	2	0	1	0	2	0	0	0	0	0	1	0	6	0	1	0	0	0
WiW16	1	0	23	0	0	0	0	0	0	3	6	0	0	0	0	0	2	0	1	0	0	0	13	1	1	0	0	76	0	1	3	3	0	6	0	122	0	2	0	0	0	4	0	22	0	5	0	0	8
WiW17	0	0	34	0	0	0	0	0	0	0	1	3	0	0	0	4	0	0	0	7	0	0	22	0	6	0	0	72	0	3	0	0	0	14	0	14	0	0	0	2	0	3	0	3	0	0	0	0	0
WiW18	1	0	6	0	0	0	1	0	0	2	0	0	0	2	0	0	0	0	0	1	0	0	373	0	1	0	0	58	0	0	75	0	2	0	0	44	2	0	0	0	0	83	0	67	0	0	0	2	0
WiW19	0	0	16	0	2	1	0	0	0	30	0	5	0	24	0	0	0	0	2	1	0	0	1	0	0	0	1	53	0	0	1	0	0	4	0	20	1	0	0	0	0	1	3	622	0	0	0	0	0
WiW20	0	0	11	0	0	0	0	0	0	4	0	3	0	1	0	0	0	0	0	1	0	0	1	0	3	0	0	2	0	2	0	0	0	0	0	16	1	0	1	0	0	0	0	5	0	0	0	1	0
WiW21	0	0	13	0	0	0	0	0	0	0	0	1	0	2	0	0	0	0	0	0	0	0	5	0	0	0	0	71	2	1	0	0	0	26	0	1123	3	0	1	0	0	0	0	12	0	0	0	1	0
WiW22	0	0	10	0	0	0	0	0	0	3	0	1	0	0	0	0	0	0	0	0	0	0	4	0	1	0	0	183	0	1	0	0	0	7	0	168	1	0	1	0	0	1	0	2	0	0	0	0	0
WiW23	0	0	51	0	0	1	0	0	0	3	0	3	0	3	0	6	0	0	0	2	9	0	45	0	0	0	0	22	10	8	0	0	0	0	0	21	0	0	0	12	0	0	0	5	0	0	0	1	0
WiW24	1	1	44	0	0	0	0	0	0	0	9	0	0	0	0	2	0	0	0	0	0	0	30	0	3	0	0	97	0	12	2	0	0	3	0	37	0	0	0	0	0	5	0	1289	0	0	0	0	0
WiW25	0	0	0	0	0	1	0	0	0	0	64	0	0	91	0	4	0	0	0	0	0	0	3	0	0	0	1	25	0	1	4	0	0	4	0	1856	0	0	0	0	0	0	0	105	0	0	0	0	0
WiW26	0	0	8	0	0	0	0	0	0	0	1	0	0	1	0	0	16	0	0	0	0	0	4	1	0	0	0	56	0	5	0	0	0	24	0	7	0	0	0	0	0	14	0	0	0	0	0	0	0
WiW27	0	0	6	0	0	1	1	0	0	0	0	0	0	0	0	0	8	0	0	0	2	0	7	1	0	0	0	173	0	1	1	0	0	20	0	5	0	0	0	2	0	1	0	1	0	0	0	1	0
WiW28	0	0	0	0	0	0	0	0	0	0	1	0	0	3	0	1	0	0	0	0	0	0	1	0	0	0	0	57	0	12	1	0	0	15	0	2334	1	0	0	0	0	1	0	10	0	0	0	0	0
WiW29	0	0	1	0	0	0	0	0	0	0	0	0	0	0	0	0	0	1	1	0	0	0	10	0	1	0	3	174	0	0	1	0	0	13	0	882	0	0	0	0	0	0	0	19	0	0	0	0	0
WiW30	0	0	49	0	0	0	0	0	0	0	0	0	0	1	0	0	0	0	0	0	0	0	45	0	0	0	0	12	0	0	0	0	1	0	0	8	0	0	0	55	0	0	0	0	0	0	3	0	0
WiW31	0	0	4	0	0	1	0	0	0	0	1	0	0	0	0	0	0	0	1	0	0	0	14	2	0	0	3	118	0	0	3	0	0	13	0	8	0	0	0	0	0	0	0	7	0	0	0	0	0
WiW32	0	0	13	0	0	4	0	0	0	0	1	0	0	1	0	0	4	2	0	0	0	0	34	1	0	0	0	79	0	0	0	0	0	43	0	5	0	0	0	0	0	0	0	14	0	0	0	0	0
WiW33	0	0	56	0	0	0	1	0	0	0	3	0	0	1	0	0	6	0	0	0	0	0	58	0	0	0	0	142	0	0	18	0	0	12	0	1661	0	0	0	0	0	0	0	9	0	0	0	0	0
WiW34	0	0	30	0	0	0	0	30	2	0	1	0	6	669	0	0	1	1	1	0	0	0	22	0	0	0	0	4	0	0	5	0	0	0	0	22	0	0	0	0	0	268	0	34	0	0	0	0	0
WiW35	0	0	21	0	0	0	0	0	0	0	0	0	0	13	0	0	0	0	0	0	0	0	42	0	0	0	0	343	0	4	0	0	0	1	1	2	0	0	0	0	0	0	0	0	0	0	0	0	0
WiW36	0	0	4	0	0	0	0	0	0	0	0	0	0	3	0	0	3	1	0	1	0	0	15	0	0	0	1	216	0	0	0	0	0	4	0	1610	0	0	0	0	0	0	0	49	0	0	0	0	0
WiW37	0	0	590	0	1	0	0	0	0	0	0	0	0	1	0	0	0	0	0	0	0	0	445	0	0	0	0	4	0	0	0	0	0	0	0	12	1	3	0	0	0	0	0	29	0	0	0	0	0
WiW38	0	0	2	0	0	0	0	0	0	0	0	0	0	1	0	0	0	0	0	1	0	0	4	0	0	0	0	236	0	0	0	0	0	10	0	148	0	0	0	0	0	0	0	2	0	0	0	0	0
WiW39	0	0	0	0	0	0	0	0	0	0	0	0	0	0	0	2	0	0	0	0	0	0	13	0	0	0	1	471	0	0	0	0	0	1	0	291	0	0	0	0	0	0	0	5	0	0	0	0	0
WiW40	0	1	2	0	0	3	0	0	0	0	0	0	0	0	0	0	0	0	0	0	0	0	15	0	0	0	3	310	15	0	0	0	11	1	0	7	0	0	0	0	0	0	0	0	0	0	0	0	0
WiW41	0	0	25	0	0	2	0	0	0	0	0	0	0	0	0	0	7	1	0	0	0	0	13	0	0	0	16	138	0	0	0	0	0	3	0	25	0	0	0	0	0	2	0	23	0	0	0	0	0
WiW42	0	0	53	16	0	2	0	0	0	0	2	0	2	5	0	0	0	2	0	0	0	0	40	0	10	0	0	12	0	0	0	0	0	3	0	1229	1	0	0	0	0	117	77	1150	0	0	5	0	0
WiW43	0	0	4	0	0	3	0	0	0	0	0	0	1	2	0	0	0	0	0	0	0	0	4	0	0	0	1	105	0	2	0	0	0	9	0	403	0	0	0	0	0	0	0	370	0	0	0	0	0
WiW44	0	0	0	0	0	0	0	0	0	0	1	3	0	0	0	0	0	0	0	0	0	0	21	0	0	0	0	375	0	0	0	0	0	31	0	33	0	0	0	0	0	0	0	1	0	0	0	0	0
WiW45	0	0	4	0	0	2	0	8	6	0	0	0	7	24	0	0	0	0	0	0	0	0	13	0	0	0	0	65	0	1	3	0	0	6	0	1326	0	0	0	0	0	72	0	23	0	0	9	0	0
WiW46	0	0	4	0	0	1	0	0	0	0	0	0	0	0	0	0	0	0	0	0	0	0	1	0	0	0	0	61	0	0	0	0	0	21	0	57	0	0	0	0	0	0	0	1	0	0	0	0	0
WiW47	0	0	1	0	0	2	0	0	0	0	0	0	0	15	0	0	3	1	0	0	0	1	13	0	0	0	0	80	0	0	0	0	0	5	0	888	0	0	0	0	0	0	0	36	0	3	0	0	0
WiW48	0	0	3	0	0	0	0	0	0	0	0	0	0	39	0	0	1	0	0	0	0	0	3	0	1	0	4	902	0	0	0	0	0	76	0	318	0	0	0	0	0	0	0	53	0	0	0	0	0
WiW49	0	0	66	0	0	0	0	0	0	1	0	0	0	0	14	0	0	0	0	0	0	0	54	0	0	0	0	19	0	0	1	0	0	40	0	10	0	0	0	0	0	0	1	1	0	0	0	0	0
WiW50	0	0	0	0	0	2	0	0	0	3	2	0	1	1	0	0	2	0	0	0	6	0	2	0	0	2	0	46	0	0	0	0	0	9	1	26	0	0	0	0	0	1	1	21	0	17	0	0	0
WiW51	0	0	0	0	0	0	0	0	0	0	0	0	0	57	0	0	0	0	0	0	0	0	9	0	0	0	0	18	0	0	0	0	0	4	0	14	0	0	0	0	0	0	0	4	0	5	0	0	0
WiW52	0	0	1	0	0	1	0	0	0	0	1	0	0	99	0	3	0	0	0	0	0	0	2	0	5	0	0	61	0	0	0	0	0	24	0	1386	0	0	0	0	0	1	0	21	0	0	0	0	0
WiW53	0	0	1	0	0	0	0	0	0	1	0	0	0	16	1	42	0	0	0	0	0	0	65	0	0	0	0	9	0	0	0	0	0	5	1	184	0	0	0	0	0	0	1	3	0	0	0	0	0
WiW54	0	0	0	0	0	0	0	0	0	1	0	0	0	1	50	1	1	0	0	0	0	0	8	0	0	0	0	313	0	0	1	0	0	33	0	1216	0	0	0	0	0	0	2	5	0	0	0	0	0
WiW55	0	0	0	0	0	1	0	0	0	1	12	0	0	32	1	0	0	0	0	0	0	0	3	0	2	0	0	4753	0	3	0	0	0	5	0	38	0	0	0	0	0	1	0	43	0	1	0	0	0
WiW56	1	0	0	0	0	0	0	0	0	0	0	0	0	103	2	1	0	0	0	0	1	0	0	0	0	0	0	545	0	0	0	0	0	5	0	17	0	0	0	1	0	0	1	527	0	0	0	0	0
WiW57	0	0	35	0	0	2	0	0	0	0	1	0	0	1	0	0	14	0	0	0	0	0	47	0	0	0	0	27	0	0	6	0	10	3	0	3956	0	0	0	0	0	0	0	21	0	0	0	0	0
WP01	1	0	29	0	2	1	0	0	0	4	127	0	0	0	1	0	2	0	0	0	0	0	34	0	2	0	0	5416	0	0	7	0	0	2	0	354	0	0	0	0	0	0	0	3	0	0	0	0	0
WP02	1	0	14	0	0	1	0	0	0	3	2	0	1	0	0	0	0	0	0	0	0	0	7	0	2	0	5	278	0	1	0	0	0	1	0	11	0	0	0	0	0	1	0	17	0	1	0	0	0
WP03	3	0	14	0	0	0	0	0	0	8	3	0	0	1	14	0	3	0	0	0	1	0	2	0	1	0	2	198	0	0	0	0	0	2	0	14	0	0	0	0	0	1	0	13	0	1	0	0	0
WP04	0	1	51	0	0	0	0	0	0	3594	0	0	1	1	1	1	1	0	0	0	0	0	128	2	1	0	0	164	0	0	0	0	0	1	0	11	0	0	0	0	0	0	0	6	0	3	0	0	0
WP05	0	1	33	0	0	1	0	10	7	5	2	0	10	0	0	0	2	0	0	0	0	0	32	0	0	0	7	177	0	0	7	0	0	1	0	3	0	0	0	0	0	116	0	8	0	0	0	0	0
WP06	0	1	13	0	1	0	0	4	1	4	205	0	1	0	0	0	2	0	0	0	0	0	3	0	0	1	0	39	0	0	2	1	0	2	0	33	2	0	0	0	1	63	0	54	0	0	0	0	0
WP07	0	0	11	0	2	0	0	0	0	2	2	0	0	0	0	0	18	0	0	0	1	0	15	0	0	0	0	287	0	0	8	0	0	0	0	11	0	0	0	0	0	0	0	8	0	2	0	0	0
WP08	0	2	33	0	0	1	0	0	0	3	3	0	0	1	0	0	0	0	0	0	0	0	208	4	1	0	0	21	0	1	188	1	0	0	0	16	0	0	0	0	0	0	0	11	0	2	0	0	0
WP09	0	0	16	0	0	0	0	0	0	0	2	0	0	2	0	0	0	0	0	0	0	0	1328	0	0	0	0	10	0	0	6	0	0	0	0	19	0	0	0	0	0	1481	0	102	0	0	0	0	0
WP10	0	0	6	0	0	0	0	0	0	15	1	0	0	1	0	0	1	0	0	0	0	0	35	0	0	0	0	187	0	0	0	0	1	0	0	7	0	0	64	10	0	16	1	0	0	0	0	0	0
WP11	0	0	5	0	0	0	0	0	0	2	0	0	0	0	0	0	0	0	0	0	0	0	24	0	0	0	0	220	0	7	0	0	0	1	0	4	0	0	0	0	0	9	0	0	0	0	0	0	0
WP12	1	0	1	0	0	0	0	48	0	0	89	0	118	0	0	0	0	0	0	0	1	0	552	0	6	0	0	30	0	0	1	0	0	0	0	2	0	0	0	0	0	24	0	0	0	0	0	0	0
WP13	0	0	6	0	0	0	0	0	0	3	0	0	2	0	0	14	0	0	0	0	0	0	83	0	0	0	0	1	0	0	3	0	0	1	1	1	0	0	1	0	0	0	0	7	0	0	0	0	0
WP14	0	0	6	0	0	0	0	1	1	9	1	0	0	7	255	0	0	0	0	0	0	51	58	0	3	0	0	4	0	0	0	0	0	0	0	0	0	0	0	0	0	2	1	0	0	0	0	0	0
WP15	0	0	15	0	0	196	0	42	0	2	2	0	0	295	4	0	0	0	0	0	0	0	276	0	1	0	0	4	0	0	64	0	0	1	0	1	0	0	0	0	0	30	0	1	0	0	0	0	0
WP16	0	0	15	0	0	0	0	1	0	1	1	0	31	0	0	0	1	0	0	0	0	0	986	0	165	0	598	1	0	0	3	0	0	0	0	3	0	0	0	0	0	39	0	9	0	1	1	0	0
WYC01	0	0	10	0	0	0	1	0	0	2	3	0	1	225	0	0	5	0	0	0	0	0	54	0	1	0	0	184	0	38	1	0	0	2	0	2	0	0	0	0	0	1	0	6	0	0	0	0	0
WYC03	0	0	20	0	0	0	1	0	0	1	1	0	0	3	0	9	0	0	0	0	0	0	12	0	0	0	0	75	0	25	1	0	0	22	0	2	13	0	0	0	0	0	0	0	0	0	0	0	0
WYC04	0	0	16	0	0	0	0	8	0	1	5	0	0	3	0	1	0	0	0	0	0	0	5	0	3	2	0	148	0	7	1	0	0	13	0	6	1	0	0	0	0	10	1	4	0	38	0	0	0
WYC05	0	0	7	0	0	1	0	0	0	0	1	0	14	7	0	0	0	0	0	0	0	0	30	0	0	0	0	272	0	0	0	0	0	2	0	2	0	0	0	0	0	63	0	3	0	0	0	0	0
WYC06	0	0	22	0	0	0	0	1	0	0	1	0	0	0	0	0	0	0	0	0	0	0	6	0	2	0	3	3	0	2	0	0	0	0	0	1	0	0	0	0	0	0	0	1	0	1	0	0	0
WYC07	0	0	18	0	0	0	0	0	0	0	3	0	0	5	0	7	0	0	0	0	0	0	20	0	0	0	0	229	0	0	0	0	0	12	0	1	30	0	0	0	0	3	0	1	0	0	0	0	0
WYC08	0	0	13	0	0	0	0	0	0	0	0	0	605	110	0	0	1	0	0	0	1	0	221	0	1	0	0	15	1	428	12	0	1	0	0	8	0	0	0	0	0	483	0	5	0	0	0	0	0
WYC09	1	0	11	0	0	0	0	0	0	1	2	0	2	4	0	1	0	0	0	0	0	1	6	0	2	0	0	283	0	4	0	0	0	4	0	3	0	0	0	0	0	0	0	2	0	0	0	0	0
WYC10	0	0	8	0	0	0	0	0	0	1	3	0	0	0	0	0	0	0	0	0	0	0	16	0	1	0	0	164	0	6	0	0	0	3	0	0	0	0	0	0	0	0	0	0	0	1	0	0	0
WYC11	1	0	11	0	0	0	0	0	0	1	0	0	0	1	0	0	1	0	0	1	0	0	7	0	0	0	0	124	0	1	0	0	0	9	0	5	1	0	0	0	0	0	0	12	0	2	0	0	0
WYC12	0	0	9	0	0	0	0	3	0	4	1	0	0	0	0	0	2	0	0	0	0	0	3	0	0	0	0	45	0	1	0	0	0	14	0	2	1	0	0	0	0	0	0	1	0	0	0	0	0
WYC13	1	0	12	0	0	0	0	0	0	2	1	0	0	4	0	0	0	0	0	0	0	0	6	0	2	0	0	862	0	9	0	0	3	24	0	1	0	0	0	0	0	0	1	1	0	0	0	0	0
WYC16	0	0	23	0	0	0	0	0	0	2	0	0	7	0	0	0	5	0	0	0	0	1	26	0	15	0	9	86	0	17	0	0	0	48	0	1	1	0	1	0	0	1	0	0	0	0	0	0	0
WYC17	0	0	11	0	0	0	0	1	0	894	6	0	1	1	1	0	0	0	0	0	0	0	12	0	0	0	0	39	0	3	0	0	0	7	0	6	0	0	2	0	2	3	0	10	0	0	0	0	0
WYC18	0	0	27	0	0	0	0	0	0	2	3	0	0	0	0	0	0	0	0	0	0	0	26	0	0	0	0	273	0	0	1	0	0	6	0	0	3	0	0	0	0	0	0	0	0	0	0	0	0
WYC19	1	0	10	0	0	0	0	0	0	2	0	0	2	2	0	0	0	0	0	0	0	0	17	0	1	0	0	7073	0	0	0	0	0	3	0	5	0	0	0	0	0	0	0	6	0	0	0	0	0
WYC20	0	0	13	0	0	2	0	0	0	1	1	0	1	0	0	0	0	0	0	0	0	0	1	0	2	0	1	73	0	3	1	0	0	39	0	0	0	0	0	0	0	1	0	0	0	0	0	0	0
WYC21	0	0	6	0	0	0	0	0	0	1	4	0	0	0	0	0	0	0	0	3	0	0	7	0	0	0	0	278	0	1	0	0	0	8	0	0	0	0	0	2	0	0	0	1	0	0	0	0	0
WYC22	0	0	30	15	0	0	0	0	0	1	0	0	0	2	1	0	0	0	0	0	0	0	30	0	1	0	0	74	0	1	0	0	0	45	0	0	0	0	0	0	0	0	0	0	0	0	0	0	0
WYC23	0	0	15	0	0	0	0	1	0	9	2	0	1	0	18	0	0	0	0	0	0	0	3	0	3	0	0	1	0	3	2	0	0	0	0	0	0	0	0	0	0	1	0	2	0	0	1	0	0
WYC24	0	0	14	0	0	0	0	0	0	1	1	0	0	4	0	7	0	0	0	0	0	0	1	0	0	0	0	183	0	0	2	0	1	25	0	0	0	0	0	0	0	6	0	0	0	0	0	0	0
WYC25	0	6	1	0	1	1	0	0	0	0	0	0	0	0	0	1	0	0	1	0	0	0	5	2	2	0	0	188	0	1	0	0	0	0	0	2	1	0	0	0	0	0	0	0	0	1	0	0	0
WYC27	0	2	1	0	0	0	0	0	0	0	1	0	0	0	0	3	1	0	0	0	0	0	16	0	0	0	5	174	0	7	0	0	0	0	0	10	0	0	0	0	0	2	0	1	0	0	0	0	0
WYC28	0	0	926	0	0	0	0	0	0	1	0	0	0	21	0	24	0	0	0	0	1	0	346	1	0	0	130	0	0	189	0	0	276	0	0	6	0	0	0	0	0	1	0	102	0	0	0	0	0
WYC29	0	1	3	0	0	0	0	0	0	0	0	0	0	10	0	1	0	0	0	0	0	0	37	7	2	0	0	8	0	0	2	0	0	0	0	1	8	0	0	0	0	0	0	2	0	1	0	0	0
WYC30	0	0	1	0	1	0	0	0	0	0	0	0	0	2	0	0	0	0	0	0	0	0	2	0	0	0	0	279	0	0	1	0	0	1	0	3	0	0	0	0	0	0	0	0	0	0	0	0	0
WYC31	0	1	46	0	0	1	0	0	0	1	0	0	0	13	0	1	0	0	0	0	0	0	49	1	17	44	0	9	0	39	0	0	0	1	0	4	0	66	0	0	0	0	0	5	0	0	0	0	0
WYC32	1	3	1	0	0	0	0	0	0	0	0	0	0	54	0	80	28	0	0	0	0	0	368	3	0	0	0	5	0	0	0	0	0	0	0	16	0	0	0	0	0	0	0	1	0	0	0	0	0
WYC33	0	2	1	0	1	0	0	0	0	1	0	0	0	7	0	0	0	0	0	0	0	0	51	1	2	0	0	26	0	0	11	0	0	1	0	0	7	0	0	0	0	0	0	0	0	0	0	0	0
WYC34	0	0	0	0	0	0	0	0	0	0	0	0	0	1	1	0	0	0	0	0	0	0	23	1	0	0	0	11	0	0	0	0	0	0	0	2	1	0	0	0	0	0	0	1	0	3	0	0	0
WYC35	0	0	1	0	1	0	0	0	0	0	0	0	0	5	0	6	0	0	0	0	0	0	19	0	0	0	0	1	0	0	0	0	0	1	0	3	0	1	0	0	0	0	0	0	0	0	0	0	0
WYC36	0	2	306	0	1	0	0	0	0	1	0	0	0	56	1	0	0	0	1	0	0	0	500	1	0	0	0	2	5	1	0	0	3	0	0	12	1	0	1	0	0	0	0	1	0	2	0	0	0
WYC37	0	0	0	0	0	0	0	0	0	0	0	0	0	52	0	0	0	0	1	0	0	0	46	3	0	0	0	0	0	0	0	0	0	0	0	10	0	0	0	0	0	0	0	2	0	1	0	0	0
WYC38	0	1	1	1	1	0	0	2	0	1	0	0	1	0	0	0	0	0	0	0	0	0	1	3	0	0	0	4	0	2	0	0	0	0	0	2	0	0	0	0	0	0	0	0	0	1	0	0	0
WYC39	0	1	0	0	1	1	0	0	0	0	187	0	0	96	0	1	0	0	0	0	1	0	346	3	0	0	0	98	0	41	0	0	44	0	0	12	0	0	0	0	0	0	0	0	0	2	0	0	0
WYC40	0	0	4	0	0	0	0	0	0	1	0	0	0	0	0	1	0	0	0	0	0	0	2	1	0	0	0	492	0	9	0	0	0	0	0	1	2	0	0	0	0	8	1	1	0	1	0	0	0
WYC43	0	0	26	0	0	0	0	0	0	1	1	0	1	5	0	0	0	0	0	1	0	0	11	0	1	0	0	3	0	1	0	0	0	0	0	0	0	0	3	0	0	31	0	0	0	0	0	0	0
WYD01	0	7	3	0	0	0	1	0	0	0	53	1	0	18	0	1	0	0	0	0	0	0	2	4	1	0	1	52	0	0	0	0	0	16	0	19	0	0	0	2	0	1	0	9	0	0	0	0	0
WYD02	0	0	0	0	0	0	0	0	0	0	74	0	1	4	0	0	0	0	0	0	0	0	1	1	0	0	1	50	0	1	0	0	0	14	0	17	0	0	0	1	0	0	0	10	0	0	0	0	0
WYD03	0	1	0	0	0	0	0	0	0	0	32	1	0	182	0	0	0	6	0	0	0	0	11	1	0	0	0	32	0	0	0	0	0	1	0	87	1	0	0	0	0	0	0	36	0	0	0	0	0
WYD04	1	2	0	0	0	1	0	0	0	4	0	2	0	3	0	2	0	0	0	0	0	0	6	2	0	0	0	69	0	1	0	0	0	2	0	19	0	0	0	0	0	0	0	22	0	0	0	0	0
WYD05	0	1	0	0	0	0	0	0	0	272	1	0	0	0	1	1	0	0	0	0	0	0	2	0	0	0	0	43	0	0	0	0	0	14	0	29	0	0	0	0	0	1	0	28	0	0	0	0	0
WYD07	0	1	1	0	0	0	0	1	0	0	4	0	1	275	0	3	0	0	0	0	0	0	11	0	0	0	0	52	0	2	1	0	0	3	0	38	1	0	0	0	0	0	0	39	0	0	0	0	0
WYD08	0	0	0	0	0	1	0	0	0	1	0	0	0	0	0	0	0	0	0	0	0	0	2	0	0	0	0	371	0	1	0	0	0	1	0	6	0	0	0	0	0	0	0	5	0	0	0	3	0
WYD10	0	2	19	0	0	0	0	0	0	3	0	0	0	100	0	0	1	0	0	0	0	0	9	1	0	0	2	59	0	0	0	1	0	5	0	15	0	0	0	0	0	1	0	41	0	0	0	0	0
WYD11	0	0	12	3	0	0	0	0	0	1	3	0	0	72	0	0	0	0	1	0	0	0	5	0	0	0	0	73	0	0	0	0	1	0	0	24	0	0	0	0	0	0	0	25	0	1	0	0	0
WYD12	0	2	19	0	0	0	0	0	0	5	1	0	0	121	0	0	4	0	0	0	0	0	9	1	0	0	0	1440	0	0	5	2	0	3	0	22	0	0	0	0	0	0	0	20	0	0	0	0	0
WYM01	1	0	3	0	1	0	0	0	0	0	0	0	0	1	0	0	0	0	0	0	0	0	9	0	0	0	0	242	0	0	2	0	0	2	3	34	0	0	0	0	0	1	0	2	0	0	0	0	0
WYM03	0	1	2	0	1	0	0	0	0	90	2	1	0	2	0	1	0	0	0	0	0	0	3	0	0	0	0	172	0	1	2	0	0	1	0	5	3	0	0	0	0	2	0	3	0	0	0	0	0
WYM04	2	2	0	0	2	0	0	1	0	5055	0	0	0	2	1	0	0	0	0	0	0	0	4	0	0	0	0	13	0	7	0	0	0	0	3	3	2	0	0	0	0	0	0	0	0	0	0	0	0
WYM05	0	5	0	54	1	0	0	0	0	644	0	0	4	5	0	0	0	0	0	0	0	0	11	0	4	0	0	62	0	2	2	0	0	0	2	4	2	0	0	0	0	1	1	2	0	0	0	0	0
WYM06	0	23	0	2	0	0	0	0	0	7	3	0	121	124	1	0	0	0	0	1	1	0	33	0	2	0	0	1020	0	0	1	0	0	2	1	70	0	0	0	0	0	0	1	26	0	0	0	0	0
WYM07	0	0	0	0	2	0	0	0	0	1	51	0	7	44	0	0	1	0	0	0	0	0	2	0	24	0	0	24	0	0	1	0	0	1	3	1080	0	0	0	0	0	1	0	106	0	0	0	0	0
WYM08	1	0	2	0	0	0	0	0	0	3	3	0	0	2	0	3	0	0	0	0	0	0	5	0	0	0	0	171	0	0	1	0	0	7	0	141	0	0	0	1	0	35	1	6	0	0	0	0	0
WYM09	0	0	12	0	0	0	0	0	0	2	1	1	0	3	0	1	0	0	0	0	0	0	7	0	1	0	1	218	0	0	3	0	9	2	0	61	2	0	0	0	0	1	0	2	0	0	0	0	0
WYM10	0	1	7	0	0	0	0	0	0	4	0	1	0	3	0	0	0	0	0	0	0	0	0	0	0	0	0	345	0	0	0	0	0	2	0	12	1	0	0	0	0	1	0	6	0	0	0	0	0
WYM11	0	1	5	0	0	1	0	0	0	3	0	1411	0	113	0	0	0	0	0	1	0	0	1	0	2	0	1	1675	0	1	0	0	0	0	0	1555	3	0	0	0	0	1	0	16	0	1	0	0	0
WYM12	2	2	1	0	3	0	0	0	0	1	174	0	0	68	0	0	1	0	0	0	0	0	6	0	0	0	0	3	0	0	1	0	0	0	0	150	0	0	0	0	0	0	0	84	0	2	0	0	0
WYM13	1	3	1	0	2	0	0	5	0	12	0	0	24	1	16	0	0	3	1	0	0	0	3	2	5	0	1	36	0	3	0	0	0	0	0	10	1	0	0	0	0	5	0	33	0	16	2	0	0
WYM14	1	1	0	0	0	0	0	0	0	117	0	0	0	1	0	0	0	0	0	0	0	0	2	1	0	0	0	491	0	4	1	0	1	0	0	27	1	0	1	0	0	1	0	19	0	0	0	0	0
WYM15	0	0	0	0	644	0	0	0	0	2	0	0	0	1	0	0	0	0	0	0	0	0	1	3	0	0	0	178	0	0	0	0	0	3	0	970	0	0	3	0	0	0	0	33	0	13	0	0	0
WYM16	0	2	1	0	0	0	0	0	0	0	0	0	0	1	0	13	0	0	0	0	0	1	1	4	1	0	0	3939	0	10	0	0	0	0	0	2	0	0	0	0	0	18	0	0	0	1	0	0	0
WYM17	0	0	3	0	0	0	0	0	0	0	4	0	0	3	0	1	0	0	0	0	0	0	22	0	2	0	0	315	0	0	0	0	2	1	0	7	0	0	0	0	0	0	1	421	0	0	0	0	0
WYM18	0	0	4	0	0	0	0	0	0	0	0	0	0	2	0	0	0	276	0	0	0	0	0	0	0	0	0	506	0	0	0	0	0	5	0	15	1	0	0	0	0	0	0	8	0	0	0	0	0
WYM19	0	0	0	0	0	0	0	0	0	13	0	5	0	2	0	0	0	0	0	1	0	0	0	0	0	0	0	300	0	0	0	0	0	9	0	14	1	0	0	0	0	0	0	4	0	0	0	0	0
WYM20	0	0	7	0	0	0	0	0	0	10	0	6	0	2	0	10	0	1	0	0	0	0	13	0	0	0	0	38	0	3	0	0	0	0	0	9	0	1	0	0	0	0	0	1	0	1	0	0	0
WYM24	0	0	0	0	4	0	0	0	0	36	6	0	0	1	1	0	0	3	0	0	0	0	3	0	0	0	0	121	0	1	1	0	0	21	0	14	0	0	0	0	0	0	0	1	0	1	0	0	0
WYM26	0	0	0	0	0	0	0	0	0	1	0	0	0	1	1	0	0	0	0	0	0	0	9	0	0	0	0	383	0	0	0	0	0	1	0	14	0	0	0	0	0	0	0	13	0	1	0	0	0
WYM28	0	0	8	0	0	0	0	0	0	0	2	0	0	0	0	0	0	0	0	0	0	0	22	0	0	0	0	176	0	0	0	0	0	2	0	23	7	0	0	5	0	15	1	16	0	41	0	0	0
WYM30	0	1	1	0	0	0	0	0	0	0	0	0	0	2	0	0	0	0	0	0	0	0	6	0	1	0	3	4137	0	0	0	0	0	18	0	9	0	0	0	0	0	8	0	8	0	0	0	0	0
WYM31	0	0	1	0	8	0	1	0	0	0	1	0	0	5	0	6	0	0	0	0	1	0	6	0	3	0	6	434	0	2	0	0	0	12	0	34	0	0	0	0	0	0	0	30	1	0	0	0	0
WYM32	0	1	3	0	0	4	0	0	0	0	0	0	0	83	0	0	0	2	0	0	0	0	4	0	21	0	0	51	0	0	0	0	0	7	0	16	0	0	0	0	0	2	0	2	0	0	0	0	0
WYM34	0	0	2	0	0	1	0	0	0	1	6	0	0	19	0	2	0	0	0	0	0	0	1	0	4	0	0	158	0	0	0	1	0	14	0	145	0	0	0	0	0	1	0	41	0	0	0	0	0
WYM35	0	1	4	0	0	0	0	0	0	62	0	2	0	0	0	0	0	0	0	0	0	0	12	1	0	0	7	128	0	0	0	0	0	13	0	242	0	0	0	0	0	1	0	1	0	0	0	0	6
WYM36	0	0	1	0	0	1	0	0	0	3	0	0	0	0	0	0	0	0	0	0	0	0	6	0	0	0	0	293	0	4	1	0	0	3	0	187	0	0	0	0	1	0	0	11	0	0	0	0	0
WYM37	0	0	0	0	0	1	0	0	0	212	208	0	0	57	0	0	0	1	0	0	0	0	5	0	1	0	1	217	0	4	1	0	0	2	0	761	0	0	0	0	0	0	0	14	0	0	0	0	0
WYM38	0	0	14	0	1	1	0	0	0	0	1	0	0	0	0	0	0	0	0	0	1	0	13	1	0	0	4	3	0	0	0	0	0	0	0	24	0	0	0	0	0	0	0	17	0	0	0	0	0
WYM40	1	74	1	0	1	3469	0	0	0	0	302	0	0	4	0	0	0	1	0	0	0	0	5	0	0	0	0	52	0	1	1	0	0	9	0	460	0	0	0	0	0	1	0	19	0	0	0	0	0
WYM41	0	0	0	0	19	2	0	0	0	0	63	0	0	16	0	4	0	2	0	22	0	0	6	0	0	0	0	25	0	0	0	0	1	5	0	10	0	0	0	0	0	2	0	5	0	0	0	0	0
WYM42	0	0	0	0	0	2	0	0	0	0	1	0	0	5	0	1	0	385	0	0	0	0	3	1	0	0	0	248	0	0	1	0	0	1	0	6	2	0	0	0	0	1	0	0	0	0	0	0	0
WYM43	0	0	1	0	0	1	1	0	0	1	1	0	0	2	0	1	0	2	0	0	0	0	4	0	0	0	1	18	0	1	0	0	0	4	0	75	3	0	0	0	1	2	0	2	0	0	0	0	0
WYM44	0	0	0	0	0	1	0	0	0	0	0	0	8	60	0	0	0	119	0	0	0	0	17	0	0	0	8	6754	0	7	5	0	0	3	0	174	2	0	0	0	0	0	0	11	0	15	0	0	0
WYT01	0	0	13	0	0	0	0	0	0	0	1	0	0	0	0	0	0	0	0	0	0	0	3	0	1	0	1	182	0	2	0	0	4	4	0	230	0	0	24	0	0	0	0	9	0	0	0	0	0
WYT02	0	1	20	0	0	0	0	0	0	0	6	0	0	0	1	0	0	0	0	0	0	0	1	0	5	0	10	49	0	3	0	0	0	5	0	275	0	0	0	2	0	0	0	10	0	0	0	0	0
WYT03	0	0	23	0	0	0	0	0	0	3	0	0	0	0	0	5	0	0	0	0	0	0	20	0	1	0	0	4	0	1	0	0	0	1	0	27	0	0	0	0	0	0	0	1	0	2	0	0	0
WYT04	0	0	17	0	0	0	0	0	0	1	3	0	0	1	0	0	0	0	0	0	0	0	4	0	0	0	5	302	0	0	0	0	0	0	0	1893	0	0	0	0	0	0	0	30	0	0	0	0	0
WYT05	0	0	17	0	0	0	0	0	0	0	1	0	0	23	0	0	0	0	0	0	0	0	6	0	0	0	1	125	0	0	0	0	0	10	0	2038	0	0	0	1	0	0	1	25	0	0	0	0	0
WYT06	0	0	16	0	0	0	0	0	0	0	113	0	0	0	0	1	0	0	0	0	0	0	3	0	0	0	0	312	0	1	0	0	0	13	0	75	1	0	0	1	0	1	1	10	0	0	0	0	0
WYT07	0	0	21	0	0	0	0	0	0	0	159	0	0	4	0	0	0	0	0	0	0	0	1	0	1	0	0	220	0	1	0	0	0	12	0	178	0	0	0	0	0	0	0	6	0	0	0	0	0
WYT08	0	0	15	0	0	0	0	0	0	0	0	0	0	1	0	2	0	0	0	0	0	0	9	0	0	0	0	197	0	0	0	1	0	27	0	15	0	0	0	0	0	0	0	3	0	1	0	0	0
WYT09	1	0	15	0	7	0	0	0	0	0	0	0	0	1	0	0	0	0	0	0	0	0	2	0	2	0	0	12	0	0	1	0	1	1	0	44	0	0	0	0	0	0	0	1	0	0	0	0	0
WYT10	2	0	11	0	0	0	0	1	0	1	1	0	0	6	1	0	1	0	0	0	0	0	3	0	1	0	1	162	1	0	1	0	0	6	0	701	0	0	0	0	0	2	0	9	0	0	0	0	0
WYT100	0	5	11	0	0	1	0	14	0	1	10	0	0	2	0	0	0	0	1	0	0	0	21	0	13	0	0	133	0	0	0	0	0	10	0	16	0	0	0	0	0	0	0	17	0	10	0	0	0
WYT101	0	1	1	0	0	0	0	0	0	1	0	0	0	0	0	0	0	0	0	0	0	0	158	0	0	0	0	194	0	0	24	0	0	0	0	2	0	0	0	0	0	0	0	1	0	0	0	0	0
WYT102	0	0	34	0	1	0	0	0	0	0	0	0	0	0	0	0	0	0	0	0	0	0	30	2	0	0	0	292	0	0	0	0	21	2	0	7	0	0	0	0	0	0	0	2	0	0	0	0	0
WYT103	0	1	1	0	0	1	0	0	0	1	0	0	0	6	0	3	0	0	0	0	0	0	6	0	0	0	0	79	0	1	0	0	0	5	0	608	0	0	0	0	0	0	0	11	0	0	0	0	0
WYT104	0	1	3	0	3	1	0	0	0	0	1	0	0	2	0	1	8	1	0	0	0	0	2	0	0	0	0	570	0	4	0	0	0	9	0	103	0	0	0	0	0	0	0	2	0	1	0	0	0
WYT105	0	1	13	0	93	0	0	0	0	0	1	0	0	1	0	0	0	0	0	0	0	0	17	1	0	0	0	32	0	1	0	0	0	5	0	2811	0	0	0	0	0	0	0	21	0	0	0	0	0
WYT106	0	0	5	0	0	0	0	1	0	2	10	0	0	0	0	0	0	1	0	0	0	0	25	0	0	0	9	227	0	1	0	0	0	3	0	50	2	0	0	0	0	0	0	5	0	1	0	0	0
WYT107	0	0	6	0	1	1	0	0	0	3	1	0	0	1	0	3	0	0	2	0	0	0	3	1	0	0	0	105	0	1	0	0	0	11	0	20	0	0	0	0	0	0	0	4	0	1	0	0	0
WYT108	0	0	6	0	0	0	0	0	0	1	1	0	0	2	0	0	4	0	0	0	0	0	8	0	1	0	0	4689	0	0	0	0	0	3	0	11	0	0	0	0	0	0	0	7	0	0	0	0	0
WYT109	1	1	3	0	0	2	0	0	0	0	0	0	0	3	0	0	0	0	0	0	0	0	3	0	0	0	0	3961	0	0	1	0	0	3	0	26	0	0	0	0	0	2	0	16	0	1	0	0	0
WYT110	0	3	12	0	44	1	0	0	0	0	1	0	0	63	0	0	9	0	0	0	0	0	20	1	0	0	0	64	0	0	5	0	0	9	10	8	0	0	0	7	0	0	0	154	0	0	0	0	0
WYT111	0	1	7	0	0	0	0	0	0	0	1	0	0	1	0	1	0	0	0	0	0	0	5	0	1	0	0	48	0	2	0	0	2	3	0	285	1	0	2	0	0	2	0	11	0	0	0	0	0
WYT112	0	0	21	0	0	0	0	0	0	1	0	0	0	0	0	0	0	0	0	0	0	0	16	1	0	0	1	160	0	0	0	0	0	13	0	1581	0	0	0	0	0	0	0	5	0	0	0	0	0
WYT113	0	0	1	0	0	0	0	0	0	0	1	0	2	5	0	1	28	0	0	0	0	0	9	1	8	0	9	287	0	0	0	0	6	4	0	218	0	0	0	0	0	0	0	22	0	1	0	0	0
WYT114	0	1	3	0	0	0	0	0	0	0	1	0	0	0	12	0	1	0	0	0	0	0	8	0	0	0	0	23	0	0	0	0	0	8	0	3825	0	0	0	0	0	0	0	30	0	0	0	0	0
WYT115	0	1	22	0	1	1	0	0	0	1	0	0	0	1	0	0	0	0	1	0	0	0	6	1	1	0	0	301	0	1	0	0	0	1	0	237	0	0	0	0	0	0	0	2	0	1	0	0	0
WYT13	1	0	11	0	0	0	0	0	0	0	10	0	0	1	0	0	0	0	0	0	0	0	5	0	0	0	0	509	0	2	0	0	0	9	0	262	0	1	0	0	0	2	0	11	0	0	0	0	0
WYT14	0	1	11	0	0	0	0	0	0	2	101	0	1	7	0	0	0	0	0	0	0	0	6	0	1	0	0	699	0	0	0	0	0	6	0	216	0	0	1	2	0	1	0	25	0	0	0	0	0
WYT15	2	0	23	0	0	0	0	0	0	2	306	0	0	25	0	0	0	0	0	0	0	0	6	0	1	1	2	136	1	2	1	0	0	12	0	838	0	0	0	0	0	0	0	11	0	1	0	0	0
WYT16	0	0	10	0	0	0	0	0	0	1	16	0	0	21	0	0	0	0	0	0	0	0	1	0	1	0	0	102	0	0	0	0	0	9	0	35	0	0	0	0	0	11	0	3	0	0	0	0	0
WYT17	0	0	3	0	2	0	0	2	0	1	0	0	17	0	2	0	13	0	0	0	0	0	12	0	1	0	21	108	0	1	6	0	0	14	0	173	1	0	0	0	0	0	1	7	0	1	0	0	0
WYT19	1	0	0	0	0	0	0	0	0	0	0	0	0	0	0	3	0	0	0	0	0	0	3	2	0	0	0	500	0	1	1	0	0	12	0	15	0	0	0	0	0	1	0	1	0	1	0	0	0
WYT20	0	0	0	0	1	0	0	0	0	1	0	0	0	0	0	2	0	0	0	0	0	0	13	3	2	7	0	286	0	1	0	0	0	7	0	37	0	0	0	0	0	17	0	1	0	2	0	0	0
WYT21	0	21	0	0	1	0	0	0	0	3	1	0	0	17	0	0	0	0	1	1	0	0	3	2	1	0	0	92	0	2	1	0	0	6	0	16	0	0	1	0	0	2	0	6	0	4	0	0	0
WYT22	0	7	0	0	0	0	0	0	0	0	5	0	0	5	0	0	0	0	1	0	0	0	3	1	0	0	0	179	0	5	0	1	0	4	0	18	0	0	1	0	0	0	0	2	0	1	0	0	0
WYT23	1	4	1	0	0	0	0	0	0	0	3	0	0	4	1	0	0	0	0	0	0	0	1	2	1	0	0	117	0	0	1	0	0	3	0	43	0	0	0	0	0	0	1	5	0	1	0	0	0
WYT24	0	2	2	0	0	1	0	0	0	0	2	0	0	0	0	1	0	0	0	0	0	0	1	2	0	0	0	109	0	0	0	1	0	14	0	297	1	0	0	0	0	0	0	9	0	0	0	0	0
WYT25	0	0	0	0	0	0	0	0	0	1	1	0	0	4	0	0	0	0	0	0	0	0	17	0	0	0	0	255	0	16	0	0	0	0	0	7	0	0	0	0	0	0	0	8	0	0	0	0	0
WYT26	0	0	0	0	0	0	0	1	0	1	0	0	0	0	0	0	0	0	0	0	0	0	0	0	0	0	0	64	0	0	7	0	0	15	0	7	0	0	0	0	0	0	0	821	0	0	0	0	0
WYT27	1	2	0	0	0	0	0	0	0	0	1	0	0	0	0	1	0	0	0	0	0	0	5	0	0	0	0	160	0	0	0	0	0	8	0	6	0	0	0	0	0	0	0	6	0	0	0	0	0
WYT28	0	0	1	0	0	0	1	0	0	0	0	0	0	0	1	0	0	0	0	0	0	0	16	0	0	0	0	194	0	0	0	0	1	1	0	150	0	0	0	0	0	0	0	33	0	0	0	0	0
WYT29	0	0	4	0	0	0	0	0	0	0	0	0	0	7	0	5	0	0	0	0	0	0	5	0	0	0	0	165	0	0	0	0	0	15	0	230	0	0	0	0	0	0	0	12	0	0	0	0	0
WYT30	1	0	0	0	0	0	1	0	0	2	1	0	2	1	0	3	0	0	0	0	0	0	30	0	0	0	0	167	0	0	0	0	0	0	0	25	0	1	0	0	0	3	0	12	0	36	0	0	0
WYT31	0	0	0	0	0	0	0	0	0	0	0	0	0	1	0	0	1	0	0	0	0	0	3	0	0	0	0	205	0	4	2	0	0	6	0	62	0	0	0	0	0	0	0	2	0	0	0	0	0
WYT32	0	0	2	0	0	0	0	0	0	0	0	0	0	0	0	0	1	0	0	0	0	0	1	0	0	1	0	87	0	1	0	0	0	38	0	4	0	0	0	0	0	1	0	0	0	0	0	0	2
WYT33	0	0	0	0	0	0	0	0	0	0	0	0	0	0	0	0	1	0	0	0	0	0	7	0	0	0	0	128	0	2	0	0	0	3	0	9	1	0	0	0	0	0	0	32	0	1	0	0	0
WYT34	1	0	9	0	0	0	0	0	0	0	1	0	0	0	0	0	0	0	0	0	0	0	5	0	30	0	0	1553	0	1	0	0	0	8	0	10	0	0	0	0	0	0	0	18	0	132	0	0	0
WYT36	1	0	1	0	0	0	0	0	0	0	1	0	0	0	0	0	0	0	0	0	0	0	2	0	2	0	0	190	0	1	0	0	0	4	0	9	0	0	0	0	0	0	0	5	0	0	0	0	0
WYT37	0	0	0	0	0	0	0	0	0	0	4	0	0	2	0	0	1	0	0	0	0	0	4	0	0	0	0	224	0	0	0	0	0	0	0	228	0	0	0	0	0	7	0	14	0	0	0	0	0
WYT38	0	0	0	0	0	0	0	0	0	0	0	0	0	0	0	1	2	0	0	0	0	0	22	0	0	0	0	127	1	0	0	0	0	1	0	11	3	0	0	0	0	3	0	12	0	0	0	0	0
WYT39	0	0	1	0	1	0	0	0	0	0	1	0	0	0	0	0	0	0	0	0	0	0	7	0	0	1	0	182	0	0	3	0	0	5	0	83	0	0	0	3	0	0	0	4	0	0	0	2	0
WYT40	0	0	0	0	0	0	1	0	0	0	2	0	0	20	0	1	0	0	0	0	0	0	4	0	0	0	0	137	0	6	0	0	0	8	0	3	0	0	0	0	0	0	0	11	0	0	0	0	0
WYT41	1	0	1	0	0	0	0	0	0	0	1	0	0	0	0	1	0	0	0	0	0	0	11	0	0	0	2	140	0	7	0	0	0	10	0	364	3	0	0	0	0	0	0	21	0	3	0	0	0
WYT42	0	0	0	0	0	0	0	1	0	0	0	0	0	1	0	1	0	0	0	0	0	0	1	0	3	0	0	60	0	1	0	0	0	16	0	14	0	0	0	0	0	0	0	1	0	2	0	0	0
WYT43	1	0	0	0	0	0	0	0	0	0	1	0	0	7	0	0	0	0	0	0	0	0	3	0	0	0	0	87	0	0	0	0	0	9	0	29	0	0	0	0	0	3	0	9	0	0	0	0	0
WYT44	0	0	0	0	1	0	2	0	0	0	0	0	0	1	8	1	0	0	0	0	0	0	2	0	0	0	0	86	0	1	1	0	0	6	0	7	0	0	0	0	0	4	0	4	0	0	0	0	0
WYT45	1	0	0	0	0	0	0	0	0	0	1	0	0	0	0	0	0	0	0	0	0	0	0	0	0	1	0	170	0	2	1	0	0	11	0	6	0	0	1	0	0	0	0	4	0	0	0	0	0
WYT46	0	0	0	0	0	0	0	0	0	5	2	0	0	50	0	0	0	0	0	0	0	0	4	0	0	0	0	40	0	1	0	0	1	15	0	217	0	0	0	0	0	0	0	115	0	0	0	0	0
WYT47	0	0	0	0	0	0	0	0	0	1	1	0	0	0	0	1	0	0	0	0	0	0	2	0	0	0	0	43	0	2	0	0	0	38	0	3	0	0	0	0	0	0	0	1	0	1	0	0	0
WYT48	0	0	0	0	1	0	0	0	0	1	1	0	0	0	0	0	0	0	0	0	0	0	2	0	0	0	0	424	0	1	0	0	0	6	0	7	0	0	0	0	0	12	0	10	0	0	0	0	0
WYT49	1	0	2	0	1	0	0	0	0	0	14	0	0	6	0	0	0	0	0	0	0	0	4	0	0	0	0	157	0	26	1	0	0	7	0	21	1	0	0	0	0	0	0	0	0	7	0	0	0
WYT50	0	1	0	0	0	0	0	0	0	1	2	0	0	1	1	2	0	0	0	0	0	0	3	0	0	0	0	353	0	5	0	0	0	2	0	17	0	0	0	0	0	0	0	7	0	47	0	0	0
WYT51	0	0	0	0	0	0	0	0	0	2	2	0	0	1	5	1	1	0	0	0	0	0	4	0	0	0	0	160	0	0	0	0	0	6	0	392	1	0	1	0	0	4	0	5	0	0	0	1	0
WYT52	0	0	1	0	0	0	0	0	0	1	0	0	0	3	1	0	0	0	0	0	0	0	1	0	0	0	0	158	0	0	0	0	0	20	0	388	0	0	1	0	0	0	0	3	0	0	0	0	0
WYT53	7	0	3	0	8	0	0	0	0	1	37	0	0	52	13	0	1	0	0	0	0	0	1	0	0	0	0	32	0	1	0	0	0	2	0	17	0	0	0	0	0	1	0	29	0	0	0	0	0
WYT54	0	0	3	0	0	0	0	0	0	1	0	0	0	0	0	0	0	0	0	0	0	0	16	0	0	0	0	205	0	4	0	0	0	13	0	749	0	0	0	0	0	0	0	28	0	7	0	0	0
WYT55	1	0	0	0	0	0	0	0	0	0	1	0	0	1	0	4	0	0	0	0	0	0	5	0	0	0	0	178	0	2	0	0	0	11	0	323	0	0	0	3	0	48	0	13	0	0	0	0	0
WYT56	1	0	0	0	0	0	1	0	0	0	1	0	0	0	0	0	0	0	0	0	0	0	29	0	0	0	0	149	0	0	0	0	5	15	0	11	0	0	0	0	0	0	0	6	0	0	0	0	0
WYT57	0	0	20	0	0	1	0	0	0	0	216	0	1	56	0	0	0	0	0	0	0	0	28	0	4	0	50	23	0	0	1	0	0	10	0	23	24	0	0	0	0	0	0	0	0	0	0	0	0
WYT58	0	0	4	0	0	1	0	0	0	0	15	0	0	0	0	0	0	0	0	0	0	0	2	0	1	0	1	282	0	0	0	0	0	20	0	486	0	0	0	0	0	24	0	2	0	0	0	0	0
WYT59	0	0	1	3	0	0	1	0	0	0	23	0	0	2	0	0	0	0	0	0	0	0	3	1	3	0	0	306	0	0	2	0	0	10	0	12	0	0	0	0	0	1	0	1	0	0	0	0	0
WYT60	0	3	1	1	0	0	0	0	0	0	0	0	1	150	0	0	0	1	0	0	0	0	19	1	0	0	0	1064	0	0	0	0	0	4	0	175	0	0	0	0	0	1	0	0	0	0	0	0	0
WYT61	0	48	1	0	0	1	0	0	0	0	0	0	1	162	0	0	0	2	0	0	0	0	33	0	0	0	0	115	0	0	0	0	0	8	0	575	0	0	0	0	0	0	0	4	0	1	0	0	0
WYT62	0	0	0	0	0	2	0	0	0	0	1	0	0	1	0	0	0	0	0	0	0	0	7	0	0	0	0	4	106	0	0	0	0	0	96	2	0	0	0	0	0	0	0	0	0	0	0	0	0
WYT64	0	0	10	0	0	0	0	0	0	0	0	0	0	1	0	9	0	0	0	0	0	0	7	0	0	0	0	314	0	0	0	0	0	1	0	10	6	0	0	0	0	6	0	1	0	0	0	0	0
WYT65	0	3	2	0	0	0	0	0	0	0	1	0	0	0	0	53	0	0	0	0	0	0	81	0	0	0	0	87	0	0	0	0	0	1	0	4	0	0	0	0	0	0	0	4	0	40	0	0	0
WYT66	0	4	32	0	0	0	0	2	1	0	1	0	3	5	0	0	0	0	1	0	0	0	37	2	26	0	0	302	0	0	0	0	0	0	2	6	0	0	0	0	0	10	0	3	0	0	0	0	0
WYT67	0	2	7	0	0	0	0	0	0	4	3	0	0	2	0	2	0	0	0	0	0	0	4	0	0	0	0	86	0	1	0	0	0	19	0	9	0	0	0	0	0	0	0	4	0	85	0	0	0
WYT69	2	0	1	0	0	1	0	0	0	0	1	0	0	0	0	0	0	0	0	0	0	0	6	0	4	0	0	355	0	3	0	0	0	5	0	72	0	0	0	0	0	3	0	1	0	0	0	0	0
WYT71	0	0	0	0	0	0	0	0	0	1	3	0	0	1	0	0	0	0	0	0	0	0	0	0	0	0	0	166	6	0	0	0	0	16	0	18	0	0	0	0	0	0	0	6	0	43	0	0	0
WYT72	0	0	0	0	0	0	0	0	0	3	0	0	0	1	0	1	0	0	0	0	0	0	0	0	0	3	0	539	0	0	0	0	0	26	0	17	0	0	0	0	0	1	0	4	0	0	0	0	0
WYT73	2	0	1	0	0	0	0	0	0	4	1	0	0	1	0	0	0	0	0	0	0	0	0	0	0	0	1	313	0	2	0	0	0	17	0	12	1	0	0	0	0	3	367	13	0	0	0	0	0
WYT74	0	0	0	0	0	0	0	0	0	0	2	0	1	1	0	1	0	0	0	0	0	0	4	0	2	0	0	1240	0	11	0	0	0	2	0	449	0	0	0	0	0	0	0	7	0	18	0	0	0
WYT75	0	0	0	0	0	0	0	0	0	0	0	0	0	2	0	1	0	0	0	0	0	0	0	0	0	0	0	274	0	0	0	0	0	9	0	1	0	0	0	0	0	0	0	1	0	1	0	0	0
WYT76	1	0	9	0	0	1	0	0	0	1	2	0	0	0	0	0	0	0	0	0	0	0	5	0	0	0	0	97	0	2	0	0	1	26	0	22	0	0	0	0	0	0	0	7	0	71	0	0	0
WYT77	1	0	1	0	0	0	0	0	0	770	1	0	0	25	0	0	0	2	0	0	0	0	0	0	0	0	0	67	0	0	0	0	0	15	0	519	0	0	0	0	0	0	2	21	0	6	0	0	0
WYT78	0	0	0	0	0	0	0	0	0	0	1	0	0	2	0	0	0	0	0	0	0	0	1	0	0	0	0	234	0	1	0	0	0	3	0	22	2	0	0	0	0	0	0	9	0	81	0	0	0
WYT79	0	0	0	0	0	0	0	0	0	0	0	0	0	1	0	0	1	0	0	0	0	0	0	0	0	0	0	398	0	0	0	0	0	1	0	80	0	0	0	0	0	0	1	6	0	51	0	0	0
WYT80	1	0	0	0	1	0	0	0	0	0	1	0	0	1	0	0	0	0	0	0	0	1	5	0	0	0	0	232	0	1	1	0	0	3	0	7	0	0	0	0	0	0	1	1	0	0	0	0	0
WYT81	1	0	1	0	0	0	0	1	0	59	2	0	0	9	0	0	0	0	0	0	0	0	0	0	1	0	0	455	0	2	0	0	0	10	0	999	0	0	0	0	0	1	0	24	0	1	0	0	0
WYT82	1	0	1	0	0	0	0	0	0	0	9	0	0	143	0	0	0	0	0	1	0	0	4	0	0	0	0	244	0	1	0	0	0	14	0	113	0	0	0	0	0	3	0	986	0	1	0	0	0
WYT83	0	0	3	0	0	0	0	0	0	0	1	0	1	2	0	0	1	0	0	0	1	0	2	0	0	0	0	1763	0	0	0	0	0	6	1	14	0	0	0	0	0	10	0	5	0	0	0	0	0
WYT84	0	0	3	0	1	0	0	0	0	3	0	0	0	0	0	0	0	0	0	0	0	0	1	0	1	0	0	70	0	0	0	0	0	18	0	11	0	0	0	0	0	1	1	3	0	3	0	0	0
WYT85	0	0	0	0	0	1	0	0	0	0	1	0	0	2	0	0	1	0	0	5	1	0	0	0	0	0	0	223	0	0	0	0	0	1	0	3	1	0	0	0	0	0	0	4	0	10	0	0	0
WYT86	0	0	2	0	1	0	0	0	0	1	220	0	0	13	0	1	0	1	0	0	1	0	6	0	2	0	0	115	0	1	0	0	0	3	0	40	0	0	0	0	0	0	1	3	0	4	0	0	0
WYT88	0	0	0	0	0	0	0	0	0	0	5	0	0	0	0	0	0	0	0	0	0	0	2	0	0	0	0	381	0	1	1	0	0	0	0	7	0	0	0	0	0	0	0	2	0	2	0	0	0
WYT89	1	0	33	0	1	1	0	0	0	0	5	0	0	4	0	1	0	1	0	0	2	0	5	0	0	0	0	380	0	58	0	0	5	2	1	3	35	0	0	0	0	0	0	6	0	1	0	0	0
WYT90	2	0	1	0	0	0	0	0	0	0	5	0	21	0	0	1	0	0	0	0	0	0	9	0	0	0	0	218	0	0	0	0	0	1	0	11	5	0	0	0	0	0	0	3	0	24	0	0	0
WYT91	0	0	0	0	0	0	0	1	0	1	3	0	0	4	0	0	4	0	0	0	1	0	4	0	0	0	0	148	0	9	0	0	0	14	0	18	1	0	0	0	0	0	0	28	0	0	0	0	0
WYT92	0	0	0	0	1	0	0	0	0	0	2	0	1	8	0	3	0	0	0	0	0	0	4	0	0	0	0	490	0	0	0	0	0	5	0	102	0	0	0	0	0	0	1	6	0	0	0	0	0
WYT93	0	0	1	0	0	0	0	200	18	0	0	0	0	7	0	2	0	1	0	0	1	0	3	0	0	0	0	668	0	1	0	0	0	14	0	2	0	0	0	0	0	0	0	1	0	2	4	0	0
WYT96	0	0	5	0	495	0	0	0	0	0	0	0	0	4	0	3	0	0	0	0	0	0	8	0	0	0	1	5988	0	0	0	0	0	7	0	13	1	0	0	0	0	3	0	2	0	0	0	0	0
WYT97	0	0	33	0	0	0	0	0	0	1561	0	0	0	1	0	0	0	0	0	0	0	0	8	0	0	1	0	37	0	0	0	0	0	13	0	14	0	0	0	0	0	0	0	3	0	0	0	0	0
WYT99	0	0	2	0	2	0	0	0	0	0	0	0	0	45	0	0	0	3	6	0	0	0	35	369	0	0	0	37	0	0	0	0	0	3	1	501	0	0	0	0	0	0	0	3	0	11	0	0	0
[truncated: 532 more columns]
